# Supplementary material for: Rice_Phospho 1.0: a new rice-specific SVM predictor for protein phosphorylation sites
Source: Sci Rep. 2015 Jul 7;5:11940. doi: 10.1038/srep11940 (PMC4493637; doi:10.1038/srep11940)
Supplement: Supplementary Information [file srep11940-s1.pdf]

---

# **Rice\_Phospho 1.0: a new rice-specific SVM predictor on protein phosphorylation sites**

Shoukai Lin<sup>1#</sup>, Qi Song<sup>1#</sup>, Huan Tao<sup>1#</sup>, Wei Wang<sup>1</sup>, Weifeng Wan<sup>1</sup>, Jian Huang<sup>1</sup>, Chaoqun Xu<sup>1</sup>, Vivien Chebii<sup>1</sup>, Justine Kitony<sup>1</sup>, Shufu Que<sup>1</sup>, Andrew Harrison<sup>2</sup> & Huaqin He<sup>1\*</sup>

<sup>1</sup>College of Life Sciences, Fujian Agriculture and Forestry University, Fuzhou 350002, China.

<sup>2</sup>Department of Mathematical Sciences, University of Essex, Wivenhoe Park, Colchester, CO4 3SQ, UK

\*To whom correspondence may be addressed. E-mail: hehq3@fafu.edu.cn

# These authors contributed equally to this work.

Subject Category: Computational biology and bioinformatics

Type: research article

Table S1. The 25-mer sequences (-12 to +12) surrounding phosphorylation sites were extracted from phospho-protein sequences and compiled into the positive dataset.

| No. | Protein Name     | Sequence                    | Phospho-amino acid | Position |  | No. | Protein Name     | Sequence                    | Phospho-amino Acid | Position |
|-----|------------------|-----------------------------|--------------------|----------|--|-----|------------------|-----------------------------|--------------------|----------|
| 1   | LOC_Os01g01150.1 | QHKSKKSEEGSKSRKDDCLLDLDTLS  | S                  | 863      |  | 2   | LOC_Os01g01150.1 | DPDQDDDLHRPSSPAQASRDAYSDA   | S                  | 57       |
| 4   | LOC_Os01g01150.1 | PSSPAQASRDAYSADDDDDDRPHA    | S                  | 67       |  | 5   | LOC_Os01g01150.1 | VSSYAHKRSSSAFEDFMNSNSKRS    | S                  | 733      |
| 7   | LOC_Os01g01150.1 | KLDVSSVAHKRSSASSEDPMNSNS    | S                  | 730      |  | 8   | LOC_Os01g01150.1 | SDSRSPKRRHFEESI SPKSRRSARA  | S                  | 629      |
| 10  | LOC_Os01g01150.1 | SRKDDCLLDLTDSSDRRKQSEDSF    | S                  | 875      |  | 11  | LOC_Os01g01150.1 | SRSPIKYRRSRRSRSYSPPYRHTRG   | S                  | 541      |
| 13  | LOC_Os01g01510.1 | RGKNAYYDAGEOSGDDEDDYFEARR   | S                  | 140      |  | 14  | LOC_Os01g01510.1 | LSMDFGL EDGESDEEDRATKASNH   | S                  | 173      |
| 16  | LOC_Os01g01510.1 | KEQKYSNPNTYTESLEETEGDGKRR   | S                  | 563      |  | 17  | LOC_Os01g01510.1 | ARRTQKEFEESKLSMDFGL EDGESD  | S                  | 162      |
| 19  | LOC_Os01g01510.1 | PTVKKPPVMAASASDDDEIDAFHKHR  | S                  | 26       |  | 20  | LOC_Os01g01689.1 | KESEDTDSCLDPSQAFCEGNKDAAR   | S                  | 2777     |
| 22  | LOC_Os01g01800.1 | QTPYPHTQSPMSSPVQVRGDMGVAG   | S                  | 401      |  | 23  | LOC_Os01g01800.1 | TQTPYPHTQSPMSSPVQVRGDMGVAG  | S                  | 400      |
| 25  | LOC_Os01g01960.1 | NTPKVEREEGELSPNGDEFEEDNAP   | S                  | 873      |  | 26  | LOC_Os01g01960.1 | DMHDHDDQAKAESGEAAGTTETHD    | S                  | 987      |
| 28  | LOC_Os01g03500.1 | AKENANI IDADDSDELRSICSEDE   | S                  | 131      |  | 29  | LOC_Os01g03520.1 | LSVAFGEVTRIASELFARESGDDID   | S                  | 727      |
| 31  | LOC_Os01g03520.1 | NYSNGVDYDQSSILPDKVRVLIWTD   | S                  | 105      |  | 32  | LOC_Os01g03520.1 | DVNSNGVDYDQSSILPDKVRVLIWTD  | S                  | 104      |
| 34  | LOC_Os01g03760.1 | AARVLAATAASAYSDDDDDSDFAQA   | S                  | 102      |  | 35  | LOC_Os01g03760.1 | ATASAYSDDDDDSDFAQA TRPEGEV  | S                  | 108      |
| 37  | LOC_Os01g04100.1 | NRAGDATAAARRSPEQLDGVKRLI    | S                  | 70       |  | 38  | LOC_Os01g04160.1 | SSMPDDFLSRSDSLPIERSSRIQPV   | S                  | 229      |
| 40  | LOC_Os01g04330.1 | PTREDADGGRTSPSELAAVTRATA    | S                  | 44       |  | 41  | LOC_Os01g04650.1 | ARHPHDVQSPDPSMIDKNSSEFST    | S                  | 268      |
| 43  | LOC_Os01g04650.1 | TGSLDGPTRGTSTDSASVNCILGL    | S                  | 207      |  | 44  | LOC_Os01g04650.1 | DGPTRGTSTDSASVNCILGL EDDSS  | S                  | 212      |
| 46  | LOC_Os01g04650.1 | WVVDALNSAITSGLDGPTRGTSTDS   | S                  | 198      |  | 47  | LOC_Os01g04650.1 | SVSPDPMIDKNSSEFSTSAISL SN   | S                  | 276      |
| 49  | LOC_Os01g04650.1 | PMIDKNSSEFSTSAISL SNLPPIR   | S                  | 281      |  | 50  | LOC_Os01g04650.1 | RGDSWDEPPPPSSAAAAAAGGGR     | S                  | 43       |
| 52  | LOC_Os01g04650.1 | STSPSDASSRVSDDDKSDHGGGGG    | S                  | 360      |  | 53  | LOC_Os01g04650.1 | DASSRVSDDDKSDHGGGGGRRPOP    | S                  | 365      |
| 55  | LOC_Os01g04720.1 | SEFVSAAATVLSERSPWPEPASRY    | S                  | 137      |  | 56  | LOC_Os01g05010.1 | RIIDAEIKAEFESDDHDFVEITPDN   | S                  | 81       |
| 58  | LOC_Os01g05420.1 | IQELWDTIAGDSEDDQDQVRTIID    | S                  | 194      |  | 59  | LOC_Os01g05420.1 | BDLGDHNRGSEPTPTVPHDQDAGS    | S                  | 47       |
| 61  | LOC_Os01g05420.1 | PADRYGSDNGHSPRHVPOAFEGEE    | S                  | 229      |  | 62  | LOC_Os01g05820.1 | LSGGGDDSRVYSGGGGGVRLSPHE    | S                  | 61       |
| 64  | LOC_Os01g06270.1 | QVPSTPKAETVYSPKSPAKPDQPI    | S                  | 485      |  | 65  | LOC_Os01g06290.1 | ERRDMSTAAANGSPSPRDYDNGNH    | S                  | 302      |
| 67  | LOC_Os01g07110.1 | SPMFQGTSGKMVSLSKGSTOKARAV   | S                  | 178      |  | 68  | LOC_Os01g07260.1 | BSSPGDILRRITASCFTSEQRKKR    | S                  | 155      |
| 70  | LOC_Os01g07520.1 | DRI RRRHSSNGSADIVLPSYDFQP   | S                  | 59       |  | 71  | LOC_Os01g07880.1 | APNNKEGGGVESDFEIRRVPEMG     | S                  | 44       |
| 73  | LOC_Os01g07890.1 | QRSQTFRRSGSSGLVWDFRMLDG     | S                  | 17       |  | 74  | LOC_Os01g08260.1 | GIUNATSYQPVIVISERFVSYRERA   | S                  | 413      |
| 76  | LOC_Os01g08410.1 | SQEPADGTEETASAEFDDTTSVDY    | S                  | 265      |  | 77  | LOC_Os01g08420.1 | NGAVATRLSNKSTISYPAGEDQRTV   | S                  | 711      |
| 79  | LOC_Os01g08430.1 | ATDESRVLYMDSDDEEVVSVRRKL    | S                  | 1186     |  | 80  | LOC_Os01g08560.1 | KMETDDAPNEAASGDTVMQFAKAP    | S                  | 527      |
| 82  | LOC_Os01g09280.1 | VKQKEPPEFAHLSDLQIKRHEESEF   | S                  | 221      |  | 83  | LOC_Os01g09550.1 | QQRRRDSGGSGSCSTRDHEVSATSY   | S                  | 301      |
| 85  | LOC_Os01g09570.1 | HLHNTQLLEGSSPVKDSKCNKGT     | S                  | 515      |  | 86  | LOC_Os01g09570.1 | HLHNTQLLEGSSPVKDSKCNKGT     | S                  | 516      |
| 88  | LOC_Os01g09620.1 | GWSPSSSAYVSGPKAATGLYSIPT    | S                  | 294      |  | 89  | LOC_Os01g09620.1 | SEPOLRIANKVKSPPSGGWSPSSA    | S                  | 278      |
| 91  | LOC_Os01g09790.1 | KGGRKWKWRSSSGDGHGSGWRSG     | S                  | 49       |  | 92  | LOC_Os01g09850.1 | RCDGTLFSRRDSELTTHRAFDAL     | S                  | 191      |
| 94  | LOC_Os01g10610.1 | VRAWGERITHEDSGSDILFETIGSS   | S                  | 347      |  | 95  | LOC_Os01g10610.1 | AWPGERITHEDSGSDILFETIGSSRT  | S                  | 349      |
| 97  | LOC_Os01g10690.1 | QICAKEANADSSDDQAAVHYKRG     | S                  | 296      |  | 98  | LOC_Os01g10690.1 | AKGQDQGLPGSSSPKKGTSNKAEPD   | S                  | 199      |
| 100 | LOC_Os01g10820.1 | RASKVLEQLSGOSPVSFKARYTVRS   | S                  | 46       |  | 101 | LOC_Os01g10820.1 | SPVESKARYTVRSFGRIRNEKILACY  | S                  | 58       |
| 103 | LOC_Os01g11040.1 | MDKAHEVQSKCTSPQEQFIDHREME   | S                  | 388      |  | 104 | LOC_Os01g11040.1 | SNTPLHTRINGTSAADIGDILKQSS   | S                  | 330      |
| 106 | LOC_Os01g11330.1 | AGVTIKRKNQCSAPKRTMGAVLG     | S                  | 556      |  | 107 | LOC_Os01g11580.1 | NTADDNERYVYSSSPVHLIDQKGN    | S                  | 301      |
| 109 | LOC_Os01g11580.1 | EIDNSKVLERSDTSVHAAGWEATPK   | S                  | 126      |  | 110 | LOC_Os01g11920.1 | ANYGHGTVRSRSGGVVYAEADV      | S                  | 179      |
| 112 | LOC_Os01g11960.1 | RGLFELFETDGGCSLEKSYNDOSTPD  | S                  | 271      |  | 113 | LOC_Os01g12280.1 | PRRTDILPSQPTSPERATSPALTST   | S                  | 101      |
| 115 | LOC_Os01g12480.1 | LSMDYRKPAAEKSDDTSDDDDEPDI   | S                  | 64       |  | 116 | LOC_Os01g12480.1 | YRKPAAEKSDDTSDDDDEPDIIDIGK  | S                  | 68       |
| 118 | LOC_Os01g12650.1 | KLHTGGDGGSSDSDADDERKPPSA    | S                  | 36       |  | 119 | LOC_Os01g12650.1 | KIADKLTHTGGDGGSSDSDADDERKPP | S                  | 32       |
| 121 | LOC_Os01g12660.1 | STSSFPKLRNASTSSDWSSIASQGP   | S                  | 216      |  | 122 | LOC_Os01g12660.1 | SSFPKLRNASTSSDWSSIASQGP     | S                  | 218      |
| 124 | LOC_Os01g12660.1 | PPNNPASI RRASSTWFEKILVQAV   | S                  | 241      |  | 125 | LOC_Os01g12660.1 | GSSTDSSEKRSISEFTILKRVKILGL  | S                  | 161      |
| 127 | LOC_Os01g12780.1 | QMAVDGKLRASSRSTTOPPPRRR     | S                  | 111      |  | 128 | LOC_Os01g12780.1 | MAAVDNGKLRASSRSTTOPPPRRRR   | S                  | 112      |
| 130 | LOC_Os01g13160.1 | TJKNELSDIFGSSPEPFQFQFVFDK   | S                  | 511      |  | 131 | LOC_Os01g13270.1 | LYMEYCSGGNLSHRLRORIKNHEPE   | S                  | 226      |
| 133 | LOC_Os01g13530.1 | LITSTQTKETRAGSPITPNSNPLARSA | S                  | 242      |  | 134 | LOC_Os01g13530.1 | ROHMSRKHKSQSTJSTPVGRQSTMR   | S                  | 184      |
| 136 | LOC_Os01g14050.1 | AGEPGRSLTSLSRKSRKPEDKIL     | S                  | 606      |  | 137 | LOC_Os01g14440.1 | SSTGNKQDFERGSDPAPSTAAAWLP   | S                  | 245      |
| 139 | LOC_Os01g14514.1 | PSPRGSGVHARCSPENLVEMSGSM    | S                  | 119      |  | 140 | LOC_Os01g14690.1 | LISKDHERAYEDSADWALKSGSQGG   | S                  | 65       |
| 142 | LOC_Os01g14950.1 | QLEATTQFKRLSTERSPPTEVTLQ    | S                  | 101      |  | 143 | LOC_Os01g14950.1 | QAVTALGVAVAGSPKCRDLVLANGA   | S                  | 189      |
| 145 | LOC_Os01g15020.1 | FIKDEPMSTSTSSATSPNPAADQTOR  | S                  | 1117     |  | 146 | LOC_Os01g15020.1 | DHTCTPPNGARSGSPVPLAAVPKA    | S                  | 213      |
| 148 | LOC_Os01g15039.1 | VAQDGSGRWRTVSEAVARAPSHSR    | S                  | 319      |  | 149 | LOC_Os01g15260.1 | SSDIDRKPAAGASPPPGAAAAAGHK   | S                  | 34       |
| 151 | LOC_Os01g15600.1 | DDVGAGETAGHGSSQASGPEVDNVER  | S                  | 203      |  | 152 | LOC_Os01g15600.1 | AGETAGHGSSQASGPEVDNVERIDL   | S                  | 207      |
| 154 | LOC_Os01g16020.1 | TVAAKEPIKRLQSGTRARAAGKVAG   | S                  | 269      |  | 155 | LOC_Os01g16030.1 | NAAETDKLGLHSLRORHWYQSTC     | S                  | 147      |
| 157 | LOC_Os01g16110.1 | HYGVSSEPPSSNTGYFYGSTPFNH    | S                  | 700      |  | 158 | LOC_Os01g16110.1 | SPSSNTGYFYGSTPFNHYSRSSRL    | S                  | 707      |
| 160 | LOC_Os01g16110.1 | LSSSVTSYLNKGLSNISIDNKEPKSTS | S                  | 476      |  | 161 | LOC_Os01g16110.1 | KYWAHEHPRNODSSPTIKHPELERI   | S                  | 875      |
| 163 | LOC_Os01g16110.1 | PHGTPGSSPVGSPKSPFPFQHPFS    | S                  | 735      |  | 164 | LOC_Os01g16110.1 | TPNHYSRSSRLSSSPHGTPGSSPVG   | S                  | 720      |
| 166 | LOC_Os01g16110.1 | PENHSYRSSRLSSSPHGTPGSSSPV   | S                  | 721      |  | 167 | LOC_Os01g16110.1 | ENHSYRSSRLSSSPHGTPGSSSPVG   | S                  | 722      |
| 169 | LOC_Os01g16330.1 | SSRPSRSLVGMSSRSTRAVQNNQP    | S                  | 229      |  | 170 | LOC_Os01g16330.1 | SRPSRSLVGMSSRSTRAVQNNQPS    | S                  | 230      |
| 172 | LOC_Os01g16390.1 | LRYKLEPPAAASSSGEYAPRCYDDL   | S                  | 154      |  | 173 | LOC_Os01g16390.1 | RYKLEPPAAASSSGEYAPRCYDDL    | S                  | 155      |
| 175 | LOC_Os01g16870.1 | AQVSQFTKDEMFSTSSSHGGHTSAG   | S                  | 870      |  | 176 | LOC_Os01g16870.1 | SQFTKDEMFSTSSSHGGHTSAGSA    | S                  | 873      |
| 178 | LOC_Os01g16870.1 | FIKDEPMSTSTSSHGHTSAGSAPV    | S                  | 875      |  | 179 | LOC_Os01g16870.1 | MSETSSSHGGHTSAGSAPVPELRL    | S                  | 881      |
| 181 | LOC_Os01g17320.1 | PPPADKKDLITDESSDEDTTIDAL    | S                  | 112      |  | 182 | LOC_Os01g17320.1 | SGDKQDELFGESDILEVPPPADKKD   | S                  | 95       |
| 184 | LOC_Os01g18890.1 | AHSEGRSGCSAEPERLYPQVAPDM    | S                  | 115      |  | 185 | LOC_Os01g19480.1 | NGRYNTSMCKVL SNHWSGERKKELR  | S                  | 328      |
| 187 | LOC_Os01g19760.1 | SKDLPRVLTNTSGRWNPVNDPSAP    | S                  | 847      |  | 188 | LOC_Os01g19894.1 | AFVQKREFRPVKSNSRTTYDYKCTQ   | S                  | 845      |
| 190 | LOC_Os01g20940.1 | SSAGSGRSGSDSPVLSRETSNNSKVF  | S                  | 590      |  | 191 | LOC_Os01g20950.1 | QVYVVRDRAPISSLIPAPRLATHPT   | S                  | 141      |
| 193 | LOC_Os01g21590.1 | GHHKRRRGDVSAGAGDDDDDEGCV    | S                  | 380      |  | 194 | LOC_Os01g21590.1 | DDEGPSAVQQLDSFLAAVAGGGDP    | S                  | 418      |
| 196 | LOC_Os01g21960.1 | SPRYMDKILGFQASADGGSGTFRHN   | S                  | 143      |  | 197 | LOC_Os01g21960.1 | KDLGFQASADGGSGTFRHNSAHAIT   | S                  | 149      |
| 199 | LOC_Os01g23540.1 | GNALKAVOCOKRSLDMVHTSPSPPA   | S                  | 763      |  | 200 | LOC_Os01g23540.1 | DKRSLDMVHTSPSPPAATL PKKVS   | S                  | 772      |
| 202 | LOC_Os01g23590.1 | LEKEEEDYFNEDSDEEDSVRRTHKA   | S                  | 700      |  | 203 | LOC_Os01g23590.1 | EDYFNEDSDEEDSVRRTHKAQKQDG   | S                  | 705      |
| 205 | LOC_Os01g23640.1 | EEFLSOLSTKQSPPPVLAELERRP    | S                  | 307      |  | 206 | LOC_Os01g23930.1 | GRRPSPLPRBSVDRSGPSSSRBG     | S                  | 1368     |
| 208 | LOC_Os01g25040.1 | PTGPSANVRKILYSKDTISGYNAH    | S                  | 829      |  | 209 | LOC_Os01g25330.1 | TKGWDVHMMLSSEPHSGPEKTSMM    | S                  | 777      |
| 211 | LOC_Os01g25370.1 | RNSPSCFTTPSSPOHPRLGLI EGY   | S                  | 139      |  | 212 | LOC_Os01g25610.1 | DEDAKFKLCKVBSYQFGKGTPIVYN   | S                  | 128      |
| 214 | LOC_Os01g26940.1 | ETNRRRASRELSPHGRONSPPSPPE   | S                  | 348      |  | 215 | LOC_Os01g26940.1 | RSRPTHSPKELDSPRPFENYVKLIAT  | S                  | 307      |





|     |                  |                             |   |      |  |     |                  |                             |   |     |
|-----|------------------|-----------------------------|---|------|--|-----|------------------|-----------------------------|---|-----|
| 667 | LOC_Os02g04270.1 | AEVTKDGDSDSDSDGDDDAMERID    | S | 995  |  | 668 | LOC_Os02g04450.1 | SEFGLSQIPRNFESFSDITDFDSQSA  | S | 267 |
| 670 | LOC_Os02g04660.1 | RSNHVNSQGGVLSGDFNHTEDTAVR   | S | 275  |  | 671 | LOC_Os02g05310.1 | DDYRRRRRIARTISPEPRHDPFAAGEA | S | 126 |
| 673 | LOC_Os02g05450.1 | QMEGEPITGNDFQSEDEWGLNKRKK   | S | 399  |  | 674 | LOC_Os02g05450.1 | QRTESSESLTSVSKRATRONTPRKP   | S | 31  |
| 676 | LOC_Os02g05450.1 | QKGLDKKPKSINSPPRPDQNETCLS   | S | 557  |  | 677 | LOC_Os02g05450.1 | SPPRPDQNETCLSEPTDKKEGTPTPT  | S | 569 |
| 679 | LOC_Os02g05620.1 | SALFIPRPRRAGSFQTRHTNDKLTTS  | S | 639  |  | 680 | LOC_Os02g05840.1 | MPGGGGLDNNNGSPKANSGGSDPS    | S | 458 |
| 682 | LOC_Os02g06430.1 | EVAQHPHPERTVSLPSDSGNLGVKP   | S | 625  |  | 683 | LOC_Os02g06740.1 | SRLSSMCLTPKLSTVKGSKCHSCVQ   | S | 335 |
| 685 | LOC_Os02g07070.1 | DI CSEPHERRGLSHERDRSPYMOHS  | S | 168  |  | 686 | LOC_Os02g07070.1 | HERRGLSHERDRSPYMOHSRSRSG    | S | 174 |
| 688 | LOC_Os02g07070.1 | ERDRDYDRYSYSDSYDEKSRDRGWSR  | S | 141  |  | 689 | LOC_Os02g07070.1 | DSYERDRDYDRYSYSDSYDEKSRDRG  | S | 138 |
| 691 | LOC_Os02g07190.1 | IKRAGIDDSISESPRTEIFKDKSA    | S | 809  |  | 692 | LOC_Os02g07210.1 | AKNSGRSLGKRLSHLDSIPHTPRVN   | S | 48  |
| 694 | LOC_Os02g07260.1 | NPKKFAAIVYGGSKVSTKIGVIESL   | S | 201  |  | 695 | LOC_Os02g07630.1 | STVSQPKLQNTISGQERTIGMTCAA   | S | 132 |
| 697 | LOC_Os02g08190.1 | AAKSSAAAAATPASTADIRHLRSIH   | S | 56   |  | 698 | LOC_Os02g08190.1 | STIWEDATDGFVPSPSRSPMPSRSP   | S | 240 |
| 700 | LOC_Os02g08350.1 | SAPKANDCNLHISGSGOTVDRDESS   | S | 718  |  | 701 | LOC_Os02g08350.1 | HTSELRNKELLVSELQSTLEDKSKR   | S | 839 |
| 703 | LOC_Os02g08360.1 | LPASKWSREDDYSDDEFRKGGRGLG   | S | 774  |  | 704 | LOC_Os02g08360.1 | RRRLQSEYGLSFSNDGANSRRSSSR   | S | 873 |
| 706 | LOC_Os02g08360.1 | RKGGRGGLGLSYSSGSDIAGDSKAD   | S | 791  |  | 707 | LOC_Os02g08360.1 | DEDRKGGRGLGLSYSSGSDIAGDSG   | S | 788 |
| 709 | LOC_Os02g08364.1 | ITQNKADYDGEOSVKGVEFAEINAA   | S | 345  |  | 710 | LOC_Os02g09740.1 | RLMORASTVRRSGGFLGYSYRAPE    | S | 696 |
| 712 | LOC_Os02g09920.1 | SPQNTLEASSTKSLDADNEMDT      | S | 422  |  | 713 | LOC_Os02g10020.1 | ECAEFPVPQVPKSTKPSILKIROAT   | S | 361 |
| 715 | LOC_Os02g10220.1 | RAQRKDRFDSVLSSTMSKCDPKGSS   | S | 245  |  | 716 | LOC_Os02g10220.1 | LSSTMSKCDPKGSSSSSEPTFEFEFQ  | S | 256 |
| 718 | LOC_Os02g10510.1 | HRDRPEKLSKLSASOGAGAPSSSTA   | S | 335  |  | 719 | LOC_Os02g10510.1 | RDRPEKLSKLSASOGAGAPSSSTARP  | S | 337 |
| 721 | LOC_Os02g10690.1 | NPSNAVKKQPKRSLPKLSEFTGPE    | S | 328  |  | 722 | LOC_Os02g10790.1 | CAENLRSANLLQSPGSSNLMNNGK    | S | 478 |
| 724 | LOC_Os02g10970.1 | SKTERADIALTSNRSKSRPILFIH    | S | 408  |  | 725 | LOC_Os02g10970.1 | ERNADIALTSNRSKSRPILFIHTSI   | S | 411 |
| 727 | LOC_Os02g10970.1 | SKRHGRKSKASSQVSGENHTALAA    | S | 345  |  | 728 | LOC_Os02g10970.1 | HGRKSKASSQVSGENHTALAAAKD    | S | 349 |
| 730 | LOC_Os02g10970.1 | SATPRSLAQEDSKPKENGJTRNGV    | S | 381  |  | 731 | LOC_Os02g11060.1 | WQJGPATSDQESPPNANGKLVNT     | S | 309 |
| 733 | LOC_Os02g11750.1 | LYDRRAEAMHNVSDNDREKENSQDY   | S | 178  |  | 734 | LOC_Os02g11750.1 | FSRPKDHSRDLVSYSSDDLHSDAKR   | S | 218 |
| 736 | LOC_Os02g11750.1 | RPKDHSRDLVSYSSDDLHSDAKRQL   | S | 220  |  | 737 | LOC_Os02g11750.1 | PKDHSRDLVSYSSDDLHSDAKRQLN   | S | 221 |
| 739 | LOC_Os02g11820.1 | DRNSRYSYGERSPGVHNDYKSP      | S | 186  |  | 740 | LOC_Os02g11820.1 | NRRSDGNWGGSRSPPNYSYSDRRS    | S | 156 |
| 742 | LOC_Os02g11820.1 | PPPQWORTSTASSIGSSEGTSEQIK   | S | 327  |  | 743 | LOC_Os02g11820.1 | RPPSEPPQRPNGSPNYQKETDGGSSP  | S | 236 |
| 745 | LOC_Os02g11820.1 | GSPNYQKETDGGSPVVRVFRDILGD   | S | 247  |  | 746 | LOC_Os02g12310.1 | TSWIMHEYRI MNSPRAVPSSSSVN   | S | 146 |
| 748 | LOC_Os02g12360.1 | QDTSAGAGKKWDSSEEDILGKYELG   | S | 641  |  | 749 | LOC_Os02g12850.1 | RDGGGAGVGDASGDDGRAPGGDSS    | S | 53  |
| 751 | LOC_Os02g13130.1 | LIINQVLEAPADAASSGNLSRRKYNAP | S | 220  |  | 752 | LOC_Os02g13130.1 | DDAGAGVGSIGSSGGGGGGRTG      | S | 96  |
| 754 | LOC_Os02g13560.1 | DI AHHAHRSALSMRRRSJLEEGGE   | S | 398  |  | 755 | LOC_Os02g14530.1 | GSRROVSNOKAVSLPSSPHRLRSDG   | S | 477 |
| 757 | LOC_Os02g14530.1 | QVSNQKAVSLPSSPHRLRSDGSGLR   | S | 481  |  | 758 | LOC_Os02g14530.1 | NWSSSHAEHLGSLITKQFRNSGS     | S | 31  |
| 760 | LOC_Os02g14530.1 | KVVEFHQRTASSPEPHLSRTBGRS    | S | 356  |  | 761 | LOC_Os02g14530.1 | ASTSNMRGRBRBSISFETPGDDIV    | S | 399 |
| 763 | LOC_Os02g14770.1 | AAAGKAAMERHOSIDAQRLIAPGK    | S | 15   |  | 764 | LOC_Os02g14780.1 | QPKQVTDWGHSGSLGRTATQALSMG   | S | 515 |
| 766 | LOC_Os02g15060.1 | SKRTCPMCRCDLSPPREVAAKEATA   | S | 151  |  | 767 | LOC_Os02g15220.1 | QQPSQEPNITGVKSPKQNLIVDEKLA  | S | 594 |
| 769 | LOC_Os02g15220.1 | VPRKNPKPPNPSPSSSPLAQTLAS    | S | 61   |  | 770 | LOC_Os02g15220.1 | KNPKPPNPSPSSSPLAQTLASIRR    | S | 64  |
| 772 | LOC_Os02g15220.1 | SPSSSPLAQTLASLRSLRRPPDGP    | S | 73   |  | 773 | LOC_Os02g15310.1 | RSRSPRYRGPBRSYSYSPAPRRRDD   | S | 163 |
| 775 | LOC_Os02g15310.1 | SPAPRRRDYASAPQRKDTTHRAKSP   | S | 179  |  | 776 | LOC_Os02g15910.1 | SNSDTKMKQGVYKMSKALVDDRTPKD  | S | 50  |
| 778 | LOC_Os02g16600.1 | ROSYSKDPNELLSPKLTPTASTSSCD  | S | 290  |  | 779 | LOC_Os02g16620.1 | AGKAHVPLSROYSVLDAKLSKIPR    | S | 209 |
| 781 | LOC_Os02g17980.1 | ILDRVERRLTASSMFLPOGGRITLI   | S | 222  |  | 782 | LOC_Os02g18660.1 | IAMPKEATTTAASDDGTLVGSKKGK   | S | 439 |
| 784 | LOC_Os02g18660.1 | IATDDDDGTIGGSKRKAAGKEELD    | S | 411  |  | 785 | LOC_Os02g18660.1 | GGDEEGEEVGGDSSESEPPPEPVKK   | S | 98  |
| 787 | LOC_Os02g18660.1 | EEGEEVEGGDSSESEPPPEPVYKKSA  | S | 101  |  | 788 | LOC_Os02g18660.1 | PPPOKPSGRGAASSDEFEFEFEEDSD  | S | 59  |
| 790 | LOC_Os02g18660.1 | SKYNYLAPESPSSKSGKALSRWTT    | S | 193  |  | 791 | LOC_Os02g18660.1 | SKYNYLAPESPSSKSGKALSRWTTD   | S | 194 |
| 793 | LOC_Os02g18910.1 | VVDVYLVYAAKASATARSFEKKVIN   | S | 56   |  | 794 | LOC_Os02g19150.1 | VKRIHCELISSRSAGCSETDSCAS    | S | 191 |
| 796 | LOC_Os02g19170.1 | PTLASMLKKVYTSKDRTAERLINAR   | S | 685  |  | 797 | LOC_Os02g19220.1 | RPLIDVEOTSESSDOWTEKSASKTL   | S | 511 |
| 799 | LOC_Os02g19420.1 | DIJLDPFLKRHAPELSBKREMFQNL   | S | 33   |  | 800 | LOC_Os02g19804.1 | KNIRKRPTAPAGSDDDDEDGSGAIA   | S | 39  |
| 802 | LOC_Os02g19860.1 | APPSRRPLKRMSSPERWFAQLJAS    | S | 419  |  | 803 | LOC_Os02g19860.1 | ELQGSRSFTDMSPVKTEKNPEGSL    | S | 483 |
| 805 | LOC_Os02g20970.1 | NESSESSEFPKLSAEYEPVDITGLIE  | S | 469  |  | 806 | LOC_Os02g20970.1 | PDDQHSPPERGESESPKRLRKA      | S | 620 |
| 808 | LOC_Os02g22090.1 | DGQTACSKNGKLDNGELNGKSGDEF   | S | 252  |  | 809 | LOC_Os02g22210.1 | KSEIATKLVQISSEFFEMKDLGAACK  | S | 835 |
| 811 | LOC_Os02g22370.1 | QAQKRNALGRQPSQETLISFEKTLPL  | S | 531  |  | 812 | LOC_Os02g23827.1 | SAKETITAVPPHESPKALLIDEVVDI  | S | 382 |
| 814 | LOC_Os02g24080.1 | SKKPSRSSNPEDSDSDGREGORPA    | S | 61   |  | 815 | LOC_Os02g24080.1 | KPSRSSNPEDSDSDGREGORPARA    | S | 63  |
| 817 | LOC_Os02g24354.1 | DGSGTAKIRRGSEDDYMKFEPDNL    | S | 477  |  | 818 | LOC_Os02g24800.1 | AAQDGSRGTSNAPSVVAPRSREAT    | S | 327 |
| 820 | LOC_Os02g25580.1 | RPRGSDGYSYSSDVLKHSSSDFEKL   | S | 590  |  | 821 | LOC_Os02g25580.1 | RRTGGTWARPRGSDGYSYSSDVLKH   | S | 582 |
| 823 | LOC_Os02g25580.1 | WARPRGSDGYSYSSDVLKHSSSDFEK  | S | 588  |  | 824 | LOC_Os02g26140.1 | PPGKVQAAAAVASKTRCTRTSPS     | S | 316 |
| 826 | LOC_Os02g26349.1 | PDAGRHKRRRDSGPAAAATHDKDDK   | S | 103  |  | 827 | LOC_Os02g28810.1 | RTLDAHTEFQFGSGRLIACITSSRPG  | S | 176 |
| 829 | LOC_Os02g28980.1 | KRKETKL YGNMISKL SKLEDSETEG | S | 602  |  | 830 | LOC_Os02g29400.1 | GGGGGEGEGTLASFSSRSSVAHGRE   | S | 20  |
| 832 | LOC_Os02g30050.1 | BATIRRLTKHQISLKTEREKKBEKV   | S | 101  |  | 833 | LOC_Os02g30140.1 | PPPSJSSSLRSLSLSSSPGRBHRG    | S | 35  |
| 835 | LOC_Os02g30230.1 | DPTGLFFSLRRLSLGSMDDJDTSSP   | S | 190  |  | 836 | LOC_Os02g30230.1 | GLFFSLRRLSLGSMDDJDTSSPEDA   | S | 193 |
| 838 | LOC_Os02g31150.1 | ERMYWSEYRNPESYPLKDSFSPV     | S | 408  |  | 839 | LOC_Os02g31150.1 | MYWSEYRNPESYPLKDSFSPVTS     | S | 410 |
| 841 | LOC_Os02g32340.1 | NAPVNYKTIVHKSNVQETFEVYCGEN  | S | 458  |  | 842 | LOC_Os02g32340.1 | NKNSWSDILNTSKSFHLPPINDENIR  | S | 556 |
| 844 | LOC_Os02g32469.1 | AKCYCAPATHAGSEFKRLHRTNSQG   | S | 66   |  | 845 | LOC_Os02g32490.1 | AGASSDKLRHVESMSFLPSGAGRIS   | S | 22  |
| 847 | LOC_Os02g32550.1 | BSRSVGGGSRSPSGDELERTSNGEG   | S | 280  |  | 848 | LOC_Os02g33320.1 | QKNHPASHDQHSJPDVAPQKSSDGG   | S | 119 |
| 850 | LOC_Os02g33320.1 | RGYQODIKDSRLSGESPVITPLRLKI  | S | 493  |  | 851 | LOC_Os02g33320.1 | QODIKDSRLSGESPVITPLRLKIORN  | S | 496 |
| 853 | LOC_Os02g33320.1 | SMVSNVSPILVSGSPQHNLPSTAE    | S | 441  |  | 854 | LOC_Os02g33320.1 | TAENKNSDPLVNSPLIGNLDSKTTT   | S | 463 |
| 856 | LOC_Os02g33360.1 | VKVVADVPGTGSSMDGEVKAAPDGS   | S | 91   |  | 857 | LOC_Os02g33610.1 | EDSETKSSGKEGFSAPRHSRSRG     | S | 670 |
| 859 | LOC_Os02g33770.1 | SEVAVITDMNKMSEFGSGGPTAEKSP  | S | 318  |  | 860 | LOC_Os02g33770.1 | AVTDMNKMSEFGSGGPTAEKSPSTP   | S | 321 |
| 862 | LOC_Os02g34080.1 | KASMVGRSFGTSSLPRGRSPSNQG    | S | 1274 |  | 863 | LOC_Os02g34500.1 | SHKDSLMOETDLSPSTASHKDSLLE   | S | 495 |
| 865 | LOC_Os02g34560.1 | VERORSFDDRSI SDVSYSGGGHGGT  | S | 50   |  | 866 | LOC_Os02g34560.1 | QSEDDBSISDVSYSGGGHGGTBGG    | S | 53  |
| 868 | LOC_Os02g34560.1 | HGTRGGFDGMVSPGGGLRSIVGTP    | S | 71   |  | 869 | LOC_Os02g34560.1 | MELAVAGGMMRSASHTSISPSDDP    | S | 13  |
| 871 | LOC_Os02g34560.1 | GAGMRRSASHTSLSESDDEDL SRL   | S | 18   |  | 872 | LOC_Os02g34560.1 | GGMRRSASHTSLSESDDEDL SRLIN  | S | 20  |
| 874 | LOC_Os02g34590.1 | DRVMEGGGAVTNSGDEMGRAYGDE    | S | 60   |  | 875 | LOC_Os02g34680.1 | HOWPRNVIYEDDSFEETEEGDNVGD   | S | 312 |
| 877 | LOC_Os02g34840.1 | AAKRRAAAGDGGPSESADDDIVAAQI  | S | 28   |  | 878 | LOC_Os02g35150.1 | GNERSDITLVTSDSDTRDMSDAW     | S | 639 |
| 880 | LOC_Os02g35150.1 | DDRWVATNSDVSDDL ETQYQBSSEF  | S | 578  |  | 881 | LOC_Os02g35190.1 | LRYNDSGGGGRSGSAGEPLLRKRTMN  | S | 53  |
| 883 | LOC_Os02g35190.1 | GGSHRAPRREGSINYDIESTDGGSG   | S | 15   |  | 884 | LOC_Os02g35690.1 | GGGGGGGREDADWSGATSTIJDAAWG  | S | 65  |
| 886 | LOC_Os02g35910.1 | LRCPWPGGLCLSRSTGDDVYGQFIVP  | S | 222  |  | 887 | LOC_Os02g36974.1 | LRDNLTLTSDISFDAAEELKEAPK    | S | 243 |
| 889 | LOC_Os02g37030.1 | GRKHCSGGGGSPSSGSSASWSSSR    | S | 143  |  | 890 | LOC_Os02g37030.1 | RKHCSSGGGGSPSSGSSASWSSSRV   | S | 145 |













|      |                  |                            |   |      |  |      |                  |                             |   |      |
|------|------------------|----------------------------|---|------|--|------|------------------|-----------------------------|---|------|
| 2242 | LOC_Os04g59460.1 | DSVLPSSKKKSLSESSSFESKRTOPS | S | 1262 |  | 2243 | LOC_Os04g59460.1 | LPSSKKKSLSESSSFESKRTOPSHLF  | S | 1265 |
| 2245 | LOC_Os04g59460.1 | SKKKSLSESSSFESKRTOPSHLFSGN | S | 1268 |  | 2246 | LOC_Os04g59460.1 | TEDANKATDVNNSSPTEPENAISK    | S | 413  |
| 2248 | LOC_Os04g59570.1 | VAARPLRSRRALSVPTCAAPPRORP  | S | 25   |  | 2249 | LOC_Os04g59624.1 | NELDFKLTVLESSEPELERKGPTEV   | S | 574  |
| 2251 | LOC_Os05g01060.1 | PQAYSHVQSPMSSPVRRARDWDLJ   | S | 388  |  | 2252 | LOC_Os05g01060.1 | QQAYSHVQSPMSSPVRRARDWDLJG   | S | 389  |
| 2254 | LOC_Os05g01350.1 | RPLPPLPRVGPSPSEFASRSSASDP  | S | 326  |  | 2255 | LOC_Os05g01540.1 | PRRRLTPPRMWSPPRRPOSIRHRS    | S | 335  |
| 2257 | LOC_Os05g01590.1 | QSNKSRERVWNSVDVEFFPCYDNL   | S | 152  |  | 2258 | LOC_Os05g01610.1 | CEIKLKNALDSDSPFNKRKRDIVSHLA | S | 495  |
| 2260 | LOC_Os05g01910.1 | VGLPGIDLDRQSESSSTFOESSYQI  | S | 127  |  | 2261 | LOC_Os05g01990.1 | SSAHGKNHTSLSDDFEETIPEKNV    | S | 267  |
| 2263 | LOC_Os05g02240.1 | HHRKLHGSPASPSPSAAATAGAKEL  | S | 457  |  | 2264 | LOC_Os05g02240.1 | LHHRKLHGSPASPSPSAAATAGAKE   | S | 456  |
| 2266 | LOC_Os05g02400.1 | SSACPKNYAAVNSDMKSYGGSSTJ   | S | 491  |  | 2267 | LOC_Os05g02500.1 | RKFTSRSLARVYSDSALIRDLDPRV   | S | 475  |
| 2269 | LOC_Os05g02500.1 | ERRGGESSIKLPSQKDLVLPVRVP   | S | 596  |  | 2270 | LOC_Os05g02650.1 | GSQGDILGNDTSSIGASSDKGPKK    | S | 434  |
| 2272 | LOC_Os05g03060.1 | AAEASRLDPAGDSPEMRVVDPDGA   | S | 51   |  | 2273 | LOC_Os05g03060.1 | SHTSESESTRSSLSFSLRNSNDHA    | S | 428  |
| 2275 | LOC_Os05g03060.1 | BSFSTRSSLSFSLRNSNDHAPTRA   | S | 432  |  | 2276 | LOC_Os05g03060.1 | DGATFEAPEQSESPKRRKAKAGVNL   | S | 73   |
| 2278 | LOC_Os05g03120.1 | AHNKDDVDGSESGPDHGAFAEKVVV  | S | 304  |  | 2279 | LOC_Os05g03120.1 | AGITPTRTTTPERSPKYTERRSPRSP  | S | 50   |
| 2281 | LOC_Os05g03120.1 | EYTNMIGGKLASSPSPDEPFEEESP  | S | 571  |  | 2282 | LOC_Os05g03120.1 | YTNMIGGKLASSPSPDEPFEEESPK   | S | 572  |
| 2284 | LOC_Os05g03120.1 | GGGIGRNVERTGSLPEAFYTNMIG   | S | 554  |  | 2285 | LOC_Os05g03190.1 | DKESNLDRASAKSASINLGEGETIK   | S | 286  |
| 2287 | LOC_Os05g03320.1 | VKSMISGENSDESGDSKSDTVFWD   | S | 24   |  | 2288 | LOC_Os05g03320.1 | TDAYKSMISGENSDESGDSKSDTV    | S | 21   |
| 2290 | LOC_Os05g03440.1 | KDAAAAAETAAPSPRKSQKASAAAE  | S | 268  |  | 2291 | LOC_Os05g03630.1 | RLAMKHHDPKNSRPHADDSFKQVS    | S | 38   |
| 2293 | LOC_Os05g03630.1 | RAPGAGEPGGGSPRAGETSATKAP   | S | 132  |  | 2294 | LOC_Os05g03740.1 | RRKAAAAARRGTGTGAVGEGVFAM    | S | 235  |
| 2296 | LOC_Os05g03760.1 | RIJLKSAPVSPSSSPKKSASPPSP   | S | 173  |  | 2297 | LOC_Os05g03760.1 | IJLKSAPVSPSSSPKKSASPPSPPP   | S | 174  |
| 2299 | LOC_Os05g03760.1 | QGDPLHKLRKSAFAFRGQSAWPVA   | S | 551  |  | 2300 | LOC_Os05g03760.1 | SSRASAFKRSGSFIDRGGRAPAAAR   | S | 498  |
| 2302 | LOC_Os05g03780.1 | PQATVPRMDLSSSTSVAAQNKVCRG  | S | 21   |  | 2303 | LOC_Os05g03820.1 | KEGKPNVYLSLRHUTDTDNBSG      | S | 271  |
| 2305 | LOC_Os05g05230.1 | RPDGSELPKGESDDCSQISGLKVE   | S | 377  |  | 2306 | LOC_Os05g05240.1 | PKLTHPLPPVNSPSSSPFRAMDAT    | S | 849  |
| 2308 | LOC_Os05g05240.1 | AVGDLGCLVRQJSLDOFENESRBMH  | S | 501  |  | 2309 | LOC_Os05g05300.1 | GTTEIKEPHDQSDSDQDELDRFI     | S | 331  |
| 2311 | LOC_Os05g05300.1 | DPVAMASIQRVASTEFFRIDEQOGT  | S | 294  |  | 2312 | LOC_Os05g05300.1 | EKPRNSATAGRSVFRESDEDELDT    | S | 488  |
| 2314 | LOC_Os05g05480.1 | RGLAVDFEKSQVSDDEFDLEDFKLN  | S | 93   |  | 2315 | LOC_Os05g05590.1 | EGGRGEVFPVPGSPVFRSITHGSQIG  | S | 524  |
| 2317 | LOC_Os05g05720.1 | SNTRSSVATGRSPSPNSSSLAPLN   | S | 94   |  | 2318 | LOC_Os05g05720.1 | TRSSVATGRSPSPNSSSLAPLNEN    | S | 96   |
| 2320 | LOC_Os05g05950.1 | IMKELSGGSASVSPVSGSSSREYTT  | S | 471  |  | 2321 | LOC_Os05g05950.1 | AAKQIMKELSGGSASVSPVSGSSS    | S | 467  |
| 2323 | LOC_Os05g05950.1 | TNSMDGQIVLDDSEEDGDDDDNEDD  | S | 495  |  | 2324 | LOC_Os05g06280.1 | ANLQEEEEKVTKVSPPRKKAYRDDKP  | S | 639  |
| 2326 | LOC_Os05g06760.1 | VORCRARINRLASASSGDAAFEFEL  | S | 122  |  | 2327 | LOC_Os05g06980.1 | SRAQITTEDDQKSSGNTSVENTEGLK  | S | 247  |
| 2329 | LOC_Os05g07000.1 | SNERYDGTTRYVASPSYGRDRSPGGN | S | 238  |  | 2330 | LOC_Os05g07000.1 | RSNLTSDGAINPSPRERDQNGSHR    | S | 269  |
| 2332 | LOC_Os05g07130.1 | KKLQVSGIVFESKSYDTLTLOKQDG  | S | 298  |  | 2333 | LOC_Os05g07130.1 | HNNCKDNVALPSDSFKKLQVSGIV    | S | 282  |
| 2335 | LOC_Os05g07220.1 | KONWADSDVFNQSLSRSSDFEKFSRE | S | 235  |  | 2336 | LOC_Os05g07220.1 | QSGGAVKONWADSDVFNQSLSRSSD   | S | 229  |
| 2338 | LOC_Os05g07680.1 | KNMRCHEFNAGSELSEHEFEKQOVS  | S | 214  |  | 2339 | LOC_Os05g07680.1 | SELSEHEFEKQOVSIVTSSLOKDL    | S | 226  |
| 2341 | LOC_Os05g08370.1 | TQRQGEDVDLSSSRHQRHPTRLT    | S | 141  |  | 2342 | LOC_Os05g08370.1 | QROGEDVDLSSSRHQRHPTRLTS     | S | 142  |
| 2344 | LOC_Os05g08790.1 | AKGETILRRQTSASGYRLTELAEI   | S | 687  |  | 2345 | LOC_Os05g08840.1 | KMDTDDALGDPASGTDENMQESKCS   | S | 526  |
| 2347 | LOC_Os05g09540.1 | PAASVPPWRLAFSLCBFLDLPADGS  | S | 86   |  | 2348 | LOC_Os05g09630.1 | NIMLSRPETRSESEFPGLVSLIDN    | S | 581  |
| 2350 | LOC_Os05g10730.1 | AEQYQVPLIQONSEAFITGNIKSVY  | S | 888  |  | 2351 | LOC_Os05g10770.1 | RPPIDYSRFEHTSDSDSIVEIVEKD   | S | 98   |
| 2353 | LOC_Os05g11370.1 | KVPGEDFDKLESDSDCKEVAALSA   | S | 197  |  | 2354 | LOC_Os05g11370.1 | POGEDFDKLESDSDCKEVAALSA     | S | 199  |
| 2356 | LOC_Os05g11770.1 | EDIVESVMMLGGSKDTELDAEPER   | S | 757  |  | 2357 | LOC_Os05g11770.1 | IVESVMMLGGSKDTELDAEPERTA    | S | 759  |
| 2359 | LOC_Os05g11770.1 | TVCLSNHDEKNESPPADSYNHLIR   | S | 648  |  | 2360 | LOC_Os05g11770.1 | EPSQDEPKLVCCSEQLDKTHGSENA   | S | 551  |
| 2362 | LOC_Os05g12100.1 | SVQHCHRAOHTTSTPRRPAACPEGDE | S | 133  |  | 2363 | LOC_Os05g12680.1 | LEDLNEGVPRGHRSVFGSYSSSDYD   | S | 592  |
| 2365 | LOC_Os05g15190.1 | DCSDLSPPKSSSSGGSHRSRECRP   | S | 264  |  | 2366 | LOC_Os05g18770.1 | SSVDKITDKKLSHTIRGESVIGKS    | S | 67   |
| 2368 | LOC_Os05g18774.1 | JHFKEVPEDEDCSDDEPPGGGGRRS  | S | 84   |  | 2369 | LOC_Os05g22670.1 | PPQLTKDELMMSSGKRKRDEYPCQL   | S | 204  |
| 2371 | LOC_Os05g22920.1 | RRELIDGVLAEESPPPGSLGKTLIS  | S | 53   |  | 2372 | LOC_Os05g22940.1 | TKLSELRLARTARSLELMEITEESK   | S | 1200 |
| 2374 | LOC_Os05g22990.1 | KVSEPTTGPSPAKSDPVGNQETGKSO | S | 722  |  | 2375 | LOC_Os05g22990.1 | TVNLIKATDNPSSSMDGLTVQRTLLP  | S | 790  |
| 2377 | LOC_Os05g23320.1 | PTPLROKYSRMSSLENNKRTMAART  | S | 550  |  | 2378 | LOC_Os05g23610.1 | QDDDPEAKESRLSEKHEHRAHYDEP   | S | 106  |
| 2380 | LOC_Os05g23610.1 | SKTDPKDDGWASSDDADAMEQDD    | S | 84   |  | 2381 | LOC_Os05g23610.1 | SKTDPKDDGWASSDDADAMEQDD     | S | 85   |
| 2383 | LOC_Os05g23610.1 | PYHPMVDNDGSLSPTRPDKCLDET   | S | 44   |  | 2384 | LOC_Os05g23840.1 | PPRNPITPRDPSPPMFATAEALTR    | S | 49   |
| 2386 | LOC_Os05g26890.1 | SOVESDPSKVVLSPPDNQETGKLS   | S | 73   |  | 2387 | LOC_Os05g27820.1 | MSMIEATALLSSSEFKEDSVYASA    | S | 44   |
| 2389 | LOC_Os05g27820.1 | SI MEATALLSSSEFKEDSVYASALP | S | 46   |  | 2390 | LOC_Os05g27820.1 | TAILRSSSEFKEDSVYASALPASDLR  | S | 51   |
| 2392 | LOC_Os05g28190.1 | SEPKDADNKGSSSPTEPSEFNKL    | S | 246  |  | 2393 | LOC_Os05g28190.1 | EOKDADNKGSSSPTEPSEFNKSL     | S | 248  |
| 2395 | LOC_Os05g28190.1 | LKGSDEKAKSSDSEPPSQPVETTD   | S | 152  |  | 2396 | LOC_Os05g28190.1 | ETTDEAKLGGGSVAGFAKEDNSS     | S | 173  |
| 2398 | LOC_Os05g28190.1 | AETPEKGDLSKGSDEKAKSSDSETP  | S | 143  |  | 2399 | LOC_Os05g28190.1 | GSDLKGSDEKAKSSDSETPSQPVF    | S | 149  |
| 2401 | LOC_Os05g28280.1 | TSHSLQELQPTKSLFDNAETKAWLA  | S | 344  |  | 2402 | LOC_Os05g28860.1 | LOKLEKGTGGISGLSKKTLGAGLN    | S | 500  |
| 2404 | LOC_Os05g29010.1 | ELHDKWQGNRRSSLSKEDVNAWRPE  | S | 101  |  | 2405 | LOC_Os05g30240.1 | QAPGNHALQGNSEFNARRGOVFGPN   | S | 852  |
| 2407 | LOC_Os05g30340.1 | PKRLRVSVKRESGAHSESVAPT     | S | 388  |  | 2408 | LOC_Os05g30420.1 | ARAPVDEFFPVDSGDSLSDILKSA    | S | 110  |
| 2410 | LOC_Os05g30420.1 | EPFEPVDSGDSLSDILKSAIGKQRR  | S | 116  |  | 2411 | LOC_Os05g30510.1 | GGPQSSAAAAASSGXGVAANVDR     | S | 48   |
| 2413 | LOC_Os05g31920.1 | ETKSNAQLSRLSSLESFKHMDSRIS  | S | 763  |  | 2414 | LOC_Os05g31920.1 | BSRSDMLSSGTTSPRTYVTRSSPLS   | S | 150  |
| 2416 | LOC_Os05g32070.1 | RRRERQOLAGAAASPTTSAPPAAT   | S | 161  |  | 2417 | LOC_Os05g32070.1 | SRTSTSNATTPRSEDTSSSHQVASF   | S | 204  |
| 2419 | LOC_Os05g32580.1 | PEEEEEEDRLFGSDNEDYVKPTPARS | S | 118  |  | 2420 | LOC_Os05g32600.1 | KLADFGLARTFGSPERNETHOVEAR   | S | 168  |
| 2422 | LOC_Os05g32760.1 | IQPEDEKQVYPASPPRPPI SPPTPV | S | 269  |  | 2423 | LOC_Os05g32760.1 | KVYPASPPRPPI SPPTPYAAPAPQF  | S | 276  |
| 2425 | LOC_Os05g33100.1 | PPFVVQPFQVLSKSGIGHFVKITF   | S | 190  |  | 2426 | LOC_Os05g33100.1 | VYKQFQVLSKSGIGHFVKITFPFV    | S | 193  |
| 2428 | LOC_Os05g33310.1 | RPSTPVDLSPLPSPTKAMTIIQAPP  | S | 247  |  | 2429 | LOC_Os05g33440.1 | MDLLRPLORSNTEFFERFVRKYFED   | S | 362  |
| 2431 | LOC_Os05g34500.1 | HQQQQOPHRRNLSLELAGVGLSP    | S | 71   |  | 2432 | LOC_Os05g34500.1 | LSLELAGVGLSPGRRI PRVALPK    | S | 82   |
| 2434 | LOC_Os05g34780.1 | AENITPEDESIDSSFDNTDSTMERK  | S | 339  |  | 2435 | LOC_Os05g34780.1 | ENITPEDESIDSSFDNTDSTMERKS   | S | 340  |
| 2437 | LOC_Os05g34790.1 | HGKSGDMTVLDSGDESDHGTROHE   | S | 156  |  | 2438 | LOC_Os05g34790.1 | SGDMTVLDSGDESDHGTROHEAKP    | S | 159  |
| 2440 | LOC_Os05g36090.1 | GRSASDVLRRSASGHEAAPFOTET   | S | 416  |  | 2441 | LOC_Os05g36090.1 | EVRVRHSSWDRBSGNWMSLDVIGR    | S | 393  |
| 2443 | LOC_Os05g37434.1 | RPLDGLDPQVGSQNKTSPTKHSI    | S | 125  |  | 2444 | LOC_Os05g37434.1 | LDPQVGSQNKTSPTKHSIAPPNM     | S | 131  |
| 2446 | LOC_Os05g37500.1 | VSKVQEPKOKIASPTSSQSVLSGG   | S | 738  |  | 2447 | LOC_Os05g37720.1 | GREEDDELGAELSGMBLLRYLYVRT   | S | 141  |
| 2449 | LOC_Os05g37930.1 | PEKAAVAARSDDSEDFCLAGLSRR   | S | 39   |  | 2450 | LOC_Os05g38150.1 | GRQRLRYRKL VNSSFADLQKQOMEL  | S | 78   |
| 2452 | LOC_Os05g38710.1 | DVSNEDMLETASPSGKVDYTFKSC   | S | 509  |  | 2453 | LOC_Os05g38710.1 | ASCEPEPPARSKSDGDLVYGKGRP    | S | 119  |
| 2455 | LOC_Os05g38810.1 | TRRAASQITGSSSVTKSONEQVPHK  | S | 563  |  | 2456 | LOC_Os05g38810.1 | SEKIGECTTRRAASQITGSSSVTKSQ  | S | 556  |
| 2458 | LOC_Os05g38810.1 | NIAETENGDFDYSSDDAINELSVFK  | S | 588  |  | 2459 | LOC_Os05g38810.1 | IAETENGDFDYSSDDAINELSVFK    | S | 589  |
| 2461 | LOC_Os05g38810.1 | DGLQSKKKRSLDSEFPETKAAAPAS  | S | 528  |  | 2462 | LOC_Os05g38810.1 | KPDGLELTKKSTSNLSDTNAYDTH    | S | 490  |
| 2464 | LOC_Os05g38810.1 | LELTKKSTSNLSDTNAYDHPAERO   | S | 495  |  | 2465 | LOC_Os05g38810.1 | SEFDPETKAAAPSEGSSEKTEGECTR  | S | 540  |

|      |                  |                               |   |     |  |      |                  |                                |   |      |
|------|------------------|-------------------------------|---|-----|--|------|------------------|--------------------------------|---|------|
| 2467 | LOC Os05g38810.1 | PETKAAAPSGSSFKTIGECIRRAAS     | S | 544 |  | 2468 | LOC Os05g38830.1 | TSGSGVMTERVPSFSRKKPKVDRON      | S | 125  |
| 2470 | LOC Os05g38950.1 | TSQOKALI SPLSPSPRTSMIDASPGR   | S | 703 |  | 2471 | LOC Os05g38950.1 | PI PSPRTSMIDASPEGRANHSSQFEP    | S | 712  |
| 2473 | LOC Os05g38950.1 | QVETPKLI DVLEESMGSPKEDNKSRY   | S | 786 |  | 2474 | LOC Os05g38950.1 | VHPVKVQEGKI SEDSDDEYDVOK       | S | 143  |
| 2476 | LOC Os05g39390.1 | BREKVQAVEKRI SSDPYGTRVHDYI    | S | 61  |  | 2477 | LOC Os05g39390.1 | REKVQAVEKRI SSDPYGTRVHDYI      | S | 62   |
| 2479 | LOC Os05g39730.1 | PATSRISLEKRYSEI QSEERRFEVS    | S | 309 |  | 2480 | LOC Os05g39730.1 | IFIMESPSAPRRSPGSPPLGGSPTM      | S | 521  |
| 2482 | LOC Os05g39730.1 | PRRSPGSPPLGGSPTMGDRTMKAPT     | S | 530 |  | 2483 | LOC Os05g39840.1 | I/GQIL SOKYDAL SPLRTHDGASRR    | S | 503  |
| 2485 | LOC Os05g40420.1 | AVGLPSDDDMGNSVEVGHNAI GAGRI   | S | 81  |  | 2486 | LOC Os05g41100.1 | KKKDI LAGSDNESDGGGGPEPI SKI    | S | 22   |
| 2488 | LOC Os05g41100.1 | EKKYSPDDIOEYSDDEEHL IQEDFY    | S | 285 |  | 2489 | LOC Os05g41100.1 | RPYLETGSEKKYSPDDIOEYSDDEE      | S | 277  |
| 2491 | LOC Os05g41480.1 | QKKTSQADFEAGSL IQERDGHSDRK    | S | 337 |  | 2492 | LOC Os05g41480.1 | QAL KAKEAQKTSQADFEAGSL IQE     | S | 329  |
| 2494 | LOC Os05g41510.1 | ADFEFEEDERESDDERKKKRRKKK      | S | 74  |  | 2495 | LOC Os05g41670.1 | NDDEFEFPHMGSSSHGGDRTKNRSI      | S | 222  |
| 2497 | LOC Os05g41790.1 | PDSNALSSQREFGSSSPGGDMKNKTR    | S | 109 |  | 2498 | LOC Os05g41790.1 | SNALSSQREFGSSSPGGDMKNKTRKR     | S | 111  |
| 2500 | LOC Os05g42220.1 | ITENESGKIKKSQSL GDMLEMEKLYD   | S | 80  |  | 2501 | LOC Os05g42230.1 | IAGGAAAAIOPNSPREFFESSLAAS      | S | 38   |
| 2503 | LOC Os05g42300.1 | GENDEQDTPESSDDEKFAEYKRSI      | S | 379 |  | 2504 | LOC Os05g42300.1 | NMKEL YAKGYDGSFGNDEQDTPPEF     | S | 366  |
| 2506 | LOC Os05g43280.1 | RDEDRSLSGESLSEWRSCEQVSES      | S | 30  |  | 2507 | LOC Os05g43280.1 | STAGMRDEDRSLSGESLSEWRSCEQ      | S | 25   |
| 2509 | LOC Os05g43380.1 | KRELITGADLDHSEDEQDPIVERSP     | S | 231 |  | 2510 | LOC Os05g43380.1 | HSDEQDPIVERSPRI QSPISKESS      | S | 242  |
| 2512 | LOC Os05g43520.1 | ETKSLAIEPKTHSETDEDEYDFWD      | S | 375 |  | 2513 | LOC Os05g43520.1 | EEGRDGEFEESAQSPRIAGIRSDIAE     | S | 111  |
| 2515 | LOC Os05g43530.1 | YEWVYTKSGRSGSEGGI YGI VEKHS   | S | 593 |  | 2516 | LOC Os05g43670.1 | EEFEEDDDEAPASI PPPPRRARAPP     | S | 188  |
| 2518 | LOC Os05g43860.1 | SRDMVPI PPI PMSKSPSPSWI SRA   | S | 510 |  | 2519 | LOC Os05g43950.1 | VSPASSI QXNSOGQNEPNSDPPS       | S | 93   |
| 2521 | LOC Os05g44310.1 | KSAVSVALNRQTSMDLI TKPI DEFS   | S | 458 |  | 2522 | LOC Os05g44320.1 | DAGALDI DDDEDSDFEFGDQOQTRG     | S | 681  |
| 2524 | LOC Os05g44380.1 | AAASELLIPVASSSPSRGAAAAASR     | S | 87  |  | 2525 | LOC Os05g44380.1 | ASELLIPVASSSPSRGAAAAASRSP      | S | 89   |
| 2527 | LOC Os05g44922.1 | DSEYPNIRALRNASSVSI ADAAYVKI   | S | 71  |  | 2528 | LOC Os05g44922.1 | PNIRALRNASSVSI ADAAYVKI SEG    | S | 74   |
| 2530 | LOC Os05g45060.1 | VPRVITFVADDSDPGSSSRGGAGGG     | S | 86  |  | 2531 | LOC Os05g45280.1 | MGDEKSL SOMGSRDRDRF LIPVS      | S | 13   |
| 2533 | LOC Os05g45930.1 | NIAQVEYVGRGENSSLQGEVVYRDVS    | S | 76  |  | 2534 | LOC Os05g45930.1 | BAVOEYVGRGENSSLQGEVVYRDVSQ     | S | 77   |
| 2536 | LOC Os05g45930.1 | NDMEQRSKPEPI STESI KSKKRRSS   | S | 457 |  | 2537 | LOC Os05g45930.1 | EQRSKPEPI STESI KSKKRRSSPST    | S | 460  |
| 2539 | LOC Os05g45930.1 | GKDAGFESSPVISPEVLYPHNFA       | S | 54  |  | 2540 | LOC Os05g45930.1 | SSLQGEVVYRDVSQDI EKONTVUSD     | S | 88   |
| 2542 | LOC Os05g46340.1 | KERQQL QIRI NSLI NYKFWI NRGS  | S | 361 |  | 2543 | LOC Os05g46490.1 | DVDEYPHEDHNSAKHGSKENAIVA       | S | 218  |
| 2545 | LOC Os05g46560.1 | AFTEADEAKELI SPLIKPGNAVYRI    | S | 146 |  | 2546 | LOC Os05g46620.1 | EQGAKSLYHRENSI QVETSPRGAA      | S | 323  |
| 2548 | LOC Os05g47470.1 | FEDEEAAPATPSKEAEVGYHGLMA      | S | 178 |  | 2549 | LOC Os05g48020.1 | IGEGLETI KMASDMNEELDROQVPI     | S | 198  |
| 2551 | LOC Os05g48260.1 | ERDVEAAVVPVPSAGRI FRETNFN     | S | 93  |  | 2552 | LOC Os05g48260.1 | TPSPSSILRKRVI SITDSSRDRSGSP    | S | 39   |
| 2554 | LOC Os05g48820.1 | QKDVDDAERDEDSKCDADDPDGDO      | S | 910 |  | 2555 | LOC Os05g49050.1 | DGILAPHSHEPI YSPGDFSKRAPPII    | S | 62   |
| 2557 | LOC Os05g49180.1 | VRGGAORDEGNSSEFHSSSDNVASR     | S | 112 |  | 2558 | LOC Os05g49180.1 | DRGGRNSSEFHSSSDNVASRSISGP      | S | 117  |
| 2560 | LOC Os05g49230.1 | DSENFDIQITREYSDEEMSDPEEQOR    | S | 441 |  | 2561 | LOC Os05g49230.1 | IQITREYSDEEMSDPEEQORYDAQIE     | S | 447  |
| 2563 | LOC Os05g50280.1 | AGGGGGMGSLGSSAYSI RDSSYSVA    | S | 50  |  | 2564 | LOC Os05g50280.1 | GGGGGGMGSLGSSAYSI RDSSYSVA     | S | 51   |
| 2566 | LOC Os05g50480.1 | GDSEVAASVNSDNRDTHIEYENKOT     | S | 457 |  | 2567 | LOC Os05g50480.1 | VAASVNSDNRDTHIEYENKOT          | S | 461  |
| 2569 | LOC Os05g50480.1 | PAADHEVASSTKSDTENVYDAPYQQ     | S | 488 |  | 2570 | LOC Os05g50480.1 | TPYGLGHEHRNPDSGNI SSAAAAAQ     | S | 841  |
| 2572 | LOC Os05g50530.1 | RNI PKPIDPTESYSRGKRRAVASAI    | S | 179 |  | 2573 | LOC Os05g50530.1 | TESYSRGKRRAVASI TESSPNI DARA   | S | 189  |
| 2575 | LOC Os05g50530.1 | SRGKRRAVASI TESSPNI DARA KIDA | S | 193 |  | 2576 | LOC Os05g51500.1 | APAPVEPDAAKSAFEDDDI DEDES      | S | 47   |
| 2578 | LOC Os05g51500.1 | BEFEDEDEWDAKSDWDDI DNVN PKTS  | S | 525 |  | 2579 | LOC Os05g51630.1 | RRNTPAQSGKSGSDTI SILPETVHER    | S | 754  |
| 2581 | LOC Os05g51830.1 | KRKVAEIVLTKTPSSDKKAKIATPSG    | S | 218 |  | 2582 | LOC Os05g51830.1 | RKVAEIVLTKTPSSDKKAKIATPSGQ     | S | 219  |
| 2584 | LOC Os05g51850.1 | ETRPADAGGVVVSFEKTSIDPVFAG     | S | 504 |  | 2585 | LOC Os05g51850.1 | AVONGGEVRLI LIDGASSMGNRPGG     | S | 376  |
| 2587 | LOC Os05g51850.1 | GEVRLI LIDGASSMGNRPGSPRKE     | S | 381 |  | 2588 | LOC Os05g51850.1 | AAAASPVAPPPASPI KRGVGRPRNK     | S | 250  |
| 2590 | LOC Os06g01400.1 | KPEYKMDIQKKI SEEDQI SSII EH   | S | 721 |  | 2591 | LOC Os06g01650.1 | PSSTIALRESSAPPPVSQDPIPVQS      | S | 1070 |
| 2593 | LOC Os06g01680.1 | ILTKSTDNKSGSEFGLIHGSSDRSH     | S | 616 |  | 2594 | LOC Os06g01680.1 | ISDGAVQNI LPISTPHKI DVASTHP    | S | 511  |
| 2596 | LOC Os06g01680.1 | NAEYFKKI QPGSSNTSILEPKV IDAT  | S | 305 |  | 2597 | LOC Os06g01700.1 | DDSDVEPRSDDESDEDDDDDDQTEA      | S | 123  |
| 2599 | LOC Os06g01700.1 | DKIYVPREIDADDSDPEPRSDDESDE    | S | 113 |  | 2600 | LOC Os06g02028.1 | LIITYDEADCESSEYDNI NKRIIAY     | S | 110  |
| 2602 | LOC Os06g02160.1 | KAYGISRMNIVPSIMETLILPSILEKN   | S | 299 |  | 2603 | LOC Os06g02160.1 | NIYPSIMETLILPSILEKNI SWGHNPV   | S | 307  |
| 2605 | LOC Os06g02170.1 | DSPHQAQSPI SPISALBRHYKSI SFS  | S | 92  |  | 2606 | LOC Os06g02170.1 | DSSHRAI LILIPDSPHQAQSPI SPISA  | S | 81   |
| 2608 | LOC Os06g02180.1 | LISMRSQAMTRSDQDWHNRWIF        | S | 240 |  | 2609 | LOC Os06g02370.1 | EKRI GMFKGEGMSAVADSGEGRGV      | S | 573  |
| 2611 | LOC Os06g02380.1 | QKVGAEIVYRALSYPLIKI IAKNAGV   | S | 505 |  | 2612 | LOC Os06g03676.1 | ASDQSL EKEFDI SDSDEATDESNE     | S | 504  |
| 2614 | LOC Os06g03910.1 | IYEMAKREGILPSSPTTSRRRGSSS     | S | 309 |  | 2615 | LOC Os06g03910.1 | YEMAKREGILPSSPTTSRRRGSSSS      | S | 310  |
| 2617 | LOC Os06g04560.1 | SAAGGGAAYRRTSSGPI PSAGGGGGGR  | S | 32  |  | 2618 | LOC Os06g04560.1 | SGKITPGEDSL MSHSRNSOPREQSN     | S | 608  |
| 2620 | LOC Os06g04940.1 | ADKKTLSI LARKHSEFEGAPPHI KNTS | S | 113 |  | 2621 | LOC Os06g05000.1 | ADKKTLSI LARKHSEFEGAPPHI KNTS  | S | 89   |
| 2623 | LOC Os06g05190.1 | HNDKHKHSGSPSDDAQYDSDDTIE      | S | 315 |  | 2624 | LOC Os06g05190.1 | QSKPRSDDAQYDSDDTIE TIEFEFID    | S | 322  |
| 2626 | LOC Os06g05310.1 | REVTPILPMGYDMSQORRRTF I LAG   | S | 229 |  | 2627 | LOC Os06g05530.1 | GLIAGGTARGSPSIEDPAL VRSS       | S | 87   |
| 2629 | LOC Os06g05660.1 | INASIPAAAAI SAEDRAGI VNAL K   | S | 25  |  | 2630 | LOC Os06g05740.1 | ILKSMEGTPGAPSMKMYSRDIL MN      | S | 213  |
| 2632 | LOC Os06g06014.1 | QENNVDAVEKTLISSEDDVAEKEIDYE   | S | 271 |  | 2633 | LOC Os06g06014.1 | REESGPEWPI APSPPASPITWHNKK     | S | 81   |
| 2635 | LOC Os06g06770.1 | RNI QVALIYVEPGSPVKRPI YQGRPP  | S | 110 |  | 2636 | LOC Os06g06830.1 | DRSAPHATEGASSSRVSPQHGRGNO      | S | 124  |
| 2638 | LOC Os06g07350.1 | PAAPPGAERTI YPSMDPQRMGAL VKS  | S | 370 |  | 2639 | LOC Os06g07820.1 | QSPDDRVL IKTBSQSDI DQWVFAKS    | S | 268  |
| 2641 | LOC Os06g07840.1 | KEKQQWQVYTKSELGKASSYHATD      | S | 36  |  | 2642 | LOC Os06g08023.1 | DEPIL TKCDGYKNSI LPSMAKIL KLN  | S | 176  |
| 2644 | LOC Os06g08280.1 | GSRGVGMGVGDPPSSPARAGAAAFFE    | S | 15  |  | 2645 | LOC Os06g08280.1 | SRGVGMGVGDPPSSPARAGAAAFFEE     | S | 16   |
| 2647 | LOC Os06g08280.1 | GQMRI ISVPRVASRGLI MRKVEAVD   | S | 70  |  | 2648 | LOC Os06g08480.1 | GFEETKPDASEFTSSSGSKKKPKVK      | S | 19   |
| 2650 | LOC Os06g08480.1 | ETKPDASEFTSSSGSKKKPKVKRYI     | S | 21  |  | 2651 | LOC Os06g08480.1 | KPDASEFTSSSGSKKKPKVKRYI I      | S | 23   |
| 2653 | LOC Os06g08550.1 | VWVSYTYNRKSAASDEIVFARKNSQ     | S | 191 |  | 2654 | LOC Os06g08550.1 | VWVSYTYNRKSAASDEIVFARKNSQP     | S | 192  |
| 2656 | LOC Os06g08740.1 | PSPIGLIRIRKSPSLILDI TQMRI SOA | S | 89  |  | 2657 | LOC Os06g08740.1 | TSDEPSI MARVDISI CQI LOKDTPPV  | S | 453  |
| 2659 | LOC Os06g08740.1 | DEHEI SGFESGSI SPACGSSWSAKTE  | S | 320 |  | 2660 | LOC Os06g08790.1 | DDVYKRRDGAESDAEDPFAEFCRV       | S | 153  |
| 2662 | LOC Os06g08840.1 | PRRSYSPARARSYSRSPQVNRGRD      | S | 159 |  | 2663 | LOC Os06g08840.1 | RRSYSPARARSYSRSPQVNRGRDES      | S | 161  |
| 2665 | LOC Os06g08840.1 | PBYRRSPSYGRRSPSPAGRSPPRRS     | S | 139 |  | 2666 | LOC Os06g08840.1 | SYGRRSPSPAGRSPPRRSPAPARAR      | S | 146  |
| 2668 | LOC Os06g08850.1 | SPFSRRSPEDIGSPEHSI VILNAVYK   | S | 648 |  | 2669 | LOC Os06g09570.1 | RTFETTYNRGROL SSMGFDPPRAALDR   | S | 551  |
| 2671 | LOC Os06g09570.1 | GKRREPSI SRAASDGDMDIDJGQOS    | S | 582 |  | 2672 | LOC Os06g09930.1 | EKRSL PTL TREKSQOE NELS I LVD  | S | 305  |
| 2674 | LOC Os06g10710.1 | RRPAARAPNPSI SPRGGGGA PSRKKS  | S | 58  |  | 2675 | LOC Os06g11380.1 | TDYVIL TKEEGGSI TRNPETAFAEDA   | S | 330  |
| 2677 | LOC Os06g11610.1 | GAPILRRYDVYDSEDTGSDYEDVATD    | S | 77  |  | 2678 | LOC Os06g11970.1 | IMESPSGRIL SHESGRRRI EDVIL TRY | S | 58   |
| 2680 | LOC Os06g12030.1 | VEDEKNEGSESTSGNGTGSNAEPKS     | S | 182 |  | 2681 | LOC Os06g12030.1 | EKNVAVTEGSTNSFEKQDQEDIL IRR    | S | 20   |
| 2683 | LOC Os06g12160.1 | VPHNIRI SPLTSSILKRI YVGLI KAR | S | 512 |  | 2684 | LOC Os06g12260.1 | ASLDAGGNADASPAAPAL RPAAVA      | S | 78   |
| 2686 | LOC Os06g12400.1 | KQTDASDLSDDSDANDYDPTI AQG     | S | 349 |  | 2687 | LOC Os06g12400.1 | KSAEKLIPGL ENSDFAARKVAQREI     | S | 773  |
| 2689 | LOC Os06g12580.1 | PQOQESYSGSEYSGYGRKRQPAESYVG   | S | 225 |  | 2690 | LOC Os06g12610.1 | PKKADGVTRDRDESPGNRGAVPRDAF     | S | 386  |





















|     |                  |                            |   |      |  |  |      |                  |                            |   |     |
|-----|------------------|----------------------------|---|------|--|--|------|------------------|----------------------------|---|-----|
| 723 | LOC_Os02g10920.1 | SGAVRASRPWGKSDWICTRSGCNE   | S | 132  |  |  | 4941 | LOC_Os08g02690.1 | DTDACLDRNDPNYDSDEFPYELVEA  | Y | 116 |
| 726 | LOC_Os02g10970.1 | DDKSKRHHGRKSKASSOVSGENHT   | S | 342  |  |  | 4944 | LOC_Os08g17120.1 | SAPAKFATKISDYERTLKKAASSRKS | Y | 508 |
| 729 | LOC_Os02g10970.1 | KRHHRGRKSKASSOVSGENHTALAA  | S | 346  |  |  | 4947 | LOC_Os09g28220.1 | PYRSRRDRSPSPYDRRRROWSPYHR  | Y | 62  |
| 732 | LOC_Os02g11750.1 | NDRVKMSEKELQSLIDDAMGEYDIG  | S | 314  |  |  | 4950 | LOC_Os09g33980.1 | PRRSIRGQRLHPYQESFDDQESSEE  | Y | 155 |
| 735 | LOC_Os02g11750.1 | SRDLVYSSDDLHSDAKRQINKATQM  | S | 226  |  |  | 4953 | LOC_Os10g20600.1 | ANYVERQNSEISYYADDFDANRKKY  | Y | 258 |
| 738 | LOC_Os02g11780.1 | AEKIVSEADLPSSODKSESKLESFK  | S | 615  |  |  | 4956 | LOC_Os11g01836.1 | VGDKSHPLSDQIVYKKIDELGLEMKT | Y | 539 |
| 741 | LOC_Os02g11820.1 | SENRRSDGNWGGSRSPPNYSVSDR   | S | 154  |  |  | 4959 | LOC_Os11g44880.1 | ESKOYGRSAPLKYGGIJKPSMSGKH  | Y | 184 |
| 744 | LOC_Os02g11820.1 | NGSPNYQKETDGSSPVVPVRDILG   | S | 246  |  |  | 4962 | LOC_Os12g06850.1 | RSYQNAQVSDKVSPPSPORHNGLSS  | Y | 215 |
| 747 | LOC_Os02g12360.1 | DDITSGAGKKWDSSFEEDIDGVKEL  | S | 640  |  |  | 4965 | LOC_Os12g41920.1 | TASGKLIKVNKKYRIAPSSSISEGR  | Y | 182 |
| 750 | LOC_Os02g13130.1 | DHYSSKRKYDDPSPPPRRTGESSAP  | S | 16   |  |  |      |                  |                            |   |     |
| 753 | LOC_Os02g13170.1 | KEILLKDYARANSTEYSTIKDRIYK  | S | 419  |  |  |      |                  |                            |   |     |
| 756 | LOC_Os02g14530.1 | ROYSNOKAVSLPSSPHRLRSDGSGJ  | S | 480  |  |  |      |                  |                            |   |     |
| 759 | LOC_Os02g14530.1 | WSSHAHKLGSTSLTKQERNSGSPG   | S | 33   |  |  |      |                  |                            |   |     |
| 762 | LOC_Os02g14530.1 | TSNMRRGRRRRSISFTPEIGDDIVSA | S | 401  |  |  |      |                  |                            |   |     |
| 765 | LOC_Os02g14780.1 | DEQPKQVIVDGHSGSTGRATAQALS  | S | 513  |  |  |      |                  |                            |   |     |
| 768 | LOC_Os02g15220.1 | VRSVMORGPI TVSYHTHFESEKFR  | S | 245  |  |  |      |                  |                            |   |     |
| 771 | LOC_Os02g15220.1 | NPKPPNPSPSSSPLAQTIASTRRS   | S | 65   |  |  |      |                  |                            |   |     |
| 774 | LOC_Os02g15310.1 | SYSPAPRRDDYASAPQRKTHRAK    | S | 177  |  |  |      |                  |                            |   |     |
| 777 | LOC_Os02g16090.1 | QPVYDKISGRVASWRGNMAVAGRT   | S | 786  |  |  |      |                  |                            |   |     |
| 780 | LOC_Os02g16890.1 | EYYLYGVEVNLGSERYFKQDDISVE  | S | 55   |  |  |      |                  |                            |   |     |
| 783 | LOC_Os02g18660.1 | TTAASDDGTIVGSKGKADNGKIDG   | S | 447  |  |  |      |                  |                            |   |     |
| 786 | LOC_Os02g18660.1 | GDEBGEVEYGDSSSEPEPEPVKKE   | S | 99   |  |  |      |                  |                            |   |     |
| 789 | LOC_Os02g18660.1 | PPQKPSGRGAASDDEEEFEEDSDT   | S | 60   |  |  |      |                  |                            |   |     |
| 792 | LOC_Os02g18660.1 | GKVSQYNLAPEPSSSKSGKALSRW   | S | 191  |  |  |      |                  |                            |   |     |
| 795 | LOC_Os02g19150.1 | CELLSSRSAGDCSETDSCASDTGV   | S | 196  |  |  |      |                  |                            |   |     |
| 798 | LOC_Os02g19220.1 | VGRDMFEDEGGGSETGVDDIAGAES  | S | 71   |  |  |      |                  |                            |   |     |
| 801 | LOC_Os02g19860.1 | VAPPSRRPIKRMSSPERWEAKQLTA  | S | 418  |  |  |      |                  |                            |   |     |
| 804 | LOC_Os02g20570.1 | IAKDRPKRNIKPSORVTEFANIVAY  | S | 679  |  |  |      |                  |                            |   |     |
| 807 | LOC_Os02g20970.1 | DOHSSPERGESESPTRKHIRKKAHV  | S | 622  |  |  |      |                  |                            |   |     |
| 810 | LOC_Os02g22370.1 | NDGQPELLIRASDGETSTHADSIT   | S | 396  |  |  |      |                  |                            |   |     |
| 813 | LOC_Os02g24080.1 | GETRGPMLTRDDSEIRKGSHEIORH  | S | 217  |  |  |      |                  |                            |   |     |
| 816 | LOC_Os02g24330.1 | PPPERRSFGRGSPVRGFDNGSRPL   | S | 386  |  |  |      |                  |                            |   |     |
| 819 | LOC_Os02g25060.1 | VDTYKPFKEGSDVDITSDSESGTIE  | S | 396  |  |  |      |                  |                            |   |     |
| 822 | LOC_Os02g25580.1 | TWARPRGSDDGYSQSVLKHSSSDE   | S | 587  |  |  |      |                  |                            |   |     |
| 825 | LOC_Os02g26140.1 | GKVQVAAAAASYKTRCTFSPSRIL   | S | 318  |  |  |      |                  |                            |   |     |
| 828 | LOC_Os02g28980.1 | GNMISKLSKLEDESEGETTQAPSK   | S | 610  |  |  |      |                  |                            |   |     |
| 831 | LOC_Os02g29410.1 | TVPDKILNKIRHSVRLIGGNTVYKA  | S | 355  |  |  |      |                  |                            |   |     |
| 834 | LOC_Os02g30140.1 | LSSSLRSLSLSSSPRGRHHRGATTR  | S | 39   |  |  |      |                  |                            |   |     |
| 837 | LOC_Os02g30230.1 | SKNAADDMIRLISGFDRNLISQITSD | S | 50   |  |  |      |                  |                            |   |     |
| 840 | LOC_Os02g31220.1 | SGGAEEGLYRLSSVGEEDINLSNIS  | S | 75   |  |  |      |                  |                            |   |     |
| 843 | LOC_Os02g32350.1 | ERLQIWOYGDVESDEFEQAAPARRT  | S | 970  |  |  |      |                  |                            |   |     |
| 846 | LOC_Os02g32550.1 | VARSRSVGCGRSESGDEPLERISNG  | S | 278  |  |  |      |                  |                            |   |     |
| 849 | LOC_Os02g33320.1 | KHTRGYQODIKDSRLSGESVPIPIR  | S | 490  |  |  |      |                  |                            |   |     |
| 852 | LOC_Os02g33320.1 | PPGLRSMAYSNYSPLIVSGSPQHNI  | S | 436  |  |  |      |                  |                            |   |     |
| 855 | LOC_Os02g33320.1 | HSPSHSAHSSKSEQPTQOPEGLRSM  | S | 418  |  |  |      |                  |                            |   |     |
| 858 | LOC_Os02g33770.1 | MLDIGNVVKTSDEEDVDGHHHG     | S | 68   |  |  |      |                  |                            |   |     |
| 861 | LOC_Os02g34080.1 | PRIMKASMVGRSGEQTSSIPGRSEF  | S | 1270 |  |  |      |                  |                            |   |     |
| 864 | LOC_Os02g34560.1 | TNVERORSFDDRSISDVSYSGGGHG  | S | 48   |  |  |      |                  |                            |   |     |
| 867 | LOC_Os02g34560.1 | LNKPRINVERORSFDDRSISDVSYSS | S | 43   |  |  |      |                  |                            |   |     |
| 870 | LOC_Os02g34560.1 | LAVGAGGMRRSASHTSISPSDDFDL  | S | 15   |  |  |      |                  |                            |   |     |
| 873 | LOC_Os02g34570.1 | TAGGSDETOATSPKSLKDAVKPKH   | S | 373  |  |  |      |                  |                            |   |     |
| 876 | LOC_Os02g34840.1 | KRRAAGDDGPSESADDDIVVAQTSK  | S | 30   |  |  |      |                  |                            |   |     |
| 879 | LOC_Os02g35150.1 | HDTSDDRWVATNSDVDSILETOYOR  | S | 574  |  |  |      |                  |                            |   |     |
| 882 | LOC_Os02g35190.1 | KMEMKDQIKTSGSEVILORFGAEDFA | S | 689  |  |  |      |                  |                            |   |     |
| 885 | LOC_Os02g35750.1 | MDKAMAEILMWSRGCPYDILVSYNT  | S | 361  |  |  |      |                  |                            |   |     |
| 888 | LOC_Os02g36974.1 | AEDFAISELDITSEESYKDSITLMO  | S | 217  |  |  |      |                  |                            |   |     |
| 891 | LOC_Os02g37130.1 | SSKENNGVMVTSPPDLIEDPRKPEQ  | S | 134  |  |  |      |                  |                            |   |     |
| 894 | LOC_Os02g37880.1 | KEALLVMEFCEKSLVSAMESRGTCY  | S | 113  |  |  |      |                  |                            |   |     |
| 897 | LOC_Os02g38050.1 | TSIGS9PLDTQNSKSSGARGLKITLS | S | 237  |  |  |      |                  |                            |   |     |
| 900 | LOC_Os02g38220.1 | SGSGKVTALHNSPDQS0ITESMEO   | S | 463  |  |  |      |                  |                            |   |     |
| 903 | LOC_Os02g38480.1 | PTAAHSRLMRKGSDDHIVITGRES   | S | 1680 |  |  |      |                  |                            |   |     |
| 906 | LOC_Os02g38840.1 | SPSSGRASEFSLISGLKDELSSESFG | S | 21   |  |  |      |                  |                            |   |     |
| 909 | LOC_Os02g38920.1 | BEDLVSTDFQGDSSSTFDKAGATIA  | S | 292  |  |  |      |                  |                            |   |     |
| 912 | LOC_Os02g38920.1 | EYKSDVNTVSNACTTNCIAPIAKY   | S | 153  |  |  |      |                  |                            |   |     |
| 915 | LOC_Os02g38980.1 | SEGAAGSPVRVDSFEDSSAPKRKCTS | S | 54   |  |  |      |                  |                            |   |     |
| 918 | LOC_Os02g39010.1 | NPQDRREKHKMSPDPLFEQRMKEQ   | S | 671  |  |  |      |                  |                            |   |     |
| 921 | LOC_Os02g39550.1 | ESRALAVLASASSYKEROEELISIV  | S | 609  |  |  |      |                  |                            |   |     |
| 924 | LOC_Os02g39700.1 | STGESPERTTVNSDMEEQKSSDDMT  | S | 278  |  |  |      |                  |                            |   |     |
| 927 | LOC_Os02g39840.1 | QENNDKLSQPSAKAQVGPAPALV    | S | 176  |  |  |      |                  |                            |   |     |
| 930 | LOC_Os02g39920.1 | VYDDGKISERTISDELPOEPAKLEQ  | S | 280  |  |  |      |                  |                            |   |     |
| 933 | LOC_Os02g40430.1 | SGRONESAMRSTSLIDYDPPPSRD   | S | 574  |  |  |      |                  |                            |   |     |
| 936 | LOC_Os02g40880.1 | DMVRCQINFKRILSLTDIKIDIKRVP | S | 54   |  |  |      |                  |                            |   |     |
| 939 | LOC_Os02g42040.1 | AASVEKPENEKLSDESQKQVPHDT   | S | 824  |  |  |      |                  |                            |   |     |
| 942 | LOC_Os02g42040.1 | BGSKDPRAVESSEGGFTVDEEGGSA  | S | 974  |  |  |      |                  |                            |   |     |
| 945 | LOC_Os02g42580.1 | ILAPLPAASIVRSASISFTIDVKT   | S | 335  |  |  |      |                  |                            |   |     |

[illegible]

|      |                  |                            |   |      |  |  |  |  |  |  |  |
|------|------------------|----------------------------|---|------|--|--|--|--|--|--|--|
| 4930 | LOC_Os07g05190.1 | SRFSWSPDSGEAYTQEGLARLDVRS  | Y | 747  |  |  |  |  |  |  |  |
| 4933 | LOC_Os07g19130.1 | SKVCFEDIQNMKYLKMTIKENERLH  | Y | 81   |  |  |  |  |  |  |  |
| 4936 | LOC_Os07g31840.1 | RAQKLAAAREAPYAKSRTQETROMQ  | Y | 601  |  |  |  |  |  |  |  |
| 4939 | LOC_Os08g01100.1 | PYLDKAAELKAEYHNGERSDENNYG  | Y | 153  |  |  |  |  |  |  |  |
| 4942 | LOC_Os08g09910.1 | NSRHGNI VDDYNYGSDIIDSDDIHE | Y | 388  |  |  |  |  |  |  |  |
| 4945 | LOC_Os08g34230.1 | NLAHKLKGMENWYEELMRNSKSYNE  | Y | 25   |  |  |  |  |  |  |  |
| 4948 | LOC_Os09g31230.1 | PDI RASMVORRGYTSDDI DDIGNP | Y | 722  |  |  |  |  |  |  |  |
| 4951 | LOC_Os09g36090.1 | RPAESSHGESAGYTSKSDSPNIGTH  | Y | 1173 |  |  |  |  |  |  |  |
| 4954 | LOC_Os10g37740.1 | AKKLVPGEPNLSYICSRYYRAPEL I | Y | 300  |  |  |  |  |  |  |  |
| 4957 | LOC_Os11g18470.1 | EREKRETOGLVDYYNDSFSKIKALH  | Y | 232  |  |  |  |  |  |  |  |
| 4960 | LOC_Os12g03899.1 | KKGSTGTGVDDGYCTEGGCPGCVVDR | Y | 29   |  |  |  |  |  |  |  |
| 4963 | LOC_Os12g07530.1 | I GREYYDDVDSYDLSPORMAEPYD  | Y | 615  |  |  |  |  |  |  |  |
| 4966 | LOC_Os12g42140.1 | ALYGVFAEGSDSYSDDGRRRSRRK   | Y | 56   |  |  |  |  |  |  |  |





















































[illegible]





[illegible]

[illegible]

[illegible]

[illegible]



[illegible]

[illegible]

[illegible]

[illegible]

**Table S3. Filtered negative dataset.**

| No.  | Protein Name   | Sequence                   | Amino acid | Position |
|------|----------------|----------------------------|------------|----------|
| 4976 | LOC_Os01g03520 | ASLDDGTASDGASWETVDDNQTDLP  | S          | 667      |
| 5029 | LOC_Os01g13530 | EKSSSKGRGFLKSLLTRRRWRNDES  | S          | 297      |
| 5037 | LOC_Os01g15039 | TVSEAVARAPSHSRRRYVIYVKRGV  | S          | 329      |
| 5043 | LOC_Os01g16110 | KSLMDEHGWPISKVADFNRLKKMT   | S          | 364      |
| 5087 | LOC_Os01g34410 | PPGGFLSYFQDPSILQNHFPVPPN   | S          | 102      |
| 5104 | LOC_Os01g39110 | HHHHHHHQLLFSPPPVMAHHQELA   | S          | 256      |
| 5112 | LOC_Os01g40480 | PYAAAYTRSKVYQSPKLWYLRASVIE | S          | 493      |
| 5142 | LOC_Os01g43170 | FPGYGSPQFPFGSAQAQMHHQHPVQ  | S          | 433      |
| 5199 | LOC_Os01g53140 | GVYLRNSQTKANSYWRRHQKIRRSF  | S          | 56       |
| 5219 | LOC_Os01g55420 | PSRRQPLLRLPGKSTAFKREERRKRK | S          | 28       |
| 5242 | LOC_Os01g58550 | TLSGVQVGADWTSILKRRHVYREAF  | S          | 251      |
| 5243 | LOC_Os01g58550 | VNNKPLSPSYKYSRKIPVKTSKSES  | S          | 333      |
| 5273 | LOC_Os01g63950 | SAYDAPPPHHEDSDGDDTDEAAAED  | S          | 51       |
| 5282 | LOC_Os01g64790 | NALVYPATAASWSESSYHHHPPPPH  | S          | 337      |
| 5287 | LOC_Os01g65560 | EALVKTRVEDGFSKYIPWHIVNKI   | S          | 91       |
| 5309 | LOC_Os01g68860 | PLRPGEELCKFYSRYGICKFGANCK  | S          | 388      |
| 5353 | LOC_Os01g74020 | VPSPYHPHPHHHSYNNAAYAATVSS  | S          | 217      |
| 5373 | LOC_Os02g03040 | ALRDDDEKRNQYSPERRGRDRSPDR  | S          | 176      |
| 5405 | LOC_Os02g07370 | LLRHPPVVPDPESPVRWLDDVANL   | S          | 100      |
| 5487 | LOC_Os02g24330 | EEEKGEMQPKSRSSNPFGAARPREV  | S          | 295      |
| 5496 | LOC_Os02g26349 | MMKMMGIPVGFSTKGKHVPDADVS   | S          | 157      |
| 5548 | LOC_Os02g35690 | RHPQWQEVAEVSRRDGYSKQPKSD   | S          | 101      |
| 5581 | LOC_Os02g40690 | PLRPRHPAPPLPSPQWSRKNPSHPA  | S          | 38       |
| 5582 | LOC_Os02g40690 | QWSRKNPSHPAASAADDMDDDAIT   | S          | 52       |
| 5628 | LOC_Os02g48730 | IKDQLEKDKDDESLRRWKEQLGGSV  | S          | 218      |
| 5630 | LOC_Os02g48910 | AWTQKHSSTPIVSHYPPYAVIGSTP  | S          | 174      |
| 5719 | LOC_Os03g01490 | EYVPEFNLWFGFSDESPHYLAASN   | S          | 290      |
| 5721 | LOC_Os03g02010 | FGGRKKTRFVDGSKRKRYGSGPSG   | S          | 256      |
| 5735 | LOC_Os03g02480 | AIFFYWVTSNLFSLGYGFVLRKPAV  | S          | 358      |
| 5745 | LOC_Os03g04330 | NRRSHKPHASDASFPLTWIGATPSI  | S          | 124      |
| 5761 | LOC_Os03g06340 | AISSDMDDELSDSRKRASLKSAREF  | S          | 451      |
| 5762 | LOC_Os03g06340 | LVMHAYNPPNVDSFIDHLGLHKALC  | S          | 271      |
| 5767 | LOC_Os03g07380 | KNGALPDYSMDFSKIREMRKQNKKE  | S          | 43       |
| 5781 | LOC_Os03g10180 | LESSIANNKFHFSFYKWGGKGAVLV  | S          | 224      |
| 5788 | LOC_Os03g10740 | TRGVGGKPYRNDSSQKDATRIKAGI  | S          | 21       |
| 5829 | LOC_Os03g14860 | AAAAAASDDGEYSARAPAPQVFTEF  | S          | 39       |
| 5851 | LOC_Os03g16690 | GETYEMVNHQGISFIAEQVSHHPPM  | S          | 168      |
| 5856 | LOC_Os03g17490 | AKKKARLERFGQSTNVDKGEEERK   | S          | 130      |
| 5874 | LOC_Os03g20340 | SGKDHSLLLILPSGVYRYRFVVDGE  | S          | 155      |
| 5879 | LOC_Os03g20600 | QACVCAPTTHPGSFRCKHHRQNASN  | S          | 71       |
| 5906 | LOC_Os03g24890 | ELNHQVIGGREISIVFAEENRKTPQ  | S          | 133      |

|      |                |                            |   |      |
|------|----------------|----------------------------|---|------|
| 5918 | LOC_Os03g26460 | KLNLKPEGQFIFSAKGPADDTPYEL  | S | 128  |
| 5937 | LOC_Os03g30860 | APQSVGNKNKYVVSFIDDYSKFTWIY | S | 536  |
| 5940 | LOC_Os03g31750 | KQLHLSVLAVFNSWDSARAKKYRSI  | S | 228  |
| 5975 | LOC_Os03g45300 | SKVGPGNSEWLYSVYNCRQHWVPVY  | S | 446  |
| 5991 | LOC_Os03g47800 | TQRHRGFGFVTFSDPEAVDSA IKEM | S | 56   |
| 6005 | LOC_Os03g50340 | NAVLICSDVDGGSYELYIVPKDSAG  | S | 390  |
| 6028 | LOC_Os03g52490 | VPLEMTRHVS MISITLSPRDLDKNS | S | 109  |
| 6060 | LOC_Os03g57854 | DYSKPHSIHVPESDIGYHFGTLLDN  | S | 202  |
| 6108 | LOC_Os04g02000 | WMCSNCNNHNYASRAFCNRCKTQKE  | S | 323  |
| 6123 | LOC_Os04g08440 | LTDKTLSEDCEGSERVQRISKRYVL  | S | 1548 |
| 6137 | LOC_Os04g14640 | CKLLKFTSEEGSSAFFLWRSDCSFL  | S | 97   |
| 6140 | LOC_Os04g16360 | PVG IHQGRNIQVSYEFYHPMSSARQ | S | 153  |
| 6146 | LOC_Os04g18090 | AI AKYMEEKHGASLPANYKKMLSIQ | S | 70   |
| 6166 | LOC_Os04g24700 | FLLQIDPKYPDESRYVMHDLIHDMA  | S | 478  |
| 6170 | LOC_Os04g26660 | TLHQHPDELQHSPYRYHPRRGGAR   | S | 183  |
| 6183 | LOC_Os04g31260 | FFRFGSFKIRDSSQVRFWEDKWLG Y | S | 53   |
| 6201 | LOC_Os04g35090 | LPSEIVPATLKKSARPPGRPFSGP   | S | 94   |
| 6222 | LOC_Os04g38290 | EEIRLFDGAISESRDLRRYVIAVME  | S | 415  |
| 6232 | LOC_Os04g39090 | SARSMDDLKLDSSREAYSSWSGNL   | S | 183  |
| 6243 | LOC_Os04g40430 | PLNAFKPHPEHKS KLICNITGDIIN | S | 98   |
| 6370 | LOC_Os04g57460 | RRARTPPPPPRQSPRREKALERAEG  | S | 37   |
| 6382 | LOC_Os04g59040 | ADDPEYRHYNDISELSPHRLQEIKR  | S | 156  |
| 6395 | LOC_Os05g01540 | VRRGRSSSSYS DSPTPPRRGPRRVL | S | 384  |
| 6442 | LOC_Os05g07000 | SPRRRRSPSYGKSGPPSHWGS HGAD | S | 175  |
| 6457 | LOC_Os05g08970 | KRKPKGGDAAEGSEKRPK KKKDPN  | S | 544  |
| 6485 | LOC_Os05g20230 | EAHESPYSIHPGSTKMYLDLKEKYW  | S | 1316 |
| 6493 | LOC_Os05g24160 | INNTSYGSLPGFSNRKAAEQSAAEV  | S | 85   |
| 6495 | LOC_Os05g24430 | HRDGLLHSFDFKSFETCESCLLGKM  | S | 427  |
| 6521 | LOC_Os05g32610 | LSKLVFSTEDFSNVRNMLS KAEME  | S | 1384 |
| 6524 | LOC_Os05g32960 | ILLFRSFEGLKFSSLRFKYHAEMRR  | S | 249  |
| 6533 | LOC_Os05g34540 | LYAESLARFQGGSPYIPLYGLGEL   | S | 222  |
| 6571 | LOC_Os05g40960 | LQNHGVLKAYDDSTLFCRKQS QDQE | S | 277  |
| 6577 | LOC_Os05g41500 | GGSSFSFHARSFSGVETTPKFGSFN  | S | 95   |
| 6578 | LOC_Os05g41500 | SFSGVETTPKFGSFNPADDLLVAFQ  | S | 105  |
| 6582 | LOC_Os05g41770 | PRRKVQRPVYFVSEALRDAKTRYPQ  | S | 619  |
| 6600 | LOC_Os05g43730 | VDGGACAHVSRRSLKAMKRELLAAA  | S | 550  |
| 6601 | LOC_Os05g43950 | SDALALYRLEYKSSDTKRSVKSKLA  | S | 497  |
| 6636 | LOC_Os05g49150 | VDDSLAAAAEDSSFRLVDAKPPPRH  | S | 89   |
| 6656 | LOC_Os06g01320 | LDDFVRQRF GFESYERVERGLLVPK | S | 851  |
| 6659 | LOC_Os06g01680 | EKA VDDLNYRLQSLVPGDSEHVQVL | S | 803  |
| 6683 | LOC_Os06g06530 | GDNPAKVKEFVKSYNALHEMGFTSS  | S | 195  |
| 6701 | LOC_Os06g09930 | LCYLLFREL RKFSFKLVYFLAVSDM | S | 53   |
| 6728 | LOC_Os06g16390 | DESICRQEAHGRSWKVIEQGLLLKG  | S | 535  |

|      |                |                           |   |     |
|------|----------------|---------------------------|---|-----|
| 6751 | LOC_Os06g22700 | RTHCNCNKYRYSREVCEPGHSPHR  | S | 114 |
| 6789 | LOC_Os06g30570 | ASGKAAKNYVRHSGWVVRDNPVST  | S | 133 |
| 6807 | LOC_Os06g34710 | EIRNEVSyddGfSGKMgSLHGMTST | S | 551 |
| 6810 | LOC_Os06g35800 | WQWRVVEVASTGSwRKfVSKVREKG | S | 116 |
| 6829 | LOC_Os06g37770 | SGAGRPVGGEeASELRRERRSDSFR | S | 31  |
| 6871 | LOC_Os06g45360 | PVVHSYSIVTLHSAFFYVDKRKVSv | S | 231 |
| 6879 | LOC_Os06g46890 | HRPRSRDRGSSHSRSPiRKRHRKKL | S | 103 |
| 6886 | LOC_Os06g48530 | HRGGGGGRGGGSSPPPYRSGRRHS  | S | 94  |
| 6903 | LOC_Os06g50840 | GLDGIRMLDPNTSRTLRIYPLETVT | S | 229 |
| 6904 | LOC_Os06g50890 | VNHGNTLYVTGLSSRVTERELKDyF | S | 73  |
| 6906 | LOC_Os06g51220 | YNKAIaAYNKGESTAKKAPAKEEEE | S | 115 |
| 6921 | LOC_Os07g03180 | LLLVLALSvILVSATAFHHHHHDG  | S | 25  |
| 6926 | LOC_Os07g04530 | GDTRKLERWSDSSKYsVDGRPPQ   | S | 134 |
| 6961 | LOC_Os07g14270 | YSIMFGPDICGYSTKKVHTIFTKND | S | 150 |
| 6984 | LOC_Os07g25810 | AKGDDNAAGEEKSLWLKKQFGKGLG | S | 42  |
| 7020 | LOC_Os07g37610 | ITDQELQHLSGDSNSvITPLFEKML | S | 445 |
| 7081 | LOC_Os07g47920 | QGGNLNYQYQPQSPHVQYQQAGSAQ | S | 232 |
| 7088 | LOC_Os07g49270 | LNVDLLDVHADKSTFHRFDKFNlKY | S | 431 |
| 7091 | LOC_Os08g01054 | DIKDGSCDIRDSSLAaVKRKKPKDL | S | 184 |
| 7101 | LOC_Os08g01930 | PPNYPPGPGNYNSYGPSQGPNYGQP | S | 433 |
| 7105 | LOC_Os08g02354 | GWQRMWWHYAQRsVLADVRRELrKT | S | 336 |
| 7113 | LOC_Os08g03390 | QAAPSQAELLFKSfKIKKEKLKSEN | S | 327 |
| 7115 | LOC_Os08g03520 | PDDGGEDLFVHQSSLKSDGYRSLND | S | 36  |
| 7125 | LOC_Os08g06070 | NDREKQIKAIEDSFRAAKSRPVHQT | S | 223 |
| 7145 | LOC_Os08g12760 | DGQPYLPLHFPFSSPYyQPPASPSM | S | 149 |
| 7150 | LOC_Os08g14460 | LQQRQRDIEFREStNDLRQRMQSDI | S | 128 |
| 7177 | LOC_Os08g23930 | AYCSVLRAFKAQSDAISWEKEGLIT | S | 75  |
| 7183 | LOC_Os08g25080 | MDESQASDEARYSGKNGGGTDLNlN | S | 161 |
| 7197 | LOC_Os08g28670 | LKEYYDPYHVTFsFAPVPGKEGEQC | S | 100 |
| 7259 | LOC_Os08g42740 | RKLCGICfEGYSSDVMSADCDHF   | S | 163 |
| 7287 | LOC_Os09g07690 | CKLLRYLNWKNgSKLWRMTKRDSAL | S | 587 |
| 7336 | LOC_Os09g23730 | FSKNNYFRGDDPSLPPKRGGRPPK  | S | 94  |
| 7361 | LOC_Os09g29840 | IQGLVKNYSQFVSFPIyTWQEKsRT | S | 289 |
| 7386 | LOC_Os09g33970 | RKEAFSSDKNEYSHLLVSDFSDTTP | S | 549 |
| 7426 | LOC_Os09g38580 | LIGNMQTYLQsISKRLeeWRLRQRD | S | 406 |
| 7432 | LOC_Os09g39540 | VLFDQATYDKLLSEVPKYQITPSV  | S | 53  |
| 7439 | LOC_Os10g02584 | PAERDTKQLLSGSPFLHHQHQQHVP | S | 43  |
| 7444 | LOC_Os10g06130 | KRDFGFVHFaERSSALKAVKGSEKY | S | 338 |
| 7448 | LOC_Os10g07270 | HYSAYAKLVEEDSWYHFDDSHVSSV | S | 878 |
| 7492 | LOC_Os10g26540 | EWDmKNGAVPDYSMDfSKiREMRKQ | S | 38  |
| 7509 | LOC_Os10g33230 | ESDQGKLFIggISWETTEEKLrDHF | S | 14  |
| 7557 | LOC_Os10g41400 | NRQGNdVGTQYRSGIYYTPEQeKA  | S | 190 |
| 7562 | LOC_Os10g41960 | FSASGNISVSGVSWPIFRWGGGKDD | S | 321 |

|      |                |                            |   |      |
|------|----------------|----------------------------|---|------|
| 7586 | LOC_Os11g03890 | NQGGFFDSEYRHSPPPRPPKPAEDK  | S | 190  |
| 7589 | LOC_Os11g04890 | RILCLHTNQSMHSIRLDKKKRVRE   | S | 251  |
| 7590 | LOC_Os11g04930 | AAEQKTPDPVPGSEICYFKNGVCQG  | S | 328  |
| 7596 | LOC_Os11g06170 | AGHKRSGSMDGESSLFEGESAPPDY  | S | 131  |
| 7644 | LOC_Os11g19060 | AAQNLHNLHHFSSLGYTHNFFQQSD  | S | 441  |
| 7658 | LOC_Os11g29380 | RLINEMVLANKCSLEIDYKQFIYIH  | S | 280  |
| 7672 | LOC_Os11g33340 | PVVHSYSIVTLHSAFFYVDNRKVS   | S | 264  |
| 7694 | LOC_Os11g37990 | RNLSKRKALARSIEIQRREALSHH   | S | 704  |
| 7712 | LOC_Os11g42000 | EKNGLGSYEVNFSYIEAGEQKQALV  | S | 150  |
| 7749 | LOC_Os12g03710 | NQGGFFDSEYRHSPPPRPPKPAED   | S | 142  |
| 7801 | LOC_Os12g15730 | PVEESNLPFKKHSIFFRYLNWYKDL  | S | 97   |
| 7819 | LOC_Os12g22620 | EDALDLGALAGASFLPLQRRSMKRE  | S | 176  |
| 7827 | LOC_Os12g24580 | QAANGSARAAIESLKPCLKVKLECS  | S | 64   |
| 7828 | LOC_Os12g25530 | QLRADCSKVQVDSVKPEYELFPLKY  | S | 363  |
| 7835 | LOC_Os12g31040 | RCLHSVKVPTGFSANVRKLVSLKDL  | S | 841  |
| 7850 | LOC_Os12g34370 | IWILTPHDAVAFSRRFAVVEKRWRV  | S | 23   |
| 7874 | LOC_Os12g38970 | RPPRRQENEYSESERESEYETEGE   | S | 568  |
| 7917 | LOC_Os12g00500 | NKVGSKNVVAGESLIKKRIEERFFI  | S | 44   |
| 7921 | LOC_Os01g01270 | HQINMAKEDEEKTAFFTPFGGALSG  | T | 1073 |
| 7922 | LOC_Os01g01510 | DAHEELMAIGPVTNEVTAGQSKDKG  | T | 246  |
| 7923 | LOC_Os01g01510 | ELMAIGPVTNEVTAGQSKDKGKMQP  | T | 250  |
| 7924 | LOC_Os01g01800 | NIPYGRPTEFLITSADGVEYNLKPA  | T | 713  |
| 7925 | LOC_Os01g01960 | RIDTNGVIRVKTLFNGYPELILGF   | T | 20   |
| 7926 | LOC_Os01g02020 | KFNSAKLRKLGPTFKKNGSVTAGNS  | T | 248  |
| 7928 | LOC_Os01g03760 | TGMFCWAHFLFPTLCAKPSGNPQTR  | T | 329  |
| 7929 | LOC_Os01g03820 | EIGIRQSSSGGSTSGIADNKVSQTF  | T | 320  |
| 7931 | LOC_Os01g04330 | FDVYDVGDGGRITAAELGKVLGRIG  | T | 121  |
| 7932 | LOC_Os01g04330 | GREVAAMMNELDTRDGFVDLGEFA   | T | 77   |
| 7933 | LOC_Os01g04650 | PQPQQSHAFDPNTGMYIIPMRNAP   | T | 525  |
| 7934 | LOC_Os01g05010 | LPLLRASASAAGTTRGAAALLRPLA  | T | 27   |
| 7935 | LOC_Os01g06290 | RDSRSPKGSPRDTQSPRGSPRDSRS  | T | 235  |
| 7936 | LOC_Os01g06630 | AELDRRARDGDKTVIKSGTGKSLD   | T | 30   |
| 7937 | LOC_Os01g07110 | NSSVIAVQSMFHTGLVRPDPVSRSS  | T | 209  |
| 7939 | LOC_Os01g07520 | DLKITIGNYNGSTDGKLRLQLENMLR | T | 187  |
| 7940 | LOC_Os01g07880 | AQQARERKKAYMTELEAKADLELR   | T | 136  |
| 7941 | LOC_Os01g08260 | SITISGYPKNQETFTRISGYCEQND  | T | 92   |
| 7942 | LOC_Os01g08410 | KKAAVPVAPPKDTERQLSKKELKKK  | T | 177  |
| 7943 | LOC_Os01g08970 | LEKGGFFLPKPPTLILHEEIEFVEF  | T | 376  |
| 7944 | LOC_Os01g08970 | TSNTQFLGDENRTAAQVLWETIMGV  | T | 186  |
| 7945 | LOC_Os01g09280 | VASHAQKYFIRQTNSSRRKRRSSLF  | T | 158  |
| 7946 | LOC_Os01g09550 | ICYTHPEKLPGVTRDGLSKHFFHRP  | T | 153  |
| 7947 | LOC_Os01g09620 | PARYRTQPCCKGTACRRRVCFFAHT  | T | 161  |
| 7948 | LOC_Os01g09790 | SDDASSAAADPFTAATVARAPAK    | T | 89   |

|      |                |                            |   |      |
|------|----------------|----------------------------|---|------|
| 7949 | LOC_Os01g09850 | CDALAEESARAVTAAAVAGQQQHG   | T | 211  |
| 7950 | LOC_Os01g10140 | KHLLYGASEFEETPRDLDDVFSEAC  | T | 509  |
| 7951 | LOC_Os01g10350 | NEKTNENFQVGATDPFPSQHVAPSS  | T | 266  |
| 7952 | LOC_Os01g10350 | PFPSQHVAPSSFTTRNALAPLPSNS  | T | 280  |
| 7953 | LOC_Os01g10820 | GIRRNEKIACYVTVRGEKAMQLLES  | T | 72   |
| 7954 | LOC_Os01g11040 | GSTSHSSETNQSTVRTPDTVIGQTE  | T | 802  |
| 7958 | LOC_Os01g12360 | LGAPDPQEGPEATVGRPHLSFPDPE  | T | 1204 |
| 7960 | LOC_Os01g12590 | RHYFQAHRVTVVTSYPLGQILHNRE  | T | 1371 |
| 7963 | LOC_Os01g12760 | VDLVEHLTAYSNTVVSRAVFGDESA  | T | 201  |
| 7964 | LOC_Os01g12780 | WIVYDLDAKELRTWYEERLLRDRGM  | T | 19   |
| 7967 | LOC_Os01g13680 | DRTTFVFWDAYHTSDATNQVIADRL  | T | 19   |
| 7968 | LOC_Os01g14690 | GPLEALRPKLQPTRQQQQRRLIN    | T | 95   |
| 7969 | LOC_Os01g14860 | SFGIVFQAKCLETGETVAIKKVLQD  | T | 94   |
| 7970 | LOC_Os01g14920 | SPKRDRLRSPVRTTSDIRPHTDSR   | T | 202  |
| 7972 | LOC_Os01g15020 | TPPTENGVPNGRTSTSSATSNPAAD  | T | 1113 |
| 7973 | LOC_Os01g15020 | TVACTLSQGSSVTSMDFHPTRHTLL  | T | 343  |
| 7974 | LOC_Os01g15039 | GNQGTCLDGFHGTDSTRLLRRVESAV | T | 199  |
| 7975 | LOC_Os01g15260 | YIKKEFDKNHGPTWHCIVGRNFGSY  | T | 94   |
| 7976 | LOC_Os01g15600 | GGVGGDVELVSKTLQFEHKLIFYFDL | T | 41   |
| 7977 | LOC_Os01g16020 | GYLRRWDEFRPTFRFLDLLQRVIFY  | T | 367  |
| 7978 | LOC_Os01g16240 | LGTVMRSLGQNPTEAELQDMINEVD  | T | 45   |
| 7979 | LOC_Os01g16390 | SFQGGAPQLERLTLAVLKPKPEDGIF | T | 932  |
| 7980 | LOC_Os01g16400 | HRVKLFEPFEAMTIPPGLSAMESLQ  | T | 754  |
| 7981 | LOC_Os01g16430 | AHDAPSAANSVETDALARFAVDEHN  | T | 63   |
| 7982 | LOC_Os01g16500 | HLLEDYGSSSSSTPRDMFAIGGTST  | T | 230  |
| 7983 | LOC_Os01g17320 | VFNMKMDLGFVPVTVFSCNQLLLLYK | T | 277  |
| 7984 | LOC_Os01g18070 | SRHRTL MNIFDKTPHVHRDAFVAPS | T | 52   |
| 7985 | LOC_Os01g18890 | FTSDATLVQSQSDTAALVDLYARNRK | T | 191  |
| 7986 | LOC_Os01g19150 | SGNSMDIGHTIVTTVGGRNGQPKQT  | T | 57   |
| 7988 | LOC_Os01g19940 | LQQGASNSTKGTTEPLKPKLQRTAY  | T | 105  |
| 7989 | LOC_Os01g20940 | LFSAADLSEQVVTAEIIGKEDIPLT  | T | 100  |
| 7990 | LOC_Os01g21180 | IGYTKMSAKDIKTINKIGVDNMHY   | T | 157  |
| 7992 | LOC_Os01g23540 | TNLSNAFEEAAATAHPEQPPTGDAN  | T | 230  |
| 7993 | LOC_Os01g23640 | VILLRYSSLVCETIPKHRDYHTFKL  | T | 69   |
| 7994 | LOC_Os01g23930 | SYELVIVTTVQPTIQEWEHAADNLA  | T | 1227 |
| 7995 | LOC_Os01g25040 | LRVMLPKPNLLPTNTYEVKKLICPL  | T | 387  |
| 7997 | LOC_Os01g25370 | VHESSNIVITRETLQCLNETEWLND  | T | 303  |
| 7999 | LOC_Os01g26920 | STTTAPFSVNLSTAAARAPRLLLLS  | T | 35   |
| 8000 | LOC_Os01g26970 | VPYVIFCAPPYRTDDYPGDLRVAAS  | T | 163  |
| 8001 | LOC_Os01g27790 | LLRHPPVVPDPETPARRWLDDVADL  | T | 126  |
| 8003 | LOC_Os01g28560 | QKRKLNSDEITSTSNSKTKVQKTGP  | T | 213  |
| 8004 | LOC_Os01g28660 | DVDQWHRGDLHQTPGEEVQAKISRR  | T | 381  |
| 8006 | LOC_Os01g31360 | QQQFGQDGSQSDTMVPQAYSPKSKN  | T | 578  |

|      |                |                            |   |      |
|------|----------------|----------------------------|---|------|
| 8007 | LOC_Os01g31580 | RYQHASSMGAVETRKGKTMSTASL   | T | 343  |
| 8008 | LOC_Os01g31629 | HVQQQQYVDPYRTMVLSPQPDHLNA  | T | 17   |
| 8009 | LOC_Os01g32720 | PQPDPCLLDASTGITKPAKEQGKL   | T | 208  |
| 8010 | LOC_Os01g32870 | VYGDNFFKPASYTIEAMCAKSYEDT  | T | 279  |
| 8011 | LOC_Os01g33240 | VEGEDTTLWDNETNIPDDWTTISMS  | T | 343  |
| 8012 | LOC_Os01g33370 | SSQTYKCEICSRLLDDFRFCSLGC   | T | 131  |
| 8013 | LOC_Os01g33800 | SFSMNGKEGRGDTSVWTDTPLERAQ  | T | 478  |
| 8014 | LOC_Os01g34330 | ATAKFDVMEKQLTSPRDHQPKPLA   | T | 595  |
| 8015 | LOC_Os01g34780 | EDSQEYKALDSETYSRELFEECVVH  | T | 265  |
| 8018 | LOC_Os01g37080 | FMPESATGREIVTLGEGRPAPDYPG  | T | 42   |
| 8019 | LOC_Os01g37920 | EVGLGAGASAAETAEMAATARTARM  | T | 38   |
| 8020 | LOC_Os01g38160 | RAFKSGVRDRYTTQELATRRITTTQ  | T | 526  |
| 8021 | LOC_Os01g39780 | ANIFIGVYVFAKTYKRDQEKKNAQT  | T | 46   |
| 8022 | LOC_Os01g39780 | TYKRDQEKKNAQTAAAAAVALSS    | T | 58   |
| 8023 | LOC_Os01g40050 | SLDRCDWLDKKNTIFGKVTGDSIFN  | T | 129  |
| 8024 | LOC_Os01g40070 | RQRVAVCIWRLATGEPLRLVSKRFG  | T | 273  |
| 8025 | LOC_Os01g40110 | KQANGVEQTPKETVGAPVTESAQVN  | T | 142  |
| 8026 | LOC_Os01g40110 | SKKQKIKWKKIITKVLQTNPDGVLK  | T | 241  |
| 8027 | LOC_Os01g40370 | PGNGGYQRTTDTDFAKEAAAAHAG   | T | 31   |
| 8028 | LOC_Os01g40390 | LLRLPHVVRVLTERRRCHVVPVPE   | T | 262  |
| 8030 | LOC_Os01g41090 | KRHAIEDDLHLVTQNPGESLRDYVR  | T | 527  |
| 8031 | LOC_Os01g41280 | RRLYLGVFRFPDTTGHPRGPDVFPH  | T | 194  |
| 8033 | LOC_Os01g41430 | MAALFAARGVRCTILTTPVNAAVVR  | T | 41   |
| 8034 | LOC_Os01g41550 | VSGLAQGSGEYFTKIGVGTPTPAL   | T | 149  |
| 8035 | LOC_Os01g41630 | NPTRPARSLSTLTRVRRGAESTGI   | T | 457  |
| 8036 | LOC_Os01g41880 | EEEEKEPEDKEMTLEEYEVLEEKR   | T | 243  |
| 8037 | LOC_Os01g42250 | YAKKVNLSVADLTFAFDGDKVDAES  | T | 204  |
| 8038 | LOC_Os01g42294 | ALSAARGLAHLHTVHSLVHGNVKSS  | T | 494  |
| 8039 | LOC_Os01g42350 | TAVISLLQPAPETYDLFDDIILLSD  | T | 413  |
| 8040 | LOC_Os01g42370 | YAFGQVAIEFPYTLVQSIYGIIVY   | T | 1282 |
| 8041 | LOC_Os01g42410 | SEDALKEKHANLTGEVVEGQKDTKS  | T | 795  |
| 8042 | LOC_Os01g42850 | GMDFVMQVINEPTYLEDLTGLTDLM  | T | 1008 |
| 8043 | LOC_Os01g43050 | NFEPEIQPHVQDTDVEQQPACTSQS  | T | 720  |
| 8044 | LOC_Os01g43340 | IVTLLRDVVFDDETQFPFTKLHPNAG | T | 646  |
| 8046 | LOC_Os01g43774 | FELAASYTHAPHTVMTLHPMHGAQM  | T | 633  |
| 8047 | LOC_Os01g43920 | SLHTRTLDELFLTKLLQKYQIAFH   | T | 144  |
| 8048 | LOC_Os01g46070 | LVSSLSLYDIAGTPGVAADVSHINA  | T | 64   |
| 8050 | LOC_Os01g47600 | PLVDRRRPKKPPTAFFYFMEFRKT   | T | 54   |
| 8052 | LOC_Os01g48280 | LKDKWSPALQIRTVLLSIQALLSAP  | T | 105  |
| 8053 | LOC_Os01g48640 | HTTDPAILVAATLALYGPSSDHGS   | T | 112  |
| 8055 | LOC_Os01g49190 | FVEQATEQQILVTGIKVVDLLAPYQ  | T | 211  |
| 8060 | LOC_Os01g49890 | AERLGREHLGGMTDLWVKHCGISHT  | T | 187  |
| 8064 | LOC_Os01g51080 | VKEVALGDGPSKTTTRIGDMPGVPRE | T | 776  |

|      |                |                            |   |      |
|------|----------------|----------------------------|---|------|
| 8066 | LOC_Os01g51890 | PLDILAQRLPDSTKPFISEKALRSC  | T | 365  |
| 8067 | LOC_Os01g52390 | RDGAGRGNWGTATDEALAQETEEAL  | T | 191  |
| 8068 | LOC_Os01g53000 | SIVDPQTSLYACTVGQKPSKAKYYL  | T | 830  |
| 8069 | LOC_Os01g53370 | EALIFPEGFLRRTKGRGLVVM_SWAP | T | 354  |
| 8070 | LOC_Os01g53370 | GAELGIPTYFFLTTCIASVAFMLYL  | T | 158  |
| 8074 | LOC_Os01g53680 | HRVTSTRNKVKITDRMWARLLSSTN  | T | 504  |
| 8075 | LOC_Os01g53680 | STVKQYFVNADDTVPEKVVVQKDSP  | T | 129  |
| 8076 | LOC_Os01g54400 | LTGAEQPSKNAATAATAAAGNSSAA  | T | 89   |
| 8077 | LOC_Os01g54400 | VPRTIETTPFPPTTFVQADTASFQV  | T | 61   |
| 8078 | LOC_Os01g54530 | GVLEALLWRTNSTFAISEHGARSNI  | T | 332  |
| 8080 | LOC_Os01g55040 | LNQQFVIQLGLFTALPMIENSLEQ   | T | 1421 |
| 8081 | LOC_Os01g55050 | QHPPVQNQMPPQTTPNPYPHYQPHQS | T | 406  |
| 8082 | LOC_Os01g55050 | YADNLLRSLEGITNRLSQLIICYK   | T | 92   |
| 8084 | LOC_Os01g55650 | ENGILFNVVKRDLLTPTGGVELQG   | T | 785  |
| 8086 | LOC_Os01g56140 | ELQKLKDERKEATLERERREQELSE  | T | 677  |
| 8087 | LOC_Os01g56140 | NLEKALHDMRGETAETKVSYESKLA  | T | 144  |
| 8088 | LOC_Os01g56490 | EEELPHTNPGLNTTPLRFTKHSNAY  | T | 500  |
| 8089 | LOC_Os01g56800 | GLQYRQFQREIPTNLVSYQLPGPVG  | T | 1114 |
| 8092 | LOC_Os01g57420 | PEKFKNQLSNQKTYLKLACTQGWFC  | T | 265  |
| 8094 | LOC_Os01g58580 | DECIVPSDMNLITDQDFRELVQKVP  | T | 116  |
| 8095 | LOC_Os01g58620 | VLVSYFAACGVTAVLFRAAVVKGR   | T | 237  |
| 8096 | LOC_Os01g59250 | HIDLHHTVFSGHTTVGNHSAVAGAA  | T | 131  |
| 8097 | LOC_Os01g60190 | NAVEAVKTLRAETKASDQYLPPFVI  | T | 251  |
| 8099 | LOC_Os01g61210 | GNTWEETRVFVDTIIVRCNLQSLART | T | 178  |
| 8101 | LOC_Os01g61370 | TPDQRVGSFDRITSKRFEDIFLGRA  | T | 151  |
| 8102 | LOC_Os01g61660 | KANGKLRCIDYTDLNKACPKDPYP   | T | 885  |
| 8103 | LOC_Os01g61720 | TGGASVRDDASLTSTPALPSYMQST  | T | 414  |
| 8104 | LOC_Os01g61910 | QEEVWSLQETFSTSAVIEDNEARAL  | T | 207  |
| 8105 | LOC_Os01g62030 | AVVGGTGRYDGATGFAVVRAADAHK  | T | 133  |
| 8106 | LOC_Os01g62290 | KGEGPAIGIDLGTTSYSCGVWQHDR  | T | 15   |
| 8107 | LOC_Os01g62290 | RAKRTLSSTAQTTIEIDSLYEGIDF  | T | 286  |
| 8109 | LOC_Os01g62500 | FGTTSGVVVLAGTNRPDILDKALLR  | T | 466  |
| 8110 | LOC_Os01g62650 | AEREVLINEMLGTTDENEPLQAMMK  | T | 982  |
| 8113 | LOC_Os01g63250 | GNLEEQGANKSETSEPNSDNIESAS  | T | 304  |
| 8115 | LOC_Os01g63770 | SCASNQVAQVLLTLPSFSQLGMLS   | T | 74   |
| 8117 | LOC_Os01g63810 | RNRILHVADTSNTLIVCEDWDEAKN  | T | 209  |
| 8119 | LOC_Os01g64450 | DCYIRVPDPSNATAVAMGFTATRCR  | T | 224  |
| 8120 | LOC_Os01g64650 | RDLDETKIILHKTIESVLQRGERLD  | T | 174  |
| 8122 | LOC_Os01g65260 | EGAGIAAAGDDGTIKLERGLGLVGD  | T | 126  |
| 8126 | LOC_Os01g66520 | GVGKESDIFEVATEDGTVLAMKLHR  | T | 112  |
| 8128 | LOC_Os01g67170 | DEDDLQQLLELGTSNRRGIESHHGC  | T | 461  |
| 8129 | LOC_Os01g67250 | NDLQVTAEKGTTESDGSNKVGSALT  | T | 522  |
| 8130 | LOC_Os01g67330 | AAGAYLYTLFFVTVPALASVYNEKA  | T | 218  |

|      |                |                             |   |      |
|------|----------------|-----------------------------|---|------|
| 8132 | LOC_Os01g67690 | AWRNIEALYSTGTRARAVNTRLALT   | T | 124  |
| 8133 | LOC_Os01g68160 | AKQAKRTPIKNDTPKRSASYVCNSC   | T | 286  |
| 8134 | LOC_Os01g68160 | KEENEPVVVTLKTFPHEMAKIEAPI   | T | 238  |
| 8135 | LOC_Os01g68750 | SSSTEKVATANATPQPAKEQVIPSA   | T | 822  |
| 8138 | LOC_Os01g68920 | REEVLERVEGSATSTSTGDGERLL    | T | 52   |
| 8144 | LOC_Os01g70020 | SSKESDVTVDKTTKKASKSKKDEGK   | T | 368  |
| 8145 | LOC_Os01g70100 | VKDVVVNGITVKTKYCDTCMLYRPP   | T | 149  |
| 8146 | LOC_Os01g70320 | ARESKDGKDGEVTTLKHELDCAKEE   | T | 298  |
| 8147 | LOC_Os01g70330 | DRKIMSSGQKFTGSIIEHDDNIST    | T | 366  |
| 8148 | LOC_Os01g71000 | KLGPVGDKTHVSTRVMGTYGCAPE    | T | 244  |
| 8150 | LOC_Os01g71050 | VILPRSTCDFTVTMQARTAPPDMQ    | T | 69   |
| 8151 | LOC_Os01g71960 | AAYAILITLHRETINGKSHMKKQEL   | T | 129  |
| 8152 | LOC_Os01g71990 | EAFSSIGAHILETNAQVVDSDVIV    | T | 72   |
| 8153 | LOC_Os01g72270 | KRMHYLHAAITETMRLYPPVPLASR   | T | 396  |
| 8156 | LOC_Os01g72690 | LLTEDSYNFIQTWDDDEEKMLHT     | T | 313  |
| 8158 | LOC_Os01g73480 | HLIQQLMVLAWTTRSPWLQNHASM    | T | 117  |
| 8159 | LOC_Os01g73620 | PGQRLEERAKSATTSKVRSSLAAD    | T | 169  |
| 8160 | LOC_Os01g73950 | ARKFPPFADPFPTHIAKYGTDDAR    | T | 495  |
| 8161 | LOC_Os01g74230 | EAPENGGPGPPTTGVGPLPACQTV    | T | 1007 |
| 8165 | LOC_Os02g01380 | DEEDVGVGVRATDDHDDQVDESHD    | T | 356  |
| 8166 | LOC_Os02g01960 | PRSRAPPSPSPSTSSRAKPRKVAQA   | T | 38   |
| 8167 | LOC_Os02g02290 | RSGHRVLLFSTMTKLLDILEEYLQW   | T | 1319 |
| 8169 | LOC_Os02g02410 | AYLGKKINDAVVTVPAYFNDAQRQA   | T | 175  |
| 8170 | LOC_Os02g02570 | AHFSSTLPPGIDTVWFYKGLPLKW    | T | 75   |
| 8171 | LOC_Os02g03060 | DGAGEHPSTSAMTMPFAVSDPSASV   | T | 54   |
| 8172 | LOC_Os02g03820 | SNCSNALEEDLRTVEEWSSKYRAEE   | T | 541  |
| 8174 | LOC_Os02g04490 | NGAGYFNGEPTVTSQMQQKQFPSN    | T | 248  |
| 8175 | LOC_Os02g04560 | NKLEKERVVPKITIGEVCFFMRNSE   | T | 504  |
| 8176 | LOC_Os02g05260 | TVGVVSFRFMRPTVMHFKAQKQILR   | T | 1142 |
| 8177 | LOC_Os02g05310 | LIDGILYAFQEQTSDDANVMLNGFG   | T | 882  |
| 8180 | LOC_Os02g05510 | SKSKAEATS SVITSSEGS PNWGAVE | T | 215  |
| 8181 | LOC_Os02g05900 | DTLSFEQSILKITS MKLGNLWNNPN  | T | 83   |
| 8182 | LOC_Os02g06370 | ERLSLPISKAFTVMRTALS FALPH   | T | 182  |
| 8183 | LOC_Os02g06584 | SVNEDLNERSPNTAATKKRSIPYST   | T | 270  |
| 8184 | LOC_Os02g06584 | TMTRSDKYRSDVTD FDKTSKGTEAT  | T | 311  |
| 8185 | LOC_Os02g06740 | PVPAILMNCNQTTC EKTIEVCQEI   | T | 1108 |
| 8186 | LOC_Os02g07070 | APTEMIDSDIKPTVSN SLGTTIMG   | T | 757  |
| 8187 | LOC_Os02g07070 | TEDSLPADPTSSTPLHPKRGSELGP   | T | 387  |
| 8188 | LOC_Os02g07210 | IPDVNNATIDHETLLERLGT YGLAE  | T | 75   |
| 8189 | LOC_Os02g07260 | KKLADLT TTKGATTI IGGDSVAAV  | T | 353  |
| 8190 | LOC_Os02g07630 | FFIRMVCPRIHFTRSL LLMHLGPFY  | T | 331  |
| 8191 | LOC_Os02g07870 | DALAESDKITLETAK LLREDYLAQN  | T | 512  |
| 8192 | LOC_Os02g07940 | LADRVARKEEAWTWNPSGSGVAASA   | T | 399  |

|      |                |                            |   |      |
|------|----------------|----------------------------|---|------|
| 8194 | LOC_Os02g08300 | GTQFEIRVQPNDTIMAVKKIIEEIQ  | T | 22   |
| 8195 | LOC_Os02g08360 | DSKEGDTLQRWRTEPFIMITGSGRW  | T | 404  |
| 8196 | LOC_Os02g08360 | VIESFNDLYRSITGRITAEALKERV  | T | 553  |
| 8198 | LOC_Os02g09740 | VATMKISPAEKMTPERIYGKTGSMR  | T | 373  |
| 8199 | LOC_Os02g09750 | KPPPPSPSPRPTALVCRAAAAGE    | T | 27   |
| 8202 | LOC_Os02g10690 | KNKSAGETEETVTPGRPVRLSLDS   | T | 290  |
| 8203 | LOC_Os02g10790 | ESKIEEILRNSATSEFGGVYYYSER  | T | 531  |
| 8204 | LOC_Os02g11060 | PREIDKSPGSVRTVAWLHSDQSILS  | T | 150  |
| 8205 | LOC_Os02g11750 | INRRVVRVNEVRTRGAREFGREGFR  | T | 86   |
| 8206 | LOC_Os02g11780 | RSQKETPSKVQTQQLSVRSKFRE    | T | 157  |
| 8207 | LOC_Os02g11840 | SSRLNYCVGGEVTTLFHLDQMYLL   | T | 258  |
| 8211 | LOC_Os02g12540 | RALENVHRIVDSTLEEVIEERRGAA  | T | 253  |
| 8213 | LOC_Os02g13330 | ERAAGPGRPTCTSLVAQRVDAPLA   | T | 48   |
| 8214 | LOC_Os02g13500 | EGNTQGEVIVRGTNREANDSDDEEP  | T | 241  |
| 8215 | LOC_Os02g13560 | QQFAGINGVLYYTPQILEQAGVAVL  | T | 548  |
| 8216 | LOC_Os02g13990 | GPKVVAPTPEQITAIKAAIVNSQTL  | T | 208  |
| 8217 | LOC_Os02g14059 | EHIDLGIKYDPSTGIYGMDFYVVLE  | T | 122  |
| 8218 | LOC_Os02g14770 | ESLRAIPWIFAWTQTRFHLPVWLGf  | T | 780  |
| 8219 | LOC_Os02g14780 | LSVRTSFLKDNLTLAYYNIGPGVVI  | T | 768  |
| 8220 | LOC_Os02g15060 | VECIDMWLHSHRTCPMCRCDLSPPR  | T | 142  |
| 8221 | LOC_Os02g15220 | LDKSRPLSHTPTYSARTPSMKKPK   | T | 467  |
| 8222 | LOC_Os02g15310 | PVRDVYLPKDYTGEPGRGAFVEFV   | T | 74   |
| 8225 | LOC_Os02g17320 | IRGMHTIIRDAATTHDFIFYADRL   | T | 284  |
| 8227 | LOC_Os02g17870 | EEEESESESEYETDSEDEQTMAMV   | T | 167  |
| 8228 | LOC_Os02g17870 | NEDTTDWNAPWATNGPLRAKYNAM   | T | 398  |
| 8229 | LOC_Os02g17970 | GTTAVTVLVRGKTIYIANTGDSRAV  | T | 218  |
| 8230 | LOC_Os02g18330 | EKFNMDSYPSKTPMVVRSLDVEKD   | T | 536  |
| 8231 | LOC_Os02g18430 | FGVFLYELLHGTTPFKGSGNRATLF  | T | 369  |
| 8232 | LOC_Os02g18550 | DNYMLRLFCIGFTKRRPNQVKRTCY  | T | 143  |
| 8234 | LOC_Os02g19220 | DVEQTSSESDDVTEKSASKTLDQEP  | T | 515  |
| 8235 | LOC_Os02g19860 | ASVDLGCSDEILTIIAMIQTGNIFY  | T | 1029 |
| 8237 | LOC_Os02g21150 | FRPGAIEKYDGSTDPEEFFQVYSMV  | T | 486  |
| 8239 | LOC_Os02g21920 | AKGGRPELANVATCNPCKKRGGGGW  | T | 125  |
| 8242 | LOC_Os02g23970 | HLPNDVPLVKLVTKINKALPGDTPDY | T | 445  |
| 8244 | LOC_Os02g24080 | LEGYAAYKAEETTQRVQGCVRIAEE  | T | 136  |
| 8246 | LOC_Os02g27230 | RSYIQRFCQVRNTIPCIPAHVVIYA  | T | 341  |
| 8247 | LOC_Os02g27740 | ENKFGSNDSDFGTQSGRSFRHDPSF  | T | 240  |
| 8249 | LOC_Os02g28980 | KLKDYKEAKELCTEVLLEDSMNVKA  | T | 529  |
| 8250 | LOC_Os02g29400 | RSSVAAHGREAAATMAKKLLRSTGKA | T | 35   |
| 8253 | LOC_Os02g30050 | KSLPLDLRPKKTRAIRRLTKHQL    | T | 88   |
| 8256 | LOC_Os02g32350 | DNFAEAKLRLTRILIGKQVTVEME   | T | 444  |
| 8257 | LOC_Os02g32350 | QKQYRAMIEERDTSGGKSKGQGTGT  | T | 891  |
| 8258 | LOC_Os02g32490 | NPSEVCSENLDVTKGPVQISWFKGG  | T | 112  |

|      |                |                            |   |      |
|------|----------------|----------------------------|---|------|
| 8259 | LOC_Os02g33080 | FACTDVESENVDTAERLIREAHKKG  | T | 30   |
| 8260 | LOC_Os02g33610 | DEFGVQKIIPDTTFIKKWSHKIEAV  | T | 130  |
| 8262 | LOC_Os02g34270 | PAPSLVVPPLAGTGGRRVDVAREE   | T | 48   |
| 8263 | LOC_Os02g34500 | PILLEENNESAAATGNIIEEKNDVQL | T | 453  |
| 8265 | LOC_Os02g34590 | CSKEGLKEGERLTDANFNDPHTRTN  | T | 150  |
| 8266 | LOC_Os02g35130 | AREQEVHDAIGYTEEQISELKKEIQ  | T | 235  |
| 8269 | LOC_Os02g37420 | LEDARQHANANMTVMLIGNKCDLSH  | T | 113  |
| 8270 | LOC_Os02g37420 | LTIGVEFGARMITIDNKPIKLQIWD  | T | 49   |
| 8271 | LOC_Os02g37870 | GPSVKFLVNAVHTMEELKLTGNHLK  | T | 157  |
| 8272 | LOC_Os02g37870 | HLKGSRPLITFSTNFDEQPHWQLVK  | T | 179  |
| 8274 | LOC_Os02g38250 | QAEAASNQLQNYLTDKVYLEEPEGQY | T | 588  |
| 8275 | LOC_Os02g38840 | SYCMNPSSHSGWTRVIVEKPF GKDL | T | 175  |
| 8276 | LOC_Os02g38920 | VKVKDSKTLIFGTKEVAVFGCRNPE  | T | 73   |
| 8277 | LOC_Os02g38920 | WKHHEVKVKDSKTLIFGTKEVAVFG  | T | 68   |
| 8278 | LOC_Os02g39030 | KWNEENLNDIESTKPVREKITEPKT  | T | 30   |
| 8280 | LOC_Os02g39420 | SRASLVAWMGRLTHRYELAAGTLHR  | T | 206  |
| 8281 | LOC_Os02g39520 | LVALKLLRQAECTLLDDGDRGRQAG  | T | 683  |
| 8282 | LOC_Os02g39890 | GRSGGQVRDEYRTDYDPGRGGYGKM  | T | 134  |
| 8283 | LOC_Os02g39920 | EQAPSESMISAITPAMKALIKKELL  | T | 55   |
| 8284 | LOC_Os02g40430 | DAFNQSPDVRKTVVFCLVDIYIML   | T | 1346 |
| 8285 | LOC_Os02g41800 | GEEHEKPASFATLTQSDANNGGGF   | T | 123  |
| 8286 | LOC_Os02g41800 | GSGVIQNSPTDNTSSERLQWFRENS  | T | 574  |
| 8290 | LOC_Os02g43020 | HRYSEALADAECTVELKPDWAKGYS  | T | 62   |
| 8291 | LOC_Os02g43020 | LKDAEKCIELDPTFSKGYTRKGAIQ  | T | 455  |
| 8292 | LOC_Os02g44050 | AAVRHSAATPSSTPSTREDLRGGPD  | T | 163  |
| 8293 | LOC_Os02g44410 | GDDRVMANFFPMTLKGQARGWLMNL  | T | 240  |
| 8294 | LOC_Os02g44410 | PSQPIIGVTPGHTWPLGHIDLPTVF  | T | 614  |
| 8295 | LOC_Os02g44654 | AHVDLQDLLLLRLTFDNICGLAFGKD | T | 183  |
| 8297 | LOC_Os02g44810 | AVMASVGSSELTKCLECSERGRKV   | T | 195  |
| 8298 | LOC_Os02g44820 | EAELLERSRAITLNGRDKRGALV    | T | 26   |
| 8299 | LOC_Os02g44930 | DKKESTSSKAKTHDDGEGSDKSKS   | T | 114  |
| 8300 | LOC_Os02g46040 | QRISKRYVLVEGTLYRRAANGILLK  | T | 1610 |
| 8302 | LOC_Os02g46956 | TDSDQVAKAAMMTAEGAMNFMRSIT  | T | 269  |
| 8303 | LOC_Os02g47130 | EEKLPADVTDKTSSEDDLNEVEKL   | T | 372  |
| 8305 | LOC_Os02g47140 | SPKKIGEDIAKETAKDWKGLRVTVK  | T | 50   |
| 8306 | LOC_Os02g47410 | GMPWGGRPGHSFTAGGLPSSFAGKD  | T | 929  |
| 8307 | LOC_Os02g47890 | NGDAQPSQDKDITEEQVKGNKEVGS  | T | 171  |
| 8308 | LOC_Os02g47900 | SQIDRERVQTTGTTAYVIDATRYGN  | T | 447  |
| 8313 | LOC_Os02g48640 | QTEALLTKISGETASATVNSGSLAD  | T | 271  |
| 8314 | LOC_Os02g48730 | TLKEGSLYKLKFTFSVSNIVSGLR   | T | 286  |
| 8316 | LOC_Os02g49070 | RDMLTSDPYVVLTGEQKAQTTVKP   | T | 204  |
| 8317 | LOC_Os02g49080 | GPRGNSLKRVEATDCRVLIRGRGS   | T | 171  |
| 8318 | LOC_Os02g49090 | PPQLEVTPITKYTSDPGLVLGRQIA  | T | 208  |

|      |                |                            |   |      |
|------|----------------|----------------------------|---|------|
| 8320 | LOC_Os02g49450 | AEEKMDAKKEVTETSQATTAEHKD   | T | 219  |
| 8321 | LOC_Os02g49620 | RENKLDRHGEVDTANVDEIQSVDED  | T | 217  |
| 8322 | LOC_Os02g49992 | LITPHSLFRPHFTTLTQRSPSILSK  | T | 770  |
| 8323 | LOC_Os02g50320 | TSSSLVIKHAKGTSRFDGGTRSLD   | T | 429  |
| 8324 | LOC_Os02g50550 | LPGIDQRVMDDSTISEYAGHNDAIL  | T | 165  |
| 8325 | LOC_Os02g50620 | SDSIITAYRDHCTYLARGGDLVSAF  | T | 122  |
| 8327 | LOC_Os02g50840 | LPSRGEQPHPVETAAGSGTQRIITS  | T | 1476 |
| 8328 | LOC_Os02g50850 | KIDAKLNIYPSTTSELRGGDQKQSHG | T | 889  |
| 8329 | LOC_Os02g50910 | VLQRKTEEAAMATKRLKESLEAKKS  | T | 26   |
| 8330 | LOC_Os02g50960 | AGADPSKAMAAPTAMPPTSVMTRLI  | T | 426  |
| 8331 | LOC_Os02g50970 | SFGEVYRGEGWHGTEVAVKKFLQQDI | T | 860  |
| 8333 | LOC_Os02g51520 | TFITPIGTYCYTTMPFGLKNAGPTF  | T | 938  |
| 8334 | LOC_Os02g51860 | IGVQHDWCEAFPTYPRTYDMVHADG  | T | 570  |
| 8335 | LOC_Os02g52150 | LGRLLSLMDLATPAGRAGAATLRR   | T | 108  |
| 8336 | LOC_Os02g52250 | PCISNWKPNPKGYTIPLDKRLAADGR | T | 276  |
| 8338 | LOC_Os02g52780 | AAVPPPPPPQQQTPMLFGQSNVFPP  | T | 189  |
| 8339 | LOC_Os02g52820 | ETEAAPVDSTTLQLHNLLEYEKNH   | T | 108  |
| 8340 | LOC_Os02g53550 | DEEKTAFITPIGTYCYTTMPFELKN  | T | 900  |
| 8341 | LOC_Os02g53550 | FKLLKRSRGPFTWTTEAERALTQLKA | T | 1051 |
| 8342 | LOC_Os02g53580 | EMPDYRFLDRFTDEQLATMPESLH   | T | 105  |
| 8343 | LOC_Os02g53700 | EVSGSYNPEVLTTQKRQWSRFQLKS  | T | 88   |
| 8344 | LOC_Os02g53760 | WAVATTLHDPIVTTKPFSTCYVFKV  | T | 234  |
| 8345 | LOC_Os02g54110 | TSSGWAYTGHDYTSKKASGDLKKKD  | T | 1196 |
| 8349 | LOC_Os02g54910 | FKTSVLAVRLSRTRLVVVLQDRTFI  | T | 108  |
| 8351 | LOC_Os02g55560 | HQNALSSGTTALTAMIFGRSLLVAN  | T | 160  |
| 8352 | LOC_Os02g56480 | LPGEDLDALSVSTNDEDEHLEVLEY  | T | 113  |
| 8353 | LOC_Os02g56530 | DEVDPFQIPSDYTWVDANEKKRRMK  | T | 588  |
| 8354 | LOC_Os02g56560 | RGSLPWQGLKAGTKKQKYDKISEKK  | T | 220  |
| 8355 | LOC_Os02g56960 | VNPKGEMKGSAITGPIGKECADLWP  | T | 118  |
| 8357 | LOC_Os02g57510 | NDMDSSRGFLSGTVDKFKMVFETKS  | T | 87   |
| 8358 | LOC_Os02g57540 | HSYKHSGLANKKTVTIQPSGGKDAA  | T | 56   |
| 8360 | LOC_Os02g57640 | AGTSERKVTITGTSEAIQAAESMIM  | T | 322  |
| 8362 | LOC_Os02g58080 | VQFGWALQLSLLTPYIQLTGIDHAM  | T | 84   |
| 8364 | LOC_Os02g58220 | RNTDVSFTIDDGTGRDLDFIRWVNDG | T | 95   |
| 8365 | LOC_Os02g58220 | SKSRGASSTMPITVKQISEAQQSGI  | T | 41   |
| 8366 | LOC_Os02g58340 | RVEPIHVRPAVRTLLARLEGELTDL  | T | 103  |
| 8367 | LOC_Os02g58440 | FDKPKDSAHNKGTAQKQNLNTRAGH  | T | 192  |
| 8369 | LOC_Os03g01040 | TAFITPIGTYCYTTMPFGLKNAGPT  | T | 918  |
| 8370 | LOC_Os03g01420 | DDGEIIDRIEVFTGVEVLPGVHDGD  | T | 355  |
| 8372 | LOC_Os03g01470 | APPWPDLAGWRLTAGVETAMVGARG  | T | 19   |
| 8373 | LOC_Os03g01850 | FMDSCPEFAKNPTLIKSYLYQILRG  | T | 218  |
| 8374 | LOC_Os03g02150 | NNLVACTTFFSETTRAMLCLVRIET  | T | 959  |
| 8375 | LOC_Os03g02160 | DSKVKEELYVESTVIRDDMVVNPA   | T | 504  |

|      |                |                            |   |     |
|------|----------------|----------------------------|---|-----|
| 8376 | LOC_Os03g02350 | RELLAAAPTHEATCRARWSEVALTF  | T | 584 |
| 8377 | LOC_Os03g03430 | LPVVKQHLLLCTLLIGNSLAMEAL   | T | 75  |
| 8379 | LOC_Os03g03470 | NVHSLVPKTVWNTSYWDEFVSLPA   | T | 121 |
| 8380 | LOC_Os03g03560 | QISGKHCKIYRDTVLGELNRNEPVP  | T | 116 |
| 8382 | LOC_Os03g04330 | GPSYHHILTTLGTMSSRITSEQPN   | T | 100 |
| 8383 | LOC_Os03g04570 | TKQIVKVIPLLATMFPCTLIAQTN   | T | 350 |
| 8384 | LOC_Os03g04590 | LPSACVGDMMATVKKGKPDLRKKV   | T | 64  |
| 8386 | LOC_Os03g04960 | KPTPQLELFNSMTKKKELFEPLVEG  | T | 18  |
| 8387 | LOC_Os03g05200 | GSRCSFGRTSYTYENGHTSPDLLS   | T | 568 |
| 8388 | LOC_Os03g05260 | YGQVPAEMADEGTEVRKLLIQEQVE  | T | 191 |
| 8389 | LOC_Os03g05390 | VAEKRWRFVWKTAVYLITLGLIA    | T | 361 |
| 8390 | LOC_Os03g05460 | VERCGRHPSQVFTGVCSTCLMERLS  | T | 45  |
| 8391 | LOC_Os03g05790 | APIQICDSGVDLTVYAFHDTSLNAP  | T | 26  |
| 8392 | LOC_Os03g05790 | RPLPLVAILEGITRGTQKYLCKRYS  | T | 631 |
| 8393 | LOC_Os03g05812 | SSSVLSNSAPTTPNSSYDNLNESV   | T | 739 |
| 8394 | LOC_Os03g06220 | DESQIQAVTSGGTVYESAAAFEDLK  | T | 94  |
| 8395 | LOC_Os03g06220 | SAGGCQVLLFSATFNERVKDFVTRV  | T | 291 |
| 8396 | LOC_Os03g06260 | ASKPEGGNERLSTSVPAAPRQRMIM  | T | 702 |
| 8397 | LOC_Os03g06410 | SYGEVYRADWNGTEVAVKKFLDQDF  | T | 757 |
| 8398 | LOC_Os03g06710 | KMLASNTPPNDATFKALKIILVKRG  | T | 740 |
| 8400 | LOC_Os03g08270 | GVQTGPWLEADTAANMFLESKDEA   | T | 357 |
| 8401 | LOC_Os03g08270 | SIEERTLSLINKTTALNPNAQEFVP  | T | 14  |
| 8402 | LOC_Os03g08550 | AEFQAAQQSAGCTAPEVDMTGQYTL  | T | 584 |
| 8403 | LOC_Os03g08550 | LGGGQQIQYNLPTNKLRLNLGNQ    | T | 126 |
| 8405 | LOC_Os03g09100 | EQDEIQTTLSNPTKEIIDLSKKISS  | T | 569 |
| 8407 | LOC_Os03g10070 | GINLNEASCTMDTRDMPVKSPFA    | T | 459 |
| 8408 | LOC_Os03g10180 | DYVLGDKSEESGTHNTNNAKNNVL   | T | 324 |
| 8409 | LOC_Os03g10400 | LYKSAPHLNFKHTVFGMVVGLTTL   | T | 336 |
| 8410 | LOC_Os03g10400 | SGGGVGKYLKARTAGFADVADDN    | T | 432 |
| 8411 | LOC_Os03g10420 | SMTAYGFEPDLRTYNVLAVGLCQAG  | T | 315 |
| 8412 | LOC_Os03g10710 | MYHNSLRIKGSNTFIIYEMDQLEAG  | T | 80  |
| 8416 | LOC_Os03g11140 | PVVTILGGIDLNNTGSVVVKEDRKLL | T | 111 |
| 8417 | LOC_Os03g11200 | PPTYPAQAYTQQTQAQPSAMAVAAP  | T | 749 |
| 8418 | LOC_Os03g11290 | KLAEMPQLEESRTMEKVTTVKQSSI  | T | 197 |
| 8419 | LOC_Os03g11380 | EAIREDATKTLVTLHRQGEQITRTH  | T | 83  |
| 8420 | LOC_Os03g11500 | TFISKLVQVEGYSTERLLSHSIVWRA | T | 445 |
| 8422 | LOC_Os03g11580 | IGTNPDIGHQLLTEAAPCTERSLED  | T | 317 |
| 8423 | LOC_Os03g11580 | PHYNPFASFTEQTDPTLNIGCDVIP  | T | 720 |
| 8426 | LOC_Os03g11890 | EAVCEKAAVRDETANAAEEAGQRTS  | T | 345 |
| 8427 | LOC_Os03g11910 | GIIKQCLADAKLTPEDINDVILVGG  | T | 363 |
| 8428 | LOC_Os03g11970 | HGIQPDGLMPSDTPGIARDAFNTF   | T | 40  |
| 8429 | LOC_Os03g12010 | HKCESCGDLIKSTKIKGPSQDDCIE  | T | 157 |
| 8430 | LOC_Os03g12250 | SALLHGNRASGRTPLDWETRSAIAL  | T | 477 |

|      |                |                            |   |      |
|------|----------------|----------------------------|---|------|
| 8434 | LOC_Os03g13560 | RKQVPSESVSRFTTPLTPPPMPWGP  | T | 446  |
| 8435 | LOC_Os03g14490 | NDEVLSLGNACGTFIQWPKDLIEIR  | T | 362  |
| 8436 | LOC_Os03g14580 | KTNSAVKDSGKTTAQKKRRASSTD   | T | 286  |
| 8437 | LOC_Os03g14860 | AAELEKAAEPEKTPPPPPAAGAPSG  | T | 142  |
| 8438 | LOC_Os03g15000 | ESSPSHYVFAAATPYPPQYTNPNL   | T | 59   |
| 8439 | LOC_Os03g15010 | HNYEGLRYRSTFTCTHGGKARADAS  | T | 155  |
| 8441 | LOC_Os03g15040 | VRARKDITDGGKTKRPRMITRVGC   | T | 260  |
| 8442 | LOC_Os03g15050 | GQFPCNRYTHYMTSSTSVDINLARR  | T | 299  |
| 8443 | LOC_Os03g15650 | GSSKTSDDIKNDTLYSEVDNTGTQQ  | T | 446  |
| 8444 | LOC_Os03g15750 | DVFLETAKLCKYTEKELGASLFFGL  | T | 185  |
| 8445 | LOC_Os03g16000 | PKTAATHEHSRSTSEDHIFTNTSEP  | T | 287  |
| 8447 | LOC_Os03g16700 | FKVPELLIEIPETATVGSLLKKTVLE | T | 416  |
| 8448 | LOC_Os03g16910 | IQRVKVSWKNTLTNGIVKVSCTSVG  | T | 444  |
| 8449 | LOC_Os03g17020 | HSTPSKGSNQNGTTGGSYWTEGGFR  | T | 441  |
| 8451 | LOC_Os03g17180 | AAGWIEVSCWILTGERQTAVIRSKY  | T | 163  |
| 8452 | LOC_Os03g17180 | QEALDTLVMGNKTTILIAHRAAMMK  | T | 1352 |
| 8454 | LOC_Os03g17310 | FGSTEDISSKSFTGKEFMSLSDKKK  | T | 686  |
| 8455 | LOC_Os03g18180 | FDKEGNQWKERGTGTVKLLKHKETG  | T | 72   |
| 8457 | LOC_Os03g19250 | LLAALSIRGFRVTHTYGLSETYGPS  | T | 345  |
| 8458 | LOC_Os03g19250 | VAEVMVDQEFTLAEECLKILAOK    | T | 136  |
| 8459 | LOC_Os03g19290 | MSGSSNSSLETRTFLEVRGLEKNW   | T | 13   |
| 8460 | LOC_Os03g19290 | VAGALTGAVALTSDRASHERVVQC   | T | 149  |
| 8461 | LOC_Os03g19570 | RGKSNSNAFYVETNRKDEHVLSDFC  | T | 431  |
| 8465 | LOC_Os03g21040 | RIFCKADEGFSVTVRGGSVCLAPT   | T | 213  |
| 8468 | LOC_Os03g21350 | RRVKAVPAQSNSTAPAPKARVNHVA  | T | 304  |
| 8470 | LOC_Os03g21530 | KSLLIKCLVKHYTKQNLSEVRGPIT  | T | 111  |
| 8471 | LOC_Os03g22120 | RVNVHELVEQLTVSEYLRKFKEELV  | T | 111  |
| 8472 | LOC_Os03g22350 | DLRDLNDVSDYVTKAGYGESEVDD   | T | 257  |
| 8473 | LOC_Os03g22350 | KDFVNVSGPLGVTHFFILTNPKSSP  | T | 107  |
| 8474 | LOC_Os03g22880 | KNREVEDAEPKTATEGKKKKKSK    | T | 535  |
| 8476 | LOC_Os03g22890 | TRIEPDRRWFGNTRVVNQKELEFFR  | T | 89   |
| 8478 | LOC_Os03g24930 | AARAVAHAVQCTSPQPRDRPRMAA   | T | 373  |
| 8479 | LOC_Os03g25140 | TTRTIDGIIVNSTRREHGKGKGPLR  | T | 76   |
| 8480 | LOC_Os03g25260 | HYCSVCGSTANYTCVRCGTRFCSCR  | T | 148  |
| 8481 | LOC_Os03g25430 | AIFEIARGIWRPTSDKHGRDADSDD  | T | 183  |
| 8482 | LOC_Os03g25430 | DIDFPSPDNHATTQAFSSAAAAAAA  | T | 50   |
| 8483 | LOC_Os03g25450 | VCVARFHAAVPDARVARALEALTG   | T | 184  |
| 8484 | LOC_Os03g25600 | RYTLDSVLDSETRSGSFRQEVVVV   | T | 84   |
| 8485 | LOC_Os03g25720 | EDLVLQDTFAQETAVTIEDPNMLRY  | T | 96   |
| 8486 | LOC_Os03g25890 | ADFAGCVDTKKSTSGYVFTLANGAI  | T | 765  |
| 8487 | LOC_Os03g25970 | GNEESDEGLAQVTVRLLVPSDQIGC  | T | 139  |
| 8488 | LOC_Os03g26000 | EGLTENSCKSLHTLFAVLNTVFSKL  | T | 198  |
| 8489 | LOC_Os03g26630 | TVENEHLHAENNTPEFVEKTQDVGT  | T | 163  |

|      |                |                            |   |      |
|------|----------------|----------------------------|---|------|
| 8490 | LOC_Os03g27460 | RGSSSRGRVKKTARKKVGAGLKRR   | T | 296  |
| 8491 | LOC_Os03g27800 | ALAQIELAKESETRTLRLQQETKE   | T | 652  |
| 8493 | LOC_Os03g27840 | CRVHRDDALYQATEDQQGLIPWNGK  | T | 60   |
| 8494 | LOC_Os03g27930 | KNGRRVSYEAANTLIDDSRTCTGT   | T | 118  |
| 8495 | LOC_Os03g28960 | SVTSSTHEIKSKTVIFMEKEKIYLQ  | T | 226  |
| 8496 | LOC_Os03g28980 | EFDVTPAAISETKVAVATIRRKSQ   | T | 297  |
| 8497 | LOC_Os03g29085 | VEELPSVLWAVRTPTTSNKETPFF   | T | 863  |
| 8498 | LOC_Os03g29750 | GNFECDVESKAFTLAPDASTNREFN  | T | 374  |
| 8499 | LOC_Os03g30460 | ALTQLLLYYTRITECVKKINGGSAL  | T | 669  |
| 8501 | LOC_Os03g30790 | LPWITQFEPIQVTLQTDQVRNIPCG  | T | 113  |
| 8502 | LOC_Os03g30990 | KSPTRLKEVHKLTCMAALSRFVAR   | T | 935  |
| 8503 | LOC_Os03g30990 | PQIQKLLYAVIMTSRKLRYHQAHR   | T | 1050 |
| 8505 | LOC_Os03g33012 | NIESTEVS HGFQTTALTEDKPADDG | T | 190  |
| 8508 | LOC_Os03g36610 | RLQSGIRKDKIYTDGTVRYSCFTSS  | T | 30   |
| 8509 | LOC_Os03g37330 | EGFSEEFDLDAFLTLLRRAHRHSRIA | T | 78   |
| 8510 | LOC_Os03g39170 | AAPPEARAKEATAMAKKIAMVAG    | T | 557  |
| 8512 | LOC_Os03g39400 | KEYLDISCLMLATMSPELQRQYEAL  | T | 174  |
| 8513 | LOC_Os03g39570 | VWCMQYIDAKKTKEPIGFLDPTRI   | T | 721  |
| 8514 | LOC_Os03g39590 | GFEYLYVTIDKFTKWPEAYPVVKID  | T | 1177 |
| 8515 | LOC_Os03g40550 | STLYHLNVNGVQTRAIKMDPSAFTA  | T | 296  |
| 8517 | LOC_Os03g42770 | LTMDALSKDRLLTVARDRTMHLWKI  | T | 319  |
| 8519 | LOC_Os03g42840 | INKEEFQLALFKTNKKESLFADRVF  | T | 78   |
| 8520 | LOC_Os03g42840 | LSDEVIESIIDKTFEEDTKHDGKI   | T | 170  |
| 8526 | LOC_Os03g44390 | IEELPAVLWANRTTLSRATGETPFF  | T | 1737 |
| 8528 | LOC_Os03g44440 | AVRSDVIKSNDFTSKLLYCLWWGLA  | T | 355  |
| 8529 | LOC_Os03g44440 | DHQKGFWERTITRQYINETCEPRD   | T | 318  |
| 8532 | LOC_Os03g45344 | SRAVSAKIRAGATYDLQRNKS NLES | T | 48   |
| 8533 | LOC_Os03g46040 | ADSMTMSYDPQATESKQSELDLPLS  | T | 108  |
| 8534 | LOC_Os03g46046 | RSSAVGIPCEKVTRVRILGGQLRST  | T | 25   |
| 8535 | LOC_Os03g46570 | CAAAADAAESGVTFGGGQEAAPRK   | T | 97   |
| 8537 | LOC_Os03g47410 | TPWQWSAAAGEVTSTEFEEVEEPVGA | T | 746  |
| 8538 | LOC_Os03g47760 | KRPGEAGDGFVTSIRGLFNSQRRK   | T | 976  |
| 8540 | LOC_Os03g48350 | IDKFTKWIEAIPTEIKADNAIKFI   | T | 347  |
| 8541 | LOC_Os03g48350 | KSQVLADFVADWTMPDNKSDNQIDN  | T | 69   |
| 8542 | LOC_Os03g48674 | SDYVWRFNECRNTIPEITDASVIRA  | T | 460  |
| 8543 | LOC_Os03g48930 | VGASLYYIDYIATFHKIEKGAFGYG  | T | 122  |
| 8544 | LOC_Os03g49150 | GKAYLFNKVVNVTSGVKEDRMMITG  | T | 51   |
| 8545 | LOC_Os03g49500 | IRSTLDRHTILKTTLVELGGTLGLE  | T | 165  |
| 8546 | LOC_Os03g49580 | DTLKTLEMGAVELLIVWENLDV NRY | T | 320  |
| 8547 | LOC_Os03g49580 | LRMEKRHNYVRKTAELATQFFINPA  | T | 204  |
| 8548 | LOC_Os03g49640 | KELRIGETFEFGTGTSSLSTTND DD | T | 345  |
| 8551 | LOC_Os03g50180 | GATKKPQAQIVVTSSDGKTTEKKNN  | T | 48   |
| 8552 | LOC_Os03g50290 | EEMVEFMEKVAKTDTV GELTVEERN | T | 37   |

|      |                |                            |   |      |
|------|----------------|----------------------------|---|------|
| 8553 | LOC_Os03g50290 | EKVAKTTDVGELTVEERNLLSVAYK  | T | 44   |
| 8554 | LOC_Os03g50300 | AEDVESGSSDVETKYKKMYEDDINP  | T | 570  |
| 8558 | LOC_Os03g50740 | LERQQPSLWRRGTPLAMEVSAGREL  | T | 71   |
| 8559 | LOC_Os03g51030 | DAIHSLLQLILRGTLNDDIKPTRAAS | T | 589  |
| 8561 | LOC_Os03g51230 | HQKEIQNHLVEQTFDEYHLHEKSEIV | T | 549  |
| 8563 | LOC_Os03g51250 | YFNHIKSVADSLTALAWVGFLGKDC  | T | 143  |
| 8564 | LOC_Os03g51310 | IYFVSEALRDAKTRYPQAQKMLYAI  | T | 1226 |
| 8565 | LOC_Os03g51520 | ADGRGWSNGEVMGTGRPIQVETGYGE | T | 521  |
| 8566 | LOC_Os03g52310 | LLAALDYKQAFSTLETSDNYNEAP   | T | 423  |
| 8567 | LOC_Os03g52980 | RPKHLVVAIGNFTYLMPLQLEPVVP  | T | 559  |
| 8572 | LOC_Os03g53630 | QPLTRRGSIVNKTEDAVSGLDQNIC  | T | 283  |
| 8574 | LOC_Os03g53960 | QKAKESGQLLSNTKVVHKTNRPMKI  | T | 439  |
| 8575 | LOC_Os03g53970 | SCFDDEYCSPRTPVLNEETAFSLE   | T | 184  |
| 8576 | LOC_Os03g54780 | GGSSSPRESVSGTIFIRRTGSPSSPH | T | 168  |
| 8579 | LOC_Os03g55070 | VSKSDKIVVEKSTVPVKTAEAIEKI  | T | 128  |
| 8582 | LOC_Os03g56260 | STSSRSHAVLEITVKKRKQKGQYGSQ | T | 229  |
| 8584 | LOC_Os03g56790 | KQKQVVVEKTGATTESYDDFLASLP  | T | 55   |
| 8585 | LOC_Os03g56800 | LVSDDEVIDLITVNDVERIRSYPK   | T | 209  |
| 8589 | LOC_Os03g57100 | PAVYFLYDLSPITVTIKEERRNFLH  | T | 298  |
| 8590 | LOC_Os03g57160 | ECESCGAHLIFSTLTSPAEVSNA    | T | 137  |
| 8594 | LOC_Os03g57430 | GLKQSSPTDSEQTNTADVKTPEARLG | T | 528  |
| 8595 | LOC_Os03g57480 | FGLKNAGPTFQRTTRISLGSQIGRN  | T | 957  |
| 8597 | LOC_Os03g58170 | AATDEIFCLFQGTIENIAVLKQQYG  | T | 81   |
| 8598 | LOC_Os03g58250 | PQLSAAAAAATTSAVVDPVEYNAM   | T | 113  |
| 8599 | LOC_Os03g58480 | CSDAPPTPEAANTTAASSRSHRHSI  | T | 319  |
| 8600 | LOC_Os03g58810 | FLIYLKAAKISLTELVFNENKVPNL  | T | 472  |
| 8601 | LOC_Os03g59020 | EIIIGYTKAINKTVEILEDLVEKGS  | T | 140  |
| 8603 | LOC_Os03g59390 | EDIINSIIRDVDTDKDGKISYDEFA  | T | 487  |
| 8604 | LOC_Os03g59410 | ATCRARWSEVALTFDQTDHPPPCVAR | T | 595  |
| 8605 | LOC_Os03g59500 | ANRTTPSRATGETPFPLVYGAEAVL  | T | 1752 |
| 8607 | LOC_Os03g59680 | KIAKVVPEQSIATDHAGEYDESLED  | T | 249  |
| 8608 | LOC_Os03g60530 | SCLLRFSDBGSFTTSFITTIGIDFK  | T | 41   |
| 8609 | LOC_Os03g60620 | VPAYFNDSQRQATKDAGVIAGLNM   | T | 163  |
| 8610 | LOC_Os03g61010 | RDGKSYSTNLAFPTPEYLKTGRVIP  | T | 216  |
| 8611 | LOC_Os03g61160 | EKKVRLMRNRSLTREEVDFAFWRRQQ | T | 28   |
| 8613 | LOC_Os03g61220 | EKEIKESAPKLSTVCVYGGVSYNVQ  | T | 209  |
| 8614 | LOC_Os03g61690 | NLREAAAGPEGVTADAIIRDAFLATE | T | 124  |
| 8615 | LOC_Os03g61890 | AWKKALQLEAEGTEDLEFSCNVLV   | T | 578  |
| 8616 | LOC_Os03g62340 | HLNLALLGVEDDTLSHCSTEQTMDT  | T | 913  |
| 8618 | LOC_Os03g62379 | DQTGTFRGNRLSTSQFGMDDEYNE   | T | 23   |
| 8620 | LOC_Os03g62500 | RYYRAPELIFGATEYTTAIDLWSTG  | T | 262  |
| 8621 | LOC_Os03g62700 | VPELSLEDLKQKTDNFGSNALIGEG  | T | 66   |
| 8622 | LOC_Os03g63140 | RSNREGDLRQHETTVRKPYAESPNH  | T | 85   |

|      |                |                            |   |      |
|------|----------------|----------------------------|---|------|
| 8623 | LOC_Os03g63710 | LKNMAGETGKKLTSIASNFISDLDR  | T | 398  |
| 8624 | LOC_Os03g63920 | IEQEPNEYNGFVTKLCQKFRPAGDK  | T | 635  |
| 8625 | LOC_Os03g63920 | LISKEEAPDSDVTEEMARNFCLKPE  | T | 672  |
| 8627 | LOC_Os03g64400 | ALDKRQLPEVDKTSMYKASGYMDVD  | T | 538  |
| 8629 | LOC_Os04g01480 | ASSSAVLAAANNTGGAQHPMWKTSL  | T | 44   |
| 8630 | LOC_Os04g02150 | PQPTDTAVPDEKTQSPKEQSIDIDI  | T | 340  |
| 8631 | LOC_Os04g02500 | LETEGLEQASVDTQLTSSNVGFRL   | T | 99   |
| 8632 | LOC_Os04g03430 | WSRFTNLVQSGPTLSIPDYALLQHF  | T | 89   |
| 8633 | LOC_Os04g04254 | AEALKVPIHIFFTMPWPTSEFPH    | T | 299  |
| 8634 | LOC_Os04g04254 | KVPIHIFFTMPWPTSEFPHPLSRV   | T | 303  |
| 8635 | LOC_Os04g04680 | PFDRSVNLLDLGTIARTRTPVLSL   | T | 26   |
| 8637 | LOC_Os04g07060 | GKDVIRGRVNHVTAEDVLTTPDVIV  | T | 644  |
| 8638 | LOC_Os04g07250 | ITKATTSHHWFKTLNDLSTLVGFAD  | T | 409  |
| 8639 | LOC_Os04g08450 | SGDEELSVLPRHTKVIVTGNRTKS   | T | 32   |
| 8640 | LOC_Os04g09700 | RTCEGQFFARQTHLPAQELQTIPL   | T | 442  |
| 8641 | LOC_Os04g09860 | STSCVVNIGAQVTQVVCVEDGVALP  | T | 299  |
| 8645 | LOC_Os04g11990 | LVDPISCPYPATLIELPADPFPPD   | T | 392  |
| 8646 | LOC_Os04g13340 | SVHSWEDLCQQFTMNFQGTYPGE    | T | 307  |
| 8647 | LOC_Os04g14510 | EAEVAELLAELPTHRPRPLYRRWAE  | T | 108  |
| 8649 | LOC_Os04g14580 | PYLGEEDLESRTTSIEEGEDDADI   | T | 1242 |
| 8650 | LOC_Os04g14640 | NFKSSHCKLLKFTSEEGSSAFFLWR  | T | 91   |
| 8651 | LOC_Os04g15800 | EPKAKRRCSLAETVSFDGETPVAGA  | T | 116  |
| 8652 | LOC_Os04g16180 | VKKAFRQGFFWPTALKDACDMVQRC  | T | 224  |
| 8653 | LOC_Os04g17064 | SIIDNAQSLELATLLAGQIARAATV  | T | 88   |
| 8654 | LOC_Os04g17064 | VTIAMGTNRDITTACKRKIVSPSSP  | T | 224  |
| 8655 | LOC_Os04g17640 | DESDEVEGLTGQTGRQADQTTDTPP  | T | 637  |
| 8657 | LOC_Os04g19770 | VEKAFRQGFFWPTALKDACDMVQRC  | T | 373  |
| 8658 | LOC_Os04g21220 | LDWLHAVGKKLDTVQCSDEEKVVFA  | T | 412  |
| 8659 | LOC_Os04g21240 | SRPELVQRSLAWTCFVETPRAEPAP  | T | 91   |
| 8662 | LOC_Os04g23330 | PITDSDEKFCYTSREMVNNIRTIQ   | T | 172  |
| 8663 | LOC_Os04g23400 | TEAERVVADIETTNDWWTPLIKFIN  | T | 407  |
| 8664 | LOC_Os04g23400 | TIYTRRRQTGKHTRLPAQALQTIPL  | T | 451  |
| 8666 | LOC_Os04g24880 | RAQDNRTKSEEDTRARTETMITATT  | T | 248  |
| 8671 | LOC_Os04g27520 | LLSELTLKSPRATMYCEADQDQLRR  | T | 1750 |
| 8673 | LOC_Os04g28090 | EMLSEARARLANTRGKKAKRKAREK  | T | 161  |
| 8674 | LOC_Os04g28090 | RWYEWLDPSIKKTEWTREDEKLLH   | T | 60   |
| 8675 | LOC_Os04g28180 | QVDAAPFKQWYLTHYGVDIGRKKKA  | T | 116  |
| 8676 | LOC_Os04g28420 | KGHDGDEPFEFRTDEEQVIEGLDRT  | T | 333  |
| 8677 | LOC_Os04g28420 | KLKEYREAELCTKVLELESTNVKA   | T | 484  |
| 8679 | LOC_Os04g29180 | VTPPAQHIRTNLNTILRETPYDPVLN | T | 169  |
| 8681 | LOC_Os04g30010 | FTLYDREKIEVATNNFAKENIVGKG  | T | 444  |
| 8683 | LOC_Os04g30780 | VSQCDFDRLKLTSTAPFMERNLEFLI | T | 231  |
| 8684 | LOC_Os04g31090 | GSQGWLAYMVIYTPLPGTIYVLLCI  | T | 145  |

|      |                |                            |   |      |
|------|----------------|----------------------------|---|------|
| 8687 | LOC_Os04g31340 | GNISIRDVQYLLTAPNIYKDYRTIT  | T | 318  |
| 8688 | LOC_Os04g31500 | HEGECGAHSASRTLVGKAFRQGFYW  | T | 1688 |
| 8690 | LOC_Os04g32650 | GQAVSEGTVNNETLGYFIGRVYLFL  | T | 340  |
| 8691 | LOC_Os04g32950 | ADDFEPSLIPSKTIPDPDDKKPEDW  | T | 218  |
| 8695 | LOC_Os04g35240 | FEDPDDPKNFRKTIGRIMSIQYKIP  | T | 212  |
| 8696 | LOC_Os04g35800 | ADPAAAAAPAAAATDPAAAGSPSPPL | T | 34   |
| 8697 | LOC_Os04g35930 | VERCGGGGAGYLTSDDGGVVVISAP  | T | 239  |
| 8698 | LOC_Os04g36790 | AAPPGATGGAGGTSRRMASVNDASA  | T | 343  |
| 8700 | LOC_Os04g36890 | VDAKQKKNKNKNTSEAEAGAHQNTD  | T | 334  |
| 8701 | LOC_Os04g37950 | DLSVDIEQNSSITSCLKNFCSTETL  | T | 211  |
| 8703 | LOC_Os04g38090 | HQLRIKEEDIPNTFTTRYGLFECT   | T | 415  |
| 8704 | LOC_Os04g38480 | ISGTIPNELGNLTNLVSLDLYLNNF  | T | 122  |
| 8705 | LOC_Os04g38620 | TLTFSPNPYFEDTKLTKTYSFSDDDE | T | 134  |
| 8706 | LOC_Os04g38870 | IMQLLRDNLTLWTSIDISEDTAEEIR | T | 239  |
| 8709 | LOC_Os04g39400 | YPLGQILHNREGTGRVVKWAIELSE  | T | 1376 |
| 8714 | LOC_Os04g40720 | GCFLHVKMTVVVTDSHCCRDTSMED  | T | 111  |
| 8715 | LOC_Os04g40940 | LYNRGVYPEESFTKVKKYGLTMLLT  | T | 44   |
| 8716 | LOC_Os04g40950 | DSKTLFGEKEVTVFGCRNPPEEIPW  | T | 77   |
| 8717 | LOC_Os04g40950 | GILGYVEEDLVSTDFQGDNRSSIFD  | T | 286  |
| 8718 | LOC_Os04g41820 | TSSENSDLKIRVQTMEQQVRLQDALN | T | 337  |
| 8719 | LOC_Os04g42010 | SEEEEANAVLKNTLVFAEADLEIKP  | T | 184  |
| 8720 | LOC_Os04g42140 | DLLKGQLMESGITTADILKDVISLI  | T | 236  |
| 8721 | LOC_Os04g42600 | RNVAQQHNANTPTSQLAALSLGDAI  | T | 645  |
| 8723 | LOC_Os04g43130 | KKAVLWNMETFQTQYTAEHVIIT    | T | 550  |
| 8727 | LOC_Os04g44740 | AASPD MAYLLNGTPAEAWLGAVQRG | T | 249  |
| 8728 | LOC_Os04g44960 | LRNVRWPPRFRPTIAEKYDGSVNPA  | T | 240  |
| 8729 | LOC_Os04g44960 | WIAEQIAYLTDKTLPEDREGSERVL  | T | 1629 |
| 8731 | LOC_Os04g45570 | GGGAGGEVVERWTVVCEPWPDAAG   | T | 107  |
| 8733 | LOC_Os04g46500 | NFQGTYP RPVRNTIPCIPAHAVIYA | T | 221  |
| 8735 | LOC_Os04g47240 | TSPISVPRSPGRTENPPSPGSRWKK  | T | 399  |
| 8736 | LOC_Os04g47250 | AANLRRTRGTYQTCIFAVPGLARRG  | T | 66   |
| 8737 | LOC_Os04g47320 | CLLVATVIRLVKTLKKVLASSFHV   | T | 451  |
| 8738 | LOC_Os04g47330 | EAALKGYVRRRVTPAIGDAEFVVVY  | T | 61   |
| 8739 | LOC_Os04g47700 | KKKGIFGMIMKDTKASKGKQSDANG  | T | 571  |
| 8740 | LOC_Os04g47740 | DDGEPNRRRRARTPPPPRQSPRRE   | T | 29   |
| 8745 | LOC_Os04g49060 | AEDDDEKVAALLTQLHLENSGAGEV  | T | 302  |
| 8746 | LOC_Os04g49194 | PSNPAQFKEIMSTYCREVRQLGLRL  | T | 155  |
| 8747 | LOC_Os04g50890 | IKEGDSKLFFLATIIYALLGIPLSYL | T | 164  |
| 8749 | LOC_Os04g51370 | CSYPWKNSLETETEKAEERVILVDFL | T | 431  |
| 8750 | LOC_Os04g51390 | RVALPGGDLALTSRIRNTNTDGRP   | T | 159  |
| 8751 | LOC_Os04g51580 | AWLPKLVKYSTFTARMTPGRTRVHE  | T | 299  |
| 8753 | LOC_Os04g52050 | NEEPTAADLFLLTHTHRNGKPMKKE  | T | 808  |
| 8754 | LOC_Os04g52180 | KSLRSKREKRLRTLREIAQPFYDK   | T | 15   |

|      |                |                            |   |      |
|------|----------------|----------------------------|---|------|
| 8755 | LOC_Os04g52200 | TRVFALVVFVEATEARHAFKKLLYT  | T | 608  |
| 8757 | LOC_Os04g52540 | KAIKTKDYSPTITVIVAKKRHHTRL  | T | 874  |
| 8758 | LOC_Os04g52570 | GDDRDFDANNL TARVPSWKDEVSS  | T | 147  |
| 8759 | LOC_Os04g52570 | TSPTKSLSEVHSTFSSWHGSSSHQY  | T | 216  |
| 8760 | LOC_Os04g52820 | TRVYDDPEEEEGTTLDEAGNFNDNL  | T | 42   |
| 8765 | LOC_Os04g54680 | KRKVEDQGPLKKTIRS NKESNDEIN | T | 403  |
| 8768 | LOC_Os04g55150 | LLEGVVAYHNGNTVKARESLSAQA   | T | 284  |
| 8769 | LOC_Os04g55220 | QLAATIASFSKMTIEDSRKLLPADL  | T | 46   |
| 8770 | LOC_Os04g55450 | QGGCPWRVHGYKTQHDTLWVASRVE  | T | 295  |
| 8771 | LOC_Os04g55450 | TQETEAGQGPDVTPQQAARDRHPPD  | T | 1558 |
| 8772 | LOC_Os04g55500 | NMAKPEHAIQPCTTSCDTKVENTKS  | T | 216  |
| 8777 | LOC_Os04g57140 | EDMLCFQKDPIPTSLKKISSDLVSR  | T | 42   |
| 8779 | LOC_Os04g57520 | RASTNLEYESDKTFKEAGLANSMIN  | T | 443  |
| 8780 | LOC_Os04g57600 | RHPPIDGMFGAPTTGMPAVSSHYAP  | T | 96   |
| 8782 | LOC_Os04g58280 | TNEALLVIEAYRTLDRGPYPADQS   | T | 116  |
| 8783 | LOC_Os04g58720 | GILGAQGIVPMKTRDGKGSSDTYCV  | T | 615  |
| 8784 | LOC_Os04g58750 | RDGKSYSTNLAFTPPEYMRTGRITP  | T | 85   |
| 8786 | LOC_Os04g59100 | HPRSNQVERANTEILKGLKTKTFN   | T | 1531 |
| 8787 | LOC_Os04g59100 | RSYIQRFCQVRNTIPCIPAHAVIYA  | T | 234  |
| 8788 | LOC_Os04g59290 | RMLEKIASKEPQTTTELFQLADRVA  | T | 359  |
| 8789 | LOC_Os04g59330 | SGSMAPVPMILRTTVHSRAYVLGAL  | T | 270  |
| 8790 | LOC_Os04g59400 | ETEEMLLNQGSTSVQVLENYNMNG   | T | 397  |
| 8792 | LOC_Os04g59550 | WIFQKLDFKFPLTVSCVHFICSSIG  | T | 74   |
| 8793 | LOC_Os04g59570 | KRGHPPPPPRRTRTRGP PARPQQS  | T | 70   |
| 8794 | LOC_Os04g59624 | LQVFKGALFRTATEHKEQTRYFSKR  | T | 393  |
| 8796 | LOC_Os05g01040 | EWARPLLTQAIETGNLEELVDPRLE  | T | 293  |
| 8797 | LOC_Os05g01350 | VEALRMLMQMVL TNEEELKLKYFKD | T | 521  |
| 8798 | LOC_Os05g01400 | WITEIQAYLADKTLPEHREGSERVQ  | T | 1470 |
| 8799 | LOC_Os05g01590 | KWKNFDEDDCSDTPYGNFGGKRSFT  | T | 105  |
| 8800 | LOC_Os05g01910 | EAILTRIKAHLNTLKKYTYGKHIVA  | T | 847  |
| 8801 | LOC_Os05g01990 | EDKEGLFASCSFTDLGLHPTLCAHL  | T | 26   |
| 8802 | LOC_Os05g02060 | VAIDMGNPFLNRTVDGFLKIGAVGA  | T | 29   |
| 8803 | LOC_Os05g02260 | SLPEKHSALADATSGVAAENADNLS  | T | 42   |
| 8804 | LOC_Os05g02670 | PIVNEVLEGYNCTIFAYGQTGTGKT  | T | 130  |
| 8805 | LOC_Os05g02680 | AVRKAMATPTEDTL SAKQPDGEESR | T | 823  |
| 8807 | LOC_Os05g03430 | NTDDRPPQQHNATDVI VLSDSDEEN | T | 601  |
| 8808 | LOC_Os05g03720 | GFEYLYVAVDKFTKWPEAYPV IKID | T | 1354 |
| 8809 | LOC_Os05g03740 | AIRADLDHSFLSTKR NKALWEAASA | T | 80   |
| 8810 | LOC_Os05g03820 | GSLGLDMMFRTCTVQVNLDFSSEQD  | T | 222  |
| 8811 | LOC_Os05g04950 | EENFLHLKAENDTQRYKSQIRALEQ  | T | 738  |
| 8813 | LOC_Os05g05700 | ENDFEDFLLKDTTDYYS LKAQSWIL | T | 204  |
| 8814 | LOC_Os05g05950 | LVLGKIGVGKSATINS IFGEEKSKT | T | 684  |
| 8815 | LOC_Os05g06280 | DNYNAVANEKESTARENNVAKIKVV  | T | 183  |

|      |                |                            |   |      |
|------|----------------|----------------------------|---|------|
| 8816 | LOC_Os05g06630 | SWDGATKRAMIVTLFTYFKKKPHEP  | T | 197  |
| 8817 | LOC_Os05g07120 | EVTVQCYAGGEHTAAARTYVRATVS  | T | 148  |
| 8818 | LOC_Os05g07130 | WALSFVPPDHETLDFKFLLKPKDA   | T | 105  |
| 8819 | LOC_Os05g07220 | SLAYPDQHVPEETQVTAGISCPDQH  | T | 632  |
| 8822 | LOC_Os05g08600 | SSDYFKELYRLKTYHEVIDEIYNQV  | T | 36   |
| 8824 | LOC_Os05g09630 | VATSPKSMQLGQTLALEVLDLLKTA  | T | 39   |
| 8825 | LOC_Os05g11370 | HSDDDVDVLINNTLVGIKNTLEKPI  | T | 271  |
| 8826 | LOC_Os05g11370 | TLAINSKYGTTYTVQVQHHYRRHK   | T | 75   |
| 8827 | LOC_Os05g11730 | RYYRAPELIFGATEYTTSDIWSAG   | T | 239  |
| 8829 | LOC_Os05g11780 | LSAGLLRQATYTTARLGSFRVLTNK  | T | 89   |
| 8831 | LOC_Os05g11980 | TQLGLRNAMEKRRTKVPEAPLSAQEL | T | 934  |
| 8832 | LOC_Os05g12290 | SLLSKKLQELGFTPSKADTSLFFFN  | T | 806  |
| 8834 | LOC_Os05g13520 | ALSGRLARNVLLTGKVLNGKKRRL   | T | 100  |
| 8836 | LOC_Os05g14750 | LLVKEPHKRIAFTRGATEIKQHPFF  | T | 490  |
| 8837 | LOC_Os05g14770 | QAYDRTGEEYILTLKYIKANNSYRL  | T | 328  |
| 8840 | LOC_Os05g16640 | GGMSKPSGSVEVTTEATTSGQVGAK  | T | 240  |
| 8842 | LOC_Os05g17100 | GPASLWWDHFQATQPEGQPITWARF  | T | 424  |
| 8843 | LOC_Os05g17750 | SFWDYALGTAAFTLNRVPSKSVDKT  | T | 365  |
| 8844 | LOC_Os05g17940 | ATGAEQVVADIETDDWRTLLNKFL   | T | 124  |
| 8845 | LOC_Os05g19020 | VLTASFNSLLRWTITALQAKFSMKD  | T | 195  |
| 8846 | LOC_Os05g19100 | TPQSSSKPLGKITLPMTFGQANNFR  | T | 673  |
| 8847 | LOC_Os05g20100 | ARGDLVVCPEGTTCREPYLLRFSPL  | T | 413  |
| 8848 | LOC_Os05g20100 | DLESWLLRSPMSTFPYFMIVAIEAG  | T | 68   |
| 8850 | LOC_Os05g22390 | KYSKCWNPIRPPTLLTSNGHRICI   | T | 1468 |
| 8851 | LOC_Os05g22390 | PFPVNMVHTAGQTADRARARGFRVN  | T | 299  |
| 8853 | LOC_Os05g22580 | KKWEDWKKDWFYTALPDHPRRLPT   | T | 158  |
| 8854 | LOC_Os05g22870 | KKGIASNTSMYNTLINAYCKANQIE  | T | 414  |
| 8855 | LOC_Os05g22920 | EQLNQLPSKEHGTNVMRIRPWYLDQ  | T | 429  |
| 8858 | LOC_Os05g23610 | EIESNKPVRQKITEPKTPYHPMVDD  | T | 27   |
| 8859 | LOC_Os05g23610 | NKPVRQKITEPKTPYHPMVDDGSL   | T | 31   |
| 8860 | LOC_Os05g23860 | QGFARLSAVYGGTYMLNKPDCCKVEF | T | 248  |
| 8862 | LOC_Os05g25750 | ELTPDQPFHGITPQSSSKPLGKIT   | T | 663  |
| 8863 | LOC_Os05g26890 | PDRVDRVFKIYRTTALDQKLVKKTF  | T | 317  |
| 8864 | LOC_Os05g27820 | FSVLFSMISPFLTERTKSKFVIARE  | T | 281  |
| 8865 | LOC_Os05g28190 | EDNSKASDIEDKTAKEGDAEEEDGA  | T | 193  |
| 8866 | LOC_Os05g28280 | DNAEIKAWLALGTTKTKKSGAKKKK  | T | 359  |
| 8867 | LOC_Os05g28430 | EAKIRASIRAELTSEFDEKLESMRA  | T | 268  |
| 8869 | LOC_Os05g30420 | DYKAMFMDIKLNTMQHSVGTLLKLC  | T | 168  |
| 8871 | LOC_Os05g30530 | ILILRNRLKYALTYREVISILMQRH  | T | 57   |
| 8873 | LOC_Os05g30980 | HKLFIGMLPKNVTDAMTDLFSQYG   | T | 146  |
| 8875 | LOC_Os05g31056 | AFSHSNHSSSFSTSGNDMPSPFSFKT | T | 203  |
| 8876 | LOC_Os05g31056 | SPQSSVSTQRRNTRRKVRTKSGQLP  | T | 476  |
| 8877 | LOC_Os05g32360 | LTGLADRPGRMFTVPQIKCYMKQLL  | T | 137  |

|      |                |                            |   |      |
|------|----------------|----------------------------|---|------|
| 8878 | LOC_Os05g32580 | RCYWGYSFENLATENSIDEDGRGID  | T | 349  |
| 8879 | LOC_Os05g32960 | SRGHAVPRMFYRTTIATGGYARDLA  | T | 505  |
| 8880 | LOC_Os05g33030 | QEVAGLIEAPIYTTIDGVWEKLKVGA | T | 351  |
| 8881 | LOC_Os05g33380 | ENRRSLRELLFCTPGALQYLSGVIL  | T | 62   |
| 8882 | LOC_Os05g33570 | TEACQQYQAAGKTLPAGLWEEIVEG  | T | 132  |
| 8883 | LOC_Os05g33940 | RVFDDGTVDRTWTGPPEVLPLMQPV  | T | 50   |
| 8884 | LOC_Os05g34090 | HTWPLGHIDLPTVTFGGSANFRTERV | T | 635  |
| 8885 | LOC_Os05g34540 | VAPKGFIAFVSTEADTHPESELK    | T | 356  |
| 8886 | LOC_Os05g34780 | TGGDSGAHARRRTAALRHERRAPTG  | T | 503  |
| 8887 | LOC_Os05g34780 | VLRRSSAATKRRTTAATWRPRRRS   | T | 565  |
| 8889 | LOC_Os05g36350 | YAAARRWSDVASTRKAIRSRSMRKT  | T | 477  |
| 8890 | LOC_Os05g37500 | IPKLVLQIVTVETLLRLHKPNNELA  | T | 1454 |
| 8893 | LOC_Os05g37930 | DGERDAPPKAEVTVGSPQSTLCGLP  | T | 71   |
| 8894 | LOC_Os05g38160 | ISIAFLNDSFAVTFNEKVTRTVRQF  | T | 97   |
| 8897 | LOC_Os05g39390 | FRSSAGVGIILPTKLFRVEVNYCYI  | T | 487  |
| 8898 | LOC_Os05g39520 | WVMNVVPVGQPDTLPIFNRLIGV    | T | 547  |
| 8901 | LOC_Os05g39780 | NVLNTPAWGLHITPRAPEQGHTQHT  | T | 972  |
| 8902 | LOC_Os05g39780 | YYGAYLRWYRSVTRWRCFPPQGDST  | T | 772  |
| 8903 | LOC_Os05g39810 | AASKITVGDGNTTRFWD SAWINGR  | T | 750  |
| 8904 | LOC_Os05g40060 | ESSSADTKRKPATAPSTRRRRRAT   | T | 93   |
| 8907 | LOC_Os05g40420 | DADQYNCIHVAETPTMSLKKGAPE   | T | 46   |
| 8908 | LOC_Os05g40820 | DIHAEAVKKRRRTTKKPYSRSIVGA  | T | 76   |
| 8910 | LOC_Os05g41172 | GILPTFGSTTAFTTTANGVSYTSYT  | T | 72   |
| 8911 | LOC_Os05g41172 | NLDDSEDDYIFQTVCPGEKTLKFNF  | T | 554  |
| 8912 | LOC_Os05g41210 | FSLFDKDGDCITTKELGTVMRSLG   | T | 29   |
| 8915 | LOC_Os05g41510 | GRYLQNPLAMAATLCGPGEILSWK   | T | 901  |
| 8916 | LOC_Os05g41670 | GFRSFLKETLKETVRDAFESRGVHI  | T | 190  |
| 8919 | LOC_Os05g42320 | HQIRMAREDEEKTAFITPIGYCYT   | T | 869  |
| 8920 | LOC_Os05g43280 | SAEGTTDAKANGTPNKDEPVTNCVA  | T | 712  |
| 8921 | LOC_Os05g43670 | AHFRRLARRSRTLRLKELAVLRS    | T | 225  |
| 8924 | LOC_Os05g43970 | ESDNFQKNKHKGTEGLIEIENPNLV  | T | 76   |
| 8925 | LOC_Os05g43970 | RSFSSEEQIAAGTSAGRPNFKKKQ   | T | 26   |
| 8926 | LOC_Os05g44270 | SSSQPALPPSPRTVVPRTIDTTPFP  | T | 67   |
| 8928 | LOC_Os05g44380 | GALPRPYDPKANTNVIRDANRRATG  | T | 321  |
| 8930 | LOC_Os05g45660 | KREGSGRGNWGTTTDEILAQETGEA  | T | 186  |
| 8931 | LOC_Os05g45740 | ERCQELSKQLFYTRLASLPGRYEF   | T | 60   |
| 8933 | LOC_Os05g46340 | FTLYSFRSGDLATDDIPADAAAAAT  | T | 274  |
| 8936 | LOC_Os05g46720 | LDRFARPCFEGFTHNDEKKEIRSDA  | T | 17   |
| 8939 | LOC_Os05g47640 | LYRYYKSGWTEFTPQVAEPTFASAI  | T | 383  |
| 8941 | LOC_Os05g47980 | LGMDELSEDDKLTVARARKIQRFLS  | T | 476  |
| 8942 | LOC_Os05g48020 | EKVDRANDTLKNTNVLKETVLQLR   | T | 228  |
| 8943 | LOC_Os05g48020 | LQRLALKKVKGLTKEELATRSDLVA  | T | 100  |
| 8944 | LOC_Os05g48310 | RQGQVRVRLYVRGTILGYKRSKSNQY | T | 16   |

|      |                |                            |   |      |
|------|----------------|----------------------------|---|------|
| 8946 | LOC_Os05g48980 | SALESMNVENAFTEVLTQIYHVVS   | T | 167  |
| 8947 | LOC_Os05g49050 | PLISRRFAERAFTVGIGGPVGTGKT  | T | 84   |
| 8949 | LOC_Os05g50530 | TEDGPMFLKAIYTEGEIKRKEYIAE  | T | 311  |
| 8950 | LOC_Os05g51280 | TRNKIPKERFRITAVDAVGLPTSPR  | T | 35   |
| 8951 | LOC_Os05g51500 | LVVDIMHGLEPQTIESLNLLKSRDA  | T | 720  |
| 8952 | LOC_Os05g51690 | QPPDAASCIYTTALPLIADPPDIL   | T | 32   |
| 8953 | LOC_Os05g51690 | QQPPDAASCIYTTALPLIADPPDI   | T | 31   |
| 8956 | LOC_Os06g01680 | SKDAPVSIRGSATSGPNYEFATGK   | T | 685  |
| 8957 | LOC_Os06g02028 | AVKEYDDGKDLTTYDFEADCFSSPY  | T | 100  |
| 8958 | LOC_Os06g02130 | GKEGEKPDREVSTNLTNGKLQPN    | T | 342  |
| 8960 | LOC_Os06g02380 | GTAAKVVLNKESTTIVGDGSTQEEV  | T | 385  |
| 8961 | LOC_Os06g03310 | SSGGLSPWSPRTSEPFMEKLEVQL   | T | 1078 |
| 8963 | LOC_Os06g03676 | RTIALQEHELEHTASLLGEIGSNED  | T | 439  |
| 8964 | LOC_Os06g03780 | HLDNLTEEMEEKTENIVYEDFKFLT  | T | 374  |
| 8965 | LOC_Os06g04560 | LSMTASDAEDPQTLRMVAGAIANLC  | T | 733  |
| 8966 | LOC_Os06g04660 | EPQRWMRGKGRVTIQFGCCYNYATD  | T | 255  |
| 8967 | LOC_Os06g04660 | HIDSHDFVRPFCTVSFLSECNILFG  | T | 336  |
| 8970 | LOC_Os06g05180 | SGSVCIWDYQSQTVMKSFEVSELPV  | T | 48   |
| 8973 | LOC_Os06g05530 | CFVEFSDAKCAITAMEALQEYRFDE  | T | 187  |
| 8974 | LOC_Os06g05660 | EAKYQKLYEPLYTKRYNIVNGVVEV  | T | 99   |
| 8975 | LOC_Os06g05660 | KKGSKNAKPITKTEVCESFFNFFSP  | T | 246  |
| 8976 | LOC_Os06g05850 | DELSRLASSRAQTPLGAFEERLAQP  | T | 1446 |
| 8977 | LOC_Os06g05850 | KSQALADFVAEWTPAPEPVSIPAS   | T | 1345 |
| 8978 | LOC_Os06g05870 | PRLQKLGVIYVITLNEPFETLVPSS  | T | 87   |
| 8979 | LOC_Os06g06530 | GPKLTPTTSVATPGDPVVDKYISM   | T | 156  |
| 8981 | LOC_Os06g06830 | PFTWTTEEAERALTQLKAYLSSPPVL | T | 1012 |
| 8982 | LOC_Os06g08023 | FFQQHLGEKQKYTNLIDGKHQLEG   | T | 106  |
| 8984 | LOC_Os06g08550 | PALTTYDIQLVLTLVGRFMRRAGVT  | T | 350  |
| 8985 | LOC_Os06g08740 | DPQPRKHTLWQATSDFTGGQASMR   | T | 232  |
| 8986 | LOC_Os06g08740 | EGSDEEFSSAASTVKTTPAQPPAM   | T | 496  |
| 8987 | LOC_Os06g08790 | CHQKTNLEKAKATLLLATLPKSLPC  | T | 426  |
| 8988 | LOC_Os06g08850 | WWGLQNLSCYGGTLTVSTYIGETLY  | T | 358  |
| 8989 | LOC_Os06g09450 | IIGNYSDGNLVATLLAHKLGVTQCT  | T | 418  |
| 8990 | LOC_Os06g09880 | APALPKTNSMKLTEGYFMRAGLVPV  | T | 1354 |
| 8991 | LOC_Os06g11610 | ATAAAPGTNGLATAAARRGGWWVAK  | T | 140  |
| 8992 | LOC_Os06g11970 | NMLTQLKCESDVTEDLTNTSSKAPV  | T | 102  |
| 8993 | LOC_Os06g12030 | EQPTGKGRIIYTKLGCEDCKMVRS   | T | 249  |
| 8994 | LOC_Os06g12030 | SSDPMEPTDSSQTEEDILAEDKSEE  | T | 88   |
| 8995 | LOC_Os06g12080 | DGELDFYSAVALTEKKFLDKFVHSC  | T | 346  |
| 8996 | LOC_Os06g12970 | TELGAISKIRGRTTRLRISMYADDA  | T | 56   |
| 8998 | LOC_Os06g13720 | VLVCENNHYGMGTAEWRASKSPAYY  | T | 240  |
| 8999 | LOC_Os06g13810 | TIDGLKCKEVPTSFQFDTACKIYS   | T | 239  |
| 9000 | LOC_Os06g14080 | KLQDDNRALDRLTKQKEAALLDAER  | T | 177  |

|      |                |                            |   |      |
|------|----------------|----------------------------|---|------|
| 9001 | LOC_Os06g14160 | GRSSATKASGAATTSSASSRRRRARR | T | 54   |
| 9002 | LOC_Os06g14490 | IQEGSSPTPPSDTHSEATSEAKSAG  | T | 407  |
| 9003 | LOC_Os06g14510 | VQGFNSSTASLLTRYLAVEPSTPYN  | T | 548  |
| 9004 | LOC_Os06g14510 | WGVKDKIKQFSETFRSGSWVGATGK  | T | 132  |
| 9005 | LOC_Os06g16160 | DPARFLSSMRGKTLAFIGDSLARNH  | T | 139  |
| 9006 | LOC_Os06g16160 | GKEAARMLLMDATEAMAQRPDGHPS  | T | 772  |
| 9007 | LOC_Os06g16250 | ESEDGAPEMAATEAEFYRAQVEEF   | T | 411  |
| 9009 | LOC_Os06g17290 | LAVQLDRGDNAHTVKKRLQLALNVP  | T | 114  |
| 9010 | LOC_Os06g17820 | VDDL VVKTRNQETLLSDLAETFESL | T | 993  |
| 9012 | LOC_Os06g19090 | FGDHYILFLVYPTDQTVVVLDPADY  | T | 459  |
| 9013 | LOC_Os06g19390 | VTVVHLIIMDYGTTVIQEDIPGYNG  | T | 585  |
| 9014 | LOC_Os06g19650 | PGATSDAAVTAETVDASEKSSDPQT  | T | 285  |
| 9016 | LOC_Os06g20370 | YSKMKEIAFKKQTELEDIYAGAHMV  | T | 318  |
| 9017 | LOC_Os06g20840 | ILTQFGMLHCNSTSIPIEHRSQLHK  | T | 309  |
| 9018 | LOC_Os06g21350 | CYYKANVDGFSATDFHCHWPHGHRR  | T | 30   |
| 9020 | LOC_Os06g21580 | DKVVDQAEAKNLTEGDDGDADYQQG  | T | 55   |
| 9021 | LOC_Os06g22070 | FEIIDNPGDQSITLKREIAGETIKA  | T | 126  |
| 9022 | LOC_Os06g22100 | QPGASPPGSLVATMRGQFEILSLTG  | T | 166  |
| 9023 | LOC_Os06g22650 | QPSPYSNGLTSNTMAPYDQPSDINA  | T | 431  |
| 9026 | LOC_Os06g24540 | VMQGWVVEEEESTVVVGEVEVEKKD  | T | 285  |
| 9028 | LOC_Os06g24810 | KAPEPNGGLRPLTTGVGPLACPTT   | T | 1243 |
| 9030 | LOC_Os06g26190 | NLETSTLEDENDTFEHESFSFKFPQ  | T | 93   |
| 9031 | LOC_Os06g26190 | RNKSIAKTDKGETYHLSRCTEIKRD  | T | 218  |
| 9032 | LOC_Os06g27600 | RRASRRELLEPGTFLDILMKPSVKE  | T | 240  |
| 9034 | LOC_Os06g27830 | CPNAACGSSQGLTDRCVRHGGGRRRC | T | 208  |
| 9035 | LOC_Os06g27970 | QFNELYKHMDGLTNDVERSNEMLAI  | T | 286  |
| 9037 | LOC_Os06g28100 | VYFVSEALRDANTRYPPAQKMLYAI  | T | 1289 |
| 9038 | LOC_Os06g28140 | EVYVKRLQSDKLTPKSDKCFFVGYP  | T | 438  |
| 9040 | LOC_Os06g29410 | KSRKVHSSPQRITLDKPEAKGRGRG  | T | 548  |
| 9041 | LOC_Os06g29410 | LQTRNQHPHLGTAGYAGKDEEWQR   | T | 172  |
| 9042 | LOC_Os06g29430 | EDDANLASSSKNTMISKHHNTVDQK  | T | 538  |
| 9043 | LOC_Os06g30320 | SENERLRAELNHTLSSINLYKEYKK  | T | 817  |
| 9044 | LOC_Os06g30570 | APQAPPPAHRRAKKAKIDAAKNKD   | T | 643  |
| 9045 | LOC_Os06g30750 | LTLIYVAVLMLHTVPILYDKYQDKV  | T | 217  |
| 9049 | LOC_Os06g31250 | KFDATYNAIIGRALAKFMAVSHYA   | T | 674  |
| 9050 | LOC_Os06g31250 | VFCYVKMPFGLITVGNFTQCTVQGA  | T | 887  |
| 9051 | LOC_Os06g33520 | DVLAKAKTGTGKTVAFLPAIEVVS   | T | 506  |
| 9052 | LOC_Os06g33520 | LPKQRQTLLFSATVPDEVRQVCHIA  | T | 650  |
| 9054 | LOC_Os06g34440 | EVKYNEDSDGDDTDCHGNDDGFVS   | T | 372  |
| 9055 | LOC_Os06g34440 | NADTTGPGHDGPTNGVNNYNTEDI   | T | 420  |
| 9056 | LOC_Os06g35530 | GNDPVTGHHIISTTIGGKNDEPKRTI | T | 57   |
| 9057 | LOC_Os06g35530 | HGPTIMGGNDPVTGHHIISTTIGGKN | T | 50   |
| 9058 | LOC_Os06g35730 | RCKSRVGIQHRVTKEDAMKWFQVKY  | T | 157  |

|      |                |                            |   |      |
|------|----------------|----------------------------|---|------|
| 9060 | LOC_Os06g36360 | DQMVVEANAVLFTFGSYRLGVHGP   | T | 99   |
| 9061 | LOC_Os06g36360 | RLGVHGPADIDTLCVGPSYVREE    | T | 116  |
| 9062 | LOC_Os06g36700 | IAAGKAVARILRTSLGPKGMDKMLQ  | T | 46   |
| 9063 | LOC_Os06g36700 | PKPKTKHKVDIDTVEKFQMLREQEQ  | T | 266  |
| 9064 | LOC_Os06g36730 | KRHAIEDDLHALTQNPGESLRDYVQ  | T | 540  |
| 9065 | LOC_Os06g36920 | AGSPLHQKGLFFTSVMRERLCRDA   | T | 130  |
| 9066 | LOC_Os06g36920 | LLSRVPATADWRTARANERLRARVG  | T | 283  |
| 9067 | LOC_Os06g37440 | LDEWKRLYSNTKTNFREIAIKGFW   | T | 282  |
| 9068 | LOC_Os06g38470 | VEEAFYTTDRVMTVSFHKFGDYFPG  | T | 207  |
| 9070 | LOC_Os06g38500 | MPSPAAAAAALATVLAGGGGARTRQ  | T | 13   |
| 9072 | LOC_Os06g39344 | STAASASKTLAPTLTFRFAAMAAA   | T | 46   |
| 9073 | LOC_Os06g40440 | ALALYAGLVWETTRDADRDAYFTR   | T | 215  |
| 9074 | LOC_Os06g40480 | RLASSRAQTTPGTFEERLAQPSARP  | T | 1569 |
| 9075 | LOC_Os06g40640 | NAMNKLEVLKPWTLTFSFGRALQQS  | T | 321  |
| 9077 | LOC_Os06g40950 | MGQFSTSPFGKMTFETATKFIVEAA  | T | 299  |
| 9078 | LOC_Os06g40950 | TSPFGKMTFETATKFIVEAASHGES  | T | 304  |
| 9079 | LOC_Os06g41120 | SPLDLAGGGGATTWMAATWMMGR    | T | 41   |
| 9082 | LOC_Os06g41860 | LPGRFELLSVTGTVLPPPAPPASG   | T | 138  |
| 9083 | LOC_Os06g42190 | ATRRARWSEVALTFDQTDHPPCVAR  | T | 595  |
| 9084 | LOC_Os06g42200 | AAHEAACAEFEFTLRLREDALTERE  | T | 784  |
| 9087 | LOC_Os06g43270 | RSRKLKNTCSPTTMEVPDGTIVGME  | T | 367  |
| 9089 | LOC_Os06g43460 | QRISKCYVLVEGTLYRRAANGILLK  | T | 1580 |
| 9091 | LOC_Os06g43790 | KQPKVLGDQQRPTELRSGQEPRKTR  | T | 1556 |
| 9092 | LOC_Os06g43840 | GSLRTALLKNAKTLDKRKRLIAMD   | T | 938  |
| 9093 | LOC_Os06g44130 | ISIERRRGVC GTTACSKRSPPRSPR | T | 190  |
| 9094 | LOC_Os06g44200 | FRGGLRPPPPPTPFGWEEAARLER   | T | 63   |
| 9095 | LOC_Os06g44890 | ENSSQETPVYVITEGSEPQFFTRFF  | T | 752  |
| 9096 | LOC_Os06g44890 | NPVTDIDVTKRETYLSAAEFRERFG  | T | 980  |
| 9099 | LOC_Os06g45120 | SPRPVSSKLAADTPLL TGQRVLDAL | T | 224  |
| 9100 | LOC_Os06g45360 | FGDKGYLA FEHITWTPYQTKLIDTT | T | 592  |
| 9102 | LOC_Os06g45870 | LSRWLKSSPAGNTNQMYDENNLIEE  | T | 321  |
| 9103 | LOC_Os06g45990 | AAAAAAEVAAPETKEVTAKAAADEA  | T | 22   |
| 9104 | LOC_Os06g46366 | VPGTPSEGQQDNTSTLRSFSFRKVI  | T | 119  |
| 9105 | LOC_Os06g46400 | LPNQNSIDNTTTTAAQPAVGQQAQT  | T | 197  |
| 9108 | LOC_Os06g47320 | AIMIVRRALKNSTVVPGGGAIDMEI  | T | 407  |
| 9109 | LOC_Os06g47320 | DKGGTTISNDGATIMRLLDIHPAA   | T | 67   |
| 9110 | LOC_Os06g47330 | QLVSLAQAGDEITQDSLKRDDLGS   | T | 90   |
| 9111 | LOC_Os06g47340 | WMGAVSVGILAHGTADQPRLSEED   | T | 327  |
| 9112 | LOC_Os06g47730 | FPPSPFLLSLSHTFLLSRQAASWPL  | T | 21   |
| 9113 | LOC_Os06g47950 | KMVGSGFMPRTTMLMKVFCENA     | T | 375  |
| 9114 | LOC_Os06g48534 | TPMMRRGPDGPRTL CNACGLMWANK | T | 231  |
| 9115 | LOC_Os06g48640 | ILGKYHYMLYILTLAMQPRMLLTVD  | T | 814  |
| 9116 | LOC_Os06g48640 | QESVEATAEVSKTFDEKIRNYCDVT  | T | 597  |

|      |                |                            |   |      |
|------|----------------|----------------------------|---|------|
| 9117 | LOC_Os06g48750 | TVSATHGDMQDQNRDIIMREFRSGS  | T | 318  |
| 9118 | LOC_Os06g48780 | YTFVCRSSGDEWTAKQLKGELEASA  | T | 16   |
| 9120 | LOC_Os06g49090 | ELHAHSQGSTSATIKVTSQGAFVNV  | T | 763  |
| 9121 | LOC_Os06g49430 | NDQERSADSVARTTVSPPMQDAQQ   | T | 504  |
| 9122 | LOC_Os06g49500 | NVLAGTWSSNSYTPQWLTSAMLQYG  | T | 216  |
| 9124 | LOC_Os06g49800 | ISDAIDLLPRLATGIDVNVMFVKID  | T | 136  |
| 9125 | LOC_Os06g49800 | ISSELTTAASQDTPNHATKELDGED  | T | 447  |
| 9126 | LOC_Os06g49830 | SRGFSCATHVKSTWVPAAKRRERQQ  | T | 167  |
| 9127 | LOC_Os06g50030 | SAVVKKGEYKGQTVAVKIIAKAKMT  | T | 200  |
| 9129 | LOC_Os06g50539 | TTTIPTSTSADPTSYLEWVRRSREP  | T | 302  |
| 9135 | LOC_Os06g51420 | SLPKFEDPISAETTEPKQVENPFGN  | T | 118  |
| 9137 | LOC_Os07g01870 | KAKVAYERRKQLTRLRVKAEKAAEE  | T | 180  |
| 9140 | LOC_Os07g02230 | SEQIPDFDLLYPTELLNSIDTNNFP  | T | 1249 |
| 9141 | LOC_Os07g03180 | CMEKGACYKKRLTCPEKCFKSFSFK  | T | 99   |
| 9142 | LOC_Os07g03230 | MDKQFLKDPSEITWDIVDKKLKEIV  | T | 254  |
| 9143 | LOC_Os07g03230 | PTKCIIFHNVDQTRLQGLLFQMSDK  | T | 800  |
| 9145 | LOC_Os07g05050 | HANGGKCIVFTQTKREADRLAYAMG  | T | 337  |
| 9147 | LOC_Os07g05610 | SSTSTGLSGWQLTVDALETIQSLAQ  | T | 896  |
| 9149 | LOC_Os07g06175 | YEAQAEPLDPTFTIRQLIDNFARKN  | T | 164  |
| 9150 | LOC_Os07g06286 | RQLIDNFARKNFTVEELVVLGAHS   | T | 116  |
| 9151 | LOC_Os07g07194 | SFKDSYGKDKIDTREHRLRFVDSSP  | T | 238  |
| 9152 | LOC_Os07g08330 | QPYAVSRRAGHQTSAESWGTGRAVS  | T | 66   |
| 9156 | LOC_Os07g09060 | FGAAGQRCMALSTAVFVGSEPWED   | T | 323  |
| 9157 | LOC_Os07g09384 | YKTPSRGSPVPTPALAPASPPHR    | T | 180  |
| 9158 | LOC_Os07g09890 | QTSIDSGILIKWTKGFAVSGTAGKD  | T | 204  |
| 9159 | LOC_Os07g10110 | FGDESCYASELVTWATKQVMSFALL  | T | 331  |
| 9160 | LOC_Os07g10200 | VAVLSFRQLRTETMGHGGSDLGYEG  | T | 43   |
| 9163 | LOC_Os07g10540 | TDITRTVHFGEPTPRQKECFTRVLQ  | T | 540  |
| 9165 | LOC_Os07g10890 | PPEPPAAAAVAGTAVATAAAAVPTH  | T | 23   |
| 9166 | LOC_Os07g11290 | ASRSQENEPNADTQVEEKWERRVQG  | T | 181  |
| 9167 | LOC_Os07g11290 | VRHRPNSRFLTATVRGVQQANRVVE  | T | 60   |
| 9168 | LOC_Os07g12170 | KIRPLWRHYFQNTQGLIFVVDNDR   | T | 208  |
| 9169 | LOC_Os07g12250 | RYFHNRLKPAKLWTAMYRKQHKKD   | T | 52   |
| 9170 | LOC_Os07g12250 | SALREIKERIKKTKDEKKAKKAEVA  | T | 122  |
| 9171 | LOC_Os07g13340 | DESFP RPRIPTLAQFMPRNWGQL   | T | 1296 |
| 9172 | LOC_Os07g13340 | TAFRTPKGNFYTVMPFRLKNAGAT   | T | 2030 |
| 9177 | LOC_Os07g20150 | DSDAQELGLFHETEEEFEEQSVRAD  | T | 441  |
| 9179 | LOC_Os07g20580 | TASVRQTVMF SATWPPAVHQLAQEF | T | 281  |
| 9180 | LOC_Os07g22610 | GRCGADVGP TAITTTTPTFQRGSEW | T | 1283 |
| 9181 | LOC_Os07g22610 | PQYSWGS AVLAVTYAGLCDACVRNS | T | 1008 |
| 9182 | LOC_Os07g22640 | PQGRLTVTVVKATSLKNKELIGKSD  | T | 272  |
| 9183 | LOC_Os07g22750 | KMFTETIFPRFGTPRMVISDGGSHF  | T | 501  |
| 9184 | LOC_Os07g22750 | LLAKDAPFEFDDTCLKSFEILKKAL  | T | 239  |

|      |                |                            |   |      |
|------|----------------|----------------------------|---|------|
| 9185 | LOC_Os07g23290 | PETRTRGRSVFDLTKKKPKVRKKRTD | T | 416  |
| 9186 | LOC_Os07g25550 | LWKVTSIGRKSDTSLSKGFKEMFD   | T | 238  |
| 9187 | LOC_Os07g26440 | AQDQIAKGYSITLEPSSGVGAPWF   | T | 61   |
| 9188 | LOC_Os07g27520 | STDPEEFLQVYSTVLYAAGVDDNVL  | T | 296  |
| 9189 | LOC_Os07g28800 | WHPDRHNGSTKATAEEKFKHCSAAY  | T | 247  |
| 9190 | LOC_Os07g29520 | VRGARLQGyltGTfEKPkaEVTvTA  | T | 52   |
| 9191 | LOC_Os07g30250 | ERMFLNRNRfKQTLPIHMAIGIMCL  | T | 255  |
| 9192 | LOC_Os07g31840 | SLLLGWSEDEKTFAEALVFVQDSS   | T | 150  |
| 9193 | LOC_Os07g32400 | YITDYYGSYLHQTLWIVMEYMAGG   | T | 84   |
| 9195 | LOC_Os07g32480 | TPRPDGSYMYQPTSPFKRYWNVELW  | T | 286  |
| 9197 | LOC_Os07g35580 | DQTQDVTNRVVGTYGYMAPEYAMRG  | T | 529  |
| 9198 | LOC_Os07g36200 | PRNADKKDYRRDTRSDVYRPTRE    | T | 431  |
| 9199 | LOC_Os07g36420 | RFVRRPRPPAGTTHPDLEFFQPGPH  | T | 277  |
| 9200 | LOC_Os07g37610 | PSGKGPKHKQTCTCNVCMVRRRFR   | T | 841  |
| 9201 | LOC_Os07g37650 | PSVAPPPKVDYATDLFNMLSMDGTT  | T | 227  |
| 9202 | LOC_Os07g37750 | LCMEGFRAGIHLTRVLGMDTMRYAF  | T | 819  |
| 9203 | LOC_Os07g37860 | SPTRDVYCPiHKtKNHDLSSCKaFL  | T | 199  |
| 9204 | LOC_Os07g38120 | EFGVtYLCTeRETgDAYACKSiSKK  | T | 97   |
| 9206 | LOC_Os07g38340 | RIREEDIPKTAFTTRYGLYEFTVMS  | T | 919  |
| 9208 | LOC_Os07g39230 | AAAKRILRYLKHTVKLGLKISKSNS  | T | 1143 |
| 9211 | LOC_Os07g39470 | AARPGGPPTVRITGIDDSVSAYARG  | T | 315  |
| 9212 | LOC_Os07g41180 | LPNHVDDNTHSVTFTSEPETSGNVN  | T | 173  |
| 9214 | LOC_Os07g41230 | LHPQQLLAKDLNTKDLEtNIiVLvH  | T | 122  |
| 9217 | LOC_Os07g42400 | DFNYFGDVLCldtTYKINGYGRPLS  | T | 350  |
| 9218 | LOC_Os07g42400 | LASAMAAWPNTTQRtCAWHVYQNS   | T | 428  |
| 9219 | LOC_Os07g42410 | GVfAYITHTAGStKSfLRKGNEAHP  | T | 1049 |
| 9220 | LOC_Os07g42490 | LVACCLAHKLGVTHCTIAHALEKTK  | T | 435  |
| 9221 | LOC_Os07g42770 | VHRDLKPenfLftSKDENSqLKAID  | T | 136  |
| 9222 | LOC_Os07g42950 | TAGRVRLllHrgTPCfRGYGRDGE   | T | 81   |
| 9223 | LOC_Os07g43316 | EDAMETKHMSKtIPDYLEGKSEVT   | T | 229  |
| 9224 | LOC_Os07g43870 | NTAMVELGDVQLtGHFAEQRFsKQP  | T | 198  |
| 9225 | LOC_Os07g44200 | AIFeIARNiWRPTNKHGRDGDSDDE  | T | 184  |
| 9226 | LOC_Os07g44640 | YDENMEMQqKRdtQViTVVHTKAEE  | T | 353  |
| 9228 | LOC_Os07g45070 | VQDLiQKHLAAVtTPQISLEPSNAN  | T | 1235 |
| 9229 | LOC_Os07g45360 | RQDAVDNLrAGKtWVLiATEViARG  | T | 436  |
| 9231 | LOC_Os07g46540 | LVSKEISSNTItALWDYfCFHING   | T | 658  |
| 9233 | LOC_Os07g47700 | ANLEVRIARiFNTYgPRMCIDdGRV  | T | 298  |
| 9236 | LOC_Os07g49270 | DEVViFRDgTYLTLKEVFESLdLTG  | T | 404  |
| 9237 | LOC_Os08g01100 | KSGARtKRVEATDSAVLKRARDGS   | T | 16   |
| 9239 | LOC_Os08g02340 | DDGiPiTSEKiATLVKAANIKeAY   | T | 29   |
| 9240 | LOC_Os08g02700 | AGVLAGIKVDKGTVELAGtDRETTT  | T | 108  |
| 9241 | LOC_Os08g03360 | NVPPSTSGAKDNTQSAVRlDQENDP  | T | 253  |
| 9242 | LOC_Os08g03360 | RFADTiFKAREKtLDQvAKKDPEKL  | T | 321  |

|      |                |                            |   |      |
|------|----------------|----------------------------|---|------|
| 9243 | LOC_Os08g03520 | GGGGGGCYNCGETGHIARECPSKTY  | T | 185  |
| 9245 | LOC_Os08g05180 | EFRSLTQGSRSVTEYLHEFNRLARY  | T | 167  |
| 9246 | LOC_Os08g05660 | DIAALLPSKTHGTFLKMFLGPVNL   | T | 91   |
| 9247 | LOC_Os08g06140 | SNRATEAGYWKATGKDRVIRSKGDK  | T | 96   |
| 9249 | LOC_Os08g07830 | DDVLSAAQTAAETAERAASAAAAA   | T | 468  |
| 9250 | LOC_Os08g08080 | EEPEDLSPPRRRTRHDSHEPKDKLP  | T | 301  |
| 9251 | LOC_Os08g08240 | SIPIVLDPRFKITFIEFRLKRAFGA  | T | 627  |
| 9252 | LOC_Os08g08390 | KVATQRKHGAPYTRRTDILWKIALF  | T | 345  |
| 9253 | LOC_Os08g08550 | LQEELGTRLNFSTAYHPQTDGQTER  | T | 1519 |
| 9254 | LOC_Os08g08720 | DNGLSILQYADDTIIFMEHDLEEAK  | T | 133  |
| 9255 | LOC_Os08g08720 | IPQVSSEENEMLTKEFSEQEVKHAI  | T | 20   |
| 9256 | LOC_Os08g08820 | SMEFQVPSPLVPTRESYFVRYCKNN  | T | 423  |
| 9257 | LOC_Os08g09160 | REEALERVEGSATSTSTGDGEGRRD  | T | 52   |
| 9258 | LOC_Os08g09910 | SLKKLTMVKCSITMDLSICAPNLEL  | T | 280  |
| 9259 | LOC_Os08g09910 | SRHLLDGMSSRRTTTARWVPRDRPEP | T | 25   |
| 9260 | LOC_Os08g12140 | IENIELAKFRSKTIDRWGEWKLHL   | T | 392  |
| 9261 | LOC_Os08g12680 | VRASDGKGVVYQTRNKKEVALDMIN  | T | 1013 |
| 9262 | LOC_Os08g12760 | HIILENNDNKPVTSNRDTQEVKLEH  | T | 453  |
| 9263 | LOC_Os08g13970 | RSGESSHAVVEETPLEGGQAENVWR  | T | 166  |
| 9264 | LOC_Os08g14050 | FIMVVPTQYPPTFFCSES DLVIQI  | T | 206  |
| 9265 | LOC_Os08g14050 | GSTRRRRSPSATTSAQAQVGMAGE   | T | 121  |
| 9266 | LOC_Os08g14230 | RAVQYREIQGNETDKFLSYFRPCIM  | T | 107  |
| 9267 | LOC_Os08g14340 | RSTMEALTALDTATVEAEWLRELL   | T | 1310 |
| 9271 | LOC_Os08g16610 | DIDEVNNDPMDVTEESSPFVSKNIT  | T | 254  |
| 9272 | LOC_Os08g17120 | AKEAIKLSDYERTLKKASSRKS KPV | T | 511  |
| 9273 | LOC_Os08g19310 | AVETMKSNGIQPTNVTYGLMYWMC   | T | 641  |
| 9277 | LOC_Os08g23020 | SINAVRDGPPETTTLTSTDTERGST  | T | 933  |
| 9278 | LOC_Os08g23440 | CKIQVFCIAEEDTDAEELKADVKKF  | T | 831  |
| 9279 | LOC_Os08g24760 | KLVEFGFTSSAETRSFAADIYAKVP  | T | 58   |
| 9280 | LOC_Os08g24760 | KNGSYRTVKNPQTVFIHPSSGLAQV  | T | 980  |
| 9281 | LOC_Os08g25080 | NKANDGEPSSAETEPSNGKTNINDT  | T | 135  |
| 9283 | LOC_Os08g25670 | PFQ GKLYMLDQATAYGGPEVLQIDP | T | 239  |
| 9284 | LOC_Os08g27710 | TTTTPTAAATKTTSDRPHRRRHQLL  | T | 28   |
| 9285 | LOC_Os08g27870 | LTRNVALIRDLNTNIARVVDLYANL  | T | 138  |
| 9286 | LOC_Os08g28880 | VIPTFDIKLLQPTIFSRFDAQKDAS  | T | 197  |
| 9288 | LOC_Os08g29650 | SDSRSPPPRRRSTSRSPRRRHGRS   | T | 57   |
| 9289 | LOC_Os08g29650 | SKSKSPTPVRRSTSRSPPKKSDSR   | T | 36   |
| 9291 | LOC_Os08g31240 | GVPYKASAFI IPTSTCLVELIETPS | T | 774  |
| 9292 | LOC_Os08g32050 | RNLEPTRITSEVTRSWCPIHKTRKH  | T | 60   |
| 9294 | LOC_Os08g33120 | PSARTIAKSFSRTKDMTWRPDLFSD  | T | 67   |
| 9295 | LOC_Os08g33190 | VGGGDGVCVAPGTSVVVVEVATVSA  | T | 254  |
| 9296 | LOC_Os08g33320 | NKLQVCQAPFDSTIAGNIPDLSEDK  | T | 455  |
| 9297 | LOC_Os08g33370 | EEMVEYMEKVAKTV DVEELTVEERN | T | 32   |

|      |                |                              |   |      |
|------|----------------|------------------------------|---|------|
| 9298 | LOC_Os08g34090 | EIRACKERGIQRTSPTRDVYCPiHK    | T | 186  |
| 9299 | LOC_Os08g34230 | APSTLYSLPPTVTQEYENVFQDEIP    | T | 683  |
| 9300 | LOC_Os08g34230 | ELMRNSKSYNESTDKHLKTLSESLV    | T | 39   |
| 9302 | LOC_Os08g36760 | KKHVTRGSEKNSTNIIEWKKKTVES    | T | 479  |
| 9304 | LOC_Os08g37280 | SNQHEDDSTIDGTLASHAEIRVMVR    | T | 295  |
| 9307 | LOC_Os08g38410 | HEFNGKQVEIKRTIPKDSVQSKDFK    | T | 97   |
| 9308 | LOC_Os08g39050 | YGCPRTAKSLNATMKVLLRARLFDE    | T | 187  |
| 9310 | LOC_Os08g39630 | AAAAAAHFPPDDPTMATQH HHQQMM   | T | 92   |
| 9311 | LOC_Os08g40150 | AAAPPQSVRMAYTSDGTPVFAPVSA    | T | 38   |
| 9312 | LOC_Os08g40230 | SECTELMEAENPTDVDEF SKMENKS   | T | 240  |
| 9313 | LOC_Os08g40830 | SPGRRNDSVRFQTPSRNMTAYSGVQ    | T | 1426 |
| 9314 | LOC_Os08g41260 | SINPAEFHQVYTTGIEAAGDDRVM     | T | 260  |
| 9319 | LOC_Os08g42750 | EPEIRMLLEAADTDGNGTLD CDEFV   | T | 451  |
| 9320 | LOC_Os08g43060 | VSPIRKFEHQEQTNEFKDEKVASGN    | T | 529  |
| 9321 | LOC_Os08g43090 | QQQLIQQQQSSQTQQGQQQPQKS      | T | 451  |
| 9322 | LOC_Os08g43410 | SRGFD CATHVKSTWVPAARRERQN    | T | 128  |
| 9323 | LOC_Os08g43410 | VSSSAVMDPYPTPGPF GGAHFFHG    | T | 287  |
| 9324 | LOC_Os08g43560 | SDKDIVALSGGHTLGRAHPERSGFE    | T | 161  |
| 9325 | LOC_Os08g44150 | LTWVLMGMLAGYTSSRLYKMFKSGS    | T | 289  |
| 9326 | LOC_Os08g44420 | FLDEHTSAMEVVTKDAKRKWEMFAE    | T | 185  |
| 9328 | LOC_Os08g44540 | AKVAPNVKRAAPTDPVERRLLGKVN    | T | 78   |
| 9330 | LOC_Os09g01540 | PSDQPPTGVQSATAETATTQEPTG     | T | 488  |
| 9331 | LOC_Os09g02480 | CYSFAHWILLVITPKWSTCHYLNSR    | T | 78   |
| 9332 | LOC_Os09g03610 | AMQQQLQSPPAQTHPAMQP VQQIPQ   | T | 681  |
| 9335 | LOC_Os09g07300 | LSVAGYEDCQVLT LNSRGEVTDRLA   | T | 1894 |
| 9336 | LOC_Os09g07430 | GTQDSKEFVRRCTSCQRQG GITTRD   | T | 590  |
| 9337 | LOC_Os09g07690 | PVYSLPPVYQDTWNSLPMGEAAQ      | T | 188  |
| 9339 | LOC_Os09g07900 | GALLFTTVGN NATFQPNPNSVYQTE   | T | 3357 |
| 9340 | LOC_Os09g08420 | LVMEFCPGDLHTLRQKQPGKFFPE     | T | 266  |
| 9341 | LOC_Os09g09360 | GGTCRAAVLVFTAWIAL TALTRLL    | T | 17   |
| 9342 | LOC_Os09g10340 | SGFNIPDLFPTWTGILATVTGMKRS    | T | 224  |
| 9343 | LOC_Os09g10710 | SRWPEDNSFYEATITDYNPETDLYA    | T | 214  |
| 9346 | LOC_Os09g11250 | STTIFQRFGFSSTSPELS DKEENQR   | T | 76   |
| 9347 | LOC_Os09g12130 | RVQPEGGDERLGTSAPAPPRQ RIVT   | T | 749  |
| 9349 | LOC_Os09g13120 | PETPLAWQGRTRTTLRLTPFLLHSLR   | T | 126  |
| 9350 | LOC_Os09g13630 | DNNCSGNHVEGSTLQKLEGKCFWGK    | T | 172  |
| 9354 | LOC_Os09g14960 | RIKQEEAREKKETTLYKKYTELLLA    | T | 485  |
| 9355 | LOC_Os09g14990 | PAKDAECFFCKETGHWKRNCCKYLE    | T | 176  |
| 9356 | LOC_Os09g15770 | AAGSDEDHSNSPTRSHDGNVA ADE    | T | 219  |
| 9357 | LOC_Os09g16330 | LYGLVTSQFGDVTDTFDNGVRISDF    | T | 369  |
| 9360 | LOC_Os09g16458 | HNVSGI I KPHRMTLLLGP PGSGKTS | T | 164  |
| 9361 | LOC_Os09g16980 | VLVIELLTRKRPTYRTDQGD SLVLH   | T | 526  |
| 9363 | LOC_Os09g17730 | RSELAQVQELYKTQVDKFVAEWCNS    | T | 344  |

|      |                |                            |   |      |
|------|----------------|----------------------------|---|------|
| 9364 | LOC_Os09g17850 | YWTQDGGDADDQTVEQQPEDLKTQE  | T | 419  |
| 9366 | LOC_Os09g19640 | FRGAANSLSQLYTLAMGGQKLSFQA  | T | 37   |
| 9367 | LOC_Os09g19750 | EVTSPFPSPNSITASLIYRSPQFV   | T | 82   |
| 9368 | LOC_Os09g19910 | VSMNKIETHKNETHGTSDINENTP   | T | 86   |
| 9369 | LOC_Os09g19952 | PIKKNHVSNNCTKYSKEIEIIFRS   | T | 95   |
| 9370 | LOC_Os09g20060 | IQWPKDLIEIRVTARPTTAPGGRPL  | T | 79   |
| 9371 | LOC_Os09g20060 | NDRQGMVNYIYDTLWSHRDKEYIMY  | T | 292  |
| 9372 | LOC_Os09g20590 | DMEPGPSAAHTSTTTTTSKEDDSDF  | T | 299  |
| 9374 | LOC_Os09g21110 | VFANEINIAVIETEKSYNAFMFRDA  | T | 809  |
| 9375 | LOC_Os09g22150 | PETRTGAQVFELTKNIKVVFRKGKK  | T | 231  |
| 9376 | LOC_Os09g23730 | EGLLPAAHPSLLTAHLARMKQTGEL  | T | 68   |
| 9377 | LOC_Os09g23790 | LTPSDPEANPVLTRPGKEQGEEAPE  | T | 1225 |
| 9378 | LOC_Os09g24250 | PLFNILKKFDGETVTEVVRPSIARM  | T | 423  |
| 9380 | LOC_Os09g24440 | GYTEIKVQAENDTFALHADNMTIRN  | T | 58   |
| 9381 | LOC_Os09g25370 | GLGLSGMLASLATTGFQASNLGDAV  | T | 64   |
| 9382 | LOC_Os09g26540 | PVIAVARNFKSKTLLVRCGEMTRER  | T | 190  |
| 9384 | LOC_Os09g26560 | LYYNICLVTVHCTSNLPKKSFNDDT  | T | 229  |
| 9385 | LOC_Os09g26800 | WDQYGIAYGRPSTNIIHNVTIRSM   | T | 338  |
| 9387 | LOC_Os09g26970 | NIGAEDWVDEANTQQLSQQQPSSPQ  | T | 1310 |
| 9388 | LOC_Os09g27020 | SPETPLAWQGTRTTLRLAPFLHSL   | T | 115  |
| 9391 | LOC_Os09g29500 | RPGGSLRRARVTSLVAVVRTTVT    | T | 440  |
| 9393 | LOC_Os09g29630 | QTKRMCTANLIVTNHEAQNFPGCNL  | T | 254  |
| 9394 | LOC_Os09g29750 | LRMASAGAPQFGTMNRHNHVPVPEP  | T | 994  |
| 9396 | LOC_Os09g30070 | NENGNSPGQLQNTLDVVKTTAALPS  | T | 879  |
| 9398 | LOC_Os09g30412 | AEINQLLSLIINTFYNSKEIFLREL  | T | 24   |
| 9399 | LOC_Os09g30439 | APTIPGTAVPVATQRRHQGDAAA    | T | 798  |
| 9400 | LOC_Os09g31470 | MQSVRMAYTADGTPIFAPVNSAPAP  | T | 53   |
| 9401 | LOC_Os09g31486 | EGLIAVFDLGGGTFDVSILEISNGV  | T | 250  |
| 9402 | LOC_Os09g32090 | WERQIRIRGEGGTFADVYYTSPTG   | T | 164  |
| 9403 | LOC_Os09g32430 | HDEVSRSKDGTDATEDATIDTRSSE  | T | 151  |
| 9404 | LOC_Os09g32540 | LAEASVETKEKKTAKERVLSFRRR   | T | 898  |
| 9405 | LOC_Os09g32540 | VSKDQLSGQPNTNLSGESIVGKEV   | T | 273  |
| 9406 | LOC_Os09g32650 | KPLIKNKLLEEGTAVLYSEPEKKVM  | T | 511  |
| 9407 | LOC_Os09g33450 | RVPVDQGLQQTRTPARGFMSPNMGK  | T | 324  |
| 9408 | LOC_Os09g33600 | GADSQATDRDGRTALQYAIIDSGTID | T | 811  |
| 9409 | LOC_Os09g33870 | VDSSHYRRYCSPTQDDSTVSTHRR   | T | 245  |
| 9410 | LOC_Os09g33940 | NSKEQEYNIKGSTQKKIKRDIKVLG  | T | 320  |
| 9412 | LOC_Os09g33980 | EKYHFLEAMSTITPAAHRGSIVHSR  | T | 625  |
| 9413 | LOC_Os09g34060 | EQQVHLQDALNDTLKSEVQRLKVAT  | T | 264  |
| 9414 | LOC_Os09g34110 | LEKKPENRGTMATIPRRKPPVDEKV  | T | 328  |
| 9415 | LOC_Os09g35710 | IDSSLQPNPSIPTAPPLVHVTDYDN  | T | 193  |
| 9416 | LOC_Os09g35710 | PSGNTESAQPVYTVDSPPSSSQPQG  | T | 315  |
| 9417 | LOC_Os09g36270 | MIPLARELLRNGTEVVLVANSLPAL  | T | 757  |

|      |                |                            |   |      |
|------|----------------|----------------------------|---|------|
| 9419 | LOC_Os09g36360 | DAKLNPAAPAPTPTPPPGILESL    | T | 133  |
| 9420 | LOC_Os09g37006 | IVGLHQNTTGTSTIDTDMWEPLEEG  | T | 83   |
| 9421 | LOC_Os09g37170 | DDGEPNPRRRPRTPPPLPRQSHRRE  | T | 29   |
| 9423 | LOC_Os09g37860 | FREHRFHTSLDKTRRFYPHVNMDG   | T | 525  |
| 9425 | LOC_Os09g38390 | VSMKLYTEAIEDTITTEEAQEVFQL  | T | 391  |
| 9426 | LOC_Os09g38580 | PSIKNSDYNIRNTTFALVIMIYIF   | T | 209  |
| 9428 | LOC_Os09g38970 | WLNNCVGRKNYFTFISLMAISLFWL  | T | 223  |
| 9433 | LOC_Os09g39490 | EFRNKNAARRSETTQKKAERKID    | T | 135  |
| 9434 | LOC_Os09g40040 | NNSHFTLPHPVPTWPGREQGGEAPE  | T | 1033 |
| 9436 | LOC_Os10g01320 | VYYVSEALHDAKTRYPQIQKLLYAV  | T | 317  |
| 9437 | LOC_Os10g01570 | LPTMVLPHYPLPTHNVVRGGAPNA   | T | 84   |
| 9438 | LOC_Os10g02509 | PGHTLQMMQQQTEPQLQPPPPQQ    | T | 154  |
| 9439 | LOC_Os10g02584 | INGIDLDSRIPTPICSTGAPQQC    | T | 250  |
| 9440 | LOC_Os10g02630 | RIGGENAEQKLSTRDQQHAGRPRSE  | T | 248  |
| 9441 | LOC_Os10g03130 | HEGICGSHASGRTMVGKAFRQVFFW  | T | 380  |
| 9442 | LOC_Os10g03830 | ATVDGVKVDGLDTNLAVMKELLSPV  | T | 497  |
| 9444 | LOC_Os10g07180 | AAQNSGKHIHMITRAQRVVMKRLGI  | T | 493  |
| 9445 | LOC_Os10g07180 | SRSLGKALLQTMTSYLLTAAPITPS  | T | 202  |
| 9446 | LOC_Os10g07270 | SSSIGDEPELQRTLREGDDYALVPQ  | T | 104  |
| 9447 | LOC_Os10g07300 | ISEVLSESKTRYTQIQKLRAIFIT   | T | 145  |
| 9449 | LOC_Os10g07510 | QSELNYLQGHLSMELSPPPYVAG    | T | 136  |
| 9450 | LOC_Os10g08022 | GVILFDETLYQKTKDGKPFVDVLKE  | T | 83   |
| 9451 | LOC_Os10g12174 | CYSMTINKSQGQTLQRVGYYLKKPV  | T | 1240 |
| 9452 | LOC_Os10g12410 | RAHPEGSMIEEYTTEEVECCIDYM   | T | 581  |
| 9453 | LOC_Os10g12808 | EELKEKGYIRPSTSPWGAPVIFVEK  | T | 936  |
| 9455 | LOC_Os10g14120 | VQRGGLRKGTGHTLIHKKDFSVKQQ  | T | 686  |
| 9456 | LOC_Os10g14290 | DLESGEDSSDSVTS DAGSAKAAPDD | T | 50   |
| 9457 | LOC_Os10g16480 | AQFQGVVDCARRTVTLYRGPEQPVV  | T | 805  |
| 9459 | LOC_Os10g17980 | TKALGNKEHRGRTQGVGSSVPWKYG  | T | 351  |
| 9461 | LOC_Os10g20180 | VYYVSEALHDAKTRYPQIQKLLYTV  | T | 235  |
| 9463 | LOC_Os10g20480 | YTIHPNPDEILTLGAARGTFIQWP   | T | 427  |
| 9465 | LOC_Os10g20600 | NHFVTMPKADTRTPPAFASDPLKRV  | T | 152  |
| 9466 | LOC_Os10g21310 | GELNGVSYSDPATVKKYARHSQLGE  | T | 416  |
| 9467 | LOC_Os10g21310 | VYWDLEIFCDERTGKPSLDLPKIFG  | T | 128  |
| 9468 | LOC_Os10g21840 | RFNECRNTIPEITDSSVIRTFKSGV  | T | 349  |
| 9469 | LOC_Os10g22070 | KLLGSTNPSPFVTRVELALALRGLT  | T | 29   |
| 9470 | LOC_Os10g24120 | VEDRVDTPGYTPTSPGHNETGVES   | T | 437  |
| 9471 | LOC_Os10g25110 | SSGKMFVRDSAGTPFVRNSGKQKRS  | T | 797  |
| 9474 | LOC_Os10g26600 | KGSKVKYELDKKTGMIVDRVLYSS   | T | 61   |
| 9475 | LOC_Os10g26670 | RSNFTLLAPVKVTIPASGGDDDDDD  | T | 266  |
| 9476 | LOC_Os10g28200 | APTMKLKDGLRFTYFWIKEQIEKEK  | T | 333  |
| 9478 | LOC_Os10g30350 | LGPWTTLAEFMATDDFRYLTKSCPG  | T | 307  |
| 9479 | LOC_Os10g30580 | ANFISVKPELLTMWFGESSEANVRE  | T | 555  |

|      |                |                             |   |      |
|------|----------------|-----------------------------|---|------|
| 9482 | LOC_Os10g32920 | LPVAATVNCADNTGAKNLYIISVKG   | T | 32   |
| 9483 | LOC_Os10g32960 | KTMQVRLLNCMYTSLDYAQTGLIAA   | T | 279  |
| 9484 | LOC_Os10g33680 | EALYSQWLALPETSCLVNSLIEDAK   | T | 48   |
| 9486 | LOC_Os10g34380 | RESKDITSTSRWTKVKENFRSDARY   | T | 845  |
| 9487 | LOC_Os10g34400 | LERRDRFSFSFYTEQYSKRQDVEKV   | T | 502  |
| 9488 | LOC_Os10g34580 | KPMEEDVKVIEKTATMRGFKVEGED   | T | 420  |
| 9489 | LOC_Os10g34820 | PNRHLLISSCQGSTPKQGTLHSPLM   | T | 360  |
| 9490 | LOC_Os10g35220 | RGGDIVKALRDTTKAKIRVADSIPG   | T | 75   |
| 9491 | LOC_Os10g35280 | SKNLLTEKKKTKTPKEKSKKRAHNH   | T | 652  |
| 9492 | LOC_Os10g35580 | ESSKGGKETNRRTSVPSQAPAKSSS   | T | 145  |
| 9494 | LOC_Os10g35870 | TAAAEPEKAPATEEKPREVSSEEV    | T | 201  |
| 9495 | LOC_Os10g37230 | ACVKHEYAPAEATKMDGAIQTVYPR   | T | 130  |
| 9498 | LOC_Os10g37480 | RNVVEIKGRFSVTSENVDLAKVQEV   | T | 565  |
| 9499 | LOC_Os10g37630 | EKYSLSVSNFPRVTYGPEKLSQTL EE | T | 439  |
| 9502 | LOC_Os10g38850 | AVDSRFTRAWVDTDTIFIDGVDPL    | T | 1679 |
| 9503 | LOC_Os10g39140 | AAEAEQQHQLLSTAVHDTMPGKYVR   | T | 14   |
| 9504 | LOC_Os10g39440 | TLVPLYISETAPTDIRGLLNTLPQF   | T | 127  |
| 9505 | LOC_Os10g39620 | TVLYLTIWVDVHTYEIIGSYRIEYG   | T | 620  |
| 9506 | LOC_Os10g40540 | TFRIVTDRTVFATPEVHIGFHPDAA   | T | 177  |
| 9510 | LOC_Os10g41440 | LYGRDPALSTLRSGIHGGPGGPL     | T | 315  |
| 9511 | LOC_Os10g41790 | AHTNAQMNKLLL TMAEWYRYADNRK  | T | 539  |
| 9512 | LOC_Os10g42110 | AMQAQVCMPEWPTAFYLLALALSKL   | T | 474  |
| 9513 | LOC_Os10g42196 | LSASHGLSPKRPTHEFGNAQNLAH    | T | 290  |
| 9514 | LOC_Os10g42196 | PLSLSLGLPGVVTSNQALEMKQFLP   | T | 1525 |
| 9515 | LOC_Os10g42210 | DGRQRRGARGDGTVARRRDGDGDGA   | T | 132  |
| 9516 | LOC_Os10g42439 | DRAAPEGNATEFTLTLRTDARGKFK   | T | 101  |
| 9517 | LOC_Os10g42724 | AEPEAEPAIMPVTVEPENSPTKDG    | T | 331  |
| 9518 | LOC_Os11g01300 | SGGGGSNMLRFYTDEAPGLRLSPTM   | T | 63   |
| 9520 | LOC_Os11g01920 | LPSELTLRSPRATMYCEADQDQLRR   | T | 1891 |
| 9522 | LOC_Os11g02190 | LDLDSGFISSDITKETHTKPSPIES   | T | 604  |
| 9523 | LOC_Os11g02720 | PSRRCAVVRAHTNPWRHRVSRCSG    | T | 14   |
| 9524 | LOC_Os11g04070 | QVLNIPTKINKGTVEIITPVELIKK   | T | 154  |
| 9526 | LOC_Os11g06750 | KKYASVVRVIVHTQIRKMKGLKQKK   | T | 166  |
| 9529 | LOC_Os11g07440 | ILLRAYTKYTADTSLAESPECQNCM   | T | 221  |
| 9530 | LOC_Os11g08390 | LLDLPLPPASGWTMELVSQLINVWS   | T | 382  |
| 9531 | LOC_Os11g08460 | KMRETAEVYL GKTVTNAVITVPVYF  | T | 153  |
| 9532 | LOC_Os11g08460 | RETAEVYL GKTVTNAVITVPVYFNN  | T | 155  |
| 9533 | LOC_Os11g08470 | AEDMGTSKNNNTITNHSGRLLKED    | T | 523  |
| 9536 | LOC_Os11g09329 | SKVQILTLVLETLSKNCGDVVYQQ    | T | 66   |
| 9537 | LOC_Os11g09420 | PFTWT EEAENALTQLKAYLSSPPVM  | T | 856  |
| 9538 | LOC_Os11g10060 | IHGRLVCWLDAATSKLEAEQQQQH    | T | 675  |
| 9539 | LOC_Os11g10060 | VVQKYQSAVQNSTNLSTQDMQNNCN   | T | 495  |
| 9540 | LOC_Os11g10490 | AEKGKRPAD EAGTSSGSASKKSRSD  | T | 299  |

|      |                |                            |   |     |
|------|----------------|----------------------------|---|-----|
| 9542 | LOC_Os11g10510 | PAKFEQAKKFGCTDFVNPDKHSPV   | T | 241 |
| 9543 | LOC_Os11g10710 | HVWNITLDVHPTEPYLLSIGSQDQ   | T | 455 |
| 9544 | LOC_Os11g11710 | AWFVARDGAKDCTAAVDECKDKVDQ  | T | 101 |
| 9545 | LOC_Os11g11710 | EDEKLLAIHASLTQLLRGPTGTRRP  | T | 155 |
| 9546 | LOC_Os11g12810 | TDVPHIYRLAAKTGVFINPALVEP   | T | 631 |
| 9549 | LOC_Os11g15750 | RGKRSRNLMPKETYYIAALNDDGKP  | T | 619 |
| 9550 | LOC_Os11g16370 | NMNGSVSGEDQPTTSGVENGHQEPF  | T | 42  |
| 9551 | LOC_Os11g16400 | PADQDKQHPKRETKTKITSNSKTKA  | T | 188 |
| 9552 | LOC_Os11g16400 | QQTVDLFLALEATLARSAAAGHAED  | T | 324 |
| 9554 | LOC_Os11g16730 | SRDEWDKFVAKMTTPEALERRKKMS  | T | 181 |
| 9555 | LOC_Os11g16750 | LKSRTDLVNLDTNELHPKELPNGK   | T | 598 |
| 9556 | LOC_Os11g17890 | DTSSVTCETISVTPMPKTGIVSNFL  | T | 549 |
| 9560 | LOC_Os11g20290 | LPVTFGGSANFRTERVNFVDADLSL  | T | 574 |
| 9562 | LOC_Os11g22180 | TVGRRIGQALPLTDVIGPLVDHQAA  | T | 51  |
| 9563 | LOC_Os11g23750 | RRTPASCGSTGFTKVRKDTYTCKI   | T | 609 |
| 9565 | LOC_Os11g28270 | FGPNCKFDHPMGTVMYGLATSPTGD  | T | 384 |
| 9567 | LOC_Os11g29000 | GQGHYKMDNLVHTFAKNVVESESLV  | T | 156 |
| 9569 | LOC_Os11g30970 | AWVEGQAFAPGKTVVPKPDNRTVV   | T | 194 |
| 9572 | LOC_Os11g33120 | LLRAEYDRDGAMTNPSFPKVLIDGP  | T | 725 |
| 9573 | LOC_Os11g33330 | FGDKGYLAFEHITWAPYQTKLIDTT  | T | 642 |
| 9574 | LOC_Os11g33340 | HQGFPLKAHSSPTTRMIISMSSRWL  | T | 689 |
| 9575 | LOC_Os11g34200 | ETIHGTESVPPSTHPPAEAPSAAEI  | T | 194 |
| 9576 | LOC_Os11g34200 | FADQGEALPGEETVPETIHGTESVP  | T | 179 |
| 9577 | LOC_Os11g34450 | KEEGRGNDAAHAATIRSYRGKIEAEL | T | 91  |
| 9578 | LOC_Os11g34600 | MVLRPSQPIIGVTPGHTWPLGHINL  | T | 663 |
| 9579 | LOC_Os11g35080 | KKEAAAARGAGKKTKKPAAAAAAAT  | T | 94  |
| 9580 | LOC_Os11g35450 | IAGLIPRMPRNLTTDLSNSLSGP    | T | 565 |
| 9581 | LOC_Os11g35590 | PEHLQQIAISIELLDVNELSLEEV   | T | 275 |
| 9582 | LOC_Os11g35590 | SSRDANGRLLFTEEWLAKFRKAA    | T | 318 |
| 9583 | LOC_Os11g36060 | QPHKVDLSSPDRTIIVQIAKTICMI  | T | 339 |
| 9585 | LOC_Os11g36340 | HGVEDATGPDRATTLVASNEVPVQG  | T | 418 |
| 9586 | LOC_Os11g36340 | TKIPSQASATAKTETKPLVTKQKTS  | T | 358 |
| 9587 | LOC_Os11g36390 | KYFASKTEKEEDTSAGKGTGRGLPK  | T | 73  |
| 9588 | LOC_Os11g36880 | SDFAGWWLAARQTVAKIDRKTFDAG  | T | 948 |
| 9589 | LOC_Os11g37090 | ICEITRVPGELITVACNMHGTRTVQ  | T | 501 |
| 9590 | LOC_Os11g37100 | NKAAPGLPSGEFTISLYEVLARVHG  | T | 64  |
| 9591 | LOC_Os11g37660 | AAKGFASDLLVATALIGMYAEAGDM  | T | 158 |
| 9592 | LOC_Os11g37890 | TDRFEMWGDGLQTRSFTFIDECVEG  | T | 236 |
| 9593 | LOC_Os11g37950 | NKPLSWRQKYGWTAFCGPVGRGQA   | T | 73  |
| 9594 | LOC_Os11g37990 | IAKIALKRGVQLTTSERMAEDIKKL  | T | 435 |
| 9597 | LOC_Os11g38620 | IVRTANLYWNSMTQEQRGEFLSVRF  | T | 353 |
| 9598 | LOC_Os11g40090 | KHSHKKKREAIATMAAASPKKKEKK  | T | 57  |
| 9600 | LOC_Os11g40140 | GCAMSGLIADARTLVEHARVETQNH  | T | 87  |

|      |                |                            |   |     |
|------|----------------|----------------------------|---|-----|
| 9602 | LOC_Os11g41890 | RTKKIFVGGLASTVTEADFRKYFEQ  | T | 116 |
| 9604 | LOC_Os11g43590 | VKGDIPVARSGHTVIRAGPVLILFG  | T | 211 |
| 9605 | LOC_Os11g43610 | QWGGRELEQQIRTSITLRKLLSPN   | T | 247 |
| 9606 | LOC_Os11g46200 | AGGDGGPFDELKTRVEDVSKRFSDS  | T | 109 |
| 9607 | LOC_Os11g46240 | QVSQSQQERPGQTVYPQASHLGHQQ  | T | 101 |
| 9609 | LOC_Os11g47240 | ELTFLGLGYNQLTGPVPSTFGNIRP  | T | 368 |
| 9610 | LOC_Os11g47330 | VAGGGASVIYADTVGDLGYASELGN  | T | 288 |
| 9612 | LOC_Os11g47760 | AEDKTTGQKNKITITNDKGRLSKEE  | T | 508 |
| 9613 | LOC_Os11g47760 | AGGVTMLIPRNTTIPTKKEQVFST   | T | 424 |
| 9614 | LOC_Os11g48030 | TREGEVRFPEISTPILEKICQYFYW  | T | 80  |
| 9615 | LOC_Os12g01260 | VLVMSLCFIGFVTALHVFGLYRSR   | T | 88  |
| 9616 | LOC_Os12g01922 | NKSYTQYIPLPITDLSWLKTPSIY   | T | 230 |
| 9617 | LOC_Os12g01940 | VTEVDDDTTMEGTSSAPYPLLQVDN  | T | 249 |
| 9618 | LOC_Os12g03880 | NGYKNVLAVAVETEYSYPHADKIKE  | T | 258 |
| 9620 | LOC_Os12g04000 | GRAAAMPASVMTRLILIMVWRKLI   | T | 230 |
| 9621 | LOC_Os12g04050 | GSVNPAEFLQVYTTGIEAAGGDDRV  | T | 146 |
| 9622 | LOC_Os12g05000 | TTTMRDGKLWKTITIKRRPGTGAPS  | T | 217 |
| 9624 | LOC_Os12g05110 | FAGLAKAVKPGDTIFVGQYLTGSE   | T | 147 |
| 9625 | LOC_Os12g05110 | KPAVVTRVDSMTDNLRPTRAETD    | T | 320 |
| 9626 | LOC_Os12g05420 | GPKGTKWIFVMSTTKKLYAGKKERG  | T | 225 |
| 9628 | LOC_Os12g05930 | RLYGQIPHKLMMTSLQFLDLSSNGD  | T | 76  |
| 9629 | LOC_Os12g06380 | DSEALVGYFKRRTIEQGMFYWDVLV  | T | 257 |
| 9632 | LOC_Os12g06780 | GLLKEIHVLEKSTQKLDAIDAAPI   | T | 313 |
| 9633 | LOC_Os12g06890 | GASSTPAFGATTTTAFGTTTAFGS   | T | 195 |
| 9635 | LOC_Os12g06980 | VSAMLDKESNGLTTEMPEAHIRRS   | T | 576 |
| 9636 | LOC_Os12g07230 | FTFFDKDGSFGFITIDELSQACEQFG | T | 443 |
| 9637 | LOC_Os12g07260 | EKAEEIFDNMFKTWKTLSSKYYNAM  | T | 443 |
| 9638 | LOC_Os12g07300 | FCMGLQDKDIGATKEELGIEREQVL  | T | 514 |
| 9639 | LOC_Os12g07590 | SYHLDENVKTLRTQVRGMVQTEKQY  | T | 297 |
| 9644 | LOC_Os12g10410 | ENPPDHVIFPRLTYLDLSDLPESD   | T | 857 |
| 9646 | LOC_Os12g11600 | LLIKVASGMAIPTDISGTYHCRPIP  | T | 394 |
| 9647 | LOC_Os12g11750 | EVEEERETALIATAVFNEARDDLRL  | T | 543 |
| 9648 | LOC_Os12g13150 | KVRISPSQKHIAATLDLNGSVNIFVL | T | 303 |
| 9649 | LOC_Os12g13340 | KTNAVAPSIGSGTTVGKVEFNEFIN  | T | 66  |
| 9651 | LOC_Os12g14984 | WSRFTNLVLSGPTLSIPDYVLLQHF  | T | 464 |
| 9653 | LOC_Os12g16060 | DKLGFPLSQELATDLILQSLPPSFE  | T | 212 |
| 9654 | LOC_Os12g16430 | YAYGIDTNWYVDTGATDHITGQLDK  | T | 326 |
| 9655 | LOC_Os12g18120 | DARAPPKSDPGATPIGSISPSSAAP  | T | 17  |
| 9656 | LOC_Os12g18630 | LPGWLSRGLVGRTLADPSFPHKIAF  | T | 156 |
| 9659 | LOC_Os12g19040 | KKKLKVANTGKHTGCSNEDKAHQDQ  | T | 70  |
| 9660 | LOC_Os12g19290 | MLSSKDTNFLNFTYKNLELSDDPEH  | T | 486 |
| 9662 | LOC_Os12g21798 | KNVLTNFWGMSFTTDKLRSLVKKWQ  | T | 106 |
| 9663 | LOC_Os12g21890 | AAGREAQSSIFSTSGLSSWAKNLKI  | T | 81  |

|      |                |                            |   |      |
|------|----------------|----------------------------|---|------|
| 9664 | LOC_Os12g21940 | ELHEGIIVWHIATDIFIAQRKADDQ  | T | 546  |
| 9665 | LOC_Os12g22000 | NEEVAEAADDIPTIDPDVEEFLANE  | T | 482  |
| 9666 | LOC_Os12g22530 | HQNVVLDICQETTFFLHDASLEKEN  | T | 63   |
| 9667 | LOC_Os12g23520 | FFFFRADCTISKTRMKFSWIHMFFM  | T | 677  |
| 9669 | LOC_Os12g25690 | DKAQISIDYDPQVTEQIQRDLAMSK  | T | 368  |
| 9670 | LOC_Os12g25710 | GGGGKKKEVKKETKLGMAKKDDNF   | T | 25   |
| 9672 | LOC_Os12g26240 | ASAPATPRQRMITGDEVPVKEVALG  | T | 780  |
| 9673 | LOC_Os12g26240 | ATCQARWSEIALTQDTHPPPCVAR   | T | 595  |
| 9676 | LOC_Os12g28260 | QYIPRLVRFYPITSELKRTGVFAE   | T | 263  |
| 9678 | LOC_Os12g29660 | AHKDEIYSRPKRTWFATEKEKKLLA  | T | 626  |
| 9679 | LOC_Os12g31050 | TTSLQQIVQKENTREFVPRQQHDEL  | T | 352  |
| 9680 | LOC_Os12g31350 | QKNLLYLAAIADTQPQTISRPMQV   | T | 69   |
| 9681 | LOC_Os12g32374 | FINKHMLYHYQDTGHCLALSFSCLS  | T | 119  |
| 9682 | LOC_Os12g32410 | RAFKSGVRDRYTTQELATRRITTR   | T | 435  |
| 9683 | LOC_Os12g32440 | PVSPHVIKIIGYTESLKLGFPLSR   | T | 223  |
| 9685 | LOC_Os12g36180 | EIWLTVSEIPLFTQPTSAPPPSRTP  | T | 378  |
| 9686 | LOC_Os12g36510 | IVHQALKKYQDYTGQLSPAKCSLL   | T | 152  |
| 9687 | LOC_Os12g37060 | ALGFDLSNLLVFTPMTIEMMKRHK   | T | 138  |
| 9688 | LOC_Os12g37430 | KSTSIEDNDFVTSRSKRDKGNKRSR  | T | 324  |
| 9689 | LOC_Os12g37560 | DMSAPFSHYIYTGHNSYLTGNQLN   | T | 125  |
| 9690 | LOC_Os12g37560 | GVRADCVMMKTRTIEDQWVPMWDEE  | T | 510  |
| 9692 | LOC_Os12g37720 | VCHSKAWDSKIVTSAWVVPYQVSK   | T | 658  |
| 9695 | LOC_Os12g37870 | APLIATLPLEVTRKIGDFIRGVYSV  | T | 176  |
| 9696 | LOC_Os12g37890 | QFLAVNHINCLATLEGFQSCANLLV  | T | 1298 |
| 9697 | LOC_Os12g38440 | NVQSPRCLESMRTPDVKKRSVQKQK  | T | 163  |
| 9698 | LOC_Os12g39090 | SPLGKSPLGHQGTGEFVSAGSKAPL  | T | 149  |
| 9702 | LOC_Os12g41180 | YNRTYRSELPSKTTPNKIARPARA   | T | 405  |
| 9703 | LOC_Os12g41290 | DSSGTSPGDTLSTTYFPRLDGTDYK  | T | 614  |
| 9705 | LOC_Os12g42550 | VVSVEPAPEGWTKKFTPQRGGRFE   | T | 40   |
| 9708 | LOC_Os12g44150 | RASRTENQDAIDTAIVGMLADPKEA  | T | 380  |
| 9710 | LOC_Os12g44360 | SRHLLRGTRVPYTVALLVLGVALGS  | T | 37   |
| 9713 | LOC_Osm1g00580 | IIERKSVHEPMQTGLKAVDLSLVPIG | T | 150  |
| 9714 | LOC_Osm1g00590 | PEKRVVSEPIEMTQEFYFDFAFPW   | T | 172  |
| 9716 | LOC_Osp1g00600 | SSPRGWFTFGHATFALLFFFGHIWH  | T | 457  |
| 9717 | LOC_Osp1g01070 | FGILLFMVLISATRDFRERTKSKLV  | T | 34   |
| 9719 | LOC_Os01g01689 | LQKTGCSHVLDVYCQGLSNQKSLQ   | Y | 1849 |
| 9720 | LOC_Os01g01800 | NKSNLDIVTQTPYPHIQSPMSSPVQ  | Y | 392  |
| 9721 | LOC_Os01g02700 | KCSQEMNSSNVMYRPVACRSGNSSF  | Y | 158  |
| 9722 | LOC_Os01g04650 | AAAAAAQPPAGYVYAQMHAAPPQ    | Y | 444  |
| 9723 | LOC_Os01g06290 | RGRSYSRSRSRSYSRSQSPRRDSRN  | Y | 183  |
| 9724 | LOC_Os01g08380 | PRGGAGFYGNCYYIMRVSAPAGKVA  | Y | 310  |
| 9725 | LOC_Os01g08380 | SDWTRLGFAEVDYGWGPPAHVVPLT  | Y | 382  |
| 9726 | LOC_Os01g08420 | DITLPGLAELRGYWRGSLDASGGGN  | Y | 278  |

|      |                |                             |   |      |
|------|----------------|-----------------------------|---|------|
| 9727 | LOC_Os01g08760 | CHNDLQYGNIMIYEETRQVTLIDYE   | Y | 217  |
| 9728 | LOC_Os01g08960 | LLQTCLDELATRYPATKFVKIISTD   | Y | 147  |
| 9729 | LOC_Os01g09620 | EEAAAMAAAVDAYACDEFMYEFKV    | Y | 72   |
| 9730 | LOC_Os01g10820 | YDPSTGIYGMDFYVVLERAGYRVAR   | Y | 130  |
| 9731 | LOC_Os01g10840 | PTREEIRCMNPNYTEFKFPQIKAHP   | Y | 297  |
| 9732 | LOC_Os01g11140 | EKVASTAATNNSYSIDTNWYIDSAA   | Y | 260  |
| 9733 | LOC_Os01g11960 | CIPGALCVMFFGYSNSGLRDYGVVK   | Y | 208  |
| 9734 | LOC_Os01g12390 | AYYYSKDEKLLVYDFYSRGSVSNML   | Y | 411  |
| 9735 | LOC_Os01g12650 | ATAIWILFELLGYHLLTFVCHGLIF   | Y | 125  |
| 9736 | LOC_Os01g12660 | SICLSDTMVLGRYIEEIVSAVSYH    | Y | 388  |
| 9737 | LOC_Os01g12770 | DVVVDLSDLLIAYSNTVLTRIAFGD   | Y | 197  |
| 9738 | LOC_Os01g16020 | ERIRLPDEAMAYYDDLAEYVGGDV    | Y | 224  |
| 9739 | LOC_Os01g16030 | KLGLHSLRQRHWYIQSTCATTGEG    | Y | 154  |
| 9740 | LOC_Os01g16110 | INEGLYYYENHAYNQRSSQAGTIDI   | Y | 615  |
| 9741 | LOC_Os01g16330 | IFGVNFSDKSFIYLAGLQLLSSGK    | Y | 158  |
| 9742 | LOC_Os01g16850 | GSDTVEEVTVFYYRKNWKIDLKGS    | Y | 1759 |
| 9743 | LOC_Os01g16850 | LDDRSTPGVFIGYAEGSKAYRILDP   | Y | 1004 |
| 9744 | LOC_Os01g17320 | HKLSYKNKIKPLYTTYLMLLDSYSK   | Y | 520  |
| 9745 | LOC_Os01g19490 | EWMVNTKGMNMSYTNHAIRLDLIYK   | Y | 124  |
| 9746 | LOC_Os01g19894 | STDPPQGEVGM DYWHAAPQVTQPTQ  | Y | 1896 |
| 9748 | LOC_Os01g20950 | EVYEQLRQLVSTYPTVPSGLDTPYY   | Y | 32   |
| 9749 | LOC_Os01g20950 | YPTVPSGLDTPYYRHPDGWYTF LPA  | Y | 44   |
| 9750 | LOC_Os01g21450 | TSLYIKKHEILSYFFDKQNKGAETD   | Y | 281  |
| 9751 | LOC_Os01g21960 | RFSKDNILGEGGYGVVYRGQLINGT   | Y | 204  |
| 9752 | LOC_Os01g23530 | NDKDLNLVSLRFYLLRKNGYNMSSG   | Y | 122  |
| 9753 | LOC_Os01g23590 | YIRKEGLKQLIIYANESFWDQLMKF   | Y | 636  |
| 9754 | LOC_Os01g23640 | PTPGLAVSETGRYQNLHVPVKLMEC   | Y | 340  |
| 9755 | LOC_Os01g25610 | LPLILII RNRLKYALTYREVISILM  | Y | 54   |
| 9756 | LOC_Os01g25610 | VRSVQFGQKGIPYLN TYDGRTIRYP  | Y | 138  |
| 9757 | LOC_Os01g26970 | AMAVSASEGVGQYDLLIVGPGVLGR   | Y | 94   |
| 9758 | LOC_Os01g27040 | IAMQLRKCCNHPYLFQGAEPGPPYT   | Y | 510  |
| 9759 | LOC_Os01g27790 | KTAFITPIGTICYTTMPFGLKNAGP   | Y | 927  |
| 9760 | LOC_Os01g28560 | APAAQRREHERQYEALDAHTIITKL   | Y | 69   |
| 9761 | LOC_Os01g28660 | SGQLIGSGFRHNYKVALSVRTGTDE   | Y | 324  |
| 9762 | LOC_Os01g31510 | NPVSPHVIK MIGYTESLDKLGFPFS  | Y | 132  |
| 9763 | LOC_Os01g31629 | QHHVQQQQYVDPYRTMVLSPQPDHL   | Y | 15   |
| 9764 | LOC_Os01g32720 | TQAGYGQVKAKEYHRSDSLPVKKQA   | Y | 654  |
| 9765 | LOC_Os01g33000 | ESGDLHGRL LFQYLEFDSFP CREPL | Y | 218  |
| 9766 | LOC_Os01g33440 | INWTQTAFIPGRYILDGC VILHEVL  | Y | 139  |
| 9767 | LOC_Os01g34030 | AAWLAVSELGEEYDTVWDR LRGLRS  | Y | 69   |
| 9768 | LOC_Os01g34290 | AAMGTACKDLHLYYMEKSNVRKPSK   | Y | 1234 |
| 9769 | LOC_Os01g34330 | VLLTPEDSKEKPYVAILKDITETEG   | Y | 185  |
| 9770 | LOC_Os01g34780 | RDYCAQVKDSSVYLAVASNISGSMP   | Y | 128  |

|      |                |                           |   |      |
|------|----------------|---------------------------|---|------|
| 9771 | LOC_Os01g35470 | PTSKFFRGILNFYGISLHHLNPSI  | Y | 81   |
| 9772 | LOC_Os01g35730 | DTHEIVVFSHFFYGGFALPTSKFFR | Y | 63   |
| 9773 | LOC_Os01g36790 | HGHLTEKADVSYGILVLELVTGQR  | Y | 527  |
| 9774 | LOC_Os01g37790 | ATKRKRSNIGQAYENSRRKDRRRPL | Y | 293  |
| 9775 | LOC_Os01g37832 | PENFGGDTTKIYYIGLRGEATQNKR | Y | 161  |
| 9776 | LOC_Os01g37832 | WELAENLQGVLEYQTRYSRFQGVAN | Y | 131  |
| 9777 | LOC_Os01g40050 | VRNFVQLCLEGYDGTFLHRVIKSF  | Y | 49   |
| 9778 | LOC_Os01g40370 | TNNLSQALRYGIYSNDDMEENQGTL | Y | 95   |
| 9779 | LOC_Os01g40750 | ETDFCTTKSLCYHREYKTNDSSET  | Y | 144  |
| 9780 | LOC_Os01g40750 | FAVRDYLDPLRNYVFNRTRDDPVIV | Y | 202  |
| 9781 | LOC_Os01g40990 | YGSNFGSDTWQYCLRLRDKKLAQ   | Y | 1344 |
| 9782 | LOC_Os01g41640 | SADDEILVRDVLVDALILVDSFIN  | Y | 285  |
| 9783 | LOC_Os01g42410 | LWYLFFMYFTLLYFTFYGMMAVGLT | Y | 1317 |
| 9784 | LOC_Os01g43340 | RERVARKLLQVDYVSTNDQVADGFT | Y | 1275 |
| 9785 | LOC_Os01g43410 | PGEHFKDLVGSAYYVAPEVLKRYG  | Y | 232  |
| 9786 | LOC_Os01g43420 | QLYSASEYCEKSYLHSEQKQMVLDN | Y | 69   |
| 9788 | LOC_Os01g46750 | GEYVAVENLENIYGLVSAIDSIWVY | Y | 536  |
| 9789 | LOC_Os01g46750 | SGAAPLATHVEEYLRVVTCAHVLQG | Y | 402  |
| 9790 | LOC_Os01g46840 | KMSMVESSKCGYEKVGADVQKCSP  | Y | 481  |
| 9791 | LOC_Os01g46980 | KEKQVEVRKKIEYSMLNASRIKVL  | Y | 70   |
| 9792 | LOC_Os01g47490 | RTPHITKDHDRAFYDSADWALGKQG | Y | 69   |
| 9793 | LOC_Os01g48640 | TISLVAYVENDRYVYSEKRPSCPPP | Y | 219  |
| 9794 | LOC_Os01g49200 | TEPNTLSTDFLNYVESEVLRLEQLK | Y | 298  |
| 9795 | LOC_Os01g49250 | SEYGSTLDDDQRYADAAEVLAAAAA | Y | 76   |
| 9796 | LOC_Os01g49470 | TPSCNGLSMAKYCNICKFFDDERT  | Y | 1059 |
| 9797 | LOC_Os01g49529 | LNIAVESAAALTYLHAIEPPIVHRD | Y | 497  |
| 9798 | LOC_Os01g50320 | LLDRVPPRPRRSYSAALLSAPSLDG | Y | 61   |
| 9799 | LOC_Os01g51200 | TKHPQLLYESKIYRILQGGTGIPNV | Y | 56   |
| 9800 | LOC_Os01g51230 | GNGATRSNHSWSYLEGWMATKPWES | Y | 247  |
| 9801 | LOC_Os01g51390 | PIALDVLSDILQYPCFPANALQRER | Y | 164  |
| 9802 | LOC_Os01g52304 | LEWQSSIPPYYSYIVQYGILARQPL | Y | 344  |
| 9803 | LOC_Os01g52950 | AVQRRDDESLRSYIQRFCQVRNTIP | Y | 337  |
| 9804 | LOC_Os01g54590 | GQERYRAITSAYYRGAVGALLVYDV | Y | 88   |
| 9805 | LOC_Os01g55040 | HRLDFFRSLSVFYTTVGIFYNTMMV | Y | 1358 |
| 9806 | LOC_Os01g55260 | VPYDTLVEKTEGYSGSDIRLVCKEA | Y | 304  |
| 9807 | LOC_Os01g55490 | AALQQKINKFLAYKRAGKSFNSEVR | Y | 253  |
| 9808 | LOC_Os01g56300 | SYHMAGLSHGLPYGGSVSFGSPNLP | Y | 246  |
| 9809 | LOC_Os01g56490 | VSDEQFAKWKFAIYAHNRLAGEYFQ | Y | 1047 |
| 9810 | LOC_Os01g57630 | ITERNMVPDAKNYNKRLGLVAQGR  | Y | 272  |
| 9811 | LOC_Os01g58620 | VNLLGLLVQSVFYACKAFHNQQID  | Y | 288  |
| 9812 | LOC_Os01g58870 | LYTSSVLPICALYSLSLWFSNSAYI | Y | 109  |
| 9813 | LOC_Os01g59760 | AHHHGQQGVQAYFPNRLVPQPLNV  | Y | 207  |
| 9814 | LOC_Os01g59990 | KTELCRFSGQKIYPGKGRFIRADS  | Y | 16   |

|      |                |                             |   |      |
|------|----------------|-----------------------------|---|------|
| 9815 | LOC_Os01g60190 | ADRMVMLAKALEYADFDKFDRVRVP   | Y | 299  |
| 9816 | LOC_Os01g61660 | YFQAHRVTVVTSYPFGQILHNREGT   | Y | 1270 |
| 9817 | LOC_Os01g61930 | GFQNQYANLAPTYQPGTTYSQLPL    | Y | 350  |
| 9818 | LOC_Os01g62310 | REHGHIIEGKNVFYWFQNHKARQRQK  | Y | 91   |
| 9819 | LOC_Os01g62310 | SFMPVATNNASYYPQQQTPLLPGM    | Y | 180  |
| 9820 | LOC_Os01g62890 | YSKWT SRLKCNLYYYRTNYFILIMF  | Y | 52   |
| 9821 | LOC_Os01g63170 | WRKFVSKVREKGYS LAIVVQKTKCV  | Y | 102  |
| 9822 | LOC_Os01g64250 | CPVAWRVRVALLYKAAAPVHFTPSE   | Y | 83   |
| 9823 | LOC_Os01g64280 | EESPEYEKLNKNI FELENHLAEAQ   | Y | 192  |
| 9824 | LOC_Os01g64670 | DKIIA VCVDDPEYRHYN DLSELSPH | Y | 149  |
| 9825 | LOC_Os01g65260 | GVVGDPDATSLCYLGLQKLQHRGEE   | Y | 102  |
| 9826 | LOC_Os01g66350 | SLVTSFAFLSCGYLWSSYHEVRSVV   | Y | 315  |
| 9827 | LOC_Os01g67126 | RRVLT LRGLDQEYEGNVEATGEDYY  | Y | 117  |
| 9828 | LOC_Os01g67134 | YEGNIEATGEDYYVEPADERRPFRA   | Y | 132  |
| 9829 | LOC_Os01g67170 | RRKRDRKRKR RRRYDSDEDDLQ LLE | Y | 446  |
| 9830 | LOC_Os01g68120 | SPGFVPNEEINEYHVGTTGAKVTAD   | Y | 519  |
| 9831 | LOC_Os01g69910 | SSIIDSPVARQQYRRMLKMHKQNKD   | Y | 834  |
| 9832 | LOC_Os01g70160 | RSESTKSLSAKSYNSSFAVVTSEDE   | Y | 164  |
| 9833 | LOC_Os01g70810 | STVLQ TINRLRFYRTQDISSKARNL  | Y | 340  |
| 9834 | LOC_Os01g71540 | DLDKADEWVKIKYAWMAKSLTNDII   | Y | 66   |
| 9835 | LOC_Os01g73300 | NGLCAIAFTDDHYPVRSFAFSL LNTV | Y | 101  |
| 9836 | LOC_Os01g73300 | SAFSL LNTVLEEYHKTFGERWRTAK  | Y | 117  |
| 9837 | LOC_Os01g73950 | HCAAGEVEKALQYFTEMVEKNLEAD   | Y | 406  |
| 9838 | LOC_Os01g74020 | LTRENVASHLQKYRLYVKRMQGLSN   | Y | 169  |
| 9839 | LOC_Os01g74260 | RTLVGKVFRQGFYWPTALNDAVDLV   | Y | 1569 |
| 9840 | LOC_Os01g74370 | KQMQQVVVG VVYYLCRQDQG LDHPH | Y | 44   |
| 9841 | LOC_Os01g74470 | YSFTNETLAKYSYATSLQATLRYGI   | Y | 291  |
| 9843 | LOC_Os02g01110 | PQGHRRNENEVRYPVNDYQRPLQQN   | Y | 403  |
| 9844 | LOC_Os02g01170 | LKEGEENTIVNIYNLEEYVTLVVDA   | Y | 634  |
| 9845 | LOC_Os02g01390 | ALVKFMAVVHYAYLQMKMPGGPI     | Y | 721  |
| 9846 | LOC_Os02g01490 | SVSTWGQGGTSEYPPNMVFYA EYPG  | Y | 272  |
| 9847 | LOC_Os02g01560 | QFGQKGIPYLN TYDGR TIRYPDPII | Y | 142  |
| 9848 | LOC_Os02g02290 | RGVHLAFQGDGDYDSQFKSEQAFAD   | Y | 1805 |
| 9849 | LOC_Os02g02410 | WLDENQTAEKEEYEEKLKEVEAVCN   | Y | 622  |
| 9851 | LOC_Os02g02870 | RGGGSGGGGRSYGGSWGGRRSGG     | Y | 107  |
| 9852 | LOC_Os02g03080 | AKVALRRVELVYYKPQEVYDSMRKL   | Y | 439  |
| 9853 | LOC_Os02g03080 | VRVNESSTVPNMYIKALVLLEDFLA   | Y | 121  |
| 9854 | LOC_Os02g03890 | ATQVGTYFLRNYYNLLQQSPDVVHQ   | Y | 21   |
| 9855 | LOC_Os02g03890 | GVAIRSRKETGGYYAFVEFEELSGV   | Y | 353  |
| 9856 | LOC_Os02g04450 | GDNGTTIKTEASYSGNSDFGFCNES   | Y | 205  |
| 9857 | LOC_Os02g04660 | DPLPEQERFEIN YRDFLQSPLQPLM  | Y | 317  |
| 9858 | LOC_Os02g05330 | DMGLQENLLRGIYAYGF EKPSAIQQ  | Y | 57   |
| 9859 | LOC_Os02g06430 | KEDVAEKSDGKG YHVHRSRMAGGLD  | Y | 319  |

|      |                |                            |   |      |
|------|----------------|----------------------------|---|------|
| 9861 | LOC_Os02g07210 | HYEGYVMEYKVYLKKMKRSGEWD    | Y | 141  |
| 9862 | LOC_Os02g09170 | EEVITGYDETDLKYKTWLRANAMRSP | Y | 106  |
| 9864 | LOC_Os02g10650 | GQSTYDKASVHYVYQSHIQINEYRD  | Y | 122  |
| 9865 | LOC_Os02g11760 | FLECAVWICMTYYVMGFDPNIEFF   | Y | 626  |
| 9866 | LOC_Os02g12310 | EVPTAVKRRFVFYLGHHQPSGSNNN  | Y | 119  |
| 9867 | LOC_Os02g12310 | NVDPWQLPAMAMYGSDHDRYFFTMA  | Y | 63   |
| 9868 | LOC_Os02g12550 | IVNAWAIGRDPYWDAAEEFKPKRF   | Y | 412  |
| 9869 | LOC_Os02g12610 | AGDGGDGGEGVKYLRMERRMGKFMR  | Y | 108  |
| 9870 | LOC_Os02g12850 | STAYGYGRGGYGYGGNAGFGSGYGG  | Y | 311  |
| 9871 | LOC_Os02g13130 | SGGQQQAYDYSSYYQTQGGQQGYSQ  | Y | 461  |
| 9872 | LOC_Os02g13250 | VVHEGFESYDIDYPTADGVSVLGDA  | Y | 346  |
| 9873 | LOC_Os02g13330 | WPIVRGFANPQRYKHFIKSCELAAG  | Y | 75   |
| 9874 | LOC_Os02g13990 | SDNEIVKLENFPYLNRLGTLLVNNN  | Y | 62   |
| 9875 | LOC_Os02g14059 | FGIQEHIDLGIKYDPSTGIYGMDFY  | Y | 118  |
| 9876 | LOC_Os02g17430 | RLDFRATNMAEYEGLLAGLRVAAG   | Y | 1063 |
| 9877 | LOC_Os02g18330 | RKLNTTILLRLYIHKDLKHEYMLE   | Y | 82   |
| 9878 | LOC_Os02g19420 | IVASLLQEIIVVYPALSPPTLSLGA  | Y | 67   |
| 9879 | LOC_Os02g22210 | NTSTHTTEGILDYMYSDLWRPARKT  | Y | 386  |
| 9880 | LOC_Os02g23827 | KLLHTGIIYPISEWVSPVQVVPK    | Y | 526  |
| 9881 | LOC_Os02g25580 | RDLQKMVQALPQYSDQIEKLSLHVE  | Y | 369  |
| 9882 | LOC_Os02g28020 | KKKLRPDGTIEKYKARLVAKYTQK   | Y | 697  |
| 9883 | LOC_Os02g28020 | SISEAYASPDADYWKAVRSEMDSI   | Y | 648  |
| 9884 | LOC_Os02g30680 | GTHMAILDEVNEYGENVLRRAFWSF  | Y | 411  |
| 9886 | LOC_Os02g32340 | GILDDPNEEMFFYANKAVTIDQPAF  | Y | 261  |
| 9887 | LOC_Os02g32490 | ALVPSPKKYQKMYERSINDPAGFWS  | Y | 75   |
| 9888 | LOC_Os02g33540 | DFAMTSSSLSSEYKHSDEQMRADAL  | Y | 172  |
| 9889 | LOC_Os02g34210 | DRHAQSYDVQLQYDTDFGEDRTEAD  | Y | 44   |
| 9890 | LOC_Os02g34460 | EICKYLFQEGVLYAKKDYNLAKHPQ  | Y | 22   |
| 9891 | LOC_Os02g34680 | LKAHMKTHSVDNYHVCKYPECARRF  | Y | 152  |
| 9892 | LOC_Os02g34680 | SAAPPTPSADRPVYCPYDGCAYI    | Y | 221  |
| 9893 | LOC_Os02g35150 | TNSDVSDLETQYQRSSEGSKLGM    | Y | 584  |
| 9895 | LOC_Os02g35800 | NTIPSIPAHAIVIYAFRGGVRHNRML | Y | 358  |
| 9896 | LOC_Os02g36974 | RGNEDRCTLIKEYRGKIETELSKIC  | Y | 92   |
| 9897 | LOC_Os02g38250 | ESEDEMDGRIAPYHLMKRSLEKSI   | Y | 118  |
| 9898 | LOC_Os02g38840 | FGTEGRGGYFDQYGIIRDIIQNHLL  | Y | 263  |
| 9899 | LOC_Os02g40880 | RFVEIGRVALVNYGKDYGRLLVVIVD | Y | 17   |
| 9900 | LOC_Os02g40930 | QWPKDLIEIRLQYDTDFGEDRTEAD  | Y | 347  |
| 9901 | LOC_Os02g41990 | GLARKEDYPHITYYCPHCHALNTSK  | Y | 320  |
| 9902 | LOC_Os02g41990 | PMFVLPAVSSVIYSTVVKFTRMLER  | Y | 123  |
| 9903 | LOC_Os02g42040 | NGKDHEGADSESYSDSGSIDGHEDE  | Y | 864  |
| 9904 | LOC_Os02g43370 | DIGNPDGYWKAPYALIFRNMAILGV  | Y | 543  |
| 9905 | LOC_Os02g43370 | FFNKDYIPNWLAYAGYALLSIVAVI  | Y | 394  |
| 9906 | LOC_Os02g43870 | GVGAQGGVGAGAYGRADALVKFPGG  | Y | 108  |

|      |                |                            |   |     |
|------|----------------|----------------------------|---|-----|
| 9907 | LOC_Os02g44690 | KHWIGLAVTSAAYFLPYKQLANMSE  | Y | 58  |
| 9908 | LOC_Os02g44740 | PSSPPRSPRRSAYYVLSAASHPDV   | Y | 28  |
| 9909 | LOC_Os02g44810 | ARTIEGDLEEALYRAGAVPEADRAA  | Y | 83  |
| 9910 | LOC_Os02g44820 | LPAAAKERLRVYFVHPGFQARLFF   | Y | 145 |
| 9912 | LOC_Os02g45070 | IDNHGTVKTVVQYFQETYGFNIKHT  | Y | 496 |
| 9913 | LOC_Os02g45070 | QLGEGLESWRGFYQSIRPTQMGLSL  | Y | 394 |
| 9914 | LOC_Os02g46090 | LEREEHLVAAFSYFDKDGSGYITVD  | Y | 476 |
| 9915 | LOC_Os02g46956 | ADSDLAVVLNAWYAAGFYTGRYLMQ  | Y | 325 |
| 9916 | LOC_Os02g46962 | KKRIMLKDARVQYLSLVLETIVKN   | Y | 102 |
| 9917 | LOC_Os02g47810 | PRCESTHTKFCYNNYSLSQPRYFC   | Y | 78  |
| 9918 | LOC_Os02g47900 | DLHGVPMRGRFAYDENSKVILQEGY  | Y | 336 |
| 9919 | LOC_Os02g48180 | YKKDGYNDFTFYMQVRKFISYQIL   | Y | 196 |
| 9920 | LOC_Os02g49070 | WNEVLKISIPRNYGPLKLEVYDHT   | Y | 235 |
| 9921 | LOC_Os02g49590 | QRIKFKLKLVMYMAAGFYTYSIFAL  | Y | 127 |
| 9922 | LOC_Os02g50910 | MRKSIRASHSLHYSKNSFLWSDDMD  | Y | 258 |
| 9923 | LOC_Os02g51200 | FQLRRGEVAVSLYHPQAFLIKQHR   | Y | 72  |
| 9924 | LOC_Os02g52280 | KAGVDAKELFHLIYIVLWIEDKRRTL | Y | 709 |
| 9925 | LOC_Os02g52390 | KGSLHTFLNAFTYPRDTCYPVASTN  | Y | 196 |
| 9926 | LOC_Os02g52390 | LYQSGYQLNGSAYVISKHISNTWLW  | Y | 915 |
| 9927 | LOC_Os02g52820 | VDSTTLQLHNLLEYKNHYVKAIRAC  | Y | 116 |
| 9928 | LOC_Os02g53270 | DNEELLLYLLKAYGERDSTQNLLDK  | Y | 363 |
| 9929 | LOC_Os02g53780 | LQPSSSLEERRYDGRFSDQQMALL   | Y | 206 |
| 9930 | LOC_Os02g54700 | EDAekaISKLNgyGyDNLILrVewa  | Y | 272 |
| 9931 | LOC_Os02g54770 | QYRKsPTyGRrSYSPDRSPRRRSV   | Y | 139 |
| 9933 | LOC_Os02g55020 | SMMEDGGLESDEYTFailVnGLCKM  | Y | 339 |
| 9934 | LOC_Os02g55330 | ELRAHLRVNIMSyDYSgyGASTGKP  | Y | 68  |
| 9935 | LOC_Os02g55330 | FWRHPSARLTLLYSHGNAADLGQML  | Y | 39  |
| 9936 | LOC_Os02g55420 | FNDAKVPWSEYRYYPKTVGLDFEG   | Y | 205 |
| 9937 | LOC_Os02g55420 | VQRGLEVFVAQSYsKNLGLYAERIG  | Y | 301 |
| 9938 | LOC_Os02g55560 | RSGDWSDIGGRDYMEDAHVCISDLA  | Y | 66  |
| 9939 | LOC_Os02g56210 | IEVSMWQQRVRLYIITGVKGDVFA   | Y | 186 |
| 9940 | LOC_Os02g56740 | PTLQLHNNMEDCYIDICSPEVLSLF  | Y | 236 |
| 9941 | LOC_Os02g57260 | SASACAAGDSAAyQRTSAYGDDVVV  | Y | 39  |
| 9942 | LOC_Os02g57660 | NWLDGMMHGYGIYTWNECGYYVGTw  | Y | 219 |
| 9943 | LOC_Os02g57700 | AVIEAENLRHEAYEETRRRQKVERD  | Y | 351 |
| 9944 | LOC_Os03g01040 | ALVKFMAAVHYAYLQMKMPGGPI    | Y | 691 |
| 9945 | LOC_Os03g01490 | PHICISIDGVGTyCLNTASHTWIKV  | Y | 254 |
| 9946 | LOC_Os03g01710 | QDEVSKEFDECQYKIVSVGSIKSG   | Y | 88  |
| 9947 | LOC_Os03g02680 | EQSWPGVSSLPDYKSAFPKWQAQDL  | Y | 275 |
| 9948 | LOC_Os03g03034 | LITDGSPAVYRNYTYDEYYKKFWSR  | Y | 311 |
| 9949 | LOC_Os03g03060 | FTIMHDVEKEYGYEISYDKAWRAKQ  | Y | 366 |
| 9950 | LOC_Os03g03830 | KQVLDSREKLEYyRTKMqDLVLYKS  | Y | 633 |
| 9951 | LOC_Os03g03870 | TDRFGDYSGPSKYGKKTPTISDDE   | Y | 160 |

|      |                |                           |   |      |
|------|----------------|---------------------------|---|------|
| 9952 | LOC_Os03g04050 | VSESGEKAPNFVYRGRLQRTTAAIA | Y | 86   |
| 9953 | LOC_Os03g04460 | VPDQKSGKLDLQYLHDFALNSTIG  | Y | 110  |
| 9954 | LOC_Os03g04520 | GPLAAYRFLFNEYLGACAFLEYID  | Y | 622  |
| 9956 | LOC_Os03g04590 | RQRKPWRRKDGVMYFEDNAGVIVN  | Y | 95   |
| 9957 | LOC_Os03g04920 | VLKDGHITQAGKYDDLQAGTDFNA  | Y | 830  |
| 9958 | LOC_Os03g04960 | DKALEIASDRVYIYQTLYDCEEVL  | Y | 326  |
| 9959 | LOC_Os03g06120 | LLVHSCQDRSYLLAMGWNIVYQF   | Y | 98   |
| 9960 | LOC_Os03g06200 | SSPAAAAADRGVYNFAAGPATLPLS | Y | 66   |
| 9961 | LOC_Os03g06540 | EGDPLGPNDATHYRSVVGALQYLTL | Y | 1029 |
| 9962 | LOC_Os03g06540 | KARLVAKGFKQRYGIDYEDTFSPVV | Y | 812  |
| 9963 | LOC_Os03g06950 | SISLVVKNMNMGYTPEDKVRVFPIR | Y | 200  |
| 9964 | LOC_Os03g07580 | DFDYIQEDRLKIYELLSGNVQGALV | Y | 610  |
| 9965 | LOC_Os03g07840 | RRCGWLDIVALKYCCEINGFSSLNL | Y | 380  |
| 9966 | LOC_Os03g08220 | PGPVSGEISAAYYRNHWRFDLEGLP | Y | 645  |
| 9967 | LOC_Os03g08360 | DELWRKVWGEATYDLATVLAFLAVL | Y | 95   |
| 9969 | LOC_Os03g10340 | SLADLQNDQAYRKIRLRAEDVQG   | Y | 81   |
| 9970 | LOC_Os03g10460 | SFLEENYSKAKFYRLKRRNGRVKH  | Y | 248  |
| 9971 | LOC_Os03g10510 | KGGLYTLDVSSVYKYKSTLVDVKVD | Y | 61   |
| 9972 | LOC_Os03g11200 | IEVYERAVLAVTYSVDIWNVCQFA  | Y | 205  |
| 9973 | LOC_Os03g11220 | KEGSAGSGGGKYQDEGGEGYKKK   | Y | 114  |
| 9974 | LOC_Os03g12010 | HWHWHKRCCTGSYHRVQSSSGCVE  | Y | 195  |
| 9975 | LOC_Os03g13300 | RMPENSIPKEAAYQIINDELMLDGN | Y | 43   |
| 9976 | LOC_Os03g13614 | STGPVVLNPMMPYWPVPPMAGPAT  | Y | 241  |
| 9977 | LOC_Os03g13720 | SASQLIRNYIIGYHVLPTMLESSF  | Y | 470  |
| 9978 | LOC_Os03g13890 | PIQLAIDEVWAQYVQRGGLRKTGHD | Y | 520  |
| 9979 | LOC_Os03g14260 | DMLDAKYWEINMYKSALEGRKDEIG | Y | 333  |
| 9980 | LOC_Os03g14450 | RAAVPSGASTGVYEALERDGGSDY  | Y | 47   |
| 9981 | LOC_Os03g15650 | LLAQKELQKINMYKAPRDKLACILN | Y | 158  |
| 9983 | LOC_Os03g15810 | DELVQLVDTMVSYSITYRNTKLEPQ | Y | 829  |
| 9984 | LOC_Os03g15900 | LISPMLKVLDEMYRAQDDLARDIRQ | Y | 714  |
| 9985 | LOC_Os03g16310 | SIDDGLARFLGGYKLDKFAFKPARG | Y | 57   |
| 9986 | LOC_Os03g16369 | QHTPSRVGMHNSYSKDGMSSEDAIK | Y | 643  |
| 9987 | LOC_Os03g16700 | LVSSDSTGEMPLYGNKIRRSTSFPR | Y | 235  |
| 9988 | LOC_Os03g16800 | NGNGYGYGGYDDYRERNGNNTDDK  | Y | 209  |
| 9989 | LOC_Os03g16800 | WCKETGVARSEYPEVQRVTDKLE   | Y | 336  |
| 9990 | LOC_Os03g17170 | AFDQQNHGAVPQYHDRSGSEDKNGF | Y | 122  |
| 9991 | LOC_Os03g18454 | AAAAGEKVPLALYYETLCPYCSRFI | Y | 44   |
| 9992 | LOC_Os03g18600 | FRVVGGEHRLKNYLSVTTVHPSPSA | Y | 162  |
| 9993 | LOC_Os03g19040 | DPEMKRRRRVASYKAYSVEGKVKSS | Y | 90   |
| 9994 | LOC_Os03g19530 | KLGGFSIPRPTSYSFERSQPPQRLY | Y | 18   |
| 9995 | LOC_Os03g19870 | ISVIERRADQLDYVLVDTPGQIEIF | Y | 152  |
| 9996 | LOC_Os03g19990 | DVEGFVRVTHSRYENSTPAWTVFST | Y | 674  |
| 9997 | LOC_Os03g20080 | YKKGQVSIFLLIYVDDIIVASSVPD | Y | 1024 |

|       |                |                            |   |      |
|-------|----------------|----------------------------|---|------|
| 9998  | LOC_Os03g20680 | QTADATRDKLGEYKDYTADKARETN  | Y | 115  |
| 9999  | LOC_Os03g21470 | EALEAARIACNKYMAKHAGKDAFHL  | Y | 75   |
| 10000 | LOC_Os03g21540 | VVKGSFGYLDPEYFRRQQLTDKSDV  | Y | 713  |
| 10001 | LOC_Os03g22120 | WGLEKGWGDTAGYVLEMIHLLLDVL  | Y | 246  |
| 10002 | LOC_Os03g22190 | DSTAKQMNGPKEYYSATLQKLNERR  | Y | 979  |
| 10003 | LOC_Os03g22320 | EGLLTISDAKENYKIPSQADLIRQA  | Y | 687  |
| 10004 | LOC_Os03g22340 | TSDGPFSKRYLKYLTKKYLKKHNVR  | Y | 88   |
| 10006 | LOC_Os03g23970 | VMNAVGVCGQLQYRYGETISIPFFT  | Y | 130  |
| 10007 | LOC_Os03g23990 | DGSTDLEEFLLQVYSTELATRRVMTT | Y | 422  |
| 10008 | LOC_Os03g23990 | SVPQYPLYPVYGYPPSTVVRQVGGL  | Y | 22   |
| 10009 | LOC_Os03g24050 | PSAAIAGFQRRLYGGHRRPDVPLAG  | Y | 45   |
| 10010 | LOC_Os03g24110 | EKTTFITPIGTICYTTFPFLKNA    | Y | 917  |
| 10011 | LOC_Os03g24790 | NGSQFISADFQDYCIGLVKICFAS   | Y | 357  |
| 10012 | LOC_Os03g25070 | DFEEFSAAAISVYQMEGLETWEQHA  | Y | 521  |
| 10013 | LOC_Os03g27030 | DRGYRDDYDRHYRDDYQDREYRRS   | Y | 144  |
| 10014 | LOC_Os03g27030 | RSRSIERERERYQEKGYRRRSRSI   | Y | 167  |
| 10015 | LOC_Os03g27140 | ARVGFTSELFQDYCEDMGIKLCFTS  | Y | 1636 |
| 10016 | LOC_Os03g28330 | QMNRVRNGELYRYICDTKGAFVQPA  | Y | 663  |
| 10017 | LOC_Os03g28960 | QVQVCRKCGLGYNHKLKASYCSM    | Y | 1106 |
| 10018 | LOC_Os03g29035 | YGVHLRGLRGAAYILGIRIYRERSK  | Y | 500  |
| 10019 | LOC_Os03g29075 | SVPQYPLYPVYGYPPSTVARQVGD   | Y | 22   |
| 10020 | LOC_Os03g29085 | WPTALKDACDMDYICIGLVKICFAS  | Y | 802  |
| 10021 | LOC_Os03g29260 | VFTSLPSAPAASYVNVTRWYDHISA  | Y | 51   |
| 10022 | LOC_Os03g32630 | NDADDNERLAEVYEKLNLRSDAAR   | Y | 267  |
| 10023 | LOC_Os03g35560 | LDVSYALSATSRYQSDLGESHWIAV  | Y | 1071 |
| 10024 | LOC_Os03g39380 | RHLPSLRRTFSLYDQINLIDSVPED  | Y | 43   |
| 10025 | LOC_Os03g39650 | DKLTEDDVAKLSYLQLVIKETLRLH  | Y | 358  |
| 10026 | LOC_Os03g40110 | PARKEKGWVDEIYEREGKKIGEDAE  | Y | 377  |
| 10027 | LOC_Os03g40180 | VMRFVQVRRCWEYRQQAIVRLTRP   | Y | 30   |
| 10028 | LOC_Os03g43670 | EDLKIRRAQEFSYEELEQATGGFSE  | Y | 494  |
| 10029 | LOC_Os03g43800 | EAETGDYPKYASYLMNNEGSASGKS  | Y | 396  |
| 10030 | LOC_Os03g44020 | AGVDWWAYGVFLYELLYGRTPFVGA  | Y | 348  |
| 10031 | LOC_Os03g44310 | PMHPSVYKVGLQYLSGEVSGNGRC   | Y | 298  |
| 10032 | LOC_Os03g44800 | RHLARLRSTLREYRHTCLRLGIPLA  | Y | 163  |
| 10033 | LOC_Os03g44900 | GRPEISADQREKYLQRLQQVQQQGS  | Y | 534  |
| 10034 | LOC_Os03g45140 | FCNVLMRGPDQYWRIDPRWVPLR    | Y | 858  |
| 10035 | LOC_Os03g45140 | HDVEKEYGYEISYDKAWRAKQKALE  | Y | 370  |
| 10036 | LOC_Os03g45480 | PIQLAIDKAWAQYVQRGGLRKTGHD  | Y | 311  |
| 10037 | LOC_Os03g46570 | VRQPAAAEVMRQYSQVCAAAADAAE  | Y | 81   |
| 10038 | LOC_Os03g46590 | RYGIMTTNLAEVYNWVMRGVRLPL   | Y | 644  |
| 10039 | LOC_Os03g46600 | PLAPHGVESLDLYQCPVTAKAGYRD  | Y | 137  |
| 10040 | LOC_Os03g46710 | VKENRNFGSTPPYKVEPPTLDLAD   | Y | 646  |
| 10041 | LOC_Os03g47800 | YGGGRDRYANDRYPSGGDRYVPDRY  | Y | 195  |

|       |                |                            |   |      |
|-------|----------------|----------------------------|---|------|
| 10042 | LOC_Os03g47890 | PGPEMMVDLRDYGSGVGTAVRMD    | Y | 49   |
| 10043 | LOC_Os03g47930 | LDDVDIDQVSDYVLNCAKKGEALD   | Y | 54   |
| 10044 | LOC_Os03g48140 | LSIQQLYRISTMYWDDKYGTHTVSS  | Y | 1493 |
| 10045 | LOC_Os03g48674 | VWTQVGEIVFPVYTTVPISAGPSMT  | Y | 37   |
| 10046 | LOC_Os03g48930 | KNPYVNVLLAGYDSDV GASLYYID  | Y | 106  |
| 10047 | LOC_Os03g49400 | SGVTKHDFS NKEYEVKLLQSLRFCI | Y | 1076 |
| 10048 | LOC_Os03g49800 | ILYFGIIDILQDYDITKRLEHAYKS  | Y | 687  |
| 10049 | LOC_Os03g50350 | NNNLMGQFHNALYLG DAMKRVEILE | Y | 740  |
| 10050 | LOC_Os03g50390 | VFAGDLVGVMEKYADSHPEWKETLE  | Y | 335  |
| 10051 | LOC_Os03g51360 | EDRPRRKVQRPVYFVSEALRDAKTR  | Y | 616  |
| 10052 | LOC_Os03g51360 | NRAVPRDVIKSAYNKKKARRPRKKK  | Y | 463  |
| 10053 | LOC_Os03g51600 | VDVNEFQTNLVPIPRIHFMLSSYAP  | Y | 262  |
| 10054 | LOC_Os03g52490 | GNNQGGYNQGGGYDNQGGYGGYDN   | Y | 201  |
| 10055 | LOC_Os03g52970 | NRIGNLLVPNDNYCKFENWIMPLFD  | Y | 184  |
| 10057 | LOC_Os03g56241 | GHSNVWNSHPKNYGPSRVCRCGN    | Y | 14   |
| 10058 | LOC_Os03g56430 | TDVHSMPPKKSQKYREMKSEKGIQNL | Y | 583  |
| 10059 | LOC_Os03g56790 | VVVEKTGATTESYDDFLASLPENDC  | Y | 59   |
| 10060 | LOC_Os03g56800 | APRLFSQGVSYTYDDVIFLPGYIGF  | Y | 27   |
| 10061 | LOC_Os03g56900 | VIGGWCNFLTVIYIGFVSAHTLPVL  | Y | 190  |
| 10062 | LOC_Os03g58590 | LDLDRESQINVKYWEALMVCDWEL   | Y | 288  |
| 10063 | LOC_Os03g58590 | NLDSQVYWWHDKYRPRPKYFN RVH  | Y | 552  |
| 10064 | LOC_Os03g58740 | RPQEVHHRPTKSYTGNPPQPLEKDA  | Y | 223  |
| 10065 | LOC_Os03g60460 | NEDFWLNEGFTTYAERRIVEVVQGE  | Y | 333  |
| 10066 | LOC_Os03g60870 | AGQERYRAITSAYYRGAVGALLVYD  | Y | 81   |
| 10067 | LOC_Os03g61340 | RGYRCVAPDLRGYGTTAPPEHTSY   | Y | 69   |
| 10068 | LOC_Os03g62600 | AYYRGAVGALLVYDVTKATTFENVK  | Y | 98   |
| 10069 | LOC_Os03g62700 | RVLGTFGYHAPEYAMTQGLTQKSDV  | Y | 248  |
| 10070 | LOC_Os03g63140 | TGNAPVMTSEADYIKRYQQRYEST   | Y | 220  |
| 10071 | LOC_Os03g63320 | EASGAQAAAGPPYSKR RRRPSVRLG | Y | 47   |
| 10072 | LOC_Os03g63590 | ATKAIYRLLLSDYVKVSKVSVEDML  | Y | 129  |
| 10073 | LOC_Os03g63590 | SFEVIKYRLKQIYESVESSTEESDV  | Y | 550  |
| 10074 | LOC_Os03g63650 | RGR TTSVYRSGYYRPGMVQDDMAVP | Y | 42   |
| 10075 | LOC_Os03g63670 | QPQPSGYSIDPRYQPSFSGVLPGTS  | Y | 382  |
| 10076 | LOC_Os03g64340 | PPPPPPPPPPVYYSSYVMLDRPPP   | Y | 368  |
| 10077 | LOC_Os03g64340 | VTGTVSGDKLAEYIHRRTGKLATVV  | Y | 205  |
| 10078 | LOC_Os04g01480 | LEGILESPVINGYRNKCEFSVG FSL | Y | 315  |
| 10079 | LOC_Os04g02000 | ASANWPYALAGRYGMAAGWPFGGN   | Y | 153  |
| 10080 | LOC_Os04g02150 | LPLLSYSAPFAIYHQYLQPLATCMH  | Y | 436  |
| 10081 | LOC_Os04g02320 | HAADLVQLRPTAYHETSPMQLVRGN  | Y | 204  |
| 10082 | LOC_Os04g02320 | REEFLLLTQNGYGKICEKIPSLK    | Y | 52   |
| 10083 | LOC_Os04g02370 | CIQGGCPWRVHGYKQHDTLWVASR   | Y | 500  |
| 10084 | LOC_Os04g02500 | KLAHEFESHLSSYDHNHRKRFKEMK  | Y | 266  |
| 10085 | LOC_Os04g02820 | TYEDTLLGDVQVYPEKGTVAFSAGL  | Y | 203  |

|       |                |                            |   |      |
|-------|----------------|----------------------------|---|------|
| 10086 | LOC_Os04g02870 | YAFRDDTERGDRYDGARGGYGRRDD  | Y | 174  |
| 10087 | LOC_Os04g04220 | RYNVMTTNLAELYNWVMPDTRALPF  | Y | 46   |
| 10088 | LOC_Os04g06770 | VGRKVIDKLQQTYSSELSSKDFAYD  | Y | 108  |
| 10089 | LOC_Os04g07250 | LLHLGGPDNITAYSLEDNKLWKRHL  | Y | 97   |
| 10091 | LOC_Os04g08440 | ISKRYVLVEGTLYRRAANGILLKCI  | Y | 1566 |
| 10092 | LOC_Os04g08480 | DRHAQSYDVQLQYDTDFGDDRTEAD  | Y | 611  |
| 10093 | LOC_Os04g09860 | IDMLMLNKLKESYSQIRSGSFDAVS  | Y | 362  |
| 10094 | LOC_Os04g17440 | EEAERALTQLKAYLSSPPVLVAPEP  | Y | 1111 |
| 10095 | LOC_Os04g17440 | YAVLMASRKLRYHFQAHRTVTVTSY  | Y | 1355 |
| 10096 | LOC_Os04g18010 | SCRGIWTVYYKSYRGQMAEDNEYHA  | Y | 54   |
| 10097 | LOC_Os04g19990 | SHTDPKQPFHEWYTSQGSKTIRIAV  | Y | 74   |
| 10098 | LOC_Os04g22060 | QLLAYDNALTTRYFLTKFVDGLKDD  | Y | 258  |
| 10099 | LOC_Os04g22180 | YIVVDFKDLFDLYRLRAVDTSLLKC  | Y | 183  |
| 10100 | LOC_Os04g22400 | PPDGRFQIQGVYDETFSPVTMLKS   | Y | 484  |
| 10101 | LOC_Os04g22400 | QRFERIRRTPARYALLTTGQHDILL  | Y | 417  |
| 10102 | LOC_Os04g23060 | FEARSTDGLFLGYPAHTRGYRVLIL  | Y | 357  |
| 10103 | LOC_Os04g23060 | VLVEMARTMLDEYKTPRKFWAEAIN  | Y | 282  |
| 10104 | LOC_Os04g26900 | ELKKLVEEGKVKIYIGLCEASASTIR | Y | 17   |
| 10106 | LOC_Os04g28180 | AVTRKTRILDVVYNASNNELVRTQT  | Y | 84   |
| 10107 | LOC_Os04g28770 | QKIHACENYCILYRKEFADLNSCPT  | Y | 191  |
| 10108 | LOC_Os04g28770 | WYLRVKDRLKRLYSNRDDAKLMRWH  | Y | 252  |
| 10109 | LOC_Os04g30010 | SACYNTSSRDMDYNDWQINFGTGPL  | Y | 124  |
| 10110 | LOC_Os04g31180 | VTLFACGSEHKYRLAKWSILCKPK   | Y | 460  |
| 10111 | LOC_Os04g31260 | FWEDKWLGYHLSYPVATYLGYPPT   | Y | 69   |
| 10112 | LOC_Os04g31330 | SPLGRHLVKLISYLEANLEESKLY   | Y | 501  |
| 10113 | LOC_Os04g31500 | ALVKFMAAVHYAYLQMKMPGPGWPH  | Y | 721  |
| 10114 | LOC_Os04g32650 | IIDMTGNTIGKRYARTDEIGVPLAI  | Y | 598  |
| 10115 | LOC_Os04g34400 | LRLPLKIKIFLWYLKEGVILTKDNL  | Y | 496  |
| 10116 | LOC_Os04g35240 | KTADVWSCGVTLVYMLVGAYPFDP   | Y | 191  |
| 10117 | LOC_Os04g35260 | SDFLSGKDRPRWYDGRREVHIHPSS  | Y | 1311 |
| 10118 | LOC_Os04g35950 | WPPRFWPTIAEKYDGSVNPAEFLQV  | Y | 245  |
| 10119 | LOC_Os04g37640 | GEGGRDPPPPWYVHLRHDYTRPGA   | Y | 278  |
| 10120 | LOC_Os04g37640 | SNTTSDAPSECRYLVWTPHAGLGNR  | Y | 184  |
| 10121 | LOC_Os04g37920 | VLQAAGVELGSNYPLPIVGLDAANA  | Y | 478  |
| 10122 | LOC_Os04g38090 | TKVAHFIPVKTTYSGSRLAELYMAR  | Y | 913  |
| 10123 | LOC_Os04g38570 | VLFATSIFENIAYGKDGAEEEEVIE  | Y | 1115 |
| 10124 | LOC_Os04g39980 | SGYVPPGTANPLYEAFGLCDAAPPA  | Y | 86   |
| 10126 | LOC_Os04g41100 | GLSRQYGSPLKPYTQLVVTLWYRAP  | Y | 521  |
| 10127 | LOC_Os04g43140 | IALISPADKAKFYSLCKSLSKENLQ  | Y | 623  |
| 10128 | LOC_Os04g43140 | KKRKKRKRGGDDYALPGDGLVVEC   | Y | 120  |
| 10129 | LOC_Os04g43300 | CMEAKEPVPEEPIEISSDVHGSFDG  | Y | 503  |
| 10130 | LOC_Os04g43430 | SGSPGDVLGAFRYIRCTAGGRPDQF  | Y | 147  |
| 10131 | LOC_Os04g44530 | TSRSPTPFGTAKYMLDKIPKDASSK  | Y | 353  |

|       |                |                            |   |      |
|-------|----------------|----------------------------|---|------|
| 10132 | LOC_Os04g44740 | QNLSNLLRLALLYKYGGVYLDADV   | Y | 284  |
| 10133 | LOC_Os04g45190 | SCSMQLTNRTDDYIAFKVKTSPKK   | Y | 39   |
| 10134 | LOC_Os04g45580 | PQNCQRRGSALNYDAESETLSRAGS  | Y | 677  |
| 10135 | LOC_Os04g45580 | VELRRLSFLKDTYSNGAIASIPNTS  | Y | 822  |
| 10136 | LOC_Os04g46320 | ADFQPRISDFGLYLLNPAAAQQML   | Y | 238  |
| 10137 | LOC_Os04g47380 | CHLVISCQRSPYIYIGGRYLKLSRNV | Y | 142  |
| 10138 | LOC_Os04g47870 | VNRAVMFELVTLYRYSHLGGRLPAY  | Y | 301  |
| 10139 | LOC_Os04g47912 | QYPCGFPTILSWYIAAGILFKSGHY  | Y | 320  |
| 10140 | LOC_Os04g49210 | VSNWRDFLRHLHCYPLESFIDQWPSN | Y | 142  |
| 10141 | LOC_Os04g50890 | EGDSKLFFLATIYALLGIPLSYLIW  | Y | 166  |
| 10142 | LOC_Os04g51060 | LGRKACLEGASLYRQNYSSQLGYMG  | Y | 563  |
| 10143 | LOC_Os04g51540 | PFRRAPGGFEYLYVAIDKFTKWPEA  | Y | 1714 |
| 10144 | LOC_Os04g51700 | GADLDVIIIGGGYSGRRGGEVAQF   | Y | 451  |
| 10145 | LOC_Os04g52200 | EAEELKYNNTYIDTCKITCEVAR    | Y | 87   |
| 10146 | LOC_Os04g52760 | CKGYLSAII IYLYAHDFQQAQKCYN | Y | 129  |
| 10147 | LOC_Os04g52850 | NQLSLYSRETTQYNYQELRQMTANY  | Y | 204  |
| 10148 | LOC_Os04g52850 | SGGKDGPISIRLSYHRHAYGLGEHYN | Y | 306  |
| 10149 | LOC_Os04g52920 | VCTVNNAGVTSEYQTKATDNSSSIE  | Y | 265  |
| 10150 | LOC_Os04g52940 | RLIGADETMYSYGVDSMQWLDDIKV  | Y | 181  |
| 10152 | LOC_Os04g55920 | SPPPNSQLTIFYGGSVCVYDSVPP   | Y | 78   |
| 10153 | LOC_Os04g55960 | GDGEPTDNAARFYKWFTEGKEKEVW  | Y | 161  |
| 10154 | LOC_Os04g56290 | DAIVFESELDRIYLGTPSKIAIIDH  | Y | 237  |
| 10155 | LOC_Os04g56630 | VRRKESESSSKRYNDDDKSSMYGNI  | Y | 765  |
| 10156 | LOC_Os04g56640 | MATSSAYPPPPPYRYLYKDYEKDPS  | Y | 13   |
| 10157 | LOC_Os04g59494 | IMLGCPGTGNLIPYPSIRLSFFLSFH | Y | 903  |
| 10158 | LOC_Os04g59624 | NPSTDNQSVDRAYRIGQMKDVIVYR  | Y | 355  |
| 10159 | LOC_Os05g01040 | GYCISNNQRLLVYDFVPNNLHYHL   | Y | 141  |
| 10160 | LOC_Os05g01360 | DLLEVAIRNIIRYLCASREKDLSSS  | Y | 472  |
| 10161 | LOC_Os05g01480 | MAGTRRAEEYDYLKVVLLIGDSGV   | Y | 13   |
| 10162 | LOC_Os05g02240 | AEFRQRMGAMVRYEERVVGVNIEE   | Y | 737  |
| 10163 | LOC_Os05g02310 | HLRAEIRRRFFEDYKKNNKEVAVND  | Y | 176  |
| 10164 | LOC_Os05g03630 | ADDSLFKQVSEAYDVLSDPQKRAIY  | Y | 53   |
| 10165 | LOC_Os05g03760 | MYSFKVKPCSRAYSHDWTECFVHP   | Y | 227  |
| 10166 | LOC_Os05g05480 | LVPFHVEGGQPSYLIVAGLVFTPLT  | Y | 429  |
| 10167 | LOC_Os05g06980 | QAVADILQDRTDYKSFKKTVARLEE  | Y | 46   |
| 10168 | LOC_Os05g07000 | EERLHSRRDGRGYSRSPRRHDSPSN  | Y | 201  |
| 10169 | LOC_Os05g07120 | IPPEANEVTVQCYAGGEHTAAARTY  | Y | 142  |
| 10170 | LOC_Os05g08300 | FGGSTSYSLKREYKKVEREVCSTSQ  | Y | 197  |
| 10171 | LOC_Os05g08370 | LLERLAYINTIVYPITSIPLIAYCV  | Y | 854  |
| 10172 | LOC_Os05g10540 | YFQAHRVTVVSSYPLGQILHNREGT  | Y | 1307 |
| 10173 | LOC_Os05g10810 | VETVLKLSLPNVYLWLCMFYAFFHL  | Y | 381  |
| 10175 | LOC_Os05g12680 | RVHHKHLVSLVGYCISGGKRLLVYE  | Y | 363  |
| 10176 | LOC_Os05g13510 | KILSMQTDWGGEYKLHTFFNEIGI   | Y | 543  |

|       |                |                            |   |      |
|-------|----------------|----------------------------|---|------|
| 10177 | LOC_Os05g14110 | KRKAQAEVLASEYERPPKHPDPQGS  | Y | 531  |
| 10178 | LOC_Os05g14770 | NGLGAVSPPVRVYGKMMWRSDRLKS  | Y | 224  |
| 10179 | LOC_Os05g14940 | RVVDVETMEWEVYAVYQKEKENLMQ  | Y | 215  |
| 10180 | LOC_Os05g16910 | ITDTFAPQPRSAYNMAEFVEHVHV   | Y | 1342 |
| 10181 | LOC_Os05g19560 | QGANQVRVRYTNPYPGGSSSQQQQQQ | Y | 562  |
| 10182 | LOC_Os05g19850 | LAPGTTPLYKRPYRMAANELAEVKK  | Y | 874  |
| 10183 | LOC_Os05g22990 | LIHCCCVMLTSYYPVQVNPVVRALI  | Y | 333  |
| 10184 | LOC_Os05g23080 | FRIDLAPGTTPLYKRPYRMAANELA  | Y | 852  |
| 10185 | LOC_Os05g23840 | TLGEELRARHRQYVWELGRSPLEAE  | Y | 97   |
| 10187 | LOC_Os05g23940 | CGLCGKVLDDQVYDGEPTFQKGADG  | Y | 35   |
| 10188 | LOC_Os05g23940 | GRRTHVAAACLYIACRQSKKAYLL   | Y | 124  |
| 10189 | LOC_Os05g24460 | ADQDQLRRDDLYLEERRRRAALRA   | Y | 1874 |
| 10190 | LOC_Os05g26890 | LRSYTSVIHANVYQTIKILYEGAKE  | Y | 47   |
| 10191 | LOC_Os05g27820 | MHGWDREGHPVCYNAYGVFKDRDMY  | Y | 174  |
| 10192 | LOC_Os05g30420 | YIGRLIEKHGDDYKAMFMDIKLNTM  | Y | 157  |
| 10193 | LOC_Os05g32600 | WPDVMVLPDYVEYQFVSAPPLRSLF  | Y | 253  |
| 10194 | LOC_Os05g32610 | DKPMLERLRSNPYEGVKTRFVMEVV  | Y | 1220 |
| 10195 | LOC_Os05g33100 | LRKIADKVASSGYFVVVPDFLHGD   | Y | 69   |
| 10196 | LOC_Os05g33380 | DAKKVSPEVIAEYTVRTLQRTVPAA  | Y | 246  |
| 10197 | LOC_Os05g33940 | GGFCISHPSWLMYHHFYARLACALP  | Y | 118  |
| 10198 | LOC_Os05g34900 | NGHKSGANGTFEYPYSAYRDKDAPG  | Y | 260  |
| 10199 | LOC_Os05g37434 | KTTQEHCNQLQYYLGYIHSNKM     | Y | 469  |
| 10200 | LOC_Os05g37434 | RRSHFDPEEFALYQRYQTKVHKEKK  | Y | 358  |
| 10202 | LOC_Os05g39090 | PEIDIWSAGVILYILLCGVPPFWAE  | Y | 264  |
| 10203 | LOC_Os05g40300 | IGGMLCIMGNAQYYIHRAAHGRPKH  | Y | 28   |
| 10204 | LOC_Os05g41790 | SQHEIYRTLHVHAYGEDNRLTHPVV  | Y | 197  |
| 10205 | LOC_Os05g42230 | ESAFVAVKWSVQNYLRPGDAVVLLHV | Y | 81   |
| 10206 | LOC_Os05g43060 | FLYKRVALSSLIYWGIIQPTETELLK | Y | 367  |
| 10207 | LOC_Os05g43570 | DYIAPEVLLKKGYGMECDWWSLGAI  | Y | 337  |
| 10208 | LOC_Os05g44100 | EKVVEVINPEDDYVWVHDYHLMALP  | Y | 223  |
| 10209 | LOC_Os05g44100 | IDQSVPSAVRLAYYTVAECVVVTAV  | Y | 449  |
| 10210 | LOC_Os05g44922 | VIRELVCGLAHMYNVSIIYGIQNGY  | Y | 193  |
| 10211 | LOC_Os05g44922 | YIIGDGTQKGAYEIFKEIRKRLK    | Y | 269  |
| 10212 | LOC_Os05g45420 | IDTPADIYVVMEYVKSSELFDYIVE  | Y | 93   |
| 10213 | LOC_Os05g45660 | NEFLKPAEGERYYGGRGRGRGRGDR  | Y | 331  |
| 10214 | LOC_Os05g46330 | FTSSARTDNLQLYHWVRVNGAPPT   | Y | 90   |
| 10215 | LOC_Os05g46490 | SGAEYVRKEVPLYVFPTRHLLKLD   | Y | 276  |
| 10216 | LOC_Os05g46620 | AAFGEAMLTIGYIYVRQAARELGK   | Y | 186  |
| 10217 | LOC_Os05g48310 | IEGVNTKEEVGWYAGKRIAYVYKAK  | Y | 48   |
| 10218 | LOC_Os05g49230 | QDKFYHLAKEQGYRSRAAFKLLQLD  | Y | 22   |
| 10219 | LOC_Os05g49570 | TAGCDLLCFLDAYSGYHQIRMARED  | Y | 876  |
| 10220 | LOC_Os05g50280 | TTIRFADIKQKRYSVPLMIGILLV   | Y | 294  |
| 10221 | LOC_Os05g50810 | GRELGRGQFGVTYLATHKPTGRRYA  | Y | 128  |

|       |                |                            |   |      |
|-------|----------------|----------------------------|---|------|
| 10222 | LOC_Os05g51070 | FAPLSARPNAGGYRAPELVDARRPT  | Y | 575  |
| 10223 | LOC_Os05g51180 | FGEGDANGFEGGYGGGGGFGDGGLA  | Y | 108  |
| 10224 | LOC_Os05g51280 | TNLQNDRQGMVNYIYDTLWSRRDKE  | Y | 724  |
| 10225 | LOC_Os05g51490 | VKRSIDLFFQYPYNNFLHHHVESII  | Y | 374  |
| 10226 | LOC_Os05g51500 | VFIVALNKVDRLYGWKKCTNAPIGK  | Y | 745  |
| 10227 | LOC_Os05g51754 | ATGSRGKTEKKVYSLPGQKFDPPPEE | Y | 49   |
| 10228 | LOC_Os06g01700 | QGGTRIFGPSQKYSSRDAAHTTLK   | Y | 30   |
| 10229 | LOC_Os06g02130 | LQPNASNGNTQVYMNGREITKIELR  | Y | 362  |
| 10230 | LOC_Os06g02180 | IYGSVTEDVVTGYRMHNRGWKSVYC  | Y | 878  |
| 10231 | LOC_Os06g02370 | REAYRREPAAPAYVMPEEPPAMVEL  | Y | 85   |
| 10232 | LOC_Os06g02510 | PLRPVQCQTLKYNMKSRAGRGFTL   | Y | 65   |
| 10233 | LOC_Os06g04330 | DRQILVSRNSRGYFALGYSLPGEFP  | Y | 41   |
| 10234 | LOC_Os06g04330 | VSRNSRGYFALGYSLPGEFPFSLHE  | Y | 46   |
| 10235 | LOC_Os06g04510 | TGAPCRSERLAKYNQLLRIEEELGD  | Y | 418  |
| 10236 | LOC_Os06g04510 | VVIGMDVAASEFYSEKDPTYDLNFK  | Y | 258  |
| 10237 | LOC_Os06g05040 | LRLIAWIAEIQAYLTDKTLPEDREG  | Y | 1534 |
| 10240 | LOC_Os06g05740 | KVATAARKEDIPYIRCQCERIARE   | Y | 47   |
| 10241 | LOC_Os06g06090 | PQRNSFNDVYIAYELMDTDLHQIIR  | Y | 148  |
| 10242 | LOC_Os06g07350 | RMVLQRACAFVTTYTTREGAEKAAEE | Y | 270  |
| 10243 | LOC_Os06g07350 | YYHGQYPPYPPYGGYMPPRMPYP    | Y | 425  |
| 10244 | LOC_Os06g09880 | PDGKSLLSILDAYEKMKGHEKGLSL  | Y | 613  |
| 10245 | LOC_Os06g10170 | GGKPCLGGVSTWYNDEMCRDMGYEP  | Y | 489  |
| 10246 | LOC_Os06g10170 | PLRWLLSKLAETYFKMQIPMEKHGM  | Y | 302  |
| 10248 | LOC_Os06g12260 | DIASLGARVEELYRPGELAARGSRV  | Y | 562  |
| 10249 | LOC_Os06g12580 | RKPQQEESYGSEYGSYGRKPQAES   | Y | 223  |
| 10250 | LOC_Os06g12610 | IIWYTLMLFMFEYRGARILITEQFP  | Y | 154  |
| 10251 | LOC_Os06g12780 | PNFSLPWQRKRQYSSSSSGFIIGGH  | Y | 190  |
| 10252 | LOC_Os06g13390 | NETNHEGEIVPAYYICGVPGSYYTR  | Y | 101  |
| 10253 | LOC_Os06g13390 | PQSVMKLFQEQFYKDFSLFLTLRHE  | Y | 171  |
| 10254 | LOC_Os06g13680 | AGVLENHEEGRRYAHLRNYVRDK    | Y | 43   |
| 10255 | LOC_Os06g15420 | VLRNAFDDEEKPYLPKHILYRQKEQ  | Y | 440  |
| 10256 | LOC_Os06g16020 | TDDKGLSPGPYKYLRSSFSSVEDAGS | Y | 162  |
| 10257 | LOC_Os06g16280 | VLESSVSLFVGSYILQLIHLPSHL   | Y | 794  |
| 10258 | LOC_Os06g17290 | AVSALNRALSSEYPSKSRSEGRASG  | Y | 76   |
| 10259 | LOC_Os06g19390 | VSQLMVFLWVLYYLITVEGGGATEQ  | Y | 467  |
| 10260 | LOC_Os06g20390 | PQSQFSSPAQSSYSSPSYQGTDPS   | Y | 257  |
| 10261 | LOC_Os06g20390 | VTTPAIAPPASQYKYDSSYQPEVEK  | Y | 434  |
| 10262 | LOC_Os06g20490 | GSLKVHNGTQEGYCGSYLKAWLEV   | Y | 205  |
| 10263 | LOC_Os06g20840 | RGANGIAIKQAAYARKILTQFGMLH  | Y | 293  |
| 10264 | LOC_Os06g21350 | LAYLISCRELRCCYYKANVDGFSATD | Y | 19   |
| 10265 | LOC_Os06g22700 | DGSPPYGRGGRSYGRGSGAPGKEFI  | Y | 54   |
| 10266 | LOC_Os06g23530 | LREILLDTDLSSYSVVMLDEAHERT  | Y | 545  |
| 10267 | LOC_Os06g24810 | EGRRDRERRLLVYGDGSTPQALQA   | Y | 72   |

|       |                |                            |   |      |
|-------|----------------|----------------------------|---|------|
| 10268 | LOC_Os06g26340 | RWYRAPELCGSFYSKYTPAIDIWSI  | Y | 206  |
| 10269 | LOC_Os06g27970 | AGTNPDPVSVVSYLNNLKSSEESLK  | Y | 125  |
| 10270 | LOC_Os06g28140 | NRVPSKSVDKTPYEIWTGKRPSLSF  | Y | 407  |
| 10271 | LOC_Os06g28140 | PDVSYAHSATSQYQSAPVYGGQEEL  | Y | 750  |
| 10272 | LOC_Os06g29430 | EGAVDVRRGASRYTDNNQRSDWRTE  | Y | 349  |
| 10273 | LOC_Os06g30570 | PWKIGFKEDIHTYRSRKRSKRDTEA  | Y | 380  |
| 10274 | LOC_Os06g30570 | VNEPTNVNVKCNVTQMDRDEEQIL   | Y | 54   |
| 10275 | LOC_Os06g32060 | PQTKPYPLDMWKYGSALQQRPELNP  | Y | 1411 |
| 10276 | LOC_Os06g33520 | GLLTDHISENVYKIVFCTTAKVT    | Y | 714  |
| 10277 | LOC_Os06g34710 | MQDLPKRDDGLCYYGAYLQRLIWAQ  | Y | 237  |
| 10278 | LOC_Os06g35030 | AAGKDGGEVREYKSDARKLEELFK   | Y | 57   |
| 10279 | LOC_Os06g36710 | SLSYGQSSSSGYGMGLPPGRDYAS   | Y | 253  |
| 10280 | LOC_Os06g36730 | VWTQVGEIVFPVYTTVPISAGPSTT  | Y | 78   |
| 10281 | LOC_Os06g37440 | VTLADIVMTCNLYYGFVRILIKSFT  | Y | 168  |
| 10282 | LOC_Os06g38120 | FLSPQATGRQAIYIDISMFLAFSSF  | Y | 130  |
| 10283 | LOC_Os06g40640 | QGLDSLGARCAKYYEAGARFAKWRA  | Y | 162  |
| 10286 | LOC_Os06g42030 | LVGRIGPKEYRIYRCIVRYGYHDVH  | Y | 626  |
| 10287 | LOC_Os06g42190 | WPPRFRPTIAEKYDGSVNPAEFLQV  | Y | 245  |
| 10288 | LOC_Os06g43790 | NVCCYESMQAGQYRLKHLGIEKLTQ  | Y | 987  |
| 10289 | LOC_Os06g44030 | LGGHSSCVWSLAYRALLFNLFCHCC  | Y | 582  |
| 10290 | LOC_Os06g45870 | SGKRVTRTKQFAYPIFRPTENKLQK  | Y | 234  |
| 10291 | LOC_Os06g45910 | CKLNPVTQDEDLYTIFSRFGTVTSA  | Y | 259  |
| 10292 | LOC_Os06g45980 | DHQRPSNQTEYEVSQLTKIKRFA    | Y | 597  |
| 10293 | LOC_Os06g46880 | ARGMPPPQAQQLYSHLPPHQPPHF   | Y | 68   |
| 10294 | LOC_Os06g46890 | SKTKKLIAHARYVKAQDDLKRSQA   | Y | 219  |
| 10295 | LOC_Os06g47220 | CRSPVHEHSAAYYGCGGGYDYEDVS  | Y | 16   |
| 10296 | LOC_Os06g49740 | TVHPDCINASNPHYVCSEYCFKRIA  | Y | 64   |
| 10297 | LOC_Os06g50742 | GVAKLDPEKNTLYSMRCYLATGISK  | Y | 455  |
| 10298 | LOC_Os06g51140 | ADMAAADERAGRYPCPLCDRHFPTE  | Y | 56   |
| 10299 | LOC_Os06g51220 | RWKSLTEADKAPYVAKANKLKAEN   | Y | 92   |
| 10300 | LOC_Os06g51250 | PWPKITQADVRYKYMIVFIKVDRDRD | Y | 384  |
| 10301 | LOC_Os06g51270 | EMQRFYREYYKKYIQALQNAADKAD  | Y | 139  |
| 10302 | LOC_Os07g01110 | CPILPGSGAGSSYTYRFNVTGQEGT  | Y | 121  |
| 10303 | LOC_Os07g01110 | LLEASRSRSGVYTRDFPDRPPVMF   | Y | 423  |
| 10304 | LOC_Os07g02610 | LNILRKEMYRGYYTLDRFRCHVHEA  | Y | 102  |
| 10305 | LOC_Os07g02610 | QLNILRKEMYRGYYTLDRFRCHVHE  | Y | 101  |
| 10306 | LOC_Os07g04240 | GNMTEDDWRWHMYDTVKGSDWLGDQ  | Y | 108  |
| 10307 | LOC_Os07g05050 | FKESAPLDSLVCYGGVPISHQMRAL  | Y | 190  |
| 10308 | LOC_Os07g06130 | NNQFYQPATIHGYQLASYLQMNAN   | Y | 830  |
| 10310 | LOC_Os07g07270 | HSFDRSLES GPYTLKYRGS MWGYK | Y | 139  |
| 10311 | LOC_Os07g08960 | YERDGGRS GGSYYRDEPRGSGGYDR | Y | 251  |
| 10312 | LOC_Os07g09060 | LDDAIQIVNRNKYNGASIFTTSGV   | Y | 444  |
| 10313 | LOC_Os07g09384 | VRDGAHARLRTRYGNYLRANGGLPP  | Y | 109  |

|       |                |                            |   |      |
|-------|----------------|----------------------------|---|------|
| 10314 | LOC_Os07g10050 | DSQLVVNQVCKEYRCSDPQMDAYVR  | Y | 1471 |
| 10315 | LOC_Os07g10350 | EARIILSNLSDEYVENPQNDFPVGL  | Y | 377  |
| 10316 | LOC_Os07g10600 | EATCHAPDPVGCYKEIYRVLKPQC   | Y | 237  |
| 10317 | LOC_Os07g10890 | PFPMYHPGAAAAYAHASMAAGVPY   | Y | 87   |
| 10318 | LOC_Os07g12170 | GGQDKIRPLWRHYFQNTQGLIFVVD  | Y | 204  |
| 10319 | LOC_Os07g12910 | HSETLCGTCGGRYNANEFWIGCDIC  | Y | 197  |
| 10320 | LOC_Os07g14270 | YIPDPEDKKPEGYDDIPKEIPDPDA  | Y | 246  |
| 10321 | LOC_Os07g15620 | PKANGKLRLMCIDYTDLNKACPDPY  | Y | 749  |
| 10322 | LOC_Os07g18300 | FSKIDLKLIERLYLPVLKEHHWFLI  | Y | 819  |
| 10323 | LOC_Os07g26690 | CGVGLVKAFQSAYFNRYGGGANTLA  | Y | 155  |
| 10324 | LOC_Os07g27790 | FDDSFGERYVDYALDVPYFVYRN    | Y | 305  |
| 10325 | LOC_Os07g27950 | QCLFHVLCVTVEYRRRREARGGGFG  | Y | 140  |
| 10326 | LOC_Os07g28430 | MQLQELEQQSRVYQYMAARVPVPTH  | Y | 130  |
| 10327 | LOC_Os07g29360 | GPEIDEEYADVKYERIAILNALGAF  | Y | 80   |
| 10328 | LOC_Os07g29450 | LKKGEVIYLETHYNRYELCFSGEKA  | Y | 678  |
| 10329 | LOC_Os07g29520 | KARLVAKGFKQRYGIDYEDTFNPVV  | Y | 536  |
| 10330 | LOC_Os07g30040 | EHRERVAIQATDYQQALRRYHEKRI  | Y | 1193 |
| 10331 | LOC_Os07g30250 | GDATVILRYYCFYVICLAMNGTSEA  | Y | 139  |
| 10332 | LOC_Os07g30820 | SYGAPYPHGLRGYGPVGPASYS     | Y | 124  |
| 10333 | LOC_Os07g30820 | VGPPASYGLFSSYQGPGMGPMPGG   | Y | 142  |
| 10334 | LOC_Os07g30980 | FLSGDEAFGYAQYVIKWEQIPIDKR  | Y | 1095 |
| 10335 | LOC_Os07g31460 | ANCFTFYCRSFGYEARLILDFTDHV  | Y | 340  |
| 10336 | LOC_Os07g32220 | LGTAGYAEDQRVYEAIEYGFDPYVW  | Y | 182  |
| 10337 | LOC_Os07g32400 | LSQCRCPYITDYYGSYLHQTKLWIV  | Y | 77   |
| 10338 | LOC_Os07g32530 | LGTVRVPGIGLLYNELARGVPGIFG  | Y | 622  |
| 10339 | LOC_Os07g36600 | ESAYAVRWAVANYLRPGDAVILLHV  | Y | 79   |
| 10340 | LOC_Os07g36940 | GSGPRRGAAPMDYGRGSAAALASP   | Y | 1456 |
| 10341 | LOC_Os07g37650 | FIQSMGNEKSNSYWEAELPPNYDRV  | Y | 95   |
| 10342 | LOC_Os07g37810 | HESGLLSDRSDVYSFGVVMLELLTG  | Y | 680  |
| 10343 | LOC_Os07g38090 | DVGWLWYGRSKAYEARTPLMVAATY  | Y | 67   |
| 10344 | LOC_Os07g38640 | AEVLGKGVSGSTYKAVLEDGIVVAV  | Y | 339  |
| 10345 | LOC_Os07g41110 | VVNEADKCVYYRYGGGEGVILCLYV  | Y | 1594 |
| 10346 | LOC_Os07g41810 | EALGPTHVLHSRYATKPDLAAYAAH  | Y | 113  |
| 10347 | LOC_Os07g42950 | SKDDDV RKYVNTYRRTFTTKNGKKV | Y | 162  |
| 10348 | LOC_Os07g43030 | DQNIKLVKEKLYCWLHKVHDEDK    | Y | 610  |
| 10349 | LOC_Os07g43240 | KVDIKTVRKMAEYMNKHFAITNKEE  | Y | 147  |
| 10350 | LOC_Os07g43800 | FLAAASSGFFYSYSSFLHSFARSLV  | Y | 45   |
| 10351 | LOC_Os07g44190 | SGHSPLKRPIAEYLRGVINLDKPS   | Y | 100  |
| 10352 | LOC_Os07g44710 | QFYDAFEDEDNVYIVMELCKGGELL  | Y | 219  |
| 10353 | LOC_Os07g44710 | TEADMWSIGVIAYILLGSRPFWAR   | Y | 336  |
| 10354 | LOC_Os07g45780 | WTNGNQHTTIRLYAAKVMAEFAKSL  | Y | 318  |
| 10355 | LOC_Os07g46750 | LKALEQHLSGKTYVSGNAISKDDIK  | Y | 26   |
| 10356 | LOC_Os07g47180 | KQPMTSRVVTLWYRPPELLLGATDY  | Y | 292  |

|       |                |                            |   |      |
|-------|----------------|----------------------------|---|------|
| 10357 | LOC_Os07g47350 | ADDNGEGGTFALYSLLCRHAKFSL   | Y | 129  |
| 10358 | LOC_Os07g47700 | GARFLLTSTSEVYGDPLQHPQVETY  | Y | 243  |
| 10359 | LOC_Os07g48310 | KHANLVPLRAYYYSKDEKLIVYDYL  | Y | 408  |
| 10360 | LOC_Os07g48410 | GADGLGWKPCLYYARGYCKNGSACR  | Y | 238  |
| 10361 | LOC_Os08g01420 | RQPPPPEDHLVITYKRRRSKETQPLP | Y | 25   |
| 10362 | LOC_Os08g01930 | AQQGAQQGGYAQYPQSQPAYGDQAA  | Y | 585  |
| 10363 | LOC_Os08g02470 | YFQAHRVTVVTSYPLGQILHNREGT  | Y | 1232 |
| 10364 | LOC_Os08g02690 | VKLAASDLKELGYDDFHRYFVKKLV  | Y | 166  |
| 10365 | LOC_Os08g03840 | WTTGDDQNKIILYDSEVEGRNRVLG  | Y | 354  |
| 10366 | LOC_Os08g03970 | AKTRYPQAQKMLYAILMASRKLRY   | Y | 1275 |
| 10367 | LOC_Os08g04840 | VPMPYYGYVPVFYAPPGAVQAQHEV  | Y | 300  |
| 10368 | LOC_Os08g07480 | ADGGGGRKVRGPYCRFCRSAEEVVR  | Y | 1217 |
| 10369 | LOC_Os08g07480 | IGVEEEEDIRCAYGIRHLFAGDEEK  | Y | 748  |
| 10371 | LOC_Os08g08830 | LKVRNESVINALYQDLPRQCKTCGL  | Y | 823  |
| 10372 | LOC_Os08g09160 | EGRRDGERRLLVYGDGSTPQALQA   | Y | 72   |
| 10374 | LOC_Os08g12140 | PPHQSNRGRDIEYAPGLIPNGGGPS  | Y | 441  |
| 10375 | LOC_Os08g14230 | SKFYTGDCYIFQYMPYGGDDKECLI  | Y | 428  |
| 10376 | LOC_Os08g14570 | VDLDEYAMEDEEYEERLKEKISLF   | Y | 157  |
| 10377 | LOC_Os08g16130 | EACLIGGSVRNAYHTKYLGYMKHD   | Y | 123  |
| 10378 | LOC_Os08g16930 | KSMSENPSQTFVYRVKNPALPPTLR  | Y | 101  |
| 10379 | LOC_Os08g20020 | DQPEANGVGKHQYHMDKENKGLDK   | Y | 252  |
| 10380 | LOC_Os08g20390 | EGRRDGERRLLVYGDGSTPQMLQA   | Y | 72   |
| 10381 | LOC_Os08g21760 | GGYYIVTYALGIYILNLLIAFLSPQ  | Y | 89   |
| 10382 | LOC_Os08g23360 | FRAERCFYLAKSYSSAGKRAESYAL  | Y | 466  |
| 10383 | LOC_Os08g25570 | GYTIRNVARCWCYETAVAVGVEPDN  | Y | 327  |
| 10384 | LOC_Os08g27420 | LQPIRDAETGRVYLPPACHTLSKDE  | Y | 313  |
| 10385 | LOC_Os08g27674 | SWQGYDISGYRFYTMFKDRKSAAQN  | Y | 825  |
| 10386 | LOC_Os08g28570 | ALENLPCLMTVQYLLYQYNKNDHEI  | Y | 827  |
| 10387 | LOC_Os08g29124 | HSGHLRADAVKQYLLSGESLYQRSS  | Y | 221  |
| 10388 | LOC_Os08g29490 | RAALVKFMVATHYAYLQMKMPGPAG  | Y | 667  |
| 10389 | LOC_Os08g29500 | VLRALQDLGFREYIEEVQAAYEHHK  | Y | 87   |
| 10390 | LOC_Os08g31350 | RWRQWKSMDMTNYVKKNKIPFEEWG  | Y | 229  |
| 10391 | LOC_Os08g31980 | INTDDDHVWVHDYHMLLPTFLRKR   | Y | 205  |
| 10392 | LOC_Os08g37280 | KKTAKHHVPVRLYGTCVHMYVDPWK  | Y | 72   |
| 10393 | LOC_Os08g38310 | DEDSSTSEASRKYMVGRLDLPTTT   | Y | 922  |
| 10395 | LOC_Os08g40800 | RPALVKFMAAVHYAYLQMKMPGGG   | Y | 719  |
| 10396 | LOC_Os08g41020 | KTEKGLLLTQERYAGDIKRTGMSN   | Y | 1172 |
| 10397 | LOC_Os08g42600 | HLSLLSRYYKRAYQELFLLNDAKPP  | Y | 171  |
| 10398 | LOC_Os08g42740 | GSDEVVSRREQRYIVLTEKDINERQ  | Y | 79   |
| 10399 | LOC_Os08g42980 | GGGGAYHHHQHYQPHHHQHQQHW    | Y | 70   |
| 10400 | LOC_Os08g42980 | PRRQHRGGGGAYHHHQHYQPHHH    | Y | 63   |
| 10401 | LOC_Os08g43110 | AAKLWCDNLGAKYLSANPIFHARTK  | Y | 1368 |
| 10402 | LOC_Os08g43560 | DKALLEDPSFRRYVDLYARDEDTF   | Y | 217  |

|       |                |                            |   |      |
|-------|----------------|----------------------------|---|------|
| 10403 | LOC_Os08g44870 | YLFGLPVGYLLGYFNLGVGGVWGG   | Y | 424  |
| 10404 | LOC_Os09g02480 | LLVITPKWSTCHYLNSRIDKNAYDW  | Y | 86   |
| 10405 | LOC_Os09g02700 | EMNSKMVGSKPLYVALAQRKEDRKA  | Y | 393  |
| 10406 | LOC_Os09g02810 | LFWYWEDCLKQRYEKFVIALEDALK  | Y | 292  |
| 10407 | LOC_Os09g03610 | LQSSYQSSQQAIIYQLQQQLQLMQQQ | Y | 553  |
| 10408 | LOC_Os09g06560 | FLLSLFLKISLPYLRHCGREIRCIF  | Y | 26   |
| 10409 | LOC_Os09g08390 | GSSNDSSDGVDCYSYDHPFHQELYN  | Y | 260  |
| 10410 | LOC_Os09g08390 | LQERTKRKIKVLYGSGRDELLKVM   | Y | 222  |
| 10411 | LOC_Os09g09900 | IYDTLWSRRDKEYIMCAYNQYAHWI  | Y | 334  |
| 10412 | LOC_Os09g12730 | GDKGSSSSMDDRYSQHADQRRFTER  | Y | 133  |
| 10413 | LOC_Os09g13700 | LRAARYQQSLRRYHQRHVRARSLCV  | Y | 1797 |
| 10414 | LOC_Os09g14670 | VEYFRLATPETEYGRMNIGSRPSKR  | Y | 755  |
| 10415 | LOC_Os09g15770 | KALARPASYYTKYFGCELGAQSKFD  | Y | 58   |
| 10416 | LOC_Os09g15790 | GQERYRAITSAYYRGAVGALVYDV   | Y | 82   |
| 10417 | LOC_Os09g16380 | LLDVLAGRKTSGYIEGNITISGYPK  | Y | 855  |
| 10418 | LOC_Os09g19560 | PKVDVIISEWMGYFLLFENMLNTVL  | Y | 182  |
| 10419 | LOC_Os09g19560 | YKEDKIEFWNNVYGFDMRCIKKQAM  | Y | 236  |
| 10420 | LOC_Os09g20460 | SSSGFSLHGGSMYGFQELGSGVGTSL | Y | 56   |
| 10421 | LOC_Os09g23350 | VTAVRDGMNLIPYEYVIARQGNEKL  | Y | 471  |
| 10422 | LOC_Os09g23570 | AEVLGKGWLGTTYRATLEGGAHVVA  | Y | 375  |
| 10425 | LOC_Os09g32020 | SSVALCEKLQLWYALAKISAEKAAW  | Y | 417  |
| 10426 | LOC_Os09g33600 | LAYAQQSRERSNYEQAALVERMQEF  | Y | 232  |
| 10427 | LOC_Os09g33960 | AKVDDEISPETSQAPNVVETVTDI   | Y | 188  |
| 10428 | LOC_Os09g36030 | QMGPLDLSASMGYLWDPGNRKVRAR  | Y | 240  |
| 10429 | LOC_Os09g36160 | FQLWQQEQQPFYASNIIRFADDAP   | Y | 52   |
| 10430 | LOC_Os09g37006 | DGGWEDDHAPPAYAGNGYTRGRGRG  | Y | 190  |
| 10431 | LOC_Os09g37040 | SCFMIYVSAQKAYIEALDGWLSKFI  | Y | 505  |
| 10432 | LOC_Os09g37520 | RSELLALAIRHRYALADTHRAYAES  | Y | 32   |
| 10433 | LOC_Os09g38200 | SATKDLENLATDYFNDMFTADPTVD  | Y | 828  |
| 10434 | LOC_Os09g39462 | AKVAIKQRPQKHYHNNSSGAHSSR   | Y | 181  |
| 10435 | LOC_Os09g39900 | CDLLCFLDAYSGYHQIRMAREDEEK  | Y | 906  |
| 10436 | LOC_Os10g04580 | FVELWDVSGHERYKECRSLFYSQLIN | Y | 105  |
| 10437 | LOC_Os10g08570 | SEQKALTKVKTVYLEHFPRSWDERN  | Y | 345  |
| 10438 | LOC_Os10g15170 | PTRLKEVQKLTGYMAALSRFVARMG  | Y | 195  |
| 10439 | LOC_Os10g20040 | VTLTSPSGDVLRYLVRLDFRATNNM  | Y | 1311 |
| 10440 | LOC_Os10g21000 | LRIGSISHQLSAYSLSGYGLNDAFD  | Y | 306  |
| 10441 | LOC_Os10g21920 | RTTVSFNTLIAAYCRDGVDAQPALQ  | Y | 260  |
| 10442 | LOC_Os10g22950 | LEEDFMHIVLVHYLETKGGKSRTRG  | Y | 135  |
| 10443 | LOC_Os10g25090 | SQNNLGGGQNIQYNLPNKKLERLNL  | Y | 117  |
| 10444 | LOC_Os10g25220 | QLEKLKVEECKAYLRMHKLRLSGNK  | Y | 143  |
| 10445 | LOC_Os10g25220 | SSKQTPTEQLLHYLPQFPHPPQHNE  | Y | 385  |
| 10446 | LOC_Os10g25320 | EGLSVTAESDDEYDSGNDHPTLSA   | Y | 109  |
| 10447 | LOC_Os10g26140 | LQLDRVSMTLNLYRFYRDAVVQOGT  | Y | 241  |

|       |                |                             |   |      |
|-------|----------------|-----------------------------|---|------|
| 10448 | LOC_Os10g29400 | VKKQWKILKGIPYNPYKNVQSDIIL   | Y | 702  |
| 10449 | LOC_Os10g31520 | AFVPPKEDTATPYESA KSTSNDEI   | Y | 336  |
| 10450 | LOC_Os10g31770 | RYFVLETRLLSYYKRKPQH KMPKLP  | Y | 42   |
| 10451 | LOC_Os10g32710 | DSDDMEDDGERYNRIPLSNEVVL R   | Y | 163  |
| 10452 | LOC_Os10g33230 | GAGYGSNGGSGYPNAWADPSQGGG    | Y | 424  |
| 10453 | LOC_Os10g35150 | MSVAWYPIYHIPYQRNVKDL SACFL  | Y | 216  |
| 10454 | LOC_Os10g35450 | RFSKENVIGEGGYGVVYRGR LINGT  | Y | 200  |
| 10455 | LOC_Os10g37740 | PTREEIRCMNP NYSEFKFPQ IKAHP | Y | 372  |
| 10457 | LOC_Os10g39200 | SFNSKVSPSEVG YVQSREFSSELPE  | Y | 329  |
| 10458 | LOC_Os10g41400 | TPNRQGN DVG TQYRSGIYYTPEQE  | Y | 188  |
| 10459 | LOC_Os11g02080 | GLWATAVGASVAYGR RKT PQMRLIH | Y | 34   |
| 10460 | LOC_Os11g03810 | VGGTTYFTHVVIYRDDGP AVWWVSL  | Y | 164  |
| 10461 | LOC_Os11g04070 | TIAAAPHMFLNGYKNVLAVAVETEY   | Y | 248  |
| 10462 | LOC_Os11g04670 | HESGIHQDGM LKYKGTYE IISPDDI | Y | 404  |
| 10463 | LOC_Os11g06320 | QKVL SYSKYDLGYFHGLK LTRTSSK | Y | 444  |
| 10464 | LOC_Os11g07280 | IMVSILQLGQSSYLPHPIDNDSYDR   | Y | 608  |
| 10465 | LOC_Os11g07500 | MSEMIRPERALLYLVPGR LVKVRDG  | Y | 608  |
| 10466 | LOC_Os11g10040 | SLVYSEKKFVARYIDPYKQAAPTLA   | Y | 363  |
| 10467 | LOC_Os11g10070 | CANGMSLKYVKNYKRKA FWIYGCMV  | Y | 527  |
| 10468 | LOC_Os11g10480 | IYHFVGTSTFSEYTMHVGC VAKIN   | Y | 152  |
| 10469 | LOC_Os11g10710 | GFSEERKLKG GGYGT VYKGEHKNGD | Y | 29   |
| 10470 | LOC_Os11g11390 | EALEAARIACNKYMTKNAGKDAFHL   | Y | 75   |
| 10471 | LOC_Os11g12810 | LGRMPRAEIQGT YKIARRIEAEETG  | Y | 416  |
| 10472 | LOC_Os11g15170 | QYSWGS AVLAATYAGLC DACVRNSK | Y | 1015 |
| 10473 | LOC_Os11g17890 | STWSQMEHEFH DYFKDASLMEQRPI  | Y | 524  |
| 10474 | LOC_Os11g19060 | VVSSHFTNGVGN YGSQHYGYNGWSP  | Y | 387  |
| 10475 | LOC_Os11g23020 | LTFTVLATEGLAYKPTPETRVHGAQ   | Y | 410  |
| 10476 | LOC_Os11g23020 | QEETKGKEVKKKYVAPQEFQLGMPL   | Y | 592  |
| 10477 | LOC_Os11g23750 | IFYFHAPMMGLYIVNL DGCSVYNI   | Y | 297  |
| 10478 | LOC_Os11g23960 | GCVLMQDRKVVAYASRQLCPHENNY   | Y | 1177 |
| 10479 | LOC_Os11g27820 | SKTRY PQVQKLLYGH SVTVVTSFLL | Y | 49   |
| 10480 | LOC_Os11g29970 | FTPKEVRYENLQYQYMQPKYPIVP    | Y | 746  |
| 10482 | LOC_Os11g31000 | FRAAGEMLLSLPYLLPGQPGRSGSS   | Y | 27   |
| 10483 | LOC_Os11g32470 | VMFLPLPMISGYAARFFT KKSLS    | Y | 438  |
| 10484 | LOC_Os11g32970 | EEVKKEIFQALGYTEDHCAMNIQAR   | Y | 50   |
| 10485 | LOC_Os11g32970 | KLEKVFQCKDGGYRWGIMTSNGSES   | Y | 225  |
| 10486 | LOC_Os11g35274 | QVTHKNIVKVIGYCIGK KSLMMVTE  | Y | 86   |
| 10487 | LOC_Os11g35510 | PTLAWMRQLEESYTTSPAVAHAGLW   | Y | 14   |
| 10488 | LOC_Os11g35850 | PTNMENMSLEKLYLDCNHIADRIPR   | Y | 534  |
| 10489 | LOC_Os11g36480 | DFSDICPKEVSCYNCAQPGHTGLGC   | Y | 43   |
| 10490 | LOC_Os11g37660 | ALAVVAGLASNGYVASLLVSRYFRL   | Y | 50   |
| 10491 | LOC_Os11g37700 | ELIKELSTPPPGYQDLSFPTKYSQN   | Y | 1164 |
| 10492 | LOC_Os11g38130 | PYHPQRLRLFLYYRVTLSCSPSAGS   | Y | 176  |

|       |                |                            |   |     |
|-------|----------------|----------------------------|---|-----|
| 10493 | LOC_Os11g39190 | CPGVDLIDNQUIQYHWSYYRDVVISL | Y | 83  |
| 10494 | LOC_Os11g39660 | WDSMIDKVKKI IYRHEGKELDEQCS | Y | 500 |
| 10495 | LOC_Os11g40140 | GSEGADSSLQEQYNKELTLQEAETI  | Y | 183 |
| 10496 | LOC_Os11g43970 | AQQSSLSQRGPSYGYRGRVMLAFEE  | Y | 577 |
| 10497 | LOC_Os11g47330 | IVEPFVPHDQEYYLSIVSERLGSTI  | Y | 118 |
| 10498 | LOC_Os11g48090 | QISALIDRQEELYERESQLKAMLEV  | Y | 36  |
| 10499 | LOC_Os12g01190 | SQQAPTNNISISVYITYAKEEEAIRC | Y | 170 |
| 10500 | LOC_Os12g01200 | TTVRSFPADNRKYCYTMNVRNTRY   | Y | 81  |
| 10501 | LOC_Os12g01940 | DDSNAEDNPLYDYPEELSEDEDDDS  | Y | 288 |
| 10502 | LOC_Os12g02540 | LPDYARIVDDGLYRAIDIYKHAHPS  | Y | 428 |
| 10503 | LOC_Os12g03880 | RPFSYGLVITNVYDSGSVFSPEVLD  | Y | 196 |
| 10504 | LOC_Os12g04000 | SSLLGVIWSLVSYRWGIEMPAIIAR  | Y | 261 |
| 10505 | LOC_Os12g04050 | EEKTAFITPIGTICYTTPFGLKNA   | Y | 831 |
| 10506 | LOC_Os12g04890 | EYKENEVIQGAIIYSRAEDMKEAVKH | Y | 110 |
| 10507 | LOC_Os12g06360 | LRRYRLMLNPEKYTFGVPSGKLLGF  | Y | 148 |
| 10508 | LOC_Os12g06670 | DQGGNMTAETGTYRWMAPEVINHQP  | Y | 419 |
| 10509 | LOC_Os12g06810 | NRFPKENTKCGFYLHPAEGSPAPNI  | Y | 633 |
| 10510 | LOC_Os12g07190 | LASETGDGKSSIYPPVIGNSFAFKL  | Y | 402 |
| 10511 | LOC_Os12g12370 | LYSDNEMNIKYRYKDEELSFIPSL   | Y | 227 |
| 10512 | LOC_Os12g12480 | GMFLGYPAHSRGYRVLVLKTNKIVE  | Y | 210 |
| 10513 | LOC_Os12g13340 | ASFTDDEEEEAPYPYRSDGNLRAGS  | Y | 209 |
| 10514 | LOC_Os12g13770 | KPKLTFEMLMAKYNKGSAGQRLDNQ  | Y | 449 |
| 10515 | LOC_Os12g13770 | LYGVEVNLGSLRYFKQDDLTVEDYK  | Y | 629 |
| 10516 | LOC_Os12g14920 | GRGLASISTRREYSLSPWQQRGGGD  | Y | 229 |
| 10517 | LOC_Os12g15420 | LECCSQERTYLRYYGLLGQRFCMIN  | Y | 595 |
| 10518 | LOC_Os12g16430 | VAKGFKQRYGIDYEDTFSPVKAAT   | Y | 863 |
| 10519 | LOC_Os12g18110 | VQSIDQHTLVNFYGNIGKTLLSLEV  | Y | 216 |
| 10520 | LOC_Os12g19290 | DYIAPEVLLKKGYGMECDLWSLGAI  | Y | 342 |
| 10521 | LOC_Os12g21700 | AVAAARMNGEYPYRVGQPECQYYLK  | Y | 110 |
| 10522 | LOC_Os12g21710 | GVWNGDRRLASRYGEAFEVLKKRTS  | Y | 302 |
| 10523 | LOC_Os12g21798 | IEAHVDVKTTDNYMLRFLCIGFTKR  | Y | 133 |
| 10524 | LOC_Os12g21940 | SLSRRWSGTLGQYNMLDACTARPPL  | Y | 418 |
| 10525 | LOC_Os12g22000 | KKQFPLGKYLLGYLYQTLSTAVTKI  | Y | 133 |
| 10526 | LOC_Os12g24080 | SLLAHDGLSDNAYLLVAEVLKKIVA  | Y | 370 |
| 10527 | LOC_Os12g24580 | SSMEKQTYAQNKYGGITPKKPLISK  | Y | 23  |
| 10528 | LOC_Os12g25690 | ANYWKQVIKINDYQKSRLFVNRVSS  | Y | 305 |
| 10529 | LOC_Os12g28640 | NGIVLQGIKTRVYDRLMSHDKKWVE  | Y | 340 |
| 10530 | LOC_Os12g29660 | VINFSCPRDARTYLHRVGR TARAGR | Y | 523 |
| 10531 | LOC_Os12g31040 | LLEQGTSIQVFSYVETTETLRR AIS | Y | 413 |
| 10532 | LOC_Os12g32410 | VWTQIGEIVFPVYTTVPILAGPSMA  | Y | 78  |
| 10533 | LOC_Os12g32710 | IAPRVMEMLRLSYEDLTSEVQLCFQ  | Y | 441 |
| 10534 | LOC_Os12g34510 | AGLQFPVGRIARYLKAGKYAERVGA  | Y | 37  |
| 10535 | LOC_Os12g35030 | RKYKLEGYTTCKYLN NVWDNEANAA | Y | 211 |

|       |                |                            |   |      |
|-------|----------------|----------------------------|---|------|
| 10536 | LOC_Os12g35100 | RFPDMNGYVDECYSVQRLRQTYAGI  | Y | 783  |
| 10537 | LOC_Os12g35290 | YHRTHLFDVVNQYRAIFNNDKSGSD  | Y | 282  |
| 10538 | LOC_Os12g36180 | FENIFPKSQSARYSDVHVDIGASGS  | Y | 333  |
| 10539 | LOC_Os12g36730 | PAGTSLQEIGESYFSELINRSLIQP  | Y | 381  |
| 10540 | LOC_Os12g37840 | TVIRDMPNVPLLYIIIGAFIPATMIA | Y | 293  |
| 10541 | LOC_Os12g37860 | YHRGGGTNRGRGYDVGKPSHVTNAE  | Y | 1389 |
| 10542 | LOC_Os12g38000 | RTEKPMLKAGNAYHKYRVKRCWPK   | Y | 186  |
| 10543 | LOC_Os12g38430 | VPFERFGPVRDVYLPKDYYSGEPRG  | Y | 67   |
| 10544 | LOC_Os12g39090 | IAKKLGAERSEHYFHSLLKKFLGGQL | Y | 34   |
| 10545 | LOC_Os12g39370 | DEHGLVKPRYGRYYDEGLEKTRQTL  | Y | 120  |
| 10546 | LOC_Os12g41290 | KTAPGYCEKAGVYVSHLSQTSRAV   | Y | 128  |
| 10547 | LOC_Os12g41956 | TVVGTARAARAERYVEALERRGEGNG | Y | 198  |
| 10548 | LOC_Os12g42840 | SSREMVDDDDALYPYVCGLSGSTEI  | Y | 152  |
| 10550 | LOC_Os12g44140 | ATKLQVRHLSRYFKQSAKTMEQQF   | Y | 139  |
| 10551 | LOC_Osm1g00400 | AENRKRAISPFPYKSSLYRNSTYCS  | Y | 277  |
| 10552 | LOC_Osp1g00740 | VMILNLMPYRASYPILKLVSAAAN   | Y | 80   |

**Table S4. Selected positive dataset.**

| No. | Protein Name     | Sequence                   | Amino acid | Position |
|-----|------------------|----------------------------|------------|----------|
| 1   | LOC Os01g01150.1 | QHKKSKSEEGSKSRKDDCLLDDTLS  | S          | 863      |
| 4   | LOC Os01g01150.1 | PSSPAQASRDAYSADDDDDDDRPHA  | S          | 67       |
| 11  | LOC Os01g01150.1 | SRSPIKYRRSRRSRSYSPVVRHTRG  | S          | 541      |
| 14  | LOC Os01g01510.1 | LSMQDFGLEDGESDEEDRAIKASNH  | S          | 173      |
| 17  | LOC Os01g01510.1 | ARRIQKEEESKLSMQDFGLEDGESD  | S          | 162      |
| 19  | LOC Os01g01510.1 | PTVKPPVMAASASDDDEIDAFHKHR  | S          | 26       |
| 24  | LOC Os01g01880.1 | SSLKRKPTVICLSIERILVFFLFSR  | S          | 139      |
| 26  | LOC Os01g01960.1 | DMDHDDQDAKAESEGEAEGTTETHD  | S          | 987      |
| 27  | LOC Os01g02700.1 | RRSAALQAMAAFSVLALVVPDQVQG  | S          | 18       |
| 28  | LOC Os01g03500.1 | AKENANLIDADDSDELRSICSESD   | S          | 131      |
| 33  | LOC Os01g03650.1 | AARASSAAVPAVSDDLVLRIAEQLE  | S          | 51       |
| 35  | LOC Os01g03760.1 | ATASAYSDDDDSDAEAQATRPEGEV  | S          | 108      |
| 36  | LOC Os01g03820.1 | KPLIGAARIVINSIHKGDLLLLPI   | S          | 201      |
| 37  | LOC Os01g04100.1 | NRAGDAIAAARRSPEQLDGVKERLL  | S          | 70       |
| 40  | LOC Os01g04330.1 | FTRFDADGDGRISPELAAVTRAIA   | S          | 44       |
| 42  | LOC Os01g04650.1 | RLFLFPAKPESSSLGSLDDSSKS    | S          | 171      |
| 43  | LOC Os01g04650.1 | ISGSLDGIPRGISTDSASVNCLLGL  | S          | 207      |
| 44  | LOC Os01g04650.1 | DGIPRGISTDSASVNCLLGLEDDSS  | S          | 212      |
| 45  | LOC Os01g04650.1 | SLDGIPRGISTDSASVNCLLGLEDD  | S          | 210      |
| 47  | LOC Os01g04650.1 | SVPDSPMIDKNSSFSTSSAPSLSN   | S          | 276      |
| 50  | LOC Os01g04650.1 | RGGDSWDEPFSSAAAAAAAAGGGR   | S          | 43       |
| 51  | LOC Os01g04650.1 | STESSPRSRGGDSWDEPFSSAAAA   | S          | 35       |
| 52  | LOC Os01g04650.1 | SISPSDASSRVFSDDDKSDHGGGGG  | S          | 360      |
| 56  | LOC Os01g05010.1 | RIIDAEIKFAEESDDHDRVVEEIPDN | S          | 81       |
| 59  | LOC Os01g05420.1 | EDDLGDDWNRGRSPTPVHGGDAGS   | S          | 47       |
| 60  | LOC Os01g05420.1 | DDTGVDPADRYGSDNDGHSPRHYPQ  | S          | 223      |
| 61  | LOC Os01g05420.1 | PADRYGSDNDGHSPRHYPQAEEGEE  | S          | 229      |
| 63  | LOC Os01g06270.1 | STPKAETVVSPKSPAKPDQPLDLS   | S          | 488      |
| 64  | LOC Os01g06270.1 | QVPSTPKAETVVSPKSPAKPDQPLD  | S          | 485      |
| 67  | LOC Os01g07110.1 | SPMFQTGSGKMVSLSKGSIQKARAV  | S          | 178      |
| 74  | LOC Os01g08260.1 | GITNATSVQPVISIERFVSYRERAA  | S          | 413      |
| 77  | LOC Os01g08420.1 | NGAVATRLSSNKSISVPAGFDQRTV  | S          | 711      |
| 78  | LOC Os01g08430.1 | RNKDGHLEHSVNSGEVAVIRQPRGV  | S          | 114      |
| 81  | LOC Os01g08970.1 | LERIKNQAGDEESDEEDEDVADKD   | S          | 480      |
| 82  | LOC Os01g09280.1 | VKQKEPEFARHLSDLQLRKHEESEF  | S          | 221      |
| 84  | LOC Os01g09550.1 | QRRRDSGSGSCSSTRDHEVSATSYS  | S          | 302      |
| 87  | LOC Os01g09620.1 | AAIRRGSWPGVGSPVNDVLASFRQL  | S          | 258      |
| 88  | LOC Os01g09620.1 | GWSYPSSSAVYGSPKAATGLYSLPT  | S          | 294      |
| 90  | LOC Os01g09620.1 | ASFRQLRLNKVKSSPSGGWSYPSSS  | S          | 277      |
| 92  | LOC Os01g09850.1 | RCDCGTLFSRRDSFITHRAFCDALA  | S          | 191      |
| 96  | LOC Os01g10690.1 | AQICAKEEANADSSDDEQAVHYKRG  | S          | 295      |

|     |                  |                            |   |     |
|-----|------------------|----------------------------|---|-----|
| 100 | LOC Os01g10820.1 | RASKVLEQLSGQSPVFSKARYTVRS  | S | 46  |
| 103 | LOC Os01g11040.1 | MDKAEHVQSKCISPEQQEIDHREME  | S | 388 |
| 104 | LOC Os01g11040.1 | SNTPLHTRLNGTSADDLGDDLKQSS  | S | 330 |
| 106 | LOC Os01g11330.1 | AGVTIKRAKQNCAPKKRTMGAVLG   | S | 556 |
| 108 | LOC Os01g11580.1 | TADDNERYVGS SSPVHLEDQKGENA | S | 302 |
| 109 | LOC Os01g11580.1 | EIDNSKVLERSDSTVHAAGMEATPK  | S | 126 |
| 110 | LOC Os01g11920.1 | ANYGHGSIVRSRSGGVVVAEEDAVV  | S | 179 |
| 114 | LOC Os01g12390.1 | ALAFDLEDLLRASAEVLGKGAFGTA  | S | 341 |
| 116 | LOC Os01g12480.1 | YRKPAAEKSDDTSDDDEEPDIDIGK  | S | 68  |
| 117 | LOC Os01g12650.1 | ADKLHIGGDGSSSDSDADERKQPKP  | S | 34  |
| 120 | LOC Os01g12650.1 | IADKLHIGGDGSSSDSDADERKQPK  | S | 33  |
| 122 | LOC Os01g12660.1 | SSFPKLKRNASSTSDMSSLASQGP   | S | 218 |
| 125 | LOC Os01g12660.1 | GSSTDSSFKRISSETTLEKVSGLLG  | S | 161 |
| 126 | LOC Os01g12660.1 | GGGSTDSSFKRISSETTLEKVSGL   | S | 159 |
| 127 | LOC Os01g12780.1 | QMAAVDDGKL RASSRSSTQPPRRR  | S | 111 |
| 128 | LOC Os01g12780.1 | MAAVDDGKL RASSRSSTQPPRRRR  | S | 112 |
| 129 | LOC Os01g12880.1 | FNGQSPAGRNMRSPDQQDEAESSAG  | S | 160 |
| 131 | LOC Os01g13270.1 | LVMEYCSGGNLHSLRQRQLNKHFE   | S | 226 |
| 132 | LOC Os01g13470.1 | KADDSSVAKDTNSEPEAQLELEKGM  | S | 187 |
| 133 | LOC Os01g13530.1 | IISTQTKETRAGSPIPNSNPLARSA  | S | 242 |
| 135 | LOC Os01g14050.1 | EKNAGEPGRSLTSILSRKISRKKPE  | S | 603 |
| 136 | LOC Os01g14050.1 | AGEPGRSLTSILSRKISRKKPEDKL  | S | 606 |
| 138 | LOC Os01g14514.1 | TATRRLPSPRGGSVHARCSPFRNLV  | S | 113 |
| 144 | LOC Os01g15020.1 | SPIMNGGDPASRSIDIKPRISEERP  | S | 723 |
| 148 | LOC Os01g15039.1 | VAQDGSGRWRTVSEAVARAPSHSRR  | S | 319 |
| 150 | LOC Os01g15460.1 | ISTKDQSVNQVTSPVAASEPVGSIL  | S | 435 |
| 151 | LOC Os01g15600.1 | DDVGAGFIAGHGSQSASGPEVDVER  | S | 203 |
| 152 | LOC Os01g15600.1 | AGFIAGHGSQSASGPEVDVERLVDL  | S | 207 |
| 153 | LOC Os01g15630.1 | PTDADSMRKARRSPGYQLYRQVSDS  | S | 179 |
| 156 | LOC Os01g16100.1 | QSHSHPAKTLRASPPPPSTAGSAPK  | S | 50  |
| 159 | LOC Os01g16110.1 | TNNRSHYGGVSESPPSNSIGYFYGS  | S | 695 |
| 160 | LOC Os01g16110.1 | LSSSVTSLNKGLSNISIDNKPKSIS  | S | 476 |
| 162 | LOC Os01g16110.1 | YWAFHHFRNQDSSPIIKHPELERLL  | S | 876 |
| 169 | LOC Os01g16330.1 | SSRPSRSLVGNMSSRTSRAVQNNQP  | S | 229 |
| 172 | LOC Os01g16390.1 | LRYLEPPAAASSSGEYAPRCYDDL   | S | 154 |
| 173 | LOC Os01g16390.1 | RYKLEPPAAASSSGEYAPRCYDDL   | S | 155 |
| 174 | LOC Os01g16850.1 | GREKISCRGFHSSFRPTDGLSLNV   | S | 55  |
| 176 | LOC Os01g16870.1 | SQFIKFDEMSETSSSHGGHTSAGSA  | S | 873 |
| 179 | LOC Os01g16870.1 | MSETSSSHGGHTSAGSAPVPELPRL  | S | 881 |
| 184 | LOC Os01g18890.1 | AHSFGRSHCSAFSFRLYPQVAPDMD  | S | 115 |
| 188 | LOC Os01g19894.1 | AFVQKREFRVKVSNRRTTYDVKCIQG | S | 845 |
| 189 | LOC Os01g20940.1 | PICSKNVGLSTSSLKLHLQKAHKRL  | S | 870 |
| 190 | LOC Os01g20940.1 | SSAGSRGSSDSVSPLSRESWSNKYF  | S | 590 |

|     |                  |                            |   |     |
|-----|------------------|----------------------------|---|-----|
| 193 | LOC Os01g21590.1 | GHHKRRRGDDVSSAGAGDDDDDEDGV | S | 380 |
| 195 | LOC Os01g21590.1 | DEDGVKRARGAASAAGGGDDEGPSA  | S | 400 |
| 196 | LOC Os01g21960.1 | SFRYMDKDLGFQSADEGGSGTFRHN  | S | 143 |
| 197 | LOC Os01g21960.1 | KDLGFQSADEGGSGTFRHNSAHAIT  | S | 149 |
| 198 | LOC Os01g23530.1 | TVPTVVPARPPNSEGERKSTNFHPS  | S | 21  |
| 199 | LOC Os01g23540.1 | GNAKLAVQCDKRSLDMVEHTPSPPA  | S | 763 |
| 203 | LOC Os01g23590.1 | EDYFNEDSDEEDSVRRTKHAQKQDG  | S | 705 |
| 205 | LOC Os01g23640.1 | EEELSQLSIKQSPPPVLAELERRP   | S | 307 |
| 212 | LOC Os01g25610.1 | DEDAKFKLCKVRSVQFGQKIPYLN   | S | 128 |
| 213 | LOC Os01g26940.1 | PGKHETNRRRASSRELSPHGRQNSP  | S | 344 |
| 215 | LOC Os01g26940.1 | RSPRTHSPKELDSPRPENEVGKLAT  | S | 307 |
| 217 | LOC Os01g26940.1 | SSHRHHSRRPWSPPANRKTGLGKP   | S | 603 |
| 219 | LOC Os01g27790.1 | RSGRRDRRRKKGSARFDDEGHVLAV  | S | 440 |
| 220 | LOC Os01g27790.1 | DDEGHVLAVEGASRAPRKGRPASDK  | S | 456 |
| 223 | LOC Os01g31580.1 | LDFSHATLQRSSSTPNIPMPDKAA   | S | 115 |
| 224 | LOC Os01g31629.1 | SSKSITVEGQRKSLEETQQLLDQRK  | S | 120 |
| 226 | LOC Os01g32130.1 | LLGEGRLKMLNSDGELEEEQETHA   | S | 195 |
| 229 | LOC Os01g32870.1 | TMVNSVGAGSSSSRYPTESPENGI   | S | 368 |
| 240 | LOC Os01g34330.1 | RRGRKPKRPAEESEEEEEEEEAKE   | S | 113 |
| 242 | LOC Os01g34410.1 | LHPGAQQPVNIDSGDEEAPNVRTEK  | S | 139 |
| 244 | LOC Os01g34780.1 | KDEMDIDAVDADSHGSKDKKREKDK  | S | 350 |
| 247 | LOC Os01g35050.1 | NTPVPSKYNGSESPSLAEIVNDQRL  | S | 756 |
| 250 | LOC Os01g35050.1 | RRNTPVPSKYNGSESPSLAEIVNDQ  | S | 754 |
| 251 | LOC Os01g36790.1 | KKKIFRNKKRSKSFIDYGDGVPVR   | S | 308 |
| 253 | LOC Os01g36860.1 | SRSPGASRRHERSATGSGSALPDGSG | S | 656 |
| 254 | LOC Os01g36860.1 | GASRRHERSATGSGSALPDGSGHGER | S | 660 |
| 255 | LOC Os01g36860.1 | KAAEVSKNPDSSPPHHGKTREDEE   | S | 754 |
| 260 | LOC Os01g36940.1 | KKHQQRQRPLSPGCCGCARCGCR    | S | 47  |
| 266 | LOC Os01g37825.1 | DFPVPSHVEPRFSCFVESEAAGSAV  | S | 294 |
| 268 | LOC Os01g37825.1 | RFSCFVESEAAGSAVVVSCKMPADR  | S | 304 |
| 269 | LOC Os01g37832.1 | KSISVVGADGTSPSRMRAFINREG   | S | 92  |
| 273 | LOC Os01g40050.1 | NEDHQLTKSRKFSMKKKGIGSEASA  | S | 358 |
| 274 | LOC Os01g40050.1 | AHRKDKELPVHRSDDDNDDNEDHQ   | S | 338 |
| 278 | LOC Os01g40340.1 | GRPTSLHDRGRDSDDDDFRDRDYDV  | S | 404 |
| 286 | LOC Os01g41430.1 | SKDFAARGAAELSPDADGCLRWLDA  | S | 271 |
| 287 | LOC Os01g41550.1 | PSQISRRFGRSFSYCLVDRTSSAS   | S | 295 |
| 288 | LOC Os01g41610.1 | ELSKQLFYTRLASLPGRYEAFWKEF  | S | 61  |
| 294 | LOC Os01g42250.1 | ARIPTEHIDLKSPERHEAREKVVV   | S | 154 |
| 296 | LOC Os01g42380.1 | ASMRLGGSMRGDSGSMWRRGDDVFS  | S | 23  |
| 297 | LOC Os01g42380.1 | EIQKVASMRLGGSMRGDSGSMWRRG  | S | 18  |
| 304 | LOC Os01g42830.1 | KSAFFEQGLNKLSENEKANSKEAPV  | S | 199 |
| 312 | LOC Os01g43170.1 | RDYTNPYLPVAPSAIDGSGPDGKKQ  | S | 220 |
| 316 | LOC Os01g43330.1 | PLEDTRNASDAASLSEISEEKKTEE  | S | 575 |

|     |                  |                            |   |      |
|-----|------------------|----------------------------|---|------|
| 319 | LOC Os01g43330.1 | QVEPSDARVSPCSPVLEDKLVDPCLC | S | 394  |
| 322 | LOC Os01g43330.1 | VDPLCSQEKNSEDLGMANISDVN    | S | 414  |
| 324 | LOC Os01g43420.1 | DQPGVRHLSSFSFDNPRGRQIQKA   | S | 268  |
| 328 | LOC Os01g44310.1 | ETTSQDFVGCCKSWDGGDIAELRME  | S | 620  |
| 329 | LOC Os01g45550.1 | EAALPDGLTKMGSSSTAELHPKVVD  | S | 421  |
| 330 | LOC Os01g45550.1 | VALGGGGGGENFSFGGKTVDGAEA   | S | 393  |
| 331 | LOC Os01g46070.1 | NGVEEVVLGLGQLSDFEKEGLENLKG | S | 313  |
| 332 | LOC Os01g46710.1 | IVEPDQGMEEVASPTIKEPDEDIEV  | S | 1157 |
| 335 | LOC Os01g46710.1 | RSSSHRSHRRGGSVERSESEGEAG   | S | 20   |
| 336 | LOC Os01g46710.1 | HRSHRRGGSVERSESEGEAGGGAG   | S | 24   |
| 337 | LOC Os01g46710.1 | SHRRGGSVERSESEGEAGGGAGAR   | S | 26   |
| 341 | LOC Os01g46840.1 | IATVHPLSIRNLSPPELRNLNKGKG  | S | 527  |
| 342 | LOC Os01g46980.1 | LVDHDVYLPPSPSSHDSHERFCSSG  | S | 177  |
| 345 | LOC Os01g48180.1 | MLSNAKAATVEESPRSSGADEWGLE  | S | 1464 |
| 347 | LOC Os01g48180.1 | EKIRAFQNVISDSEAEKEANDAERD  | S | 653  |
| 348 | LOC Os01g48180.1 | FERTAPSTYCVKSPYRKDPADSEVV  | S | 623  |
| 351 | LOC Os01g48280.1 | PRRIKETQRLLEPAPGISASPSE    | S | 19   |
| 353 | LOC Os01g48320.1 | PMMRRRLESRSRSPSPSPTPAVAL   | S | 145  |
| 354 | LOC Os01g48320.1 | MRRRLESRSRSPSPSPTPAVALPL   | S | 147  |
| 360 | LOC Os01g48330.1 | NGSTQKAMSLPSSPHEYRAQISETI  | S | 491  |
| 362 | LOC Os01g48720.1 | PYIMEDASNANDSPRSSISGAKRKH  | S | 226  |
| 364 | LOC Os01g49190.1 | NSEVSALLGRIPSAVGYQPTLATDL  | S | 355  |
| 365 | LOC Os01g49200.1 | GLDIAGLPIKKLSFNASTLRETETP  | S | 576  |
| 370 | LOC Os01g49350.1 | VEDTGKYQAAPQSPSSPAGSAVMHA  | S | 247  |
| 372 | LOC Os01g49350.1 | DTGKYQAAPQSPSSPAGSAVMHAAT  | S | 249  |
| 375 | LOC Os01g49529.1 | LLKYSGGGTPRSMGGDMESGSVKD   | S | 353  |
| 376 | LOC Os01g49529.1 | GGKDKKGPDPPLSPDTHAQWDSRQ   | S | 682  |
| 378 | LOC Os01g49640.1 | NPDLRKYINSQNSRKVAAACSVAP   | S | 89   |
| 383 | LOC Os01g50310.1 | AKSYAAVVAEKTSPNGSVAEDEVTV  | S | 83   |
| 389 | LOC Os01g51010.1 | GTTTKTAKSYFSDSDSEDELAQRKE  | S | 947  |
| 390 | LOC Os01g51010.1 | TKTAKSYFSDSDSEDELAQRKEVQT  | S | 950  |
| 392 | LOC Os01g51010.1 | REEFNHSRERKSSVSGSNWNIEFKD  | S | 338  |
| 394 | LOC Os01g51020.1 | FSKEPNLYNVHSYKHSLANKKTV    | S | 45   |
| 396 | LOC Os01g51200.1 | TSEPSRTRATDASPGAFRRRTSGPQK | S | 416  |
| 398 | LOC Os01g51300.1 | AEHISQFNEEARSPFVKKYKTIHP   | S | 98   |
| 399 | LOC Os01g51390.1 | PLTNLPELSWFRSHTYSDDFSSRT   | S | 485  |
| 402 | LOC Os01g51640.1 | EEVPTVESEENESPQSKHCTSVEVI  | S | 335  |
| 404 | LOC Os01g51890.1 | PFISEKALRSCLSFKSAHGDSNAFP  | S | 379  |
| 406 | LOC Os01g52390.1 | NAERDERAKKSVSINEFLKPAEGER  | S | 318  |
| 409 | LOC Os01g53000.1 | GTLAELDEERAGSVTSDVPSSLASD  | S | 65   |
| 411 | LOC Os01g53000.1 | AELDEERAGSVTSDVPSSLASDRLI  | S | 68   |
| 415 | LOC Os01g53680.1 | DSYPNLRALRNASAMSLPDDAAYA   | S | 67   |
| 418 | LOC Os01g54560.1 | PGGGGGGRRRSGSFGGLKRMSRVMTV | S | 34   |

|     |                  |                             |   |      |
|-----|------------------|-----------------------------|---|------|
| 423 | LOC Os01g55260.1 | KEAAMQPLRRLMSVLEARDELVP EE  | S | 326  |
| 425 | LOC Os01g55280.1 | SSPKLADRHSPRSPLHEKKRAGTRV   | S | 53   |
| 426 | LOC Os01g55280.1 | VVRTESGDKENQSAAGAEDGEEVSC   | S | 174  |
| 428 | LOC Os01g55350.1 | TLKRIRDPGFHVSPRAHLSKDIMDS   | S | 873  |
| 430 | LOC Os01g55420.1 | LGAPPRPAAAAASPSRAALPDKPWV   | S | 70   |
| 431 | LOC Os01g55490.1 | AIVDYAHDETAMSPEQEDGEINGID   | S | 139  |
| 433 | LOC Os01g56000.1 | THDSAGGAATLTSPGQNF GKAKHSY  | S | 522  |
| 435 | LOC Os01g56100.1 | QILKAREVLLQSSPTKKRLGPDDGS   | S | 262  |
| 437 | LOC Os01g56140.1 | KVNGGEITSNCLSALEEKCSKNEHD   | S | 876  |
| 439 | LOC Os01g56140.1 | QVIFKRSPEKSASHDQFVQNGVPPK   | S | 805  |
| 441 | LOC Os01g56300.1 | QQGDAKPLSRTSSYPQQPLQHRASE   | S | 169  |
| 442 | LOC Os01g56490.1 | EHS D VTPKRSCLSNQNRNSFDKAVK | S | 1095 |
| 443 | LOC Os01g56800.1 | ISMKVDTSEEGASDVSDNLDGSIEI   | S | 546  |
| 445 | LOC Os01g56800.1 | RAALEPLPCQPVSPKDDKCSQSRTK   | S | 390  |
| 446 | LOC Os01g56800.1 | GNLVDSEVTSISSSGRLNLADHYD    | S | 1179 |
| 447 | LOC Os01g56910.1 | SAIAKTSFRRKQSQLQADSATIEPI   | S | 871  |
| 450 | LOC Os01g57450.1 | AQAASAAAIHPTSPRYFFSSLAGTN   | S | 43   |
| 451 | LOC Os01g58550.1 | ARPLKKS LQKSLSMPASLDNAAAAT  | S | 45   |
| 452 | LOC Os01g58550.1 | LDNAAAATTCAASPEKSRAADFARA   | S | 62   |
| 456 | LOC Os01g59670.1 | ASHRDMFFRRHDSFNIGRTDATLER   | S | 579  |
| 457 | LOC Os01g59670.1 | ESSEQLDVIDAKSVDDIYAALKEHT   | S | 1172 |
| 460 | LOC Os01g59850.1 | AFFDGKLG SFLYSPGRLRDQM HEDR | S | 195  |
| 463 | LOC Os01g59990.1 | YPGKGIRFIRADSQVFLFANSKCKR   | S | 28   |
| 464 | LOC Os01g60040.1 | QNIIPPMDERALSGLQARMERLKSG   | S | 1981 |
| 466 | LOC Os01g60040.1 | SPKFAPSPVHTKSINNKTDCNEDDA   | S | 1875 |
| 467 | LOC Os01g60190.1 | FGHVTFFWNGNRSGYFDETK E EYVE | S | 374  |
| 468 | LOC Os01g60190.1 | AVGLPSEDDMGNSEVGHNALGAGRI   | S | 81   |
| 469 | LOC Os01g61180.1 | LERTVRTLDRQISQFVTMDRLIWAD   | S | 108  |
| 470 | LOC Os01g61370.1 | FSWESSPGVPKRSSACMHMAQEIMP   | S | 83   |
| 471 | LOC Os01g61370.1 | SWESSPGVPKRSSACMHMAQEIMPP   | S | 84   |
| 472 | LOC Os01g61430.1 | PTQYPNTLHSAKSLEVEDPSWLVDK   | S | 99   |
| 473 | LOC Os01g61590.1 | EVAIMRHLPKSASIVSLREACEDEG   | S | 137  |
| 477 | LOC Os01g61780.1 | GTSEMPDSEPD SARSRHDDFN FSE  | S | 689  |
| 482 | LOC Os01g61860.1 | KNFLDSQA EYDESSGEDQDAKVSPS  | S | 61   |
| 486 | LOC Os01g62310.1 | FSDPPSP LSPPLSPASAAAAA LANA | S | 31   |
| 489 | LOC Os01g62650.1 | SKDGTLGDSNSISQSKFQSEISDHQ   | S | 371  |
| 491 | LOC Os01g62650.1 | VRINSNEKKLNCSSSFNTASSKAVE   | S | 333  |
| 493 | LOC Os01g62650.1 | INSNEKKLNCSSSFNTASSKAVEPD   | S | 335  |
| 494 | LOC Os01g62650.1 | ATPD SHYVPRVPSPGLPPVGV RINS | S | 313  |
| 499 | LOC Os01g64000.1 | MEEAKVVDSGSGSGDAGGSGLCRQG   | S | 105  |
| 501 | LOC Os01g64250.1 | TTVSPYALARSPSVSAAEADGDDGV   | S | 50   |
| 502 | LOC Os01g64280.1 | MSQERSQSQSPRSPASAGVPFLSI    | S | 13   |
| 503 | LOC Os01g64450.1 | DSAELTRFELGGSDGAKRGQLLRYN   | S | 97   |

|     |                  |                            |   |      |
|-----|------------------|----------------------------|---|------|
| 508 | LOC Os01g64970.1 | KSSRTGYWSDAGSDEEEKEEEEERPE | S | 318  |
| 510 | LOC Os01g65230.1 | VRSHISRLASIDSFDSRWQDFLEPG  | S | 389  |
| 512 | LOC Os01g65330.1 | RSPTQRGHTITLSPNKASSNSSPLL  | S | 554  |
| 514 | LOC Os01g65900.1 | WADPMKNVILPNSPKESESSISCAG  | S | 162  |
| 516 | LOC Os01g66130.1 | ITDGSASADKSGSPEHCQLVAALHP  | S | 327  |
| 518 | LOC Os01g66140.1 | NDRKSVIVIDSDSDEDEDPHPEQHE  | S | 753  |
| 520 | LOC Os01g66520.1 | HLSSEKCEEQDGSIDDDENSRPSF   | S | 288  |
| 521 | LOC Os01g67126.1 | NLKKLTYEQRKASLVERLNALNSSA  | S | 277  |
| 522 | LOC Os01g67126.1 | KASLVERLNALNSSAGADDDDEEED  | S | 287  |
| 525 | LOC Os01g67170.1 | LVQNDGNSIALDSDDDLIRGSHKR   | S | 422  |
| 526 | LOC Os01g67250.1 | SAQAVDDMKGELSDIVHDNVNAFDN  | S | 857  |
| 527 | LOC Os01g67250.1 | LMEETVPSRVHESPVLSPQRKASPS  | S | 316  |
| 533 | LOC Os01g67550.1 | NPLGSLRLARLRSILDEGKSLQLQF  | S | 519  |
| 537 | LOC Os01g68120.1 | VKIASRESGNLSPGFVPNEEINEY   | S | 507  |
| 542 | LOC Os01g68810.1 | DKFRPMDHDKSASEEQILSRPEKSK  | S | 1493 |
| 544 | LOC Os01g68970.1 | SNSFIKNFEKSFSSSTFRTLHLVNEI | S | 140  |
| 545 | LOC Os01g69030.1 | DTPMKKKFQRNFSELTVSWSDENKE  | S | 117  |
| 553 | LOC Os01g69130.1 | AHGLSSSFQDGSSPYSTPKQPRSRK  | S | 787  |
| 561 | LOC Os01g69990.1 | NSGKLGLRSSSGSMLDMQRGDFSGI  | S | 1321 |
| 562 | LOC Os01g69990.1 | SVEQHEHLERSLSLHERLHRGGQGI  | S | 1080 |
| 563 | LOC Os01g69990.1 | VDIPVSTNKEAGSFISPSGTSVDGP  | S | 1452 |
| 565 | LOC Os01g69990.1 | VHPQQHRLQEQLSGNLARLDRHWS   | S | 1156 |
| 567 | LOC Os01g69990.1 | HFDLLQSLQRSSSVEQHEHLERSLS  | S | 1068 |
| 571 | LOC Os01g70020.1 | SEVKHIIIEEVINSMSDDEEGEDNA  | S | 475  |
| 577 | LOC Os01g70320.1 | LRAGSPVYGRQRSGSSTGSSSPGGV  | S | 16   |
| 579 | LOC Os01g70330.1 | NPGIQLPLKKAVSFQDDNRHTVGPS  | S | 315  |
| 580 | LOC Os01g71000.1 | LDDLDMTGSQMGSPAQTGRKRETPR  | S | 444  |
| 584 | LOC Os01g71050.1 | ETSFLREVPAPVSPVKETPILREVP  | S | 216  |
| 586 | LOC Os01g71230.1 | EQFKAPDLNVISKAEPASAAQDDE   | S | 144  |
| 589 | LOC Os01g71990.1 | GKHPGQLKDMVTSPAGTTITGIQEL  | S | 246  |
| 591 | LOC Os01g72320.1 | VHKDGS DHYRLRSPFGSPPKNALDK | S | 177  |
| 592 | LOC Os01g72320.1 | GSDHYRLRSPFGSPPKNALDKAFSD  | S | 181  |
| 594 | LOC Os01g72710.1 | LAQLGRKLES LPSDLAAAVEGGRVT | S | 121  |
| 595 | LOC Os01g72890.1 | PPPKKASPPRKASPAPESVVLHIDH  | S | 101  |
| 596 | LOC Os01g72890.1 | ASPPRKASPAPESVVLHIDHLSRNV  | S | 106  |
| 599 | LOC Os01g72890.1 | PRRRSPGPIRRRSPPPPRRRPRSP   | S | 330  |
| 600 | LOC Os01g72890.1 | RRLRGSPSPRRRSPPGPIRRRSPPPP | S | 322  |
| 603 | LOC Os01g73160.1 | GEKGGAPAEFQPSFRGSRPGFGRGG  | S | 155  |
| 604 | LOC Os01g73300.1 | KIILHKTIDSVLSRGERLDSLVEKS  | S | 178  |
| 605 | LOC Os01g73620.1 | FEASAVKSNFGSSPDFKHSNHSSVH  | S | 825  |
| 607 | LOC Os01g73644.1 | VLDSVVGMDFLLSDSGGNVGADGKT  | S | 55   |
| 608 | LOC Os01g73644.1 | DSVVGMDFLLSDSGGNVGADGKTRY  | S | 57   |
| 611 | LOC Os01g73950.1 | ADAVRALEDGSDSDASAELEKLEG   | S | 154  |

|     |                  |                            |   |      |
|-----|------------------|----------------------------|---|------|
| 614 | LOC Os01g74030.1 | IGMPGLEIGRQNSFSGIFQDDSYQH  | S | 146  |
| 615 | LOC Os01g74030.1 | ASPDPELVRRVPSPCLPPIGVKLGA  | S | 236  |
| 616 | LOC Os01g74030.1 | QYMDQTNGNQRHSMKRSEQGHVKV   | S | 324  |
| 619 | LOC Os01g74370.1 | RHSRSGDGNGWASPRTMVWRTELK   | S | 18   |
| 621 | LOC Os02g01020.1 | RALSRDSVYDLDESEDEQWLTQLNHS | S | 650  |
| 627 | LOC Os02g01380.1 | AGGNGGEEAKGSSELLDAVVKYPDV  | S | 297  |
| 629 | LOC Os02g01490.1 | SPLMPGKQSHSRSNSNSSVQFNSLT  | S | 1494 |
| 633 | LOC Os02g01510.1 | SRSRSDMKKASSLSELGFDAEGAS   | S | 45   |
| 636 | LOC Os02g01960.1 | KQKSLENLFVTNSQRVKKDAGRWS   | S | 581  |
| 637 | LOC Os02g02050.1 | DSQTKHQLETVLSQRGETCGHLGDA  | S | 1861 |
| 639 | LOC Os02g02290.1 | PPAPSSSSKKLRSLALDSRPGALS   | S | 1707 |
| 641 | LOC Os02g02290.1 | IYREIDDDDFEESDDDSEERTSSL   | S | 1615 |
| 646 | LOC Os02g02410.1 | IKLIKKKYSKDISKDNRALGKLRE   | S | 283  |
| 647 | LOC Os02g02570.1 | RSCEKLESSASSSPQEANVANKGI   | S | 320  |
| 651 | LOC Os02g03040.1 | GSPDYGRGGDRGSPDYHRGASPGG   | S | 229  |
| 656 | LOC Os02g03080.1 | SNLGKWQENFVSSQGRQGGGRSGYS  | S | 858  |
| 658 | LOC Os02g03080.1 | AEEDPEKIAMSESEDEGDDDEDDQD  | S | 214  |
| 659 | LOC Os02g03740.1 | DTKAFSALSLSSSSRDTQDGSKNKP  | S | 236  |
| 660 | LOC Os02g03740.1 | ESDTKAFSALSLSSSSRDTQDGSKN  | S | 234  |
| 664 | LOC Os02g04050.1 | TEVMNLLESAGFSRSPYVYVQQK    | S | 131  |
| 667 | LOC Os02g04270.1 | AEVTKDGGDDSDGMDDDAMFRID    | S | 995  |
| 668 | LOC Os02g04450.1 | SFGFLSQIPRNFSFSDLTEDFSQSA  | S | 267  |
| 670 | LOC Os02g04660.1 | RSNHNVSQGGVLSGDEHNTEDTAVR  | S | 275  |
| 672 | LOC Os02g05330.1 | LGVKVHACVGGTSVREDQRILASGV  | S | 148  |
| 675 | LOC Os02g05450.1 | YTSRRALQORTESSSELISVSKRAT  | S | 23   |
| 680 | LOC Os02g05840.1 | MPGGSGLDQNGSPKANSGGQSDPS   | S | 458  |
| 681 | LOC Os02g05900.1 | DVGEDPEERQMVSLNRLFCHKRDVS  | S | 29   |
| 682 | LOC Os02g06430.1 | EVAPQHPPERTVSLPSDSGNLGVKP  | S | 625  |
| 683 | LOC Os02g06740.1 | SRLSSMCLIPKLSIVKGSKCHSCVQ  | S | 335  |
| 684 | LOC Os02g06920.1 | GQQVKATTSRSFSFTKVINLSAKR   | S | 129  |
| 687 | LOC Os02g07070.1 | GRNQRDGFYDDNSFGRRREYDWDER  | S | 218  |
| 689 | LOC Os02g07070.1 | DSYERDRDYDRYSYDSYKSRRDG    | S | 138  |
| 691 | LOC Os02g07190.1 | LKRAGLDDSLSEFRFRTIFKDKSA   | S | 809  |
| 694 | LOC Os02g07260.1 | NPKKPFAAIVGGSKVSTKIGVIESL  | S | 201  |
| 696 | LOC Os02g07870.1 | FGCGKTVISQALSKYSNSQAVVYVG  | S | 264  |
| 697 | LOC Os02g08190.1 | AAKSSAAAATPASIDAIDRHLRSLH  | S | 56   |
| 698 | LOC Os02g08190.1 | SIWEDATDGFVPSPSRSPMPSRSP   | S | 240  |
| 699 | LOC Os02g08300.1 | LVVMLS KSKASGSSGALSSLTSTP  | S | 82   |
| 703 | LOC Os02g08360.1 | LPASKWSREDDVSDDEDKGGRLG    | S | 774  |
| 704 | LOC Os02g08360.1 | RRRLQSEYGLSFSNDGANSRRSSER  | S | 873  |
| 707 | LOC Os02g08360.1 | DEDRKGGRLGLSYSSGSDIAGDSG   | S | 788  |
| 712 | LOC Os02g09920.1 | SFQDNLEASSTKSIELDADNNEMDT  | S | 422  |
| 713 | LOC Os02g10020.1 | ECAEEPVPQVPKSTKPSILKLRQAT  | S | 361  |

|     |                  |                            |   |     |
|-----|------------------|----------------------------|---|-----|
| 719 | LOC Os02g10510.1 | RDEEKLSKLASLSQGAAGESSTARE  | S | 337 |
| 722 | LOC Os02g10790.1 | CAENLRSANLLQSPGSSNLAMNGNK  | S | 478 |
| 724 | LOC Os02g10970.1 | SKTERNADIALTSNRSKSRFPIFLH  | S | 408 |
| 727 | LOC Os02g10970.1 | SKRHHRGRKSKASSQVSGENHTALA  | S | 345 |
| 730 | LOC Os02g10970.1 | SATPRSLAQEDKSPKENGDTRTNGV  | S | 381 |
| 732 | LOC Os02g11750.1 | NDRVKMSEKELQSLIDDAMGEVDIG  | S | 314 |
| 735 | LOC Os02g11750.1 | SRDLSVSSDDLHSDAKRQLNKAIQM  | S | 226 |
| 739 | LOC Os02g11820.1 | DDRNSRYSYGERSPGYEHNDYKKSP  | S | 186 |
| 740 | LOC Os02g11820.1 | NRRSDGNWGGSRPPYNESYSRRS    | S | 156 |
| 741 | LOC Os02g11820.1 | SENRRSDGNWGGSRPPYNESYSR    | S | 154 |
| 742 | LOC Os02g11820.1 | PPPQMORTSTASSIGSSEGTSEQIK  | S | 327 |
| 744 | LOC Os02g11820.1 | NGSPNYQKETDGSSPVVRPVRDILG  | S | 246 |
| 747 | LOC Os02g12360.1 | DQDISGAGKKWDSSEEDDLGYKEL   | S | 640 |
| 750 | LOC Os02g13130.1 | DHYSSKRKYDDPSPPPRRTGFSSAP  | S | 16  |
| 751 | LOC Os02g13130.1 | LINEVLAEADAASSGNLSSRKYNAP  | S | 220 |
| 753 | LOC Os02g13170.1 | KELLLKDVARANSIEVSILKDRLYK  | S | 419 |
| 758 | LOC Os02g14530.1 | NWWSSHAEHKLGSIISLTKQERNSGS | S | 31  |
| 762 | LOC Os02g14530.1 | TSNMRRGRRRSISFTPEIGDDIVSA  | S | 401 |
| 763 | LOC Os02g14770.1 | AAAGKAAMERHQSIDAQLRLLAPGK  | S | 15  |
| 765 | LOC Os02g14780.1 | DEQPKQVIWDGHSGSIGRTATQALS  | S | 513 |
| 766 | LOC Os02g15060.1 | SHRTCPMCRCDLSPPREVAAKEATA  | S | 151 |
| 770 | LOC Os02g15220.1 | KNPKPPNPSPSSSPLAQTLASIRR   | S | 64  |
| 772 | LOC Os02g15220.1 | SPSSSPLAQTLASIRRSIRRPEDGP  | S | 73  |
| 774 | LOC Os02g15310.1 | SYSPAPRRRDDYSASPQRKDTHRAK  | S | 177 |
| 777 | LOC Os02g16090.1 | QPVFDKISGRVASWRGKNMAVAGRT  | S | 786 |
| 779 | LOC Os02g16620.1 | AGKAHVLSRQYSVLDKVLSKIPR    | S | 209 |
| 781 | LOC Os02g17980.1 | LLDRVERRLTASSMFLPQGGRLTLI  | S | 222 |
| 783 | LOC Os02g18660.1 | TTAASDDGTLVGSKKGKADNGKLDG  | S | 447 |
| 785 | LOC Os02g18660.1 | GGDEEGEEVEGDSSSESEPEPEPVKK | S | 98  |
| 786 | LOC Os02g18660.1 | GDEEGEEVEGDSSSESEPEPEPVKKE | S | 99  |
| 787 | LOC Os02g18660.1 | EEGEEVEGDSSSESEPEPEPVKKESA | S | 101 |
| 788 | LOC Os02g18660.1 | PPPQKPSGRGAASSDEEEEEEDSD   | S | 59  |
| 791 | LOC Os02g18660.1 | SKYNLAPEPSPSSKSGKALSRTTD   | S | 194 |
| 794 | LOC Os02g19150.1 | YKRIHCELLSSRSAGDCSETDSCAS  | S | 191 |
| 796 | LOC Os02g19170.1 | PTLASMLKKKVTSKDRIAERLLNAR  | S | 685 |
| 799 | LOC Os02g19420.1 | DLLDPELKRHAPSELRKKREMFQNL  | S | 33  |
| 801 | LOC Os02g19860.1 | VAPPSRRPLKRMSSPERWEAKQLIA  | S | 418 |
| 803 | LOC Os02g19860.1 | FLQGQSRFSIDMSPVKIFKNPEGSL  | S | 483 |
| 808 | LOC Os02g22090.1 | DGQTACSKNQGLSDGEIGNGKSDFV  | S | 252 |
| 809 | LOC Os02g22210.1 | KSEIAKLKVQLSSEFEMKDLGAAKK  | S | 835 |
| 811 | LOC Os02g22370.1 | QAQKRNALGRQPSQEILSEEKTLPL  | S | 531 |
| 813 | LOC Os02g24080.1 | GEIRGPMLTRDDSFIRKGSHEQRH   | S | 217 |
| 815 | LOC Os02g24080.1 | KPSRSSNPFSDSDDGGREQRPARA   | S | 63  |

|     |                  |                            |   |     |
|-----|------------------|----------------------------|---|-----|
| 816 | LOC Os02g24330.1 | PPPERRSFGRRGSPVRGEDNGSRPL  | S | 386 |
| 819 | LOC Os02g25060.1 | VDVTYKPFKEGSDVDTSDESGTIE   | S | 396 |
| 824 | LOC Os02g26140.1 | PPGKVQVAAAAASVSKTRRCTFSPS  | S | 316 |
| 826 | LOC Os02g26349.1 | PDAGRHKRRRDGSPAAAATDHKDDK  | S | 103 |
| 827 | LOC Os02g28810.1 | RTLDAHIEEQFGSGRLLACISSRPG  | S | 176 |
| 829 | LOC Os02g28980.1 | KRKETKLYGNMISKLSKLEDSETEG  | S | 602 |
| 834 | LOC Os02g30140.1 | LSSSLRSLSLSSSPRGHHRGATTR   | S | 39  |
| 837 | LOC Os02g30230.1 | SKNAADDMIRILSGFDNRLSQITSD  | S | 50  |
| 839 | LOC Os02g31150.1 | MKYWSEYRNFVSPPLKDSFSPVTS   | S | 410 |
| 840 | LOC Os02g31220.1 | SGGAEEGLYRLSSVGEEIDNLSNLS  | S | 75  |
| 843 | LOC Os02g32350.1 | ERLQIWQYGDVESDEEEQAPAAART  | S | 970 |
| 844 | LOC Os02g32469.1 | AKCVCAPATHAGSFKCRLHRTNSQG  | S | 66  |
| 845 | LOC Os02g32490.1 | AGASSDKLRHVESMSSELPAGAGRIS | S | 22  |
| 846 | LOC Os02g32550.1 | VARSRSVCGSRSFSGDFLERISNG   | S | 278 |
| 847 | LOC Os02g32550.1 | RSRSVCGSRSFSGDFLERISNGFG   | S | 280 |
| 848 | LOC Os02g33320.1 | QKNHPASHDQGHSPDVAPEQKSSDG  | S | 119 |
| 851 | LOC Os02g33320.1 | QQDIKDSRLSGESPVIPLRLKIQRN  | S | 496 |
| 852 | LOC Os02g33320.1 | PEGLRSMVSNVSPLLVSGSPQHNL   | S | 436 |
| 856 | LOC Os02g33360.1 | VKVVDVPGTGSSMDGEVKQAPDGS   | S | 91  |
| 857 | LOC Os02g33610.1 | EDSETKSSGKFGSFSAPRHSSRSSG  | S | 670 |
| 860 | LOC Os02g33770.1 | AVIDMNKMLSEGSGGPTAEKSPSTP  | S | 321 |
| 863 | LOC Os02g34500.1 | SHKDSLMEQETDLSPSTASHKDSLLE | S | 495 |
| 864 | LOC Os02g34560.1 | INVERQRSFDDRSLSDVSYSGGGHG  | S | 48  |
| 869 | LOC Os02g34560.1 | MELAVGAGGMRRSASHTLSSESDDF  | S | 13  |
| 873 | LOC Os02g34570.1 | TAGGSDETQEAISPKSLKDAVKPKH  | S | 373 |
| 874 | LOC Os02g34590.1 | DRVMEGQGAVTNSGDEMGMRAYGDE  | S | 60  |
| 875 | LOC Os02g34680.1 | HQWPRNVLYEDDSEETEEEGDNVGD  | S | 312 |
| 876 | LOC Os02g34840.1 | KRRAAGDDGPSESADDDIVVAQISK  | S | 30  |
| 877 | LOC Os02g34840.1 | AAKRRAAGDDGPSESADDDIVVAQI  | S | 28  |
| 878 | LOC Os02g35150.1 | GNGERSDTLEVTSDSDTRDMSSDAW  | S | 639 |
| 879 | LOC Os02g35150.1 | HDTSDDRWVATNSDVSDLETQYQR   | S | 574 |
| 883 | LOC Os02g35190.1 | GQSQHRAPEREGSHNYDIESTDGSG  | S | 15  |
| 884 | LOC Os02g35690.1 | GGGGGGGREDASDGATSTLIDAWG   | S | 65  |
| 886 | LOC Os02g35910.1 | LRCWPGLCLSRSIGDQDVGQFIVP   | S | 222 |
| 887 | LOC Os02g36974.1 | LRDNLTLWTSDISEDAAEIKEAPK   | S | 243 |
| 889 | LOC Os02g37030.1 | QQKHCSGNGGGRSFSSGSSAWSSSR  | S | 143 |
| 891 | LOC Os02g37130.1 | SSKENNGVMWISSPDRLDPRKPFQ   | S | 134 |
| 893 | LOC Os02g37870.1 | PADDEEAEAEAAASEGEEDAAAAAAA | S | 49  |
| 894 | LOC Os02g37880.1 | KEALLVMEFCEKSLVSAMESRGTY   | S | 113 |
| 895 | LOC Os02g37920.1 | DPGKEMDPAIDGSDMCLTEKENV    | S | 366 |
| 897 | LOC Os02g38050.1 | TSLGSQPLDTQNSKSSGARGLKTLS  | S | 237 |
| 899 | LOC Os02g38050.1 | GLKTLVSVEAPATSGVKSSQGGQASL | S | 256 |
| 900 | LOC Os02g38220.1 | SGSGKVTAHLSNSPDESQITESMEQ  | S | 463 |

|     |                  |                           |   |      |
|-----|------------------|---------------------------|---|------|
| 905 | LOC Os02g38480.1 | APDDLGGSRARSRLDESIAVIDFPD | S | 94   |
| 906 | LOC Os02g38840.1 | SPSSGRASFSSLSGLKDLELSSESG | S | 21   |
| 907 | LOC Os02g38920.1 | VVDLTVRLEKPASYDQIKAAIKEEA | S | 256  |
| 909 | LOC Os02g38920.1 | EEDLVSTDFQGDSRSSIFDAKAGIA | S | 292  |
| 910 | LOC Os02g38920.1 | GGRAASFNIIPSSTGAACKAVGKVL | S | 212  |
| 917 | LOC Os02g38980.1 | PVEEDVDICGNASPILEKDAHNNP  | S | 439  |
| 918 | LOC Os02g39010.1 | NEQDRRFKKHMKSPDPLEEQRMKEQ | S | 671  |
| 920 | LOC Os02g39520.1 | EGKEVILVDDNDSEQEDGGSGKVDE | S | 65   |
| 925 | LOC Os02g39750.1 | VRRWSSAARPEASSRASSCAATAST | S | 136  |
| 926 | LOC Os02g39820.1 | HCEEVKEMTRFASDVGIRGEMLREL | S | 178  |
| 927 | LOC Os02g39840.1 | QFNNQDKLSSQFSAKAQVGPAPALV | S | 176  |
| 928 | LOC Os02g39890.1 | SEKNPRFREKGSDEEDDDYDKRRR  | S | 230  |
| 931 | LOC Os02g39920.1 | YDNIATICEDSSDVKEDMDADPSG  | S | 253  |
| 932 | LOC Os02g39920.1 | EGEAAAEEVEQGSAGGASTGGKKRR | S | 740  |
| 935 | LOC Os02g40880.1 | WGKKLIVQKRASLNDFRFKVMLA   | S | 101  |
| 937 | LOC Os02g41550.1 | TFDIPKVVLRETSPCALPIDQRVPH | S | 526  |
| 938 | LOC Os02g41990.1 | DSAVARSNDVEISPSEGLRNRKQSN | S | 218  |
| 939 | LOC Os02g42040.1 | AASVEKPENELSDSESQKVQPHDT  | S | 824  |
| 940 | LOC Os02g42040.1 | EKPENELSDSESQKVQPHDTAFSA  | S | 828  |
| 941 | LOC Os02g42040.1 | VLEGSKDPRAVESESGEETVDEEGG | S | 972  |
| 942 | LOC Os02g42040.1 | EGSKDPRAVESESGEETVDEEGGSA | S | 974  |
| 943 | LOC Os02g42540.1 | PSQPAENDKPKQSPEDSVNKVSSPQ | S | 152  |
| 946 | LOC Os02g42580.1 | APLPAASLVRASLSEILDVKTETG  | S | 337  |
| 947 | LOC Os02g43020.1 | QRPEASESSQSSSPSPQPEQPEA   | S | 208  |
| 948 | LOC Os02g43020.1 | RPEASESSQSSSPSPQPEQPEAK   | S | 209  |
| 949 | LOC Os02g43020.1 | ASESSQSSSPSPQPEQPEAKARE   | S | 212  |
| 954 | LOC Os02g43370.1 | PEIERCDAGDVESDHDGAAAAAERV | S | 18   |
| 955 | LOC Os02g43740.1 | ELVAEPTSARSMSFVGTHEYLAPEI | S | 528  |
| 961 | LOC Os02g44690.1 | SGLLRGAFFFGSSEGEEDKTRKK   | S | 143  |
| 962 | LOC Os02g44740.1 | KTDSDVTSAPSSPPRSPRRSAYYV  | S | 18   |
| 963 | LOC Os02g44740.1 | DVTSAPSSPPRSPRRSAYYVLSA   | S | 22   |
| 966 | LOC Os02g44770.1 | GLMTGKSGQIAKSGPLEEEEDPFM  | S | 334  |
| 967 | LOC Os02g44810.1 | SSSDPDQEPTSPSAAGADGAQPRAP | S | 32   |
| 969 | LOC Os02g44810.1 | PPHPKRRKMSSSDPDQEPTSPSAA  | S | 22   |
| 970 | LOC Os02g45070.1 | RARFYMEPDTSDSGSMASGAHTRGG | S | 1036 |
| 971 | LOC Os02g45070.1 | RFYMEPDTSDSGSMASGAHTRGGGP | S | 1038 |
| 981 | LOC Os02g46090.1 | LRSKYFASFRGASQRHDEAGYAPVA | S | 21   |
| 983 | LOC Os02g46650.1 | ADITNLDRPSTSPKRRKFFSDDNE  | S | 562  |
| 987 | LOC Os02g46962.1 | SEVSKKMTAGMSSMSFKMKEIFQGG | S | 33   |
| 991 | LOC Os02g47140.1 | SSLAPKIGPLGLSPKKIGEDIAKET | S | 38   |
| 992 | LOC Os02g47150.1 | KKQPAKKASTQLSDDDEDEVLALKD | S | 1292 |
| 993 | LOC Os02g47150.1 | PAAQKKQPAKKASTQLSDDDEDEVL | S | 1288 |
| 994 | LOC Os02g47170.1 | SKEKITTAEKIRSDGSDFDESIEKC | S | 239  |

|      |                  |                            |   |      |
|------|------------------|----------------------------|---|------|
| 1007 | LOC Os02g48010.1 | NLEVKKDDGQGSVTVGGTRKRRFA   | S | 963  |
| 1008 | LOC Os02g48010.1 | TVEATADDTEGTSKAEPEATGSKGA  | S | 1059 |
| 1010 | LOC Os02g48010.1 | SLLQKCSRIFKFSPRKAEQSSEQQ   | S | 786  |
| 1012 | LOC Os02g48010.1 | SEQDEDSEAHSESVSLGGQRRKRRQ  | S | 992  |
| 1013 | LOC Os02g48010.1 | KGRAKGGVKRTRSVLAVVEDAKEIL  | S | 936  |
| 1018 | LOC Os02g48380.1 | QPPMNLALPDFSKASILARTAKAR   | S | 48   |
| 1021 | LOC Os02g48640.1 | YPEFAAGLVRQDSFGGGELPRQDSF  | S | 465  |
| 1022 | LOC Os02g48640.1 | DSFAIGELRRQGSYGVELVRQDSFG  | S | 487  |
| 1024 | LOC Os02g48730.1 | EAMSSAVDAISCSKGIAAPPTTEAT  | S | 134  |
| 1025 | LOC Os02g48740.1 | KVKASGRTSQMESFKDKSLSNGRFF  | S | 549  |
| 1031 | LOC Os02g49070.1 | AVKSVTSSISSASGKHVADDTREFV  | S | 164  |
| 1035 | LOC Os02g49070.1 | FLKPSLRITSKGSFDTNAVKSPTS   | S | 146  |
| 1037 | LOC Os02g49080.1 | SEGSPAYSWRGGSQGSSSGLIVKKT  | S | 126  |
| 1038 | LOC Os02g49080.1 | SPAYSWRGGSQGSSSGLIVKKTMKV  | S | 129  |
| 1039 | LOC Os02g49090.1 | MPTSFTDSYSVSGSPKSSTVDQQSE  | S | 618  |
| 1044 | LOC Os02g49450.1 | GLDDDFDKIDGTSGLESDDDDDDKEK | S | 281  |
| 1045 | LOC Os02g49620.1 | KKQMCLKSSQTSDDDMLELLTSKKD  | S | 80   |
| 1046 | LOC Os02g49992.1 | ANVSPIKGAEFSSPGQLGLTARGDQ  | S | 229  |
| 1049 | LOC Os02g50550.1 | GLNTPEGGSMRQSHSDGSLDTMARK  | S | 724  |
| 1054 | LOC Os02g50570.1 | GGSTSAGLGRSNSPEQIFLLEPRKS  | S | 475  |
| 1056 | LOC Os02g50620.1 | VLEMDTYRYHGHSMSPGSTYRTRD   | S | 293  |
| 1058 | LOC Os02g50620.1 | AVGMEAAITRSDSIITAYRDHCTYL  | S | 112  |
| 1059 | LOC Os02g50700.1 | TMHETKEAVVGESDDEKEKFKQRVE  | S | 142  |
| 1060 | LOC Os02g50790.1 | RLIPSPQTRDDASQGETTDANPPLK  | S | 748  |
| 1061 | LOC Os02g50799.1 | PLVAADPCDLAGSPMKEMAFSDPAN  | S | 377  |
| 1066 | LOC Os02g50840.1 | VRFPNPGRSPARSASGGSFEDPSFT  | S | 683  |
| 1069 | LOC Os02g50840.1 | FPNPGRSPARSASGGSFEDPSFTGS  | S | 685  |
| 1071 | LOC Os02g50840.1 | EISKSELISSSPSRNSSANEQGCE   | S | 844  |
| 1079 | LOC Os02g50880.1 | SRRHEAPADADGSRPPSPRRGEAK   | S | 63   |
| 1085 | LOC Os02g50970.1 | ERRQSVAAERRRSQEEEWERRRSQE  | S | 102  |
| 1092 | LOC Os02g52250.1 | SKILALTVDAKGSVAFDAVVKQGEN  | S | 110  |
| 1095 | LOC Os02g52250.1 | RASGSPPVPVMHSPRPVTVKDQQD   | S | 247  |
| 1096 | LOC Os02g52250.1 | KFKHKRVPRASGSPPVPVMHSPRP   | S | 239  |
| 1097 | LOC Os02g52280.1 | DSKELVMESDIRSRMQALKDQLVEA  | S | 925  |
| 1100 | LOC Os02g52780.1 | AAVGAPPVQRQGSLLPRTLSSQKTV  | S | 98   |
| 1101 | LOC Os02g52810.1 | PSKWEDAEEKWILSPVSCDIGRMSA  | S | 246  |
| 1110 | LOC Os02g54010.1 | SDAVGMMDEKVDSDGEDIIDHHVDE  | S | 493  |
| 1116 | LOC Os02g54500.1 | DFENASTDSEKLSRFLSYFQLRSP   | S | 937  |
| 1117 | LOC Os02g54510.1 | NTGTDQDSDVHSGSEQQKSSGIEAT  | S | 779  |
| 1119 | LOC Os02g54510.1 | FDERIPDDFVRHSPKYRHYEVHSPQ  | S | 252  |
| 1121 | LOC Os02g54510.1 | GEMDSPWSPAYISPGHYGVHDPRDF  | S | 215  |
| 1123 | LOC Os02g54770.1 | ECRLRIGPGLGSGKRRSRSRSRSR   | S | 112  |
| 1125 | LOC Os02g55060.1 | ALGKMSKDDADVSGDLSGLSDKELG  | S | 69   |

|      |                  |                            |   |      |
|------|------------------|----------------------------|---|------|
| 1127 | LOC Os02g55940.1 | DQKTKDDIKKTRSMQGLSFLANIGG  | S | 290  |
| 1131 | LOC Os02g56270.1 | PTQDERPMERKPSNQQIASPPPNYE  | S | 295  |
| 1134 | LOC Os02g56480.1 | AKNDDRHTTNPVSDHVVVSPVVSPG  | S | 280  |
| 1136 | LOC Os02g56480.1 | HTTNPVSDHVVVSPVVSPGGEFQRQI | S | 286  |
| 1138 | LOC Os02g56480.1 | LLRPAPGSGGGSSRGGSTPRLRVFL  | S | 142  |
| 1140 | LOC Os02g56530.1 | LQPLDEFATPPSSPTQFQDAKGKES  | S | 535  |
| 1143 | LOC Os02g56740.1 | PTVLDQDDSDVSAVEDDDYSKFKEK  | S | 557  |
| 1147 | LOC Os02g57080.1 | RIEGARDPRFALSTGGHAQSPALQN  | S | 697  |
| 1150 | LOC Os02g57390.1 | DSSRAQLQSRSESMNGLRSGSTSPS  | S | 254  |
| 1151 | LOC Os02g57390.1 | TTPDPQLIRRTSPCLPPVGVVMGS   | S | 305  |
| 1153 | LOC Os02g57390.1 | SHNFASAVGSSISRSTTPDPQLIRR  | S | 290  |
| 1155 | LOC Os02g57500.1 | APAAGGERAPSPSPPPPPRLPALKS  | S | 30   |
| 1158 | LOC Os02g57600.1 | EHKLKDDLHWIPSFDKGKNLSLVDM  | S | 120  |
| 1159 | LOC Os02g57600.1 | EHQKELSGQDAVSAEGDDEKFDQDC  | S | 95   |
| 1165 | LOC Os02g57660.1 | PHSKNVSLERRWSLEVAIEKFIGHD  | S | 322  |
| 1166 | LOC Os02g57660.1 | GHDATGSSGLERSESINDSDLPMLE  | S | 344  |
| 1167 | LOC Os02g57660.1 | DATGSSGLERSESINDSDLPMLERE  | S | 346  |
| 1169 | LOC Os02g57820.1 | RPPGSGKMQQLASLGKWLGSVGTG   | S | 197  |
| 1171 | LOC Os02g57980.1 | AKKDMRFARFGASSEEEESGYDELEA | S | 260  |
| 1174 | LOC Os02g57980.1 | AGRFRKLRPDSSDEDEDISTAKK    | S | 238  |
| 1177 | LOC Os02g58110.1 | TSLRGIVPAGEQSGDESKRKGGRA   | S | 525  |
| 1179 | LOC Os02g58110.1 | TQGERKILDKLRSYQGTPFIEGLMG  | S | 52   |
| 1180 | LOC Os02g58210.1 | AAEEVEAAAIDGSGEEAKRKSGKQR  | S | 14   |
| 1182 | LOC Os02g58220.1 | SPAKTYSAMGSSSSNGFSEMTTPTS  | S | 184  |
| 1185 | LOC Os02g58340.1 | LEVFSVFRGREPSPEALLRHNGLLP  | S | 754  |
| 1187 | LOC Os02g58410.1 | GLQLTKDASSLGSSSPIQEQNQKAY  | S | 1900 |
| 1188 | LOC Os02g58410.1 | QLTKDASSLGSSSPIQEQNQKAYYV  | S | 1902 |
| 1189 | LOC Os02g58410.1 | SAVTGRSVSGPLSPLAPEVSI PNPT | S | 1443 |
| 1190 | LOC Os02g58410.1 | SRRNDAPLSRSDSLSIINGMRYLKL  | S | 164  |
| 1195 | LOC Os02g58490.1 | QQQGRGCRARGASPPPPPPQQQQQQQ | S | 54   |
| 1197 | LOC Os02g58570.1 | MAQAQWGVVDGYGSMKGLIRLRTSPH | S | 150  |
| 1199 | LOC Os03g01470.1 | LAGRRRGPHGDGSAEPTARAAAASA  | S | 109  |
| 1200 | LOC Os03g01470.1 | GSAEPTARAAAASARRRLVAVRRQ   | S | 120  |
| 1201 | LOC Os03g01490.1 | KECKNPQLVNLGSGRFCITRFFHSR  | S | 338  |
| 1204 | LOC Os03g01710.1 | SSNGGMHVGRQDSASSYVSASRGDD  | S | 246  |
| 1205 | LOC Os03g01710.1 | DRSPTNDDIDSKSDGSDSVANRSVR  | S | 174  |
| 1206 | LOC Os03g01710.1 | PTNDDIDSKSDGSDSVANRSVRSSS  | S | 177  |
| 1207 | LOC Os03g01710.1 | NDDIDSKSDGSDSVANRSVRSSSGN  | S | 179  |
| 1208 | LOC Os03g01710.1 | RIAMQAKLVRLESDLSAVEASHVHE  | S | 1196 |
| 1209 | LOC Os03g01970.1 | SDNAAIDEGRKQSPPEVSGPESGQC  | S | 605  |
| 1210 | LOC Os03g01970.1 | RKQSPPEVSGPESGQCEAEADGEDN  | S | 614  |
| 1211 | LOC Os03g01970.1 | IDEGRKQSPPEVSGPESGQCEAEAD  | S | 610  |
| 1212 | LOC Os03g02010.1 | YDTAGNCDRTPHSDGSGDEDDFFQEM | S | 167  |

|      |                  |                            |   |      |
|------|------------------|----------------------------|---|------|
| 1213 | LOC Os03g02010.1 | AGNCDRTPHSDGSGDEDDFFQEMSEK | S | 170  |
| 1214 | LOC Os03g02150.1 | PASNHLTLVKMPSQNIITEESNVAYE | S | 657  |
| 1215 | LOC Os03g02160.1 | SSPDNHDIKCEYSSPTPIPESEKELS | S | 359  |
| 1218 | LOC Os03g02310.1 | MKAGRKNLRRACSEGAVTLGEGESI  | S | 13   |
| 1219 | LOC Os03g02320.1 | LALPTRASANSLSAPIRSSGGYVGS  | S | 540  |
| 1220 | LOC Os03g02480.1 | SDRSSSVLSQRFSDLENRAKSRRS   | S | 422  |
| 1221 | LOC Os03g03034.1 | SDDPAKKIRLSTSFNVRKETVHNWR  | S | 111  |
| 1223 | LOC Os03g03430.1 | KINHRDAHADGLSPSRVSIAGSRRS  | S | 348  |
| 1225 | LOC Os03g03460.1 | QKTDELSAVEGSGSNYSRRDDDTAM  | S | 229  |
| 1226 | LOC Os03g03460.1 | SQQKTDELSAVEGSGSNYSRRDDDT  | S | 227  |
| 1227 | LOC Os03g03460.1 | FASPEDSKYKQKSPAESPMEITSET  | S | 266  |
| 1230 | LOC Os03g03560.1 | VEGANTQEVCECNSPEMATERFRSDS | S | 623  |
| 1232 | LOC Os03g03830.1 | DLGYDFGEESVRSPSSAGRSASGSP  | S | 852  |
| 1234 | LOC Os03g03830.1 | SAGRSASGSPFVSSNFAMHDSSPSK  | S | 867  |
| 1235 | LOC Os03g03830.1 | DDSSSYNLGRFDSFRSQESGFFPQE  | S | 998  |
| 1236 | LOC Os03g03830.1 | SPKSSTNFRFDSFDDADPFGSSGP   | S | 1044 |
| 1237 | LOC Os03g03830.1 | NNSKGENVTGFDSPKSSTNFRFDS   | S | 1032 |
| 1239 | LOC Os03g03870.1 | SNQKSGLTSNEDSGEEHLARTEPVA  | S | 298  |
| 1243 | LOC Os03g04710.1 | ETIQSFTQRGASTDEEEEEDDDDG   | S | 117  |
| 1245 | LOC Os03g04920.1 | SSVPIKRLTPSVSNIDNLKNKVSNN  | S | 878  |
| 1247 | LOC Os03g05200.1 | MESLHSSVKGVSDEEEELNMKQEI   | S | 607  |
| 1251 | LOC Os03g05390.1 | QLAIKSLRASSMSHEMVEVSTVTDR  | S | 296  |
| 1252 | LOC Os03g05390.1 | QQRSVIIEDSPPSPASNGDKEKEDE  | S | 336  |
| 1253 | LOC Os03g05390.1 | SVIIEDSPPSPASNGDKEKEDEVAE  | S | 339  |
| 1257 | LOC Os03g05390.1 | EVTSHRFTPARMSHVSSLNPDDMDC  | S | 240  |
| 1260 | LOC Os03g05390.1 | MDCISEPIIRSNSVRSTSANENLRS  | S | 262  |
| 1261 | LOC Os03g05390.1 | ISEPIIRSNSVRSTSANENLRSRSV  | S | 265  |
| 1266 | LOC Os03g06120.1 | SEKLQVELQRSQSNMDMGQCEVIQH  | S | 208  |
| 1267 | LOC Os03g06120.1 | RMEYIERDQCEYSFDDDEDKEVQDAL | S | 150  |
| 1269 | LOC Os03g06220.1 | ADGGKPPTPEKKSADVEEEEEAKA   | S | 14   |
| 1273 | LOC Os03g06950.1 | TKDKSDTSDSSTSPHNEECESFGAV  | S | 482  |
| 1274 | LOC Os03g06950.1 | KILEEELADNVGSDRDKDSMSSDIW  | S | 456  |
| 1277 | LOC Os03g07580.1 | SPNSSAKGLRLRLSLPLHGSSLKVS  | S | 247  |
| 1282 | LOC Os03g08220.1 | SEEVPRLAASPSSGIKGGGAGERRP  | S | 61   |
| 1284 | LOC Os03g08360.1 | VSKAEFIDLARKSGKFDEDSLAFQS  | S | 150  |
| 1286 | LOC Os03g08360.1 | NRGVEPSGPDAGSPTFSVRVRRRLP  | S | 26   |
| 1292 | LOC Os03g08820.1 | IFERIDIGGSPVSAARDEKVNNDSD  | S | 392  |
| 1293 | LOC Os03g08830.1 | YTDARHGRLRLSLDLLFRSDASGSS  | S | 524  |
| 1299 | LOC Os03g10180.1 | LGQEFYKIDIFAGSEMSPRRGAAG   | S | 80   |
| 1300 | LOC Os03g10180.1 | FYKIDIFAGSEMSPRRGAAGDLDV   | S | 84   |
| 1301 | LOC Os03g10180.1 | QEFYKIDIFAGSEMSPRRGAAGDL   | S | 82   |
| 1302 | LOC Os03g10460.1 | AAPKGEIHYFRSDDEQPDSEDPD    | S | 367  |
| 1303 | LOC Os03g10510.1 | VFDVLPSTKLVTSVKLPDYNKGKVE  | S | 96   |

|      |                  |                            |   |     |
|------|------------------|----------------------------|---|-----|
| 1304 | LOC Os03g10590.1 | KWKHDLYEQTNRSPTPKTEEEQIAK  | S | 344 |
| 1305 | LOC Os03g10590.1 | RFPESRDARRPRSFFQHDERGSAGQ  | S | 138 |
| 1310 | LOC Os03g11050.1 | QKKDRANLRRVSSFEALHSATKALP  | S | 217 |
| 1311 | LOC Os03g11140.1 | RRDLSADETDFCSDDETLIEKLENN  | S | 546 |
| 1315 | LOC Os03g11220.1 | HRGRPPPQQHRPSSGGGGGGSGDL   | S | 23  |
| 1316 | LOC Os03g11220.1 | RGRPPPQQHRPSSGGGGGGSGDLA   | S | 24  |
| 1317 | LOC Os03g11240.1 | NGQNRSRFARTRSSPELTDPSVEGY  | S | 505 |
| 1321 | LOC Os03g11380.1 | LGTPVYRTNPFSDSDSEVPSRPSR   | S | 20  |
| 1322 | LOC Os03g11380.1 | TPVYRTNPFSDSDSEVPSRPSRAQ   | S | 22  |
| 1323 | LOC Os03g11500.1 | SRTAVLTASPSSSLASRRFGSRWGR  | S | 126 |
| 1325 | LOC Os03g11550.1 | LEVKRKRIERRNSLTSNISKEAVGQ  | S | 183 |
| 1326 | LOC Os03g11550.1 | PSAPPSGLFRTSSLPTVAAAAEAAKK | S | 83  |
| 1329 | LOC Os03g11580.1 | NSPLAKRANLLESKSPDGVGQTFRA  | S | 415 |
| 1330 | LOC Os03g11580.1 | KRSRGQSPQGRRSCSPLSQLSSGR   | S | 388 |
| 1332 | LOC Os03g11580.1 | NLSPEPLGAKDWSSDMPGDIIDNES  | S | 873 |
| 1336 | LOC Os03g11580.1 | SDELGHPVKEDLSGNDSDRGQQTRR  | S | 357 |
| 1338 | LOC Os03g11790.1 | MKNLQVIFPNSISFGRAELPFSMPN  | S | 315 |
| 1342 | LOC Os03g11970.1 | LDNEAIYDICKRSLDIERTYTNLN   | S | 216 |
| 1344 | LOC Os03g12010.1 | DQAGQAASSPLNSPTRGIVVDISDG  | S | 442 |
| 1345 | LOC Os03g12120.1 | KEVGPPPPPCVDSHDHDLPLAERRR  | S | 17  |
| 1346 | LOC Os03g12300.1 | RVHLKNQLQSQKSASAIVLSQEIQR  | S | 675 |
| 1347 | LOC Os03g12300.1 | HLKNQLQSQKSASAIVLSQEIQRYE  | S | 677 |
| 1349 | LOC Os03g12360.1 | TAGLIDDSPLSPSTPSPSPRPRTIV  | S | 51  |
| 1351 | LOC Os03g12450.1 | PHLLHRRDKEEASPSPPPAPAHTPA  | S | 21  |
| 1354 | LOC Os03g12450.1 | SHQRSSIHLSPOSKNQTTGALWNL I | S | 732 |
| 1358 | LOC Os03g12910.1 | PLEKFHSDVAGRSFHNGRFIQMRQ   | S | 245 |
| 1360 | LOC Os03g13560.1 | TSTMGEMANGDVSPKSSPAKQSDAV  | S | 600 |
| 1361 | LOC Os03g13560.1 | MGEMANGDVSPKSSPAKQSDAVEQK  | S | 603 |
| 1362 | LOC Os03g13560.1 | GEMANGDVSPKSSPAKQSDAVEQKP  | S | 604 |
| 1367 | LOC Os03g13720.1 | LLAMEDSNKGIIDSPSREDSSSVSHR | S | 707 |
| 1369 | LOC Os03g13790.1 | CPRGDVCLSSSSSAVNRTPGNESFS  | S | 140 |
| 1374 | LOC Os03g14260.1 | SPAAAPPPTPPESDPRLVEAFVPFL  | S | 15  |
| 1379 | LOC Os03g14710.1 | IDGVRSSRDWASGEFVPKSGGAVS   | S | 517 |
| 1384 | LOC Os03g15040.1 | GEPNQDNEPRDSSIELPRVITDMET  | S | 22  |
| 1391 | LOC Os03g15580.1 | MRNRRGVVLF AESDDDLADAHAAKD | S | 777 |
| 1393 | LOC Os03g15650.1 | EQKSQTLKASRSDVNLSLKDNFQG   | S | 304 |
| 1397 | LOC Os03g15810.1 | LPAAAGADQPRRSPQETTAAPSKPA  | S | 53  |
| 1399 | LOC Os03g15940.1 | PASEKLTPELTRSPSKAARMFSGTQ  | S | 93  |
| 1401 | LOC Os03g16369.1 | PSPHRRSHIRRKSPPFVRQSPSPH   | S | 293 |
| 1403 | LOC Os03g16369.1 | KKYPAKIDDDSESEDGSPFRKDKRK  | S | 676 |
| 1405 | LOC Os03g16369.1 | DSEHRKLTKSLNSPNKPERNSTRDS  | S | 513 |
| 1408 | LOC Os03g16369.1 | AHDDLSPGEKSPSQHSGKETRRKQN  | S | 589 |
| 1409 | LOC Os03g16369.1 | DLSPGEKSPSQHSGKETRRKQNNQL  | S | 592 |

|      |                  |                             |   |     |
|------|------------------|-----------------------------|---|-----|
| 1410 | LOC Os03g16369.1 | SPRRRSSSLDRHWSPSPGRRRPRSPS  | S | 336 |
| 1412 | LOC Os03g16369.1 | GMHNSYSKDGMSNEDA IKGLRDGMA  | S | 650 |
| 1413 | LOC Os03g16369.1 | DSSLKGTDKHLPSQVRTDSSGEEEG   | S | 536 |
| 1415 | LOC Os03g16369.1 | DKHLPSQVRTDSSGEEEGSRARENA   | S | 543 |
| 1416 | LOC Os03g16369.1 | LKLKHAETVDMASDLEKDRESDDA    | S | 789 |
| 1417 | LOC Os03g16400.1 | LDIFKGTGGDLSEDEGVVKDCHPF    | S | 312 |
| 1419 | LOC Os03g16800.1 | EEFMRDRAKRPKSPPREPEPEPVKE   | S | 363 |
| 1420 | LOC Os03g17020.1 | DDDFRPDMRRNQSVGSFGESGAESG   | S | 173 |
| 1421 | LOC Os03g17020.1 | FRPDMRRNQSVGSFGESGAESGRQP   | S | 176 |
| 1423 | LOC Os03g17020.1 | GAESGRQPPRSKSTQDMYTRQQLA    | S | 193 |
| 1427 | LOC Os03g17180.1 | NSHDSPKDQSPSEQTIDNGIPLVA    | S | 725 |
| 1428 | LOC Os03g17180.1 | IQRQSSKNSEPDSPISPLLTSDPKN   | S | 777 |
| 1432 | LOC Os03g17310.1 | QEEGKRRDGS DASGSEPAAAAFP AW | S | 18  |
| 1434 | LOC Os03g17490.1 | KSRAERFGLASSSADEDAKKKARLE   | S | 113 |
| 1435 | LOC Os03g17540.1 | WKDKKGLATKLYSFKHDPLCPQVNS   | S | 395 |
| 1437 | LOC Os03g17950.1 | TPSEPIVPIRRSSFSYTPSRSLGQS   | S | 171 |
| 1440 | LOC Os03g18070.1 | WALRV SAPTRLTSVVEEDNRGEEVV  | S | 64  |
| 1442 | LOC Os03g18310.1 | EQRAIFVDRGVGSPEFARPTNETIS   | S | 194 |
| 1443 | LOC Os03g18454.1 | TDCYKGERGHQLSLKYGRQTDALQP   | S | 165 |
| 1444 | LOC Os03g19040.1 | KPPGTTTTTTTTTRSPPPPLPVTKVGG | S | 53  |
| 1447 | LOC Os03g19340.1 | ECSTQDREGLALSPTNREAVETKPN   | S | 946 |
| 1449 | LOC Os03g19520.1 | EEENKHVWARKNSAYFSKLVFSFTD   | S | 587 |
| 1450 | LOC Os03g19530.1 | AKAVDAGMMEYDSDDNPIVVDKKKI   | S | 151 |
| 1452 | LOC Os03g19530.1 | ALAADAMHAGYDSDEEVYAAAKAVD   | S | 131 |
| 1455 | LOC Os03g19590.1 | HAVFEQSGASGRSFDYTQSLRASPT   | S | 84  |
| 1459 | LOC Os03g19870.1 | KGKSEELADSIGLSIGPERTNFKK    | S | 39  |
| 1461 | LOC Os03g19990.1 | TADPMSLPLFLHSVRPYGDI FTVDI  | S | 640 |
| 1462 | LOC Os03g20340.1 | SVGVVGGGGGAGSPPGSPGRSLSPR   | S | 59  |
| 1464 | LOC Os03g20530.1 | VASEKLASENSVSFSRKQENSDFS    | S | 299 |
| 1465 | LOC Os03g20600.1 | AVGQLGCIRKSWSNDSLSSYGGGGR   | S | 40  |
| 1471 | LOC Os03g21140.1 | HPLQGFDAECRSPGPGEGGGMFPY    | S | 192 |
| 1473 | LOC Os03g21160.1 | HQLGARM LQHSNSANELMLRRKLEE  | S | 479 |
| 1474 | LOC Os03g21160.1 | DFHQLGARM LQHSNSANELMLRRKL  | S | 477 |
| 1477 | LOC Os03g21160.1 | HALQAFDGAECRSPGPGESGGMLPY   | S | 190 |
| 1480 | LOC Os03g21160.1 | YRKQQQGD FCCMSPTGLDARDPFD   | S | 454 |
| 1486 | LOC Os03g21530.1 | AKFDAEYDGS DLSGEEVDNDTKKSK  | S | 726 |
| 1487 | LOC Os03g21540.1 | SSAKSHTTGSHASSLP SNLCRHFSF  | S | 518 |
| 1488 | LOC Os03g21800.1 | SSPPRPKHRHSSSV DSGGFFAAARK  | S | 92  |
| 1489 | LOC Os03g21940.1 | KSKAEKAREKTLSDQFEAKRAKSKA   | S | 156 |
| 1491 | LOC Os03g22340.1 | TVSRDKTKVTVTSDGPF SKRYLKYL  | S | 77  |
| 1494 | LOC Os03g22350.1 | SDYVTKAGYGSESEVDDEAATVSLA   | S | 265 |
| 1495 | LOC Os03g22350.1 | NQVPDLRDLNDVSDYVTKAGYGSES   | S | 253 |
| 1496 | LOC Os03g22580.1 | SRRNKNSREAKGSPVESVSSSPLKN   | S | 447 |

|      |                  |                            |   |     |
|------|------------------|----------------------------|---|-----|
| 1501 | LOC Os03g22740.1 | EKKEKKKKKSDSQDAEDVAMETEE   | S | 540 |
| 1506 | LOC Os03g23970.1 | EELRGGSAYGADSLCIGVARLGSD   | S | 218 |
| 1507 | LOC Os03g24050.1 | TSSLFARRAGDPSAAIAGFQRRLYG  | S | 34  |
| 1508 | LOC Os03g24180.1 | DLYDYKVVHADDSDAERSEDAKAAE  | S | 464 |
| 1511 | LOC Os03g24339.1 | TPAFKEGSQKQLSPLNRIIRSTSTN  | S | 857 |
| 1512 | LOC Os03g24339.1 | ELNHRNLKDKSTSPDSMPMKELIAV  | S | 804 |
| 1515 | LOC Os03g24890.1 | RSASPDELERHVSNSNNGHGPPVDG  | S | 229 |
| 1516 | LOC Os03g24890.1 | ASPDELERHVSNSNNGHGPPVDGKS  | S | 231 |
| 1518 | LOC Os03g24890.1 | YRDHRDDYSPGESLSPHGQDKRHHR  | S | 201 |
| 1520 | LOC Os03g24890.1 | RSVSRSPRSRYHSYSPSPSPARRDY  | S | 177 |
| 1523 | LOC Os03g24890.1 | GQDKRHHRNSGRSASPDELERHVSP  | S | 218 |
| 1524 | LOC Os03g24890.1 | DKRHHRNSGRSASPDELERHVSPSN  | S | 220 |
| 1526 | LOC Os03g24930.1 | FRKLSSMTNSPASSVAGAAEGGKDD  | S | 64  |
| 1531 | LOC Os03g25450.1 | SAYADGEVKAELSDGEKGGSEKKKK  | S | 545 |
| 1532 | LOC Os03g25464.1 | HVSTSQADDICILSSMSRISIPAQTK | S | 30  |
| 1533 | LOC Os03g25600.1 | AAAMAGLQRPSKSFSETTFRTISGA  | S | 113 |
| 1535 | LOC Os03g25620.1 | QFDLLALEEYGDSDDDDDDPGVRNG  | S | 263 |
| 1537 | LOC Os03g25720.1 | AGASSAASADGASPRGRGGGGGGLA  | S | 64  |
| 1538 | LOC Os03g25890.1 | AISNVIIGGIEDSDDVKTYLENIDR  | S | 18  |
| 1539 | LOC Os03g25970.1 | GGYGAYGGYSGRSGSSGLSGPSSFS  | S | 523 |
| 1543 | LOC Os03g26460.1 | DLEDDDEDDTADSANKDDEDIKAEG  | S | 236 |
| 1544 | LOC Os03g26630.1 | EKLNLDRSSGDESMEEDVMEIKQVE  | S | 380 |
| 1547 | LOC Os03g26630.1 | GGSPEKLNLDRSSGDESMEEDVMEI  | S | 376 |
| 1549 | LOC Os03g26630.1 | NDQVPEVSPDLGSPKCESISSDDI   | S | 283 |
| 1551 | LOC Os03g26630.1 | TAELSSDHVKEVSLPDTVVDNSSVD  | S | 412 |
| 1552 | LOC Os03g27030.1 | RYQEKGYRRRSRSISPDYDRRHRKN  | S | 178 |
| 1553 | LOC Os03g27030.1 | QEKGYRRRSRSISPDYDRRHRKNGR  | S | 180 |
| 1555 | LOC Os03g27080.1 | AAARIFQAFRVESFHRKKVVEYGDD  | S | 330 |
| 1556 | LOC Os03g27460.1 | EVRGININEEAQSTDGATRGHVHAR  | S | 351 |
| 1558 | LOC Os03g27460.1 | RQPQNGSARGGSSRGVRVKKTTARKK | S | 288 |
| 1560 | LOC Os03g27800.1 | HVANPWTAPPIRSPEQKGSYKEDDA  | S | 721 |
| 1562 | LOC Os03g27840.1 | TSDLKVAGISPPSSPIRVGIPNRSS  | S | 363 |
| 1565 | LOC Os03g27840.1 | EYITEFGGSDDTSDLKVAGISPPSS  | S | 352 |
| 1567 | LOC Os03g27840.1 | YRDPYREQRRSPSYDSYSRGRRSRS  | S | 295 |
| 1571 | LOC Os03g27990.1 | EKNEPLTLRPIASGKFNLRTISII   | S | 371 |
| 1572 | LOC Os03g28330.1 | FNASFPRPSLSKISIGNVQFLNRHL  | S | 157 |
| 1576 | LOC Os03g29750.1 | SCVMLPKSDSFVSVSEYQHPLTEDM  | S | 420 |
| 1577 | LOC Os03g30460.1 | VNDEYMKLTLETLSRKIKFIEVDAMV | S | 189 |
| 1579 | LOC Os03g30790.1 | RTPPPSPSPSLSLRSQQQTTPRGR   | S | 25  |
| 1581 | LOC Os03g30790.1 | PPSPSPSLSLRSQQQTTPRGRQPPP  | S | 29  |
| 1584 | LOC Os03g30790.1 | PSLHRTPPPPSPSPSLSLRSQQQT   | S | 21  |
| 1586 | LOC Os03g31730.1 | SSCKDVHVTTDVSPGISPKGDIPSD  | S | 601 |
| 1588 | LOC Os03g31750.1 | AAGILTARGGMTSHAAVVARGWGKC  | S | 468 |

|      |                  |                            |   |      |
|------|------------------|----------------------------|---|------|
| 1594 | LOC Os03g35340.1 | ESNIPSERKFSVSSPEKVMFPDHAD  | S | 1719 |
| 1606 | LOC Os03g40010.1 | DGNKDEAEVEEVSEADKKVEENKEE  | S | 250  |
| 1607 | LOC Os03g40010.1 | EKQGEAAEKEGSADNDNEEGDKNA   | S | 212  |
| 1610 | LOC Os03g40010.1 | NKGSGENGTGKPSDGDVEMAEAEATA | S | 66   |
| 1611 | LOC Os03g40010.1 | NDNEEGDKNANISDEHLKKDGGKDG  | S | 227  |
| 1614 | LOC Os03g40110.1 | DDYSDEEGHMILSKNRIPLQSGDVP  | S | 189  |
| 1617 | LOC Os03g40110.1 | ERQKRMLGTAESSDEDDDDDEEGDR  | S | 329  |
| 1618 | LOC Os03g42220.1 | KVKIYGARVRVDSMAKVAEIEAAEK  | S | 253  |
| 1621 | LOC Os03g43180.1 | PTVAMEGGGDGYSGGAARLERRRRR  | S | 93   |
| 1622 | LOC Os03g43390.1 | GGGEGTKLRRALSFEDAATASASAT  | S | 73   |
| 1627 | LOC Os03g43800.1 | QVDADFPEGLSGSREAETGDYPKYA  | S | 382  |
| 1628 | LOC Os03g43800.1 | SAQIKDENKDNDSDKPSMPAAVSV   | S | 522  |
| 1629 | LOC Os03g43800.1 | QTPGRSGDRMFLSPVKSTDRKNADS  | S | 347  |
| 1634 | LOC Os03g44310.1 | PPPRHADHLAPGSPSPAASPSELGD  | S | 98   |
| 1635 | LOC Os03g44310.1 | ASPSELGDDESWSRAPSAAELESNN  | S | 115  |
| 1637 | LOC Os03g44310.1 | ELGDDESWSRAPSAAELESNNNDLA  | S | 119  |
| 1638 | LOC Os03g44310.1 | SWSRAPSAAELESNNNDLAEIRNDN  | S | 125  |
| 1640 | LOC Os03g44484.1 | PNRENTMGMRHGSYDKLDDGLAPP   | S | 193  |
| 1642 | LOC Os03g44500.1 | ATAARKLLDRQMSINSVPKKVIASL  | S | 643  |
| 1645 | LOC Os03g44830.1 | QDPRFPGRARTLSSAGTEPTAREAS  | S | 305  |
| 1651 | LOC Os03g45300.1 | EVSPVAAGSGEDSGRGRRAVTRV    | S | 141  |
| 1653 | LOC Os03g46040.1 | PQAPLVPILRTPSGEVVYGITDDPV  | S | 171  |
| 1655 | LOC Os03g46340.1 | DNSPPLTKHVDASDDVDKACVSDS   | S | 413  |
| 1656 | LOC Os03g46340.1 | EERSESCSGTDNSPPLTKHVDASDD  | S | 403  |
| 1657 | LOC Os03g46340.1 | MLKLQSEEKVISLSKEKDQLKER    | S | 293  |
| 1658 | LOC Os03g46480.1 | GDADEDAEPEQPSSPSVKKAAEEKGI | S | 241  |
| 1660 | LOC Os03g46480.1 | DEDAEPEQPSSPSVKKAAEEKGIVVV | S | 244  |
| 1661 | LOC Os03g46590.1 | DGEGPSAEVNETSVEEVNAREDRGV  | S | 134  |
| 1662 | LOC Os03g46600.1 | DGAVKSTTGRLPSPSLLGRYPSLEE  | S | 48   |
| 1665 | LOC Os03g46710.1 | GDGMQTKFSRRESLDPELPGASSSS  | S | 174  |
| 1667 | LOC Os03g46710.1 | DLETEQSESKVPSPQHRSTRTEDEI  | S | 554  |
| 1668 | LOC Os03g46920.1 | SSSLSSGYGRRKSAKEDESLSLDPV  | S | 706  |
| 1675 | LOC Os03g47930.1 | VHSPVSTTNLSKSQSFDSPTTEKELT | S | 146  |
| 1677 | LOC Os03g47930.1 | RILGEENKGMESPDRDQIDRYITS   | S | 574  |
| 1679 | LOC Os03g48600.1 | EITEYRQSQPRRSaelQGIAREAMS  | S | 263  |
| 1681 | LOC Os03g48600.1 | PVQCRVTSLENMSPSESEPQRTLLSR | S | 186  |
| 1683 | LOC Os03g49170.1 | NGEELGKLRRSSSFELRSGGDDPDL  | S | 678  |
| 1691 | LOC Os03g49640.1 | RTDDERVDASHMSDTEEEEFADeg   | S | 312  |
| 1692 | LOC Os03g49770.1 | SSFKSSGSDfQRSEAGSDDEDdYPM  | S | 381  |
| 1694 | LOC Os03g49770.1 | ENIYFDTRDFLSSSSFKSSGSDfQR  | S | 368  |
| 1695 | LOC Os03g49770.1 | IYFDTRDFLSSSSFKSSGSDfQRSE  | S | 370  |
| 1696 | LOC Os03g50120.1 | SFDDSFdREDDGSDPDEGERRRAKV  | S | 427  |
| 1701 | LOC Os03g50300.1 | PKKYAEDVESGSSDVETKYKKMYED  | S | 566  |

|      |                  |                           |   |      |
|------|------------------|---------------------------|---|------|
| 1702 | LOC Os03g50300.1 | SRGPKKYAEDVESGSSDVETKYKKM | S | 563  |
| 1705 | LOC Os03g50330.1 | LLNHKSAEDPDGSFYTGDDPDRSFY | S | 49   |
| 1709 | LOC Os03g50390.1 | PRKRVPADIKSFSHELNSKGVPRFP | S | 277  |
| 1711 | LOC Os03g50390.1 | DEEDDVVRSLRASPVHPVKDRTSID | S | 839  |
| 1713 | LOC Os03g50390.1 | SYTQKDLPNAVGSPDVAKVSNSIN  | S | 637  |
| 1715 | LOC Os03g50730.1 | ANGGGKKLEKEDSLDWERYMKENG  | S | 170  |
| 1716 | LOC Os03g50810.1 | YKRKQKPFGRVQSPHAMVVHPRHSG | S | 538  |
| 1718 | LOC Os03g51000.1 | RPPAKIPVPVPPSPSGKDDEILTEP | S | 392  |
| 1719 | LOC Os03g51020.1 | PDDPFVEDDQHGVSRSIGVGISSDA | S | 550  |
| 1725 | LOC Os03g51020.1 | VAEPKEDDEQDGSEAGSNAGPRGAA | S | 56   |
| 1726 | LOC Os03g51020.1 | KEDDEQDGSEAGSNAGPRGAASVRS | S | 60   |
| 1727 | LOC Os03g51030.1 | ADSCHRQLNKILSDLDQDSVMNKSS | S | 951  |
| 1729 | LOC Os03g51140.1 | AGTSGKAILEGGSDDEGASTEAHGR | S | 399  |
| 1731 | LOC Os03g51250.1 | AAPEKTSRAGSFSFKSGPPKLELQM | S | 327  |
| 1735 | LOC Os03g51520.1 | ESFVKQAEEDPMSDDENHEDSRRGR | S | 1230 |
| 1737 | LOC Os03g51520.1 | ISRAEQPTGHNSSDQDELRTNSDN  | S | 767  |
| 1739 | LOC Os03g51600.1 | ALEKDYEEVGAESDENEDGDDGDEY | S | 439  |
| 1740 | LOC Os03g51790.1 | KRSSPTASPPADSDDEGSPRGLSLL | S | 54   |
| 1741 | LOC Os03g52310.1 | FAYSSGSKIAGTSHLKRHITLGSCP | S | 108  |
| 1742 | LOC Os03g52310.1 | CCKLCKQTFAYSSGSKIAGTSHLKR | S | 100  |
| 1745 | LOC Os03g52700.1 | PGKGVSRWRSDESSEDEDDKRTSGY | S | 885  |
| 1746 | LOC Os03g52700.1 | GKGVSRWRSDESSEDEDDKRTSGYM | S | 886  |
| 1748 | LOC Os03g52794.1 | ETSAKSMLAEASSLAEKSRTSFELH | S | 2695 |
| 1749 | LOC Os03g52970.1 | EGVRSIVLKPESLDEGRFTRIAGA  | S | 28   |
| 1752 | LOC Os03g53280.1 | DLTLPKFGDDMSSIGSHGDLDDFSA | S | 1524 |
| 1755 | LOC Os03g53280.1 | NMNRTASYASGISPESSLDLTLPK  | S | 1505 |
| 1756 | LOC Os03g53280.1 | SYSDGRQLTASPSMSSTISGIDLDS | S | 2111 |
| 1757 | LOC Os03g53280.1 | TERKDLDAADFASFKEDDIFKGG   | S | 2668 |
| 1761 | LOC Os03g53630.1 | ANGDELSMGLSRASGRESIEQEDT  | S | 63   |
| 1762 | LOC Os03g53630.1 | GDELSMGLSRASGRESIEQEDTVM  | S | 65   |
| 1764 | LOC Os03g53630.1 | LTDCTNQKKGIDSPVNETKGDSTPD | S | 125  |
| 1765 | LOC Os03g53670.1 | KRAKQQLLQGGSLDNASHEKEKNA  | S | 610  |
| 1766 | LOC Os03g53670.1 | GSASAGDAQNAASPVDRSITPLLQE | S | 54   |
| 1767 | LOC Os03g53880.1 | FLIQKNILKRPRSPGDHGLAVGNF  | S | 91   |
| 1773 | LOC Os03g54780.1 | QQQNSRRKPSVSSVPESVTREDPST | S | 247  |
| 1774 | LOC Os03g54780.1 | HPDMQEAKTMPSTGTVKKLKVAEG  | S | 662  |
| 1777 | LOC Os03g55300.1 | HLAGGNKAKALLSDGDDDGELGQRM | S | 172  |
| 1779 | LOC Os03g55330.1 | GTVARRQAGPADSPAESYLESRVSF | S | 119  |
| 1781 | LOC Os03g55570.1 | HIWPLNSDGPVTSASPERSTPKEKP | S | 220  |
| 1784 | LOC Os03g55704.1 | EAERVSSMGRKVSFSMEDSRLCRNS | S | 826  |
| 1785 | LOC Os03g55704.1 | HVVSFDAAVRSVSQELEHGKDFTEE | S | 700  |
| 1786 | LOC Os03g56060.1 | LAPKELKHQKTESAPNLDAIAKEQS | S | 382  |
| 1788 | LOC Os03g56460.1 | DQWGVELGKSLASQVRKSLHASRVE | S | 520  |

|      |                  |                            |   |     |
|------|------------------|----------------------------|---|-----|
| 1789 | LOC Os03g56800.1 | DGHRVKKYRGMGSLEAMTKGSDARY  | S | 405 |
| 1790 | LOC Os03g56900.1 | MDTIAENLPKQKSGKFDVGAASDKM  | S | 29  |
| 1792 | LOC Os03g57160.1 | KIYGSTKADSVESEKIGGHAVGHA   | S | 776 |
| 1793 | LOC Os03g57160.1 | LGQAQNHAMRSDSAASLYMDDHVTP  | S | 914 |
| 1795 | LOC Os03g57160.1 | LGRDLMIGQPTGSEVGDHATSYESR  | S | 457 |
| 1801 | LOC Os03g57310.1 | LDDIETHVGRARSFVDRGREQLVVA  | S | 262 |
| 1802 | LOC Os03g57430.1 | LRKDGSSKLLSHSFKDLGNKDIRSD  | S | 344 |
| 1803 | LOC Os03g57430.1 | SVKHSLDPELNGSPSSKDKLRKDGS  | S | 325 |
| 1804 | LOC Os03g57430.1 | KHSLDPELNGSPSSKDKLRKDGS SK | S | 327 |
| 1805 | LOC Os03g57430.1 | HSLDPELNGSPSSKDKLRKDGS SKL | S | 328 |
| 1806 | LOC Os03g57430.1 | SRTIGSDLTDGGSPIRDS PSSKRL  | S | 204 |
| 1810 | LOC Os03g57430.1 | ISSDNVLAAS PQSNKMAEKIFEQLN | S | 249 |
| 1813 | LOC Os03g58250.1 | KIGRTASLQRVASLEHLQKRMCGGP  | S | 406 |
| 1814 | LOC Os03g58480.1 | TRAKSPKFTRRRSCSDAPPTPEAAN  | S | 306 |
| 1815 | LOC Os03g58480.1 | AKSPKFTRRRSCSDAPPTPEAANTT  | S | 308 |
| 1816 | LOC Os03g58480.1 | KLIDQEKSGPPKSPSKPGISGSDRS  | S | 110 |
| 1817 | LOC Os03g58480.1 | IDQEKSGPPKSPSKPGISGSDRSKR  | S | 112 |
| 1819 | LOC Os03g58590.1 | LRKHLHRLEHPDSIEQDKESEDEID  | S | 408 |
| 1820 | LOC Os03g58740.1 | PKPAPSRLESSLSFSAPLHKVEGRA  | S | 254 |
| 1821 | LOC Os03g58810.1 | PPKVNIIDLESSASKHRRKMRKVDGG | S | 553 |
| 1822 | LOC Os03g58810.1 | FKNPPKVNIIDLESSASKHRRKMRKV | S | 550 |
| 1824 | LOC Os03g59250.1 | TEPFVSDNRHMSLSPEKDRYYSTR   | S | 92  |
| 1825 | LOC Os03g59250.1 | PFVSDNRHMSLSPEKDRYYSTRGS   | S | 94  |
| 1826 | LOC Os03g59340.1 | KIAERMLTWRMNSGRNDDIVH SKYD | S | 112 |
| 1829 | LOC Os03g59390.1 | SRQYSRQRF SNLSLKLQKDGSISDD | S | 524 |
| 1830 | LOC Os03g59480.1 | GSKDLDKELLENSQDNLEDKAQSSD  | S | 370 |
| 1831 | LOC Os03g59480.1 | DFLDVEAEEDDSDDMMRFKDNEE    | S | 463 |
| 1834 | LOC Os03g59680.1 | FKDLSCTPSRSISPEDDAGVEGSGH  | S | 49  |
| 1835 | LOC Os03g59760.1 | DDDDDEDEDDEDS DHELEDLFRQR  | S | 96  |
| 1836 | LOC Os03g60110.1 | LYSPGFSPARNLSPQIRS NPTDVDS | S | 16  |
| 1838 | LOC Os03g60240.1 | DNSRHDVQLQSSSPCREELETVKAP  | S | 929 |
| 1840 | LOC Os03g60460.1 | QVGRMKYL RPLYSSLARCSGEEKML | S | 571 |
| 1842 | LOC Os03g60530.1 | FFSIARDIKQRLSETDSKPEDRTIK  | S | 182 |
| 1844 | LOC Os03g61010.1 | GIQHDKENTERISLSAIAKVYARAD  | S | 335 |
| 1847 | LOC Os03g61160.1 | GDEKKVRLMRNRSLTREEVD AFWRR | S | 26  |
| 1849 | LOC Os03g61160.1 | PRAAGDISPLAASPGRAQQEMSSSR  | S | 88  |
| 1853 | LOC Os03g61220.1 | GGGSRGGRGGWSDGEDRFRRGGRS   | S | 670 |
| 1859 | LOC Os03g61930.1 | GTSSVLEPEVELSHDGKIREIAMDS  | S | 510 |
| 1860 | LOC Os03g61930.1 | KSDLQSKTKEHASDGTSSVLEPEVE  | S | 496 |
| 1864 | LOC Os03g62340.1 | SFGAKGLIRRSSFSSDIQKDV SVC  | S | 426 |
| 1867 | LOC Os03g63320.1 | AARARVSGSRDASGDESDGVADWGL  | S | 168 |
| 1868 | LOC Os03g63320.1 | RVSGSRDASGDESDGVADWGLPNGR  | S | 172 |
| 1869 | LOC Os03g63320.1 | EAEAHHYYDDADQSDSAAAAAARARV | S | 149 |

|      |                  |                            |   |     |
|------|------------------|----------------------------|---|-----|
| 1871 | LOC Os03g63650.1 | ESFYSQLVGSTRGSPAATPSPAPLTP | S | 175 |
| 1872 | LOC Os03g63670.1 | NPSQNEDEKDEDESEEEEEEEGPVI  | S | 216 |
| 1874 | LOC Os03g63670.1 | NEHIEGELSTDESDSESSAYLSSRD  | S | 619 |
| 1875 | LOC Os03g63670.1 | HIEGELSTDESDSESSAYLSSRDEL  | S | 621 |
| 1876 | LOC Os03g63940.1 | MDVDNDFQRTVSLSDGIIQEGPQR   | S | 136 |
| 1877 | LOC Os03g63940.1 | VDNDNDFQRTVSLSDGIIQEGPQRIS | S | 138 |
| 1878 | LOC Os03g63940.1 | LTRDFDQINTILSPSTPGSRMNMDV  | S | 114 |
| 1879 | LOC Os03g64210.1 | IQARIAQLKRELSQTDSAYDSEKLA  | S | 394 |
| 1880 | LOC Os03g64210.1 | PRGRNVVLDEFGSPKVVNDGVTIAR  | S | 86  |
| 1882 | LOC Os03g64400.1 | DSSPSPDAFAGWSDGDEQDEQDKSP  | S | 56  |
| 1883 | LOC Os04g01480.1 | GAQHMPWKTSLSFFRRRAASSADG   | S | 58  |
| 1885 | LOC Os04g01490.1 | VKFFNARISRTSSLPVTDVSEQAD   | S | 156 |
| 1886 | LOC Os04g01490.1 | KLNNKSFKRMNSLGGVYRVVPSTP   | S | 206 |
| 1890 | LOC Os04g02000.1 | DTSSTLGTKRLLASEELANEWDNKRL | S | 231 |
| 1891 | LOC Os04g02150.1 | SDDIEAMKRDGVSGDEIVEALIAN   | S | 148 |
| 1894 | LOC Os04g02870.1 | GYGRRDDSPYRRSVSPVYRSRPSD   | S | 192 |
| 1895 | LOC Os04g02870.1 | GRRDDSPYRRSVSPVYRSRPSPDY   | S | 194 |
| 1899 | LOC Os04g04680.1 | GTIARTRTKPVLSLSKRRPQLEHEP  | S | 37  |
| 1901 | LOC Os04g06770.1 | TFLKFEDMSDASSSQGGHTSVGSVP  | S | 881 |
| 1908 | LOC Os04g08740.1 | PVAAIRMPMLKASNFKGGTPEVMET  | S | 291 |
| 1909 | LOC Os04g08740.1 | VMQTSTVNREYLSLVRRAFNLHSLV  | S | 443 |
| 1910 | LOC Os04g14510.1 | AIHKDKNYVRTLSICGDKVDGVEHS  | S | 219 |
| 1915 | LOC Os04g17700.1 | RPAGPLPSDVEDSDSNAGDGAGEA   | S | 56  |
| 1916 | LOC Os04g17700.1 | GPLPSDVEDSDSNAGDGAGEALRK   | S | 59  |
| 1919 | LOC Os04g18090.1 | GASLPANYKKMLSIQLRGFASKGKL  | S | 80  |
| 1920 | LOC Os04g21220.1 | LLLTFRPGPSQRSLSLFAGSVWGFQ  | S | 292 |
| 1921 | LOC Os04g24170.1 | LETEVLQSQQVSSPAQSKTGSSVHE  | S | 458 |
| 1923 | LOC Os04g24210.1 | KFVSQGLGVMSTSRPMDLYCDNSGA  | S | 622 |
| 1925 | LOC Os04g25550.1 | ASCSKLVKDVAYSFNDEDEVLPVKK  | S | 446 |
| 1927 | LOC Os04g28090.1 | GSTATRALLSSYSQTPRLGMTPLRT  | S | 340 |
| 1929 | LOC Os04g28180.1 | RTLDSHIEEQFGSGRLLACISSRPG  | S | 177 |
| 1935 | LOC Os04g31090.1 | VEDLWEVAEPQLSPSEKLNCFEDI   | S | 111 |
| 1936 | LOC Os04g31190.1 | GSSSSKSVARVHSLDNLISTIQLRE  | S | 607 |
| 1937 | LOC Os04g31330.1 | SKNAADDMIRILSGFDHRFSSITAD  | S | 59  |
| 1939 | LOC Os04g31330.1 | GLFCSLRRLSLESMDLDLTSSEFDP  | S | 194 |
| 1940 | LOC Os04g31340.1 | GSPVANLVSRLGSFTFRRTSSGRVE  | S | 137 |
| 1941 | LOC Os04g32920.1 | ATATASRLKRHDSLFGDAEKVSGGK  | S | 31  |
| 1945 | LOC Os04g33110.1 | THAGSFKRLHRSSSHGHPSSSPTA   | S | 77  |
| 1947 | LOC Os04g33110.1 | CRLHRSSSHGHPSSSPTAAAAPAAA  | S | 84  |
| 1948 | LOC Os04g33110.1 | HSSGTTPTGAAASPKMRRSWSSAAS  | S | 33  |
| 1952 | LOC Os04g34450.1 | KSLRLITDASVSSPVSREKAQGLDP  | S | 205 |
| 1958 | LOC Os04g35700.1 | AGAASAASSPRKSLDLVLSASPSV   | S | 34  |
| 1961 | LOC Os04g35700.1 | RTNMSLPVSPCSSPLRQFKQSNWSC  | S | 642 |

|      |                  |                           |   |      |
|------|------------------|---------------------------|---|------|
| 1962 | LOC Os04g35700.1 | ISVVRTNMSLPVSPCSSPLRQFKQS | S | 638  |
| 1963 | LOC Os04g35800.1 | PSPPLPPRKRRLSPTSPTRRSSRS  | S | 54   |
| 1964 | LOC Os04g35800.1 | LPPRKRRLSPTSPTRRSSRSRSRS  | S | 58   |
| 1969 | LOC Os04g36790.1 | QMELSQVKDHSSSPANAAAPPGATG | S | 326  |
| 1970 | LOC Os04g36790.1 | PGGGGGGREDAWSEGATAALIDAWG | S | 69   |
| 1974 | LOC Os04g37540.1 | SNPASVPLGRSYSVEPLRKPIVNQK | S | 382  |
| 1976 | LOC Os04g37950.1 | DILEKESNAAKDSPQSSSPEKVPNG | S | 140  |
| 1980 | LOC Os04g38570.1 | SLSLRSGSLRNLSYSYSTGADGRIE | S | 650  |
| 1987 | LOC Os04g39040.1 | PSGFPGGGGGGSDSDEPQEYYTGG  | S | 46   |
| 1989 | LOC Os04g39040.1 | TIRTLADISRGPSGFPGGGGGGSD  | S | 35   |
| 1990 | LOC Os04g39090.1 | TSALPSRIPSARSMDDLKLDSSRE  | S | 174  |
| 1995 | LOC Os04g39629.1 | YMYDREAAGTDSASDIDRHDDTGA  | S | 357  |
| 1996 | LOC Os04g39629.1 | YDREAAGTDSASDIDRHDDTGAAR  | S | 359  |
| 1999 | LOC Os04g40080.1 | AIVAATDAEAGGSRRVPEGDLEACR | S | 56   |
| 2000 | LOC Os04g40400.1 | PQIVVSIVDRPRSRGMEFPKPAE   | S | 491  |
| 2003 | LOC Os04g40430.1 | SLPREPKPEIDDSDNSDDPDFWVPP | S | 185  |
| 2009 | LOC Os04g40720.1 | CCRDTSMEDRGKSSEGCPGAEVHVD | S | 127  |
| 2011 | LOC Os04g40720.1 | KDKGTGTIFNDASSDGSDELGIGS  | S | 1299 |
| 2012 | LOC Os04g40720.1 | TGTIFNDASSDGSDELGIGSEKAA  | S | 1303 |
| 2013 | LOC Os04g40720.1 | DKGTGTIFNDASSDGSDELGIGSE  | S | 1300 |
| 2014 | LOC Os04g40720.1 | EPNEKINFLDHFSPKGTNDQYVSAE | S | 1015 |
| 2016 | LOC Os04g40720.1 | KYPAAIHSDAPISSPSHNKARGEKL | S | 748  |
| 2017 | LOC Os04g40720.1 | YPAAIHSDAPISSPSHNKARGEKLE | S | 749  |
| 2018 | LOC Os04g40720.1 | AAIHSDAPISSPSHNKARGEKLEVL | S | 751  |
| 2023 | LOC Os04g41030.1 | IPDSLGRDLRLKSLDLSDNRLDGQI | S | 178  |
| 2025 | LOC Os04g41030.1 | KGGRRRRRRGGSESGGSAEDGSWWA | S | 267  |
| 2026 | LOC Os04g41100.1 | SRDGESVVAASASSPSKKRKFSPII | S | 131  |
| 2027 | LOC Os04g41100.1 | RDGESVVAASASSPSKKRKFSPIIW | S | 132  |
| 2028 | LOC Os04g41100.1 | GESVVAASASSPSKKRKFSPIIWR  | S | 134  |
| 2032 | LOC Os04g41100.1 | QDHIPERLAVEKSPMDVEPAVASES | S | 193  |
| 2038 | LOC Os04g41100.1 | QSGMDSEYEVRRSETPEPVKPPHRC | S | 340  |
| 2039 | LOC Os04g41100.1 | ASASSPSKKRKFSPIIWDRDSPKPM | S | 140  |
| 2040 | LOC Os04g41160.1 | PSPPEPALPRELSLGLRAVSMLGR  | S | 20   |
| 2041 | LOC Os04g41820.1 | SLSSRDVAAMPDSPPRRAARHRAQ  | S | 131  |
| 2046 | LOC Os04g42140.1 | LDNDNWEVPRSKSMRGLSLRNQGP  | S | 529  |
| 2047 | LOC Os04g42320.1 | DHNLKKS HKLDTSTDSEVVDHSAV | S | 393  |
| 2048 | LOC Os04g42320.1 | LKKSHKLDTSTDSEVVDHSAVNNN  | S | 396  |
| 2049 | LOC Os04g42320.1 | NNNEDILVSRELSPETDDGDNKLPP | S | 418  |
| 2053 | LOC Os04g42320.1 | DTPPDEDTDEDLSLKDIVSPKSSAK | S | 539  |
| 2054 | LOC Os04g42320.1 | DTDEDLSLKDIVSPKSSAKTGKNKG | S | 545  |
| 2059 | LOC Os04g43130.1 | AGTDGCITSPMQSSSPKVRPDQEYL | S | 345  |
| 2060 | LOC Os04g43140.1 | RNAESMGLLLETSDSEEERVQGHKQ | S | 688  |
| 2061 | LOC Os04g43140.1 | AESMGLLLETSDSEEERVQGHKQRK | S | 690  |

|      |                  |                            |   |      |
|------|------------------|----------------------------|---|------|
| 2063 | LOC Os04g43300.1 | ANDDNRELKRQKSTDQDDRQPAVAG  | S | 234  |
| 2065 | LOC Os04g44640.1 | GGGHRYSKSKRSYDFDRERRGGGG   | S | 165  |
| 2066 | LOC Os04g44740.1 | SFGIHLWNRESRSLEMEEGSVIGRL  | S | 435  |
| 2068 | LOC Os04g44800.1 | GEAAAAVAARSRSKSIEADEEERSK  | S | 25   |
| 2070 | LOC Os04g45190.1 | QPPRPPSPVREGSEEGSSPRASLSE  | S | 141  |
| 2073 | LOC Os04g45190.1 | ATRAHKDAEDVTSDSETSALISRLT  | S | 186  |
| 2074 | LOC Os04g45190.1 | RAHKDAEDVTSDSETSALISRLTEE  | S | 188  |
| 2079 | LOC Os04g45800.1 | SRQKHLVFDNKDSKKAKNNEQKNDV  | S | 62   |
| 2083 | LOC Os04g46320.1 | SSPNARDIHLPSFKDLVLERKISD   | S | 307  |
| 2087 | LOC Os04g47380.1 | GSTDDDKQILSESDAFINKNLEGIQ  | S | 99   |
| 2088 | LOC Os04g47700.1 | CANFAPVSEKRNSSIKDDENIELDI  | S | 613  |
| 2089 | LOC Os04g47700.1 | ANFAPVSEKRNSSIKDDENIELDID  | S | 614  |
| 2090 | LOC Os04g47870.1 | AFRARFYMEPETSDSGSMASGAATS  | S | 1071 |
| 2092 | LOC Os04g47912.1 | NPCEAYCGRSTSSSLDEFEVRSAMAV | S | 207  |
| 2095 | LOC Os04g49060.1 | VLLQDRVAELIGSCSPGNQFNDADS  | S | 164  |
| 2096 | LOC Os04g49060.1 | LQDRVAELIGSCSPGNQFNDADSSD  | S | 166  |
| 2098 | LOC Os04g49510.1 | DTDDNNNAAAADSPKKPSRPPAAAK  | S | 37   |
| 2101 | LOC Os04g49520.1 | IMMNGYAKQGSLSDAEELFDRMPRR  | S | 88   |
| 2103 | LOC Os04g50204.1 | GSHKEESNVKGDSEDEPVMVAKM    | S | 674  |
| 2105 | LOC Os04g51040.1 | LEALRRLMKQHLCLKSEKALRELME  | S | 695  |
| 2112 | LOC Os04g51120.1 | VETAAKDPFDFSSSNLGKTPLADPK  | S | 447  |
| 2113 | LOC Os04g51120.1 | ETAAKDPFDFSSSNLGKTPLADPKA  | S | 448  |
| 2114 | LOC Os04g51120.1 | SSTGITYKSSSASFSGSNYSSGERYG | S | 178  |
| 2117 | LOC Os04g51370.1 | HWLAAGLSPQVGSVNRSLPPNNPYP  | S | 512  |
| 2118 | LOC Os04g51700.1 | LDADYISKMEEDSSDRDQGAHTAP   | S | 960  |
| 2119 | LOC Os04g51700.1 | QHAKIDDVEPEESDHGETGLDDQIP  | S | 879  |
| 2120 | LOC Os04g51700.1 | RGKQHAKIDYQGSESDPGETGQDD   | S | 933  |
| 2124 | LOC Os04g51710.1 | GPLNSSGAQRKVSGPLDSAASKKTR  | S | 177  |
| 2125 | LOC Os04g51710.1 | QRKVSGPLDSAASKKTRATSFSHNQ  | S | 185  |
| 2127 | LOC Os04g51710.1 | GPLNKHGEPVKRSSGPQSGGVTPMA  | S | 128  |
| 2130 | LOC Os04g51710.1 | KMFELHAVKSRKSGPLSNAPSRNAS  | S | 62   |
| 2132 | LOC Os04g52050.1 | IDRIINSICPSSSPRHMTPEKVSNE  | S | 522  |
| 2133 | LOC Os04g52050.1 | PDIDRIINSICPSSSPRHMTPEKVS  | S | 520  |
| 2134 | LOC Os04g52050.1 | DIDRIINSICPSSSPRHMTPEKVSN  | S | 521  |
| 2138 | LOC Os04g52120.1 | LIPNQVHSEKRMSSFRLKLPTPELE  | S | 223  |
| 2139 | LOC Os04g52120.1 | IPNQVHSEKRMSSFRLKLPTPELER  | S | 224  |
| 2141 | LOC Os04g52180.1 | NNKSKSFLKPIGSISKKKVQLHLKI  | S | 91   |
| 2145 | LOC Os04g52540.1 | AARSSGTVERIASTEVVVRVQPPAPP | S | 169  |
| 2147 | LOC Os04g52570.1 | PKLTPGSTPKFLSGPTSPTKSLSEV  | S | 201  |
| 2150 | LOC Os04g52920.1 | WASKEELELVSASPSIADLERMKKE  | S | 403  |
| 2157 | LOC Os04g52960.1 | GRDNSSFKKPAQSSGNTIFIKGFDT  | S | 546  |
| 2160 | LOC Os04g52960.1 | KKSAVEVAPTSVSVSEKSGKKGKR   | S | 18   |
| 2163 | LOC Os04g53540.1 | SDPLGGDEFESKSGSENVGVSVD    | S | 84   |

|      |                  |                           |   |      |
|------|------------------|---------------------------|---|------|
| 2165 | LOC Os04g53670.1 | NTFSPRKLSRQNSFGSIGTPRTPNL | S | 1127 |
| 2169 | LOC Os04g54340.1 | RSVTAQSNLNSFSDDDETREMLLGA | S | 539  |
| 2170 | LOC Os04g54440.1 | MAPKKRKADPAESPVASSEAGAGTN | S | 13   |
| 2174 | LOC Os04g54940.1 | KSLQANRLSSANSADGGPCVGKVVN | S | 166  |
| 2175 | LOC Os04g55040.1 | AKESMGAMRASSFSLAEAKYVAGD  | S | 67   |
| 2176 | LOC Os04g55220.1 | KEETPNPFRQQFSMTSLERTMTSME | S | 406  |
| 2182 | LOC Os04g56140.1 | AEPEIHMESDINSASELRTKDTGPH | S | 464  |
| 2183 | LOC Os04g56140.1 | ESRRSRLGSSGSSPDASKVRQYGST | S | 334  |
| 2186 | LOC Os04g56160.1 | PSSALLGQNKDASLEALPVDELIEK | S | 545  |
| 2190 | LOC Os04g56440.1 | SLLDAIARLDDASDSESEDMAVGAQ | S | 373  |
| 2193 | LOC Os04g56530.1 | HVSGQLDYVRHLSGLERHESILPLL | S | 916  |
| 2194 | LOC Os04g56530.1 | SVTQNGSTPRRRSGQLDPPMLEISK | S | 790  |
| 2196 | LOC Os04g56530.1 | SLLEKEPPSRHVSGQLDYVRHLSGL | S | 906  |
| 2199 | LOC Os04g56630.1 | SSADHSDGTGLSSPKGALLGLASYD | S | 585  |
| 2200 | LOC Os04g56630.1 | PKGALLGLASYDSDDDEDEGNEDK  | S | 598  |
| 2201 | LOC Os04g56640.1 | LEDQGVRLYPKSPDIDFKKELRTL  | S | 66   |
| 2202 | LOC Os04g56720.1 | SNKRKTKDVSESEDDDEEDDSDD   | S | 467  |
| 2205 | LOC Os04g56740.1 | ACAGGSDPSAGSDGDADDHVDENK  | S | 25   |
| 2206 | LOC Os04g56740.1 | LKFEELTSNLTVSRNSLDGANKPK  | S | 565  |
| 2207 | LOC Os04g56740.1 | ELTSNLTVSRNSLDGANKPKVHTP  | S | 569  |
| 2208 | LOC Os04g56740.1 | GGKFQDSLICSSSEKLLNNGFALKL | S | 338  |
| 2209 | LOC Os04g56740.1 | RAKASASVSPKLSPDVQDNNPRKRH | S | 836  |
| 2210 | LOC Os04g56740.1 | QFTESARAKASASVSPKLSPDVQDN | S | 830  |
| 2212 | LOC Os04g56740.1 | FAAAQLKFEELTSNLTVSRNSLDG  | S | 560  |
| 2213 | LOC Os04g56740.1 | KDNSVLHSEVNTSGGAIEPEKEVQT | S | 669  |
| 2217 | LOC Os04g57300.1 | LLLTRNSINRSCSTPCLCPVSKDFE | S | 102  |
| 2218 | LOC Os04g57300.1 | SGSNGSVHALNRSADQLPSSVYFV  | S | 547  |
| 2219 | LOC Os04g57600.1 | RRRRINESSLAISPERNGEQRRRDE | S | 410  |
| 2222 | LOC Os04g57600.1 | EAGQHEEQTRRSSELALGSRNADG  | S | 508  |
| 2223 | LOC Os04g57600.1 | SRLQGRIKLPGRSPDRVDTRSEKER | S | 460  |
| 2228 | LOC Os04g58140.1 | AIDTLPPPSRDVSKPLRLPICDVFS | S | 480  |
| 2229 | LOC Os04g58280.1 | QKQVAHAPAELNSPRSSAAKPKNPD | S | 18   |
| 2231 | LOC Os04g58620.1 | DLAVEGIEQLESSREMSDDESTDKL | S | 387  |
| 2237 | LOC Os04g59330.1 | AKTDSEVTSLAPSSPPRSPTSRGGR | S | 15   |
| 2238 | LOC Os04g59330.1 | KTDSEVTSLAPSSPPRSPTSRGGRP | S | 16   |
| 2240 | LOC Os04g59400.1 | PSQSDEEPLHRQSQFSDAEEGMEGP | S | 185  |
| 2241 | LOC Os04g59400.1 | SDEEPLHRQSQFSDAEEGMEGPISP | S | 188  |
| 2245 | LOC Os04g59460.1 | SKKKSLSFSSFSKRTQPSHLFSGN  | S | 1268 |
| 2248 | LOC Os04g59570.1 | VAARPLRSRRALSVFTCAAPPRQRP | S | 25   |
| 2251 | LOC Os05g01060.1 | PQQAYSHVQSPMSSPVRARRDWDLL | S | 388  |
| 2252 | LOC Os05g01060.1 | QQAYSHVQSPMSSPVRARRDWDLLG | S | 389  |
| 2254 | LOC Os05g01350.1 | RPLPPLPRVGPPSGEFASRSSASDP | S | 326  |
| 2261 | LOC Os05g01990.1 | SSAHGKNHTSLLSDDEEEILEKHN  | S | 267  |

|      |                  |                            |   |     |
|------|------------------|----------------------------|---|-----|
| 2262 | LOC Os05g02240.1 | RRRLHHRKLHGPSAPSSPSAAATAG  | S | 453 |
| 2266 | LOC Os05g02400.1 | SSACPNKVAAVNSDMEKSYGGSSTI  | S | 491 |
| 2269 | LOC Os05g02500.1 | ERRGGFSSLKLPSFQKDLVLP RPVP | S | 596 |
| 2272 | LOC Os05g03060.1 | AAEASRLDPAGDSPEMRRVVD PDGA | S | 51  |
| 2273 | LOC Os05g03060.1 | SHTSESFSTRSSSLSPSLRNSNDHA  | S | 428 |
| 2274 | LOC Os05g03060.1 | TSESFSTRSSSLSPSLRNSNDHAPT  | S | 430 |
| 2275 | LOC Os05g03060.1 | ESFSTRSSSLSPSLRNSNDHAPTRA  | S | 432 |
| 2277 | LOC Os05g03120.1 | LKKAHNKDDVDGSGSPDHGEAVEK   | S | 301 |
| 2279 | LOC Os05g03120.1 | AGITPTRTTTPERSPKVTERRSRSP  | S | 50  |
| 2280 | LOC Os05g03120.1 | ASSPFSDEPEEESPKRRNSGVLRRM  | S | 582 |
| 2281 | LOC Os05g03120.1 | EYTNMIGGKLASSPFSDEPEEESP   | S | 571 |
| 2283 | LOC Os05g03120.1 | SMIGGKLASSPFSDEPEEESPKRRN  | S | 575 |
| 2290 | LOC Os05g03440.1 | KDAAAAAEIAAPSPRKSQKASAAAE  | S | 268 |
| 2291 | LOC Os05g03630.1 | RLAMKHHPDKNRSPHADDSL FKQVS | S | 38  |
| 2293 | LOC Os05g03630.1 | RAPGAGFPFGGSPRAGETSATKAP   | S | 132 |
| 2296 | LOC Os05g03760.1 | RLLLKSPAVSPSSSPKKSASPPSP   | S | 173 |
| 2298 | LOC Os05g03760.1 | KAIRLLLKSPAVSPSSSPKKSASPP  | S | 170 |
| 2299 | LOC Os05g03760.1 | QGDELHKLKRSASFARQQSAMPVA   | S | 551 |
| 2301 | LOC Os05g03780.1 | PPQIAEVRMDISSSTSVAAGNKVCR  | S | 20  |
| 2303 | LOC Os05g03820.1 | KEGKPNGYLSLRSHIWTDTDNNSRG  | S | 271 |
| 2304 | LOC Os05g05220.1 | SRRGKKAWRANISTDDIEDFFEKQT  | S | 20  |
| 2305 | LOC Os05g05230.1 | RPDGSELPGKSESDDCSQISGLKVE  | S | 377 |
| 2309 | LOC Os05g05300.1 | GTTEIKEPHDQQSESDSQEELDRFI  | S | 331 |
| 2312 | LOC Os05g05300.1 | EKPRNSATASGRSVFRESEDDDELDT | S | 488 |
| 2315 | LOC Os05g05590.1 | FGGRGFVPFVPGSPVERSIHGSQLG  | S | 524 |
| 2317 | LOC Os05g05720.1 | SNTRSSVTATGRSPSPNSSSLAPLN  | S | 94  |
| 2319 | LOC Os05g05950.1 | GIRHGRQTNRAFSLDNARKKAMLL   | S | 646 |
| 2321 | LOC Os05g05950.1 | AAKQIMKELGEGSASVSPVSGLSSS  | S | 467 |
| 2325 | LOC Os05g06630.1 | SKPDS DIAEHDDSPKSSSGRLTRSR | S | 39  |
| 2327 | LOC Os05g06980.1 | SRAQITEDQDKSSGNISVENIEGLK  | S | 247 |
| 2330 | LOC Os05g07000.1 | RSHNLTS DGMNPSPRERDDQNGSHR | S | 269 |
| 2331 | LOC Os05g07000.1 | ALPANGRSHNLTS DGMNPSPRERDD | S | 263 |
| 2334 | LOC Os05g07130.1 | RGVGSTKFGKSSSACSLASGLNFGT  | S | 330 |
| 2335 | LOC Os05g07220.1 | KDNWADSDVENGSISRSSDEKESRE  | S | 235 |
| 2337 | LOC Os05g07680.1 | RCHCNFGANSELSEHEEKQQVSDVE  | S | 217 |
| 2339 | LOC Os05g07680.1 | SELSEHEEKQQVSDVETSSLQKDLD  | S | 226 |
| 2340 | LOC Os05g07980.1 | PAQDRWRRKRKVSFPPRHALSPP IF | S | 586 |
| 2341 | LOC Os05g08370.1 | IQRQGEDVDLSSSSRHEQHRI PRLT | S | 141 |
| 2343 | LOC Os05g08600.1 | RRPPSVKASLSVSFGQGRAPHRASTR | S | 207 |
| 2345 | LOC Os05g08840.1 | KMDTDDALGDPASGTDENMQESKCS  | S | 526 |
| 2347 | LOC Os05g09540.1 | PAASVPWRWLAFSLCRFLDL PADGS | S | 86  |
| 2351 | LOC Os05g10770.1 | RPPIDYSRFEHISDESDVEIVEKD   | S | 98  |
| 2354 | LOC Os05g11370.1 | PQGEDFDKLESDSDCKEVAALSAA   | S | 199 |

|      |                  |                            |   |      |
|------|------------------|----------------------------|---|------|
| 2355 | LOC Os05g11770.1 | IEPSLFFPKQYFSDTEEFEDVIYPK  | S | 280  |
| 2356 | LOC Os05g11770.1 | EDIVESVMMLGGSKSDTELDAEPER  | S | 757  |
| 2357 | LOC Os05g11770.1 | IVESVMMLGGSKSDTELDAEPERTA  | S | 759  |
| 2358 | LOC Os05g11770.1 | VSSANKDAIVCLSNHDEKNESPPAD  | S | 640  |
| 2359 | LOC Os05g11770.1 | IVCLSNHDEKNESPPADSYNHLDLR  | S | 648  |
| 2361 | LOC Os05g11980.1 | ISQKQEALQDTYSGDEIIDSMSHRSG | S | 1085 |
| 2362 | LOC Os05g12100.1 | SVQHCRHAQHTTSTPRRPACPEGDE  | S | 133  |
| 2364 | LOC Os05g13520.1 | ADFDDVAAAMKGSMLRAEADFPL    | S | 309  |
| 2366 | LOC Os05g18770.1 | SSVDKITDKKDLSTIRGESVLGKS   | S | 67   |
| 2372 | LOC Os05g22940.1 | TKLSELRARIARSLSELEMFTEESK  | S | 1200 |
| 2374 | LOC Os05g22990.1 | KVSEPTGSPAKDSPVGKEKAIEKSQ  | S | 722  |
| 2376 | LOC Os05g23320.1 | IEAVHLDKNGQASPDTSVVIRRTPK  | S | 614  |
| 2377 | LOC Os05g23320.1 | PTPLRQKYSRMSSLFNNKRTMAARI  | S | 550  |
| 2378 | LOC Os05g23610.1 | QDDDPEAEKSRLSFKEHRAHYDEF   | S | 106  |
| 2381 | LOC Os05g23610.1 | SKTDPKDDGWASSDDADAMEQDDD   | S | 85   |
| 2388 | LOC Os05g27820.1 | SSLMEATALLRSSSFKEDSYVASAL  | S | 45   |
| 2400 | LOC Os05g28190.1 | DALPVTDKSAGSSEVAETEKDGSDL  | S | 128  |
| 2406 | LOC Os05g30340.1 | LRVSVKRESGAHSEDESVAPTVSVK  | S | 392  |
| 2407 | LOC Os05g30340.1 | PCKRLRVSVKRESGAHSEDESVAPT  | S | 388  |
| 2408 | LOC Os05g30420.1 | ARAPVDEFEPVDSGSDLESDDLKSA  | S | 110  |
| 2411 | LOC Os05g30510.1 | GGEQQSSAAAASSGDGVAAAANVDR  | S | 48   |
| 2413 | LOC Os05g31920.1 | ETKSNAQLSRLSSLESFKHMSRTS   | S | 763  |
| 2415 | LOC Os05g32070.1 | QQLAGAASSPPTSSAFPAATTASAK  | S | 166  |
| 2416 | LOC Os05g32070.1 | RRRERQQLAGAASSPPTSSAFPAAT  | S | 161  |
| 2420 | LOC Os05g32600.1 | KLADFGRLARIFGSPERNFTHQVFAR | S | 168  |
| 2422 | LOC Os05g32760.1 | IQEPEDEKYVPASPPRPPLSPPTPV  | S | 269  |
| 2426 | LOC Os05g33100.1 | VVKQFEQVLSSKSGIGHFVKIFPGV  | S | 193  |
| 2427 | LOC Os05g33310.1 | FVRVRPSTPVDLSPLSPPTKAMTLW  | S | 243  |
| 2428 | LOC Os05g33310.1 | RPSTPVDLSPLSPPTKAMTLWQAPP  | S | 247  |
| 2431 | LOC Os05g34500.1 | HQQQQQPHRRNLSLEELAGEVGLSP  | S | 71   |
| 2435 | LOC Os05g34780.1 | ENITPEDESLDSSDNTDSIMERKS   | S | 340  |
| 2436 | LOC Os05g34780.1 | MAIMIEKNVDVSDGERVDFSDRET   | S | 143  |
| 2437 | LOC Os05g34790.1 | HGKSGDMTVDLSDGSEDHGTRQHE   | S | 156  |
| 2440 | LOC Os05g36090.1 | GRSASDVIRRSASGHEAAPPFQTET  | S | 416  |
| 2444 | LOC Os05g37434.1 | LDPQVGSPQNKTSPTKHSLAEPMMN  | S | 131  |
| 2447 | LOC Os05g37720.1 | GREEDELGAFLSGMRLRLRYLYYRT  | S | 141  |
| 2452 | LOC Os05g38710.1 | DVSNEDETELEIASPSFGKYDTFKSC | S | 509  |
| 2455 | LOC Os05g38810.1 | IRRAASQLTGSSSIVKSQNEQVPHK  | S | 563  |
| 2458 | LOC Os05g38810.1 | NIAETENGDFDVSSDDAINELSVEK  | S | 588  |
| 2460 | LOC Os05g38810.1 | DEFDGLQSKKKRSLDSFEDPETKAA  | S | 525  |
| 2461 | LOC Os05g38810.1 | DGLQSKKKRSLDSFEDPETKAAAPS  | S | 528  |
| 2462 | LOC Os05g38810.1 | KPQDGLLELTEKKSTSNLSTDNAYDH | S | 490  |
| 2467 | LOC Os05g38810.1 | PETKAAAPSFSGSSFKIGECIRRAAS | S | 544  |

|      |                  |                             |   |     |
|------|------------------|-----------------------------|---|-----|
| 2468 | LOC Os05g38830.1 | TSGSGVMTERVPSFSRKKFKVDRDN   | S | 125 |
| 2469 | LOC Os05g38950.1 | LQYQTSQQKALLSPLSPRTSMIDA    | S | 699 |
| 2470 | LOC Os05g38950.1 | TSQQKALLSPLSPRTSMIDASPGR    | S | 703 |
| 2471 | LOC Os05g38950.1 | PLSPRTSMIDASPGRANHDSQEF     | S | 712 |
| 2473 | LOC Os05g38950.1 | QVETPKLDVLEESMGSPKEDNKS RV  | S | 786 |
| 2474 | LOC Os05g38950.1 | VIHPVKVQEGKLS ESDSDEFYDV DK | S | 143 |
| 2476 | LOC Os05g39390.1 | EREKVQAVFKRLSSDPVGIRVHDVI   | S | 61  |
| 2482 | LOC Os05g39730.1 | PRRSPGPSPLGGSPTMGDRMTKAPT   | S | 530 |
| 2483 | LOC Os05g39840.1 | LGQILSQKYDAL SPLRIDHGGASRR  | S | 503 |
| 2485 | LOC Os05g40420.1 | AVGLPSDDDMGNSEVGHNALGAGRI   | S | 81  |
| 2486 | LOC Os05g41100.1 | KKKDILAGSDNESDGGGGEEDLSKI   | S | 22  |
| 2487 | LOC Os05g41100.1 | EEEEKKKDILAGSDNESDGGGGEED   | S | 18  |
| 2489 | LOC Os05g41100.1 | RPYLETGSEKKYSPDDIQEVSDEEE   | S | 277 |
| 2492 | LOC Os05g41480.1 | QALKAKEAQKKISQADEEAGSLLQE   | S | 329 |
| 2495 | LOC Os05g41670.1 | NDDEDEEHPMGSSSHGGDRIKNRSL   | S | 222 |
| 2496 | LOC Os05g41790.1 | SQHVD TNVIRGGSLEKPLTFADKLA  | S | 508 |
| 2498 | LOC Os05g41790.1 | SNALSSQRFGSSSPGGDMKNKTRKR   | S | 111 |
| 2500 | LOC Os05g42220.1 | TENESGKIKKSQSLGDMLEMEKLYD   | S | 80  |
| 2501 | LOC Os05g42230.1 | LAGGAAAAIQPNSPRFFFSSLAAS    | S | 38  |
| 2502 | LOC Os05g42300.1 | DSLFEEGELMLASDDDDDEEAPKGPI  | S | 230 |
| 2503 | LOC Os05g42300.1 | GENDEDQTDPEFS DDEKEAEYKRSL  | S | 379 |
| 2504 | LOC Os05g42300.1 | NMKELYAKGYD GSGENDEDQTDPEF  | S | 366 |
| 2505 | LOC Os05g43060.1 | WGEACKETEKTGSDTDPWGSKVKEI   | S | 795 |
| 2506 | LOC Os05g43280.1 | RDEDRSLSGESLSEWRSCEQVESES   | S | 30  |
| 2510 | LOC Os05g43380.1 | HSEDEQDFIVERSPRLQSPI SKESS  | S | 242 |
| 2511 | LOC Os05g43520.1 | RTSLGQEEDVSFS DLEDDDDGNGK   | S | 414 |
| 2516 | LOC Os05g43670.1 | EEEEDDDEDAPASLPPPPRRARAPP   | S | 188 |
| 2518 | LOC Os05g43860.1 | SRDMVPPLPPLPSMKSPSES WLSRA  | S | 510 |
| 2519 | LOC Os05g43950.1 | VPSPASSLQNSQS QGNREASDPPS   | S | 93  |
| 2520 | LOC Os05g43970.1 | QESDEEYDRSQESDEEESDNFQKNK   | S | 60  |
| 2522 | LOC Os05g44320.1 | DAGALDLIDDEDSDVEEGIDQQTRG   | S | 681 |
| 2525 | LOC Os05g44380.1 | ASELLLPVASSPS PRSAAAAASRSP  | S | 89  |
| 2527 | LOC Os05g44922.1 | DSYPNLRALRNASSVSLADAA YVKI  | S | 71  |
| 2528 | LOC Os05g44922.1 | PNLRALRNASSVSLADAA YVKISEG  | S | 74  |
| 2529 | LOC Os05g45060.1 | ITVPRVIFVADDS DSPGSSSRGGAG  | S | 84  |
| 2530 | LOC Os05g45060.1 | VPRVIFVADDS DSPGSSSRGGAGGG  | S | 86  |
| 2531 | LOC Os05g45280.1 | MGDEKSPLSQMGSRDRDRELLIPVS   | S | 13  |
| 2544 | LOC Os05g46500.1 | LQRSSETFRRSGSSGLVWDDRHL SG  | S | 16  |
| 2546 | LOC Os05g46620.1 | FQGAKS LYHRENSLQVETSPRQGAA  | S | 323 |
| 2548 | LOC Os05g47470.1 | EDEDEAAAPATPSKEAEVGYHGLMA   | S | 178 |
| 2549 | LOC Os05g48020.1 | IGEGLETLKNMASDMNEELDRQVPL   | S | 198 |
| 2551 | LOC Os05g48260.1 | ERDVEAAVPVPMSPAGRLFRET NFN  | S | 93  |
| 2552 | LOC Os05g48260.1 | TPSPSSLRKRVL SIDTSSRDSRGSP  | S | 39  |

|      |                  |                            |   |      |
|------|------------------|----------------------------|---|------|
| 2553 | LOC Os05g48290.1 | QVGDMEKLGISESFKAKQAVLMSAT  | S | 501  |
| 2554 | LOC Os05g48820.1 | EKDVDDAERDEDESECDDADDDPDGD | S | 910  |
| 2555 | LOC Os05g49050.1 | DGLAPHSHEPIYSPGDFSKRAPPLI  | S | 62   |
| 2559 | LOC Os05g49180.1 | GAFSGLLPVPSRSADDNNVELPVIE  | S | 427  |
| 2560 | LOC Os05g49230.1 | DSENEDIQTREYSDEEMDSDEEQQR  | S | 441  |
| 2565 | LOC Os05g50480.1 | KTANGDEEVAAVSDNHSIDQSDVRI  | S | 453  |
| 2566 | LOC Os05g50480.1 | GDEEVAAVSDNHSIDQSDVRIHEYE  | S | 457  |
| 2567 | LOC Os05g50480.1 | VAAVSDNHSIDQSDVRIHEYENKDT  | S | 461  |
| 2570 | LOC Os05g50480.1 | TQPGLGHEHRNPSDGNLSSAAAAAQ  | S | 841  |
| 2571 | LOC Os05g50530.1 | LPKDIPLPTESVSRGKRRRAVSAIES | S | 181  |
| 2572 | LOC Os05g50530.1 | RNLPKDIPLPTESVSRGKRRRAVSAI | S | 179  |
| 2573 | LOC Os05g50530.1 | TESVSRGKRRRAVSAIESSFNLDARA | S | 189  |
| 2579 | LOC Os05g51630.1 | RRNTPAQSKYEGSDTLSPETVHER   | S | 754  |
| 2585 | LOC Os05g51850.1 | AVQNGGEVRCLLSDGASSMGNRGPG  | S | 376  |
| 2586 | LOC Os05g51850.1 | GGEVRCLLSDGASSMGNRGPGSPRK  | S | 380  |
| 2590 | LOC Os06g01400.1 | KFFYKMDTQKKLSEFRDQLSSILFH  | S | 721  |
| 2591 | LOC Os06g01650.1 | PSSTIALRESSASPPPSVQSIPVQS  | S | 1070 |
| 2596 | LOC Os06g01680.1 | NAFVEKKLQPQSSNISLEPKVIDAT  | S | 305  |
| 2597 | LOC Os06g01700.1 | DDSDVEPRSDDESDEDDDDDDTEA   | S | 123  |
| 2599 | LOC Os06g01700.1 | DKIVPREIDADDSVPRSDDESDE    | S | 113  |
| 2600 | LOC Os06g02028.1 | LTTYDFEADCFSSPYDDLNRKRLAY  | S | 110  |
| 2601 | LOC Os06g02130.1 | DSRYESKEFDDVSEQYVAVTKKEKR  | S | 183  |
| 2602 | LOC Os06g02160.1 | KAYGISRMNLVPSLMEIILPSLEKN  | S | 299  |
| 2607 | LOC Os06g02180.1 | GGLPASRMERRLSIMRSQKAMTRSQ  | S | 229  |
| 2609 | LOC Os06g02370.1 | EKRLGMEKGEGMSAVADSGEGRGRV  | S | 573  |
| 2611 | LOC Os06g02380.1 | QKVGAEIVRRALSYPLKLIKNAGV   | S | 505  |
| 2612 | LOC Os06g03676.1 | ASDSQLLEKFDLSDSEDATSDSNE   | S | 504  |
| 2614 | LOC Os06g03910.1 | LYEMAKREGLLPSSPTTSRRRGSSS  | S | 309  |
| 2616 | LOC Os06g04330.1 | SRIRRMIEGLDDSDPEDIFDPVFK   | S | 403  |
| 2624 | LOC Os06g05190.1 | QSKPRSDDAQYSDDTIEMTEEEID   | S | 322  |
| 2626 | LOC Os06g05310.1 | RFVTPLPMGVDMSQQRRRTFLLNAG  | S | 229  |
| 2631 | LOC Os06g06014.1 | EDVETGKNDSGLSDVDAMKENSNG   | S | 292  |
| 2632 | LOC Os06g06014.1 | QENNVADEKTISSDQVAEKEDVE    | S | 271  |
| 2636 | LOC Os06g06830.1 | DRSAPHATEGASSSRVSPQHGRGNQ  | S | 124  |
| 2638 | LOC Os06g07350.1 | PAPPGAERTLYPSMDPQRMGALVKS  | S | 370  |
| 2639 | LOC Os06g07820.1 | QSPDDRVLIKTRSNQSIDQWVFAKS  | S | 268  |
| 2640 | LOC Os06g07820.1 | DDRVLIKTRSNQSIDQWVFAKSKSE  | S | 271  |
| 2642 | LOC Os06g08023.1 | DEFLIKCDGVKNSLLPSMAKLLKLN  | S | 176  |
| 2643 | LOC Os06g08140.1 | RVSRPGRVARISAEGLNSLRTLRL   | S | 346  |
| 2650 | LOC Os06g08480.1 | ETKPDASEETSSSESGSKKKPVKRY  | S | 21   |
| 2651 | LOC Os06g08480.1 | KPDASEETSSSESGSKKKPVKRYLI  | S | 23   |
| 2656 | LOC Os06g08740.1 | PSPLGLRLRKSPSLDLIQMRLSQA   | S | 89   |
| 2657 | LOC Os06g08740.1 | TSDESLMARVDSLCLLIQKDTTPPV  | S | 453  |

|      |                  |                           |   |      |
|------|------------------|---------------------------|---|------|
| 2658 | LOC Os06g08740.1 | GPAQPPAMSRKDSFGDLLMNLPRIA | S | 513  |
| 2662 | LOC Os06g08840.1 | PRRRSVSPARARSYSRSPQYNRGRD | S | 159  |
| 2663 | LOC Os06g08840.1 | RRSVSPARARSYSRSPQYNRGRDES | S | 161  |
| 2665 | LOC Os06g08840.1 | PRYRRSPSYGRRSYSPAGRSPRRRS | S | 139  |
| 2666 | LOC Os06g08840.1 | SYGRRSYSPAGRSPRRRSVSPARAR | S | 146  |
| 2667 | LOC Os06g08850.1 | DLSTRESFFSRRSFEDDGSPEHSLV | S | 642  |
| 2668 | LOC Os06g08850.1 | SFFSRRSFEDDGSPEHSLVLNAVRK | S | 648  |
| 2669 | LOC Os06g09570.1 | RTFTTNRMGRQLSSMGFDPRALDR  | S | 551  |
| 2671 | LOC Os06g09570.1 | GRKRERSLSRAASDGDMDIDGQQS  | S | 582  |
| 2672 | LOC Os06g09930.1 | FKRSLPTLTRFKSQQENELTSLIVD | S | 305  |
| 2673 | LOC Os06g10710.1 | GDRRPAARAPNPSLSPRGGGGAPSR | S | 56   |
| 2674 | LOC Os06g10710.1 | RRPAARAPNPSLSPRGGGGAPSRKS | S | 58   |
| 2678 | LOC Os06g11970.1 | LMFSPSGRLSHFSGRRRIEDVLTRY | S | 58   |
| 2679 | LOC Os06g12030.1 | FSVEDEKNEGSESISSGNIGSDAEP | S | 180  |
| 2680 | LOC Os06g12030.1 | VEDEKNEGSESISSGNIGSDAEPKS | S | 182  |
| 2681 | LOC Os06g12030.1 | EKNVAVTEGSTNSEEKDQDEDLLRR | S | 20   |
| 2682 | LOC Os06g12080.1 | AVAFLSGLGLSRSGIAAAVAADPRL | S | 92   |
| 2683 | LOC Os06g12160.1 | VFHNLARLSPLTSSLKRLVGGLKAR | S | 512  |
| 2684 | LOC Os06g12260.1 | ASLGDAGGNADASPAAPALRPAAVA | S | 78   |
| 2685 | LOC Os06g12400.1 | NGSKQIDASDLPSSDSADNDYDPTL | S | 346  |
| 2687 | LOC Os06g12400.1 | KSAEKLIPGLENSDEARRKAVQREL | S | 773  |
| 2689 | LOC Os06g12580.1 | PQQEESYGSEYGSYGGRKPAESYG  | S | 225  |
| 2690 | LOC Os06g12610.1 | PRKADGVERDDFSFGNRGVAERDAE | S | 386  |
| 2691 | LOC Os06g12780.1 | PSDAGAAPHAPPSPRRGAKKGAAA  | S | 126  |
| 2692 | LOC Os06g13810.1 | QASNAPAPTRLASVYSEVQTSRLKH | S | 28   |
| 2694 | LOC Os06g13820.1 | PNTDGGSMRQNSNDGALDTMARRPA | S | 722  |
| 2695 | LOC Os06g13820.1 | NKIRAVIQSKGGSFKGPNTDGGSMR | S | 706  |
| 2696 | LOC Os06g13820.1 | QSSLLSKLTRQLSVHDNRAASYAND | S | 826  |
| 2698 | LOC Os06g14080.1 | RGPARRRGTVRASLDADEFIALMHG | S | 26   |
| 2699 | LOC Os06g14406.1 | MSQKSGRSSGMESPASLQIEDTRSM | S | 171  |
| 2701 | LOC Os06g14412.1 | EVEEKLIDDISGSPSSHLPVALKST | S | 1987 |
| 2706 | LOC Os06g14412.1 | EVDKEIVHCTISSPIGDQENLQGNL | S | 2427 |
| 2707 | LOC Os06g14412.1 | TRSDIETPAMDASESKSPESDVHEL | S | 1366 |
| 2709 | LOC Os06g14412.1 | PAMDASESKSPESDVHELSEFEFM  | S | 1373 |
| 2710 | LOC Os06g14412.1 | RRGRPRRSDASLSPVTAPPNTGKQE | S | 158  |
| 2712 | LOC Os06g14412.1 | KNDDSPIERSSPSADKIAQVAYGGE | S | 935  |
| 2714 | LOC Os06g14412.1 | TIEKNDDSPIERSSPSADKIAQVAY | S | 932  |
| 2718 | LOC Os06g16160.1 | AFRSALRAAATGSHRHATRRTVIVR | S | 690  |
| 2720 | LOC Os06g16390.1 | YYDTNCGEALICDSEDEAVEDEEE  | S | 178  |
| 2723 | LOC Os06g16980.1 | RHPKCKYIARTLSDDDDETEASDET | S | 1008 |
| 2724 | LOC Os06g17290.1 | TQMAVSALNRALSSEYPSKSRSEGR | S | 73   |
| 2725 | LOC Os06g17290.1 | SNHSGSQVGNWRSANEQLPTSASFV | S | 641  |
| 2726 | LOC Os06g17840.1 | EINLDNQENLGESEKSKPKKKRMDA | S | 1197 |

|      |                  |                            |   |      |
|------|------------------|----------------------------|---|------|
| 2730 | LOC Os06g17840.1 | KKGAKKPHAEILSSSPKKSDEAGSS  | S | 1304 |
| 2735 | LOC Os06g17840.1 | ENKVEGAKKRDDSVDELVTSPASV   | S | 1272 |
| 2737 | LOC Os06g18130.1 | IQNKDARSKEASSSGGDDCTGVNF   | S | 74   |
| 2738 | LOC Os06g19390.1 | MDLPWSEMFRSASLRLPKQEEPTTT  | S | 32   |
| 2739 | LOC Os06g19650.1 | VGPAVAPEASVDSQHIEDAATEDG   | S | 49   |
| 2740 | LOC Os06g19660.1 | ADGSVSTLLKHPSGAGDENTVSEAP  | S | 838  |
| 2742 | LOC Os06g19660.1 | TDKYSVEDSQSRADGSVSTLLKHP   | S | 825  |
| 2743 | LOC Os06g19660.1 | GASGQGSFGRKDSFGKEEPRGSQGD  | S | 704  |
| 2747 | LOC Os06g20370.1 | QKLQLIWDEVGESDEDKVLQYQLD   | S | 24   |
| 2750 | LOC Os06g20390.1 | TNSHLTDMGRSQSFGSGQHNEASS   | S | 182  |
| 2758 | LOC Os06g22700.1 | GWGSDPKGYPARSPPDHAGRYADPV  | S | 171  |
| 2759 | LOC Os06g22700.1 | GGGRGVARFRDGSPPYGRGGRSYGR  | S | 44   |
| 2760 | LOC Os06g22820.1 | LQVPESKDEDDDDSTEewanFRGGDS | S | 443  |
| 2763 | LOC Os06g23460.1 | RSSKRGYHYDQDSPPRSKPRFDRR   | S | 17   |
| 2764 | LOC Os06g23530.1 | FLRGQGRSTIDVSPVRISTNPDGSL  | S | 327  |
| 2771 | LOC Os06g29400.1 | KEEIANASADVPSDNVEELGLKYEK  | S | 837  |
| 2772 | LOC Os06g29400.1 | VQRPVDLYKAIFSDSDDDMAEPLA   | S | 730  |
| 2773 | LOC Os06g29400.1 | PVDLYKAIFSDSDDDMAEPLANQP   | S | 733  |
| 2775 | LOC Os06g29430.1 | SNSNRSVKKSSSSNSQNTegWISSQ  | S | 1125 |
| 2779 | LOC Os06g29430.1 | RCRDCHRRKDAESDYDEDEYSGRQ   | S | 243  |
| 2780 | LOC Os06g30020.1 | YSRYHSYDYGPAshGRSHPDrgw    | S | 477  |
| 2783 | LOC Os06g30750.1 | RSRGFRLLGEDTSVHKALGGGKTAD  | S | 70   |
| 2784 | LOC Os06g30750.1 | PADTAAASPEKVSSPPPEPAPAVRS  | S | 47   |
| 2789 | LOC Os06g33520.1 | DLKTDSFHLGLSSGDEGEASTRGA   | S | 89   |
| 2791 | LOC Os06g33520.1 | SDLKTDSFHLGLSSGDEGEASTRGP  | S | 88   |
| 2792 | LOC Os06g33520.1 | RGYDFDDEPGFQSPKQGRQGGRYS   | S | 238  |
| 2795 | LOC Os06g34420.1 | FSEPPKVNLDLESSASKHRKKRVN   | S | 484  |
| 2796 | LOC Os06g34440.1 | SRQKQEVKYNEsdGDDTDCHGNGD   | S | 367  |
| 2798 | LOC Os06g34440.1 | HGNGDDGFVSSPSLKRRLKGGLFHG  | S | 387  |
| 2802 | LOC Os06g34710.1 | EGERGGEVVLEVSDMDEEDGEDDTD  | S | 271  |
| 2808 | LOC Os06g36360.1 | YDSEPGRSVKRAISPSISPVHQKT   | S | 552  |
| 2812 | LOC Os06g36940.1 | EGQREDEDWIGESEDdKDSLSRGSS  | S | 270  |
| 2816 | LOC Os06g38960.1 | PCRPKPSLDVSKSVCGLDLSSVKDN  | S | 60   |
| 2818 | LOC Os06g39480.1 | DPQTLSPQDKFESKLQSPKKDAGSI  | S | 212  |
| 2819 | LOC Os06g39600.1 | LTTPrPRVQRSISAegLRELQSFld  | S | 351  |
| 2827 | LOC Os06g40650.1 | PPPMRNAYSrSTSFdQHSGVYSRSS  | S | 351  |
| 2833 | LOC Os06g40950.1 | DDAEKEEGFDMDSESEEDTKSKPES  | S | 63   |
| 2837 | LOC Os06g42200.1 | GRASGRDRGPGSSRPADAREKRKQ   | S | 342  |
| 2839 | LOC Os06g42490.1 | PFCGSPDINSRRSDSPDLEARRQPE  | S | 438  |
| 2840 | LOC Os06g42490.1 | CGSPDINSRRSDSPDLEARRQPEPP  | S | 440  |
| 2843 | LOC Os06g42790.1 | GLAKVDKDYAGFSPILIKSAFTDKK  | S | 332  |
| 2844 | LOC Os06g42810.1 | VRTLSDLGGGKDSAGSEdSEdDEYK  | S | 172  |
| 2847 | LOC Os06g43170.1 | DDDDGDLKKRSMsFIgrSTPQHHSK  | S | 494  |

|      |                  |                            |   |      |
|------|------------------|----------------------------|---|------|
| 2848 | LOC Os06g43560.1 | DHDSNPGHARKDSAESIGSDLSSLR  | S | 301  |
| 2852 | LOC Os06g43790.1 | CGAPEKSLDRNMSISASLVSDKRMM  | S | 1478 |
| 2853 | LOC Os06g43790.1 | EPRKTRKIVELSSFEKRDREDDNGF  | S | 1575 |
| 2854 | LOC Os06g43840.1 | KRINDRCFAGKPSEQDKMRNDFWNE  | S | 877  |
| 2856 | LOC Os06g43840.1 | QNSPNNQLTGEGLSGNARHREDGL   | S | 470  |
| 2857 | LOC Os06g43840.1 | SPNNQLTGEGLSGNARHREDGLTR   | S | 472  |
| 2862 | LOC Os06g44970.1 | GGGELEIEDGLKSPAAGLAAKFPVS  | S | 425  |
| 2863 | LOC Os06g44970.1 | DVGASIASFRVDSVVSLSNGREALQ  | S | 188  |
| 2864 | LOC Os06g44970.1 | SIASFRVDSVVSLSNGREALQADAE  | S | 192  |
| 2866 | LOC Os06g45560.1 | TKMSNIDVAIVGSLGGSYLRSYNYK  | S | 794  |
| 2869 | LOC Os06g45910.1 | DPPQLSELIPENSPVGKPKQDEIAEE | S | 180  |
| 2870 | LOC Os06g45990.1 | AVTLAAVVSKNASFREESNFLDDLK  | S | 46   |
| 2875 | LOC Os06g46890.1 | AAKEDPYNAYEMSPSDQRQNHETTR  | S | 268  |
| 2876 | LOC Os06g46890.1 | KEDPYNAYEMSPSDQRQNHETTRKR  | S | 270  |
| 2879 | LOC Os06g47320.1 | FLVNGVAFKKTFYSYAGFEQQPKKFL | S | 224  |
| 2880 | LOC Os06g47330.1 | KSSKKIPLNAVTSVIDGLKKLYIEK  | S | 158  |
| 2881 | LOC Os06g48350.1 | GSDEDHNSPTRSHDGDNVAADEDD   | S | 221  |
| 2882 | LOC Os06g48530.1 | GGPPQPAATRKRSRSPPPPPPPPSL  | S | 51   |
| 2883 | LOC Os06g48530.1 | PPQPAATRKRSRSPPPPPPPPSLPP  | S | 53   |
| 2884 | LOC Os06g48530.1 | DSDKRRKHGRGSSKETDPLSGAPVA  | S | 313  |
| 2886 | LOC Os06g48530.1 | DGSRYGRGDRSPSLDGADDQMFDAF  | S | 601  |
| 2887 | LOC Os06g48530.1 | PRARRPPPPPPDSPEGRSPPLPPPP  | S | 25   |
| 2889 | LOC Os06g48640.1 | TLARDIEVMEPKSPEDIYKVHLIDG  | S | 352  |
| 2892 | LOC Os06g49740.1 | GGDDDAEQEDAGSDDGYPMTEKQK   | S | 118  |
| 2893 | LOC Os06g49760.1 | AQELGGNMGRAGSPGFKWHLSNVQT  | S | 135  |
| 2894 | LOC Os06g49800.1 | QASDTEKIHGQASDTEISSELTAA   | S | 431  |
| 2895 | LOC Os06g49800.1 | LGVPSPSVSRGISFDENTLTDPVEL  | S | 238  |
| 2898 | LOC Os06g50840.1 | PYGARGTAPRSNSPLFDDYGRSIGS  | S | 145  |
| 2900 | LOC Os06g50890.1 | YGGGRARRERSRSLPYSPYRMPERG  | S | 249  |
| 2901 | LOC Os06g50890.1 | RARRERSRSLPYSPYRMPERGYGRQ  | S | 253  |
| 2903 | LOC Os06g50890.1 | MAETPERRRYSGSPSPYRCNPKSRS  | S | 13   |
| 2905 | LOC Os06g50890.1 | PDPRSQAARSRSREREPAVNHN     | S | 53   |
| 2906 | LOC Os06g50890.1 | RDYYDGRGGRGYSPHRSPPYGGGRA  | S | 230  |
| 2907 | LOC Os06g50890.1 | DGRGGRGYSPHRSPPYGGGRARRER  | S | 234  |
| 2913 | LOC Os06g51250.1 | RTDAFARFDSMKSTDYNSRGYSFDE  | S | 1148 |
| 2916 | LOC Os06g51250.1 | DQGSNDTFGRFDSFRSNADQGGGNS  | S | 1109 |
| 2917 | LOC Os06g51250.1 | SNDTFGRFDSFRSNADQGGGNSFTR  | S | 1112 |
| 2919 | LOC Os06g51250.1 | RSLFDSGPSRAESPTASSIYGKEQR  | S | 1021 |
| 2922 | LOC Os06g51270.1 | MDEQDQLGGLLDVHGGNRKHGMT    | S | 893  |
| 2923 | LOC Os06g51400.1 | LSDSDAYFPSIASDSESEGVRSKTP  | S | 132  |
| 2924 | LOC Os06g51400.1 | DSDAYFPSIASDSESEGVRSKTPMG  | S | 134  |
| 2925 | LOC Os06g51400.1 | DAYFPSIASDSESEGVRSKTPMGAN  | S | 136  |
| 2926 | LOC Os07g01110.1 | LGSGSTRILLIVSLLLCLRQQAVVD  | S | 17   |

|      |                  |                            |   |      |
|------|------------------|----------------------------|---|------|
| 2927 | LOC Os07g01320.1 | STSRDRDVDDADSDLEEEIQDVPRG  | S | 84   |
| 2928 | LOC Os07g01550.1 | GNMLHKDHDHHEFEAGAECDIIDCDH | S | 126  |
| 2933 | LOC Os07g01880.1 | GRRGVVASESEGESEDDYYAGRGHED | S | 177  |
| 2934 | LOC Os07g01880.1 | VASGRRGVVASESEGESEDDYYAGRG | S | 174  |
| 2935 | LOC Os07g01880.1 | KYTQPARQRRQLSPGFLEDALDEDE  | S | 496  |
| 2941 | LOC Os07g02230.1 | RILIENDDGSCGSETKNVVYHEILD  | S | 1399 |
| 2942 | LOC Os07g03070.1 | EAPRDEQRDPPPSPPNPSEEAGAGE  | S | 21   |
| 2946 | LOC Os07g03180.1 | RLTCPEKCFKSFSEFKDKHGGGGGGG | S | 109  |
| 2947 | LOC Os07g03230.1 | DADIEDPEKMVMSESEEEGDDDEEG  | S | 212  |
| 2950 | LOC Os07g04240.1 | DGKIYQRAFGGQSLDFGKGGQAYRC  | S | 161  |
| 2952 | LOC Os07g04530.1 | HANVPSWQASGSSPSKAVAPVQMSS  | S | 1504 |
| 2953 | LOC Os07g04530.1 | TTSDQQLMAVSKSVDGLESVGDSRN  | S | 1298 |
| 2955 | LOC Os07g04530.1 | ERRSAVAQQQPPSPTPAKVSINQRN  | S | 1479 |
| 2956 | LOC Os07g04530.1 | DLQDDAEELFWGSPIQVESSSKSAD  | S | 1185 |
| 2957 | LOC Os07g04530.1 | LGLESSLVLPAKSFSEYDTNKGW    | S | 1212 |
| 2958 | LOC Os07g04530.1 | EFPTLSSQTRSSSIKDQSPMNRQKS  | S | 1558 |
| 2959 | LOC Os07g04530.1 | TSQQPRQETLVGSDQGGAKHDLQDD  | S | 1165 |
| 2960 | LOC Os07g05050.1 | SRGFGDFDGFSSPNRGGSRDAGS    | S | 512  |
| 2963 | LOC Os07g05190.1 | GFSPSKGSRFSWSPDSGEAYTQEGL  | S | 740  |
| 2964 | LOC Os07g05190.1 | ELLTGRCAGDVVSGSEGGVDLTDWV  | S | 993  |
| 2966 | LOC Os07g05190.1 | SQEEKLSGVGGFSPSKGSRFSWSPD  | S | 730  |
| 2970 | LOC Os07g05610.1 | AAESNAREIGGSSMNGGEEVLNAET  | S | 664  |
| 2971 | LOC Os07g05610.1 | QPTGSELGGFAASFESRGPSSRKRN  | S | 476  |
| 2974 | LOC Os07g05610.1 | GIGHESNLQHLSLRNARVYSGIDLS  | S | 808  |
| 2976 | LOC Os07g05610.1 | RGFNLFDVNQPSSSGAGPSRNL SFD | S | 549  |
| 2977 | LOC Os07g05610.1 | GFNLFDVNQPSSSGAGPSRNL SFDL | S | 550  |
| 2980 | LOC Os07g05610.1 | MGRDLMIGQPTGSELGGFAASFESR  | S | 468  |
| 2984 | LOC Os07g06130.1 | VRDNLQGS AFLGSSRDLMSTKNEMS | S | 750  |
| 2985 | LOC Os07g06130.1 | RDNLQGS AFLGSSRDLMSTKNEMS  | S | 751  |
| 2987 | LOC Os07g06740.1 | SSTAPERVTIADSDLSSTPNKGGN   | S | 65   |
| 2989 | LOC Os07g07000.1 | LTDSFELPRGGSSRDGDIEMGMQAD  | S | 17   |
| 2990 | LOC Os07g07040.1 | AKIVDKKEVKLSDDDGAKSAVKSKD  | S | 66   |
| 2995 | LOC Os07g08190.1 | NRYGRNGPYGARSPVRRYRGSPRAS  | S | 497  |
| 2996 | LOC Os07g08190.1 | DKGKQTATLDNISNEGSKPSNTDGN  | S | 366  |
| 2998 | LOC Os07g08190.1 | AGIRDDPGARARSSPIRADASLTKV  | S | 392  |
| 3000 | LOC Os07g08190.1 | QQYAFARRYRTPSPERSPVRSRYND  | S | 463  |
| 3001 | LOC Os07g08190.1 | FARRYRTPSPERSPVRSRYNDGRND  | S | 467  |
| 3002 | LOC Os07g08330.1 | KAAGKAWYKTMISDSDYAEFDNFSK  | S | 387  |
| 3003 | LOC Os07g08330.1 | RKEKLD SKRTKLSPEEAAKVKAAGK | S | 367  |
| 3008 | LOC Os07g09010.1 | ITVLEMSKETERSPRPSSPAPAETS  | S | 328  |
| 3009 | LOC Os07g09010.1 | MSKETERSPRPSSPAPAETSWVKGM  | S | 333  |
| 3010 | LOC Os07g09010.1 | EMSKETERSPRPSSPAPAETSWVKG  | S | 332  |
| 3011 | LOC Os07g09340.1 | PAATAAVFRDMTSYNDLNQLAEEAR  | S | 907  |

|      |                  |                            |   |      |
|------|------------------|----------------------------|---|------|
| 3012 | LOC Os07g09384.1 | PPPPEPTLARIESTESFSLPLHKVD  | S | 232  |
| 3013 | LOC Os07g09384.1 | PEPTLARIESTESFSLPLHKVDGRA  | S | 235  |
| 3015 | LOC Os07g10350.1 | KSYIGPDSTGDTSDDEDDEIVPEEI  | S | 514  |
| 3016 | LOC Os07g10350.1 | ASVLPLQVSLDESEGSDQENDNKGQ  | S | 561  |
| 3018 | LOC Os07g10350.1 | PESRASVLPLQVSLDESEGSDQEND  | S | 557  |
| 3019 | LOC Os07g10460.1 | NDLLFKRVLVRRSYDEEEGDDIDHK  | S | 260  |
| 3020 | LOC Os07g10600.1 | GGAPVIDAAMSRSGAMDLASGLGGK  | S | 53   |
| 3026 | LOC Os07g12250.1 | YPGKGIRFIRADSQVFLFSNSKCKR  | S | 28   |
| 3027 | LOC Os07g12250.1 | IRADSQVFLFSNSKCKRYFHNRLKP  | S | 36   |
| 3028 | LOC Os07g12250.1 | RFIRADSQVFLFSNSKCKRYFHNRL  | S | 34   |
| 3030 | LOC Os07g12910.1 | AVVDDGYDEEEHSETLCGTCGGRYN  | S | 186  |
| 3031 | LOC Os07g13240.1 | DFTMPSETTIKASNVAPESEAKVED  | S | 47   |
| 3032 | LOC Os07g13340.1 | VKANNGGAKPKASNEANTTRMVNQN  | S | 1072 |
| 3033 | LOC Os07g15490.1 | DAGTCKECYEEASETEEELKREIDD  | S | 26   |
| 3034 | LOC Os07g18300.1 | EKCCDAKVRRTFSKIDLKLIERLYL  | S | 808  |
| 3037 | LOC Os07g22024.1 | NSKHGEEEDIIGSPEDEEFDHPSLR  | S | 464  |
| 3038 | LOC Os07g24020.1 | GKRELQPAYKDLSGDEVHSMVKDIS  | S | 397  |
| 3040 | LOC Os07g24020.1 | SGDEVHSMVKDISNEFGKKRKRST   | S | 409  |
| 3043 | LOC Os07g25460.1 | EKKQLEAALKMDSPDGAGGEGQSDT  | S | 353  |
| 3048 | LOC Os07g25680.1 | QEGLKSSLQPSDSAKSLETYTASKA  | S | 506  |
| 3052 | LOC Os07g25680.1 | IPREQAGSLNRLSKSDSLNSQFLI   | S | 582  |
| 3053 | LOC Os07g25810.1 | GGGIGKGGGLGGSFGKGGGLGGGFG  | S | 334  |
| 3055 | LOC Os07g26440.1 | SDSKESEVLDEGSDGSSSERGSSHG  | S | 366  |
| 3057 | LOC Os07g26440.1 | ESEVLDEGSDGSSSERGSSHGHKSH  | S | 370  |
| 3058 | LOC Os07g28430.1 | PVQLVVEDDEPDSTSGSKPASGKAT  | S | 230  |
| 3059 | LOC Os07g28800.1 | NFRSRGGFEFCTSDDEPETVFRNA   | S | 144  |
| 3062 | LOC Os07g29360.1 | PGHLLAAAGLESDAEEDDMGHPQS   | S | 1024 |
| 3063 | LOC Os07g29450.1 | RPLDDSSLYSSPSGKI IQPGSSDFH | S | 32   |
| 3065 | LOC Os07g30300.1 | WRQKATNFFSSSSFKLKQAGQSAGD  | S | 21   |
| 3068 | LOC Os07g30820.1 | YGYGFRGSPMPVSSPWGGALVENN   | S | 178  |
| 3071 | LOC Os07g30820.1 | NRGACGAPRPSLSPRVPPPPAAG    | S | 70   |
| 3072 | LOC Os07g30820.1 | GACGAPRPSLSPRVPPPPAAGYD    | S | 72   |
| 3073 | LOC Os07g30820.1 | VCNRGACGAPRPSLSPRVPPPPA    | S | 68   |
| 3074 | LOC Os07g31450.1 | LKVKKHLHPMELSPKKYKNKKQHNH  | S | 198  |
| 3075 | LOC Os07g31450.1 | SAVDDMDTGSCRSPVRDTPDPDNQK  | S | 2089 |
| 3076 | LOC Os07g31450.1 | RETFATIPNEALSDESDDEDEPKRE  | S | 1268 |
| 3078 | LOC Os07g31840.1 | KLAAAREAPYAKSRTQFTRDMQMAK  | S | 604  |
| 3079 | LOC Os07g32350.1 | DEDETRMLDHDDSDSEMHTSKRKKS  | S | 404  |
| 3080 | LOC Os07g32350.1 | DETRMLDHDDSDSEMHTSKRKKS    | S | 406  |
| 3081 | LOC Os07g32400.1 | TIKVERATRDVVSPSSQGTVRKAAG  | S | 322  |
| 3082 | LOC Os07g32430.1 | MLAAASPDARLVSPWLGGNTPRYAA  | S | 275  |
| 3084 | LOC Os07g32530.1 | RSLESDQYDGTDSEEEVASASSRAL  | S | 729  |
| 3086 | LOC Os07g32530.1 | AAASGSRGGCSDSDNYEEAEMLRQ   | S | 67   |

|      |                  |                            |   |      |
|------|------------------|----------------------------|---|------|
| 3088 | LOC Os07g33630.1 | RRGGGPMLGFDSSPGRSSMKYNGFH  | S | 593  |
| 3089 | LOC Os07g34740.1 | EERLALLLQGDKSEEEQTDGEDMEI  | S | 399  |
| 3091 | LOC Os07g35580.1 | GSFVGTLPSSGRSAPMSPNEVSITE  | S | 680  |
| 3092 | LOC Os07g35580.1 | GTLPSSGRSAPMSPNEVSITELEPR  | S | 684  |
| 3093 | LOC Os07g35580.1 | GGGDDGGGTGSYSGSFVGTLPSSGR  | S | 667  |
| 3094 | LOC Os07g36200.1 | GIDALASDLDKTSPVGRSKSEFAKG  | S | 381  |
| 3095 | LOC Os07g36200.1 | GIERSVAPVRPASHEGRVGEARGLE  | S | 225  |
| 3099 | LOC Os07g36600.1 | PRPPTPASLQPESPGVFFTAACAAA  | S | 37   |
| 3102 | LOC Os07g36940.1 | SNKNATKDTRNLSQEPQSASSAEDL  | S | 646  |
| 3108 | LOC Os07g36940.1 | VGPVAPQMSRSGSDADRWQKQKIFP  | S | 1142 |
| 3109 | LOC Os07g36940.1 | NLAGKSYVVDHPSPGRGADRPASRG  | S | 1065 |
| 3112 | LOC Os07g36940.1 | DFIGASESLDSSSIADHELPDESSE  | S | 962  |
| 3114 | LOC Os07g36940.1 | PEEKVDFIGASESLDSSSIADHELP  | S | 957  |
| 3115 | LOC Os07g37140.1 | RRRRRKAGDRGSDPPPLPDHLRCRR  | S | 282  |
| 3117 | LOC Os07g37140.1 | VTRDLPNGLMRISPGSSEPAASLPS  | S | 377  |
| 3121 | LOC Os07g37610.1 | DLNSQPEREDEQSPKSDATRLLRDN  | S | 941  |
| 3122 | LOC Os07g37650.1 | NGAASAAANKSTSPSSSLPSQSGK   | S | 449  |
| 3125 | LOC Os07g37750.1 | QADEKITLGDALSLNRATEASPASV  | S | 216  |
| 3128 | LOC Os07g38090.1 | AAHWLQGSRLRSSFNARDAAVDDL   | S | 404  |
| 3129 | LOC Os07g38090.1 | RHVPHNSGAGLLSPRASSSIDMTAA  | S | 349  |
| 3132 | LOC Os07g38160.1 | GLVVKVPEFPNDSDELEEEKETEV   | S | 562  |
| 3134 | LOC Os07g38970.1 | KALREAGVTTVVESPAKIGSTMFEIF | S | 312  |
| 3135 | LOC Os07g38970.1 | PGRRMGHAGAIVSGGKGTAKDKIKA  | S | 289  |
| 3139 | LOC Os07g39470.1 | AGCMRHDSPSSQSFTTRSGSPLSQE  | S | 90   |
| 3143 | LOC Os07g39560.1 | GSFYNGSSNRLGSPIGYVGLNDDSG  | S | 292  |
| 3144 | LOC Os07g39620.1 | AKMKLPLDLNNGSDKSAAVSGAGAA  | S | 392  |
| 3146 | LOC Os07g39620.1 | RTVQSSASPAANSPGAMESAVDKP   | S | 334  |
| 3149 | LOC Os07g39620.1 | AVSSAEQKEKAASDAADAEVESSRT  | S | 311  |
| 3150 | LOC Os07g40270.1 | RFVLGSLEGFFPSDHTSSPGNKQII  | S | 232  |
| 3151 | LOC Os07g41180.1 | AKVTDNVEKAVSSPVKPTNAADTTS  | S | 295  |
| 3157 | LOC Os07g41190.1 | ADLDRKAPLPGSSDNESDEEGRVDD  | S | 207  |
| 3159 | LOC Os07g41190.1 | EDDLVPYDEGLSSEDEGVDMVGRER  | S | 127  |
| 3161 | LOC Os07g41694.1 | EAALQAAGEGSSSPARSLTLDGAVK  | S | 22   |
| 3162 | LOC Os07g41694.1 | SQGAKRKRDDDPGSGDDDEDDGVD   | S | 455  |
| 3167 | LOC Os07g42400.1 | LVVRQIGFLRSISLLPADYKNYLRS  | S | 273  |
| 3168 | LOC Os07g42400.1 | ILTELQSGEALSDDSVMTPTTKAT   | S | 246  |
| 3170 | LOC Os07g42410.1 | PRTQPKSFIRSKSIIIESKNISKDQ  | S | 984  |
| 3171 | LOC Os07g42410.1 | RSNAEMRAKFSRSSSPVDSTYISRC  | S | 849  |
| 3175 | LOC Os07g42410.1 | IHQGTNLSRQSSSAEQELSLHGKVV  | S | 667  |
| 3176 | LOC Os07g43030.1 | FKIEPDGLKKFDSFSRWMSELPEV   | S | 369  |
| 3177 | LOC Os07g43030.1 | YTDGIRYPLLKQSSLDLFKIEPDGL  | S | 352  |
| 3182 | LOC Os07g43316.1 | QDTDMSLKKKEGSPDSIYPEKLNLD  | S | 195  |
| 3184 | LOC Os07g43316.1 | EKLNLDRSSGDESMEEDAMETKHMD  | S | 214  |

|      |                  |                             |   |      |
|------|------------------|-----------------------------|---|------|
| 3185 | LOC Os07g43316.1 | DSIYPEKLNLDRSSGDESMEEDAME   | S | 209  |
| 3187 | LOC Os07g43316.1 | LEGKSEVTLEHVSSGDESMEEDVME   | S | 246  |
| 3189 | LOC Os07g43316.1 | EVTLEHVSSGDESMEEDVMETKHVD   | S | 251  |
| 3193 | LOC Os07g43316.1 | QDIVKPSSSNPSSVGDDLQTPDDDK   | S | 161  |
| 3194 | LOC Os07g43316.1 | LESKQDIVKPSSSNPSSVGDDLQTP   | S | 157  |
| 3196 | LOC Os07g43316.1 | NTKVEHVSSGDESMEEDVMETKHVD   | S | 277  |
| 3197 | LOC Os07g43316.1 | HVDSNTKVEHVSSGDESMEEDVMET   | S | 273  |
| 3198 | LOC Os07g43316.1 | DMSLKKKEGSPDSIYPEKLNLDRSS   | S | 198  |
| 3199 | LOC Os07g43316.1 | EMITESLILKKDSNENDLMYEKDQK   | S | 71   |
| 3200 | LOC Os07g43350.1 | RFHEEPVAFEVYSPDRLVGELIFLD   | S | 754  |
| 3201 | LOC Os07g43350.1 | AMEPSPRVVLPTSPHFIDSRFHEEP   | S | 735  |
| 3203 | LOC Os07g44190.1 | ASVPVKKIKVEESAEEVEGEKSEKK   | S | 507  |
| 3208 | LOC Os07g46180.1 | RPTSSMDHNVTKSPGSNIPAVESGR   | S | 172  |
| 3212 | LOC Os07g46590.1 | VVEPEAREEGEISESEAETKYRQDK   | S | 762  |
| 3214 | LOC Os07g47030.1 | KLLSYFDGEGDISPEIMDNQNRWPV   | S | 601  |
| 3215 | LOC Os07g47100.1 | RLLLPA SGHPVTSEPPSSPKSLHSPL | S | 454  |
| 3216 | LOC Os07g47100.1 | PASGHPVTSEPPSSPKSLHSPLLTSM  | S | 458  |
| 3217 | LOC Os07g47100.1 | LPASGHPVTSEPPSSPKSLHSPLLTST | S | 457  |
| 3219 | LOC Os07g47350.1 | SLTRSSRSETLRSLQSIYEQESGSL   | S | 707  |
| 3220 | LOC Os07g47350.1 | RSSRSETLRSLQSIYEQESGSLSRR   | S | 710  |
| 3222 | LOC Os07g47360.1 | VAKTSPIESVSSSPPRISNNDKVSH   | S | 1097 |
| 3223 | LOC Os07g47840.1 | RATDGGSAADRLSDVPGKVAEDTAD   | S | 190  |
| 3226 | LOC Os07g48410.1 | HQMPMFDDGGECSRPGGGDGLFSYN   | S | 191  |
| 3227 | LOC Os07g48602.1 | TVQLGKITETVQSPVKAKPEVAFQP   | S | 119  |
| 3229 | LOC Os07g49040.1 | IPSDYRLTSPQLSPKRNQSKFKSL    | S | 310  |
| 3231 | LOC Os07g49270.1 | PLHTGREGKPIISPASTKRVGPLVR   | S | 94   |
| 3237 | LOC Os07g49380.1 | WDPRKKGATDSDSEVDFDRKRVSKG   | S | 264  |
| 3238 | LOC Os07g49460.1 | MPSLELSLKRSTGDGANAIQEEQ     | S | 416  |
| 3240 | LOC Os08g01054.1 | SDEQWRMTSGNFSPDDQRNTWLPGA   | S | 1349 |
| 3242 | LOC Os08g01100.1 | AELKAEYHNGERSDENNVGGNAGEQ   | S | 159  |
| 3247 | LOC Os08g01900.1 | SERGFPRIISSSSMDTRSDLSAIEN   | S | 527  |
| 3249 | LOC Os08g01930.1 | SAKVDEPVATENSDAAPAEASVDAV   | S | 100  |
| 3253 | LOC Os08g02410.1 | KRTPPSWLKTAAASDVEEMIMKAAKK  | S | 31   |
| 3254 | LOC Os08g02690.1 | QNAETLSLASPRSPTGGSTSALLQQ   | S | 35   |
| 3255 | LOC Os08g02690.1 | LSLASPRSPTGGSTSALLQQYEQQR   | S | 40   |
| 3257 | LOC Os08g02690.1 | DACLDRNDPNYDSDEEPYELVEAPV   | S | 118  |
| 3260 | LOC Os08g03390.1 | EKDGEEDENVASEEEDGLKID       | S | 193  |
| 3265 | LOC Os08g03840.1 | SDEPCA KDDAKQSDVAPLKEEENWE  | S | 106  |
| 3267 | LOC Os08g05540.1 | ETRVRLEDLGGESEDEDEVDKVM     | S | 135  |
| 3272 | LOC Os08g05840.1 | KSKLKRPFVEDKSDDSEDDHKPIGL   | S | 115  |
| 3274 | LOC Os08g05840.1 | KKPAVGSGTANDSDDDKPLSLKINS   | S | 149  |
| 3279 | LOC Os08g06020.1 | PPSPVPEESEEGSPSRVSESENGDS   | S | 149  |
| 3280 | LOC Os08g06070.1 | SSSMHENLKRQRSSVDDDLYDHPKH   | S | 423  |

|      |                  |                              |   |      |
|------|------------------|------------------------------|---|------|
| 3285 | LOC Os08g06140.1 | APEESTA EKDMPSDGD DAEPTGITI  | S | 514  |
| 3287 | LOC Os08g06140.1 | LRRRHAPTASSFS DGD DAEPTGITI  | S | 539  |
| 3288 | LOC Os08g06344.1 | NAGKKWTL DGEESDEEGNQEDGKKS   | S | 233  |
| 3292 | LOC Os08g08080.1 | DISPPRRRTRHDSEEPQDLSPPRRK    | S | 237  |
| 3294 | LOC Os08g08080.1 | LSRHDSKESQDISPPRRRTRHDSEE    | S | 227  |
| 3296 | LOC Os08g08080.1 | RTRHDSEEPEDLSPPRRRTRHDSHE    | S | 295  |
| 3298 | LOC Os08g08220.1 | SHRVLPPSFGRNSSANHSEFANGID    | S | 223  |
| 3301 | LOC Os08g08820.1 | DAGGLVDEFESKSCSENV D GAGDGL  | S | 82   |
| 3302 | LOC Os08g08820.1 | CSENV D GAGDGLSGDDQDPNQRP RK | S | 95   |
| 3304 | LOC Os08g08830.1 | SVLRGIEDELQFSPLENKRSATATD    | S | 167  |
| 3305 | LOC Os08g09350.1 | IFVKGFDS SLEESK IRESLEGHFAD  | S | 425  |
| 3307 | LOC Os08g10580.1 | FSKTRSGLV RINSTVESNEVSLSKT   | S | 41   |
| 3309 | LOC Os08g12760.1 | ALQENRRQQQPASPELQKPAENKAL    | S | 507  |
| 3310 | LOC Os08g13350.1 | SGPLGNQPSRNTSFGGAGS NSGPVS   | S | 74   |
| 3312 | LOC Os08g13350.1 | HGEPGKKSSGPQSGGVTPMARQNSG    | S | 133  |
| 3313 | LOC Os08g13350.1 | KMFDLHVEKSRKSGPLGNQPSRNTS    | S | 62   |
| 3315 | LOC Os08g13350.1 | PRKVSGLDPSVSMKMRATSF AHP     | S | 185  |
| 3318 | LOC Os08g14340.1 | SANMIISEGGTSGYSKILPTVLSV     | S | 392  |
| 3320 | LOC Os08g14460.1 | PAVVGNRQEAGSPQSPLGGKTDVF     | S | 320  |
| 3329 | LOC Os08g17120.1 | DMSAPAKEAIKLSDYERTLKKASSR    | S | 506  |
| 3333 | LOC Os08g20390.1 | KASGVATTGSASSRRRRARRAAVTR    | S | 142  |
| 3334 | LOC Os08g20660.1 | RRYAAADMS EDLSEGEKGENINESS   | S | 142  |
| 3335 | LOC Os08g20660.1 | REKARRYAAADMS EDLSEGEKGENI   | S | 138  |
| 3336 | LOC Os08g20660.1 | SPGDSL RDVHDISLNLKLSLDSEKS   | S | 719  |
| 3337 | LOC Os08g20660.1 | DESTRGRMPRIGSTDAIEAWASQHK    | S | 170  |
| 3338 | LOC Os08g20660.1 | LSRGVSANRKTESVENMEATTGNKW    | S | 761  |
| 3339 | LOC Os08g20660.1 | KSDDATEVSEADSPGDSL RDVHDIS   | S | 707  |
| 3343 | LOC Os08g23200.1 | SGSGSTMGGHARSILNAARVIPPND    | S | 61   |
| 3345 | LOC Os08g23360.1 | VPERLSKGVSTLSLGERKQAFLLDM    | S | 542  |
| 3346 | LOC Os08g23440.1 | KSMTGEQIQAPSSPRDGEDVAITIG    | S | 111  |
| 3347 | LOC Os08g23680.1 | YNTILNRYGISKSDLSRSKDSSGDA    | S | 246  |
| 3348 | LOC Os08g23930.1 | VNNAQRSHDRVPSP TTSARKRQKTS   | S | 143  |
| 3352 | LOC Os08g25080.1 | NINDTPMDESQASDEARYSGKN GGG   | S | 155  |
| 3354 | LOC Os08g25080.1 | SVVEDERQESGKSDDENKANDGEPS    | S | 119  |
| 3362 | LOC Os08g29124.1 | SVDQGAICPRSDSPSVASLPKEETS    | S | 704  |
| 3366 | LOC Os08g30060.1 | IEPLQKSLGKFRSENNAMRAQGAGL    | S | 162  |
| 3370 | LOC Os08g30060.1 | VEKFMAQWCSSKSFREDY EKRI LVS  | S | 355  |
| 3371 | LOC Os08g31470.1 | TNVEERQFLIGMSPAREGQEANGDL    | S | 539  |
| 3372 | LOC Os08g32100.1 | APAKKLGFGLIGSGKRTSVPSVFAE    | S | 684  |
| 3376 | LOC Os08g33320.1 | ENSNNRSTTWKSPDYNYGLPGPR      | S | 1080 |
| 3377 | LOC Os08g33320.1 | NGKHSRNGGGDVSPAALKCSWSTTC    | S | 877  |
| 3378 | LOC Os08g33380.1 | LLQVQAMRSSEESSSDEDEILSEL     | S | 62   |
| 3379 | LOC Os08g33380.1 | LQVQAMRSSEESSSDEDEILSELK     | S | 63   |

|      |                  |                            |   |      |
|------|------------------|----------------------------|---|------|
| 3380 | LOC Os08g33380.1 | QVQAMRSSEESSSDEDDEILSELKE  | S | 64   |
| 3382 | LOC Os08g34060.1 | QQADYDLMTRGVSWNRSQENELNL   | S | 167  |
| 3384 | LOC Os08g34950.1 | HQESSIGVRRVLSDGQFPVNADISD  | S | 1316 |
| 3385 | LOC Os08g35060.1 | SVLSHGRNDDDDSDAGDDGELFPIS  | S | 37   |
| 3386 | LOC Os08g35110.1 | EEGSAAGRAASFHGADEVPKGLH    | S | 46   |
| 3391 | LOC Os08g36790.1 | VDEVWRDLEREASPGAAAADGGGGG  | S | 73   |
| 3392 | LOC Os08g37104.1 | TNVKQTPRRTIPSMNHGGDRPGKEN  | S | 182  |
| 3393 | LOC Os08g37280.1 | KGRRTREGARQLSPTDGEDQASGKK  | S | 192  |
| 3394 | LOC Os08g37280.1 | SKKVRKQKGLKESPASEHMGEDTKD  | S | 146  |
| 3395 | LOC Os08g37280.1 | VRKQKGLKESPASEHMGEDTKDQHS  | S | 149  |
| 3396 | LOC Os08g37280.1 | SEHMGEDTKDQHSAEQHQLGYTAT   | S | 161  |
| 3397 | LOC Os08g37280.1 | KKELSHVNSPCDSTEEAGNLKAKTS  | S | 121  |
| 3399 | LOC Os08g37280.1 | HEAVKKELSHVNSPCDSTEEAGNLK  | S | 117  |
| 3400 | LOC Os08g37444.1 | QKKKGWFSSMFKSIAGNNVLEKSDI  | S | 326  |
| 3403 | LOC Os08g39140.1 | SLWTEKTTEKEISDDEDEEEKKDAE  | S | 220  |
| 3405 | LOC Os08g39140.1 | QALRDSSMAGYMSSKKTMEINPENA  | S | 602  |
| 3407 | LOC Os08g39390.1 | PPLREALPLLSLSPTPARRGGVVDA  | S | 99   |
| 3409 | LOC Os08g39630.1 | PGSGGRLKGQLSFSSRQGSLSMQI   | S | 206  |
| 3414 | LOC Os08g40230.1 | KPLPEVRDRDFESDFEEMHDTDEEL  | S | 114  |
| 3417 | LOC Os08g40820.1 | EVKRRLKELRKNSFMVLIPEEECAE  | S | 95   |
| 3422 | LOC Os08g41400.1 | GNVADDDGNAERSSSPPHVSEVQVG  | S | 140  |
| 3423 | LOC Os08g41400.1 | VADDDGNAERSSSPPHVSEVQVGLS  | S | 142  |
| 3425 | LOC Os08g41710.1 | SRVRKYLSPEDWSPETKGRPWYGL   | S | 298  |
| 3426 | LOC Os08g42110.1 | EVESYEKEKPGSPISLSSGLRRRP   | S | 99   |
| 3431 | LOC Os08g42600.1 | SPSPMSPPRFCASPTGNGYCSSKMA  | S | 404  |
| 3434 | LOC Os08g42600.1 | EKCAADAGYPESPRLSRFPNLPDM   | S | 890  |
| 3437 | LOC Os08g43060.1 | EQQAQDSSSIVSPIRKFEHQEQTN   | S | 518  |
| 3441 | LOC Os08g43090.1 | GKSRHCRSLSVDSFIEKLNFDDESK  | S | 252  |
| 3442 | LOC Os08g43090.1 | LPSPSGGLSRSGSLDGGGAASLFG   | S | 279  |
| 3446 | LOC Os08g43410.1 | FKGILHDVGPEHSSGGGGMGGRHA   | S | 230  |
| 3449 | LOC Os08g44420.1 | KDYPTGETPVRSEPEVPSKDAIES   | S | 357  |
| 3450 | LOC Os08g44430.1 | VGKTETLQSQADSFHRHGRELRRKM  | S | 197  |
| 3451 | LOC Os08g44480.1 | WSKGKQKEKVNSVLFDQATYDKLL   | S | 40   |
| 3452 | LOC Os08g44540.1 | EECTIAQEVNDDSDDDSGETESRTS  | S | 111  |
| 3455 | LOC Os09g01640.1 | RGRSKHRRSTKRSDEDDLEEERSK   | S | 237  |
| 3457 | LOC Os09g02810.1 | CNDILATLEKCNDAEDACDTIECV   | S | 663  |
| 3458 | LOC Os09g03600.1 | IENCEKALVEKSDSDGEDSVAPVVT  | S | 722  |
| 3459 | LOC Os09g03600.1 | KALVEKSDSDGEDSVAPVVTKLSSGE | S | 727  |
| 3460 | LOC Os09g03610.1 | PSRWSSGGGGGGSGSPPHRFSRGGG  | S | 43   |
| 3462 | LOC Os09g03610.1 | SRGGPAFGGPGFSPRSDAALVIRPT  | S | 313  |
| 3463 | LOC Os09g03610.1 | GRHMPDPDSWHPSSPRSAPHQFNNFG | S | 345  |
| 3464 | LOC Os09g06560.1 | RKSTYHDHNSNGDSEDEDLILQMESR | S | 499  |
| 3466 | LOC Os09g07294.1 | TSYLSSSPSTPESPVRLSALSGARG  | S | 521  |

|      |                  |                             |   |      |
|------|------------------|-----------------------------|---|------|
| 3469 | LOC Os09g07300.1 | ALKRLSSKSSGNSFGSGSLIPKQLK   | S | 1524 |
| 3471 | LOC Os09g07300.1 | KQVTLSELESVASHEEEALFGNLFA   | S | 548  |
| 3472 | LOC Os09g07300.1 | GSLIPKQLKNSDSLVLRTNQESNST   | S | 1540 |
| 3474 | LOC Os09g07900.1 | ATEVKELAGSSSSPSLKTGGVCNIT   | S | 3211 |
| 3477 | LOC Os09g09360.1 | QDGLEQLLPMDSDPTSVKSFTDCQL   | S | 946  |
| 3478 | LOC Os09g10710.1 | SLIDAIARLAEASDGESDEHNRVRR   | S | 366  |
| 3480 | LOC Os09g10710.1 | TESLIKEVERVFSINNPDPLEVEKA   | S | 332  |
| 3482 | LOC Os09g11240.1 | NLNLGLEDPDDSDADLSAEQQRDS    | S | 128  |
| 3484 | LOC Os09g11250.1 | QRFGFSSTPELSDKEENQRKDQEN    | S | 81   |
| 3485 | LOC Os09g12240.1 | SEIFDPTLTDRKSGEAELYQYLKIA   | S | 1151 |
| 3486 | LOC Os09g12270.1 | KRRRLKKKHPADSSDDNDDSSHRP    | S | 185  |
| 3492 | LOC Os09g13630.1 | VDSGSPEDAQAGSEDDYVQRENGSS   | S | 411  |
| 3493 | LOC Os09g14490.1 | YETCKAGAVRLISIVAMGGMGKTTL   | S | 666  |
| 3496 | LOC Os09g17730.1 | ADTEASTESDNRSDGAAEAQAEDDS   | S | 539  |
| 3499 | LOC Os09g19640.1 | IQHEIQYGGDNASASPRSQHASQST   | S | 93   |
| 3500 | LOC Os09g19640.1 | HEIQYGGDNASASPRSQHASQSTQA   | S | 95   |
| 3501 | LOC Os09g19734.1 | TVTVDDELTPGLKSILSFAVPDQQRSG | S | 91   |
| 3502 | LOC Os09g19734.1 | VDELTPGLKSILSFAVPDQQRSGKFE  | S | 94   |
| 3504 | LOC Os09g19910.1 | VGAVHDKMEHNSSPHGNNADLHKDS   | S | 56   |
| 3507 | LOC Os09g21000.1 | RRRFGKQPRRVDSLDEAMSVRGAH    | S | 108  |
| 3511 | LOC Os09g23740.1 | SYSKAIPPVRIHSFDSIFRLHQRES   | S | 1185 |
| 3514 | LOC Os09g26540.1 | SDLKGAINKDGSSEEDFTEEGLSA    | S | 50   |
| 3519 | LOC Os09g27080.1 | SFKRGEIELQIGSPRSPRGDGVGSP   | S | 64   |
| 3521 | LOC Os09g27850.1 | AAAAAAAAGGSASEGSDAEASAEAA   | S | 25   |
| 3523 | LOC Os09g28220.1 | KSMKRCIWNITPSPPRREGEDEDYG   | S | 146  |
| 3524 | LOC Os09g28220.1 | KSRSSRRKRSKQSDSEDQAPSDADL   | S | 331  |
| 3526 | LOC Os09g28220.1 | RSKQSDSEDQAPSDADLGVKEIDET   | S | 339  |
| 3529 | LOC Os09g28220.1 | PSPYRSRRDRSPSPYRDRRRQWSPY   | S | 60   |
| 3532 | LOC Os09g28220.1 | SPSPYRDRRRQWSPYHRDRGRDVER   | S | 70   |
| 3533 | LOC Os09g29070.1 | APHSIADLSRSSSSSEQQPSSTPA    | S | 48   |
| 3536 | LOC Os09g29080.1 | RAKDSDDLRLVLISEKPAEPAPAKRE  | S | 53   |
| 3538 | LOC Os09g29810.1 | FFRDKNSHERSDSPSLTADSAAKNN   | S | 1641 |
| 3539 | LOC Os09g29890.1 | TQMAVAVLDRSFSSEYPASSRTEGR   | S | 23   |
| 3541 | LOC Os09g30070.1 | EFERFDVPIQFDSPCAETKTSEALC   | S | 1035 |
| 3542 | LOC Os09g30070.1 | DSATLKQHLQCGSPDLSPTHSRNKD   | S | 376  |
| 3548 | LOC Os09g31486.1 | EITIKSSGGLSESDIEKMOVREAELH  | S | 557  |
| 3555 | LOC Os09g32430.1 | LDQRKGHDEVSRSKDGTDTEDATID   | S | 145  |
| 3556 | LOC Os09g32540.1 | KKQAADTVSRETSALQNIIEERENVE  | S | 760  |
| 3557 | LOC Os09g32540.1 | PKPGADDNKFWSPPARLPENNAEKK   | S | 936  |
| 3562 | LOC Os09g32820.1 | RLSSPSAPSSPSSAKAAAAAAHSN    | S | 39   |
| 3563 | LOC Os09g32820.1 | LEALRLSSPSAPSSPSSAKAAAAAA   | S | 35   |
| 3564 | LOC Os09g32820.1 | EALRLSSPSAPSSPSSAKAAAAAA    | S | 36   |
| 3565 | LOC Os09g33450.1 | VEGRAGMHSRRSSWGHRSGTSESMD   | S | 403  |

|      |                  |                            |   |      |
|------|------------------|----------------------------|---|------|
| 3568 | LOC Os09g33450.1 | LQQTRTPARGFMSPNMGKPVGDLEL  | S | 331  |
| 3569 | LOC Os09g33510.1 | SSSHQPSIHVRVSPNTSPPLLSSPK  | S | 486  |
| 3571 | LOC Os09g33510.1 | QPSIHVRVSPNTSPPLLSSPKIKEL  | S | 490  |
| 3572 | LOC Os09g33510.1 | NKEGTEAGHASRSPTEELLDRSKAE  | S | 289  |
| 3574 | LOC Os09g33510.1 | ASDNKKVKRGFSFGPIVPRSRSTEN  | S | 451  |
| 3580 | LOC Os09g33600.1 | ISPRDSLSLASTSARIDELDDCVEG  | S | 731  |
| 3582 | LOC Os09g33600.1 | LGKALLLQEQPTSPSDGSSRCFDRS  | S | 702  |
| 3584 | LOC Os09g33870.1 | PRRKSSDIYREESPPKRRSKDRVDS  | S | 223  |
| 3587 | LOC Os09g33940.1 | SNMVHQHEKSSGSPGEGVNLSVTDK  | S | 105  |
| 3590 | LOC Os09g33970.1 | AAEVEREEEEEEASPPRVAARNPFDL | S | 38   |
| 3591 | LOC Os09g33980.1 | LHPYQESEDDQESSEEQPAQDRREN  | S | 164  |
| 3592 | LOC Os09g33980.1 | HPYQESEDDQESSEEQPAQDRRENG  | S | 165  |
| 3601 | LOC Os09g34060.1 | AHGARPKHQHSLSMDESMSIKAEEL  | S | 138  |
| 3602 | LOC Os09g34060.1 | SMSIKAEELVGASPGTEGMSSAEAK  | S | 154  |
| 3605 | LOC Os09g34180.1 | EPHAAHTKAVLLSPGNSTALYDGDH  | S | 190  |
| 3607 | LOC Os09g35710.1 | NTESAQPVYTVDSPPSSSQPQGNLN  | S | 318  |
| 3608 | LOC Os09g35760.1 | RSLAMMGNGSGSGGDDGDSLGRGRE  | S | 80   |
| 3616 | LOC Os09g36090.1 | RGSFSKKDNNPVSPGKGEGRSPAQR  | S | 1122 |
| 3618 | LOC Os09g36090.1 | ADGVPEVNVVAISRDNSEAENAAAA  | S | 297  |
| 3620 | LOC Os09g36090.1 | RNTWGESSTHIESPLGRRPAFSSHG  | S | 1156 |
| 3621 | LOC Os09g36090.1 | GGDSGGRSWRSQSGDGGSWRPKRG   | S | 1728 |
| 3622 | LOC Os09g36090.1 | QPSKSAVLSSTQSFSGRAGQGNDAA  | S | 1318 |
| 3623 | LOC Os09g36090.1 | SSSDVDGRPRNDSLLEEGTRAGEQP  | S | 1295 |
| 3626 | LOC Os09g36270.1 | ISSKQLHRGGVDSPSWRSGAQPDNI  | S | 166  |
| 3628 | LOC Os09g36270.1 | AATQAPAAMLPRSGSRPQLDLSGAA  | S | 50   |
| 3629 | LOC Os09g36270.1 | LPRSGSRPQLDLSGAAIHGNLEDRN  | S | 59   |
| 3630 | LOC Os09g36270.1 | TQAPAAMLPRSGSRPQLDLSGAAIH  | S | 52   |
| 3631 | LOC Os09g36270.1 | YWGLGRLMTKCKSFDELLELSQRGD  | S | 292  |
| 3633 | LOC Os09g36360.1 | STLRRRRPRRGWSLKQHEDDTAASP  | S | 53   |
| 3634 | LOC Os09g36440.1 | ETSEWRTFANESSDNDPVRVGGPTN  | S | 52   |
| 3639 | LOC Os09g37230.1 | EEVASRLLNRRQPSIHPPPAFGSSTN | S | 166  |
| 3642 | LOC Os09g37520.1 | TSRGEVTPPAPPSPPRVSTWDFLNP  | S | 357  |
| 3646 | LOC Os09g37860.1 | APKKKQELLEPPSSDDSELEQQQERL | S | 47   |
| 3647 | LOC Os09g37860.1 | KKQELLEPPSSDDSELEQQQERLQEV | S | 50   |
| 3648 | LOC Os09g37860.1 | VPEEAIEKTDPPSSDDLQEQPIQSKI | S | 571  |
| 3651 | LOC Os09g38200.1 | NLVFRGAGSASSSTRQKQGEQWNE   | S | 406  |
| 3652 | LOC Os09g38200.1 | VFRGAGSASSSTRQKQGEQWNEAV   | S | 408  |
| 3653 | LOC Os09g38390.1 | NPEHEPYLDDTNSGPLERNVNSDNG  | S | 322  |
| 3655 | LOC Os09g38570.1 | EGRAAESDVNVSSPRIKEANEDAE   | S | 215  |
| 3657 | LOC Os09g38570.1 | GSIQEKLDKVENSGHVEGRAAESDV  | S | 199  |
| 3658 | LOC Os09g38620.1 | KPEEAMHINKSFSLSNGHAVYDIQH  | S | 300  |
| 3661 | LOC Os09g39210.1 | MADPASPATGELSPRTPQPFMEYVR  | S | 858  |
| 3667 | LOC Os10g02630.1 | STRDQQHAGRPRSEEPRRDERRADR  | S | 259  |

|      |                  |                            |   |      |
|------|------------------|----------------------------|---|------|
| 3669 | LOC Os10g04580.1 | KVDIAPRDGKRVSSGNLVDVARQWV  | S | 181  |
| 3670 | LOC Os10g04580.1 | VDIAPRDGKRVSSGNLVDVARQWVE  | S | 182  |
| 3671 | LOC Os10g05690.1 | QHGGGGEVEEESSEMGEKTAARTRL  | S | 41   |
| 3672 | LOC Os10g06130.1 | DDDGYYRRHRREDSDDPEEEDPDERQ | S | 37   |
| 3675 | LOC Os10g07510.1 | GSSSSRGGDDDGSDGGDLQALAREL  | S | 237  |
| 3676 | LOC Os10g08550.1 | KISGDSLKNVYKSFVSEYPIVSIED  | S | 325  |
| 3682 | LOC Os10g10990.1 | QKDQPKDEPVDNSPAKPTPSGHARG  | S | 389  |
| 3685 | LOC Os10g19200.1 | ARPRRHLPSPSPSGLPRAARATPWC  | S | 21   |
| 3688 | LOC Os10g20600.1 | TRKGANYVERQNSEISYYADDEDAN  | S | 254  |
| 3689 | LOC Os10g20600.1 | GANYVERQNSEISYYADDEDANRKK  | S | 257  |
| 3692 | LOC Os10g21000.1 | RTLQRDGAVASFSKEKTPPSPTNR   | S | 50   |
| 3696 | LOC Os10g22950.1 | TQSSNLSDILKDSFKKSDSFTRWMS  | S | 379  |
| 3698 | LOC Os10g24690.1 | DPVLVRDFFRLLSLGSEASVPRDGV  | S | 33   |
| 3700 | LOC Os10g25090.1 | RNQSFDDDDDDFSNKPVAKKSNSAS  | S | 387  |
| 3703 | LOC Os10g25110.1 | SKGRGKSchSDSSIEMNPGHMKNDN  | S | 82   |
| 3708 | LOC Os10g26140.1 | AEHVDRTLNTSSSDDIIDASGAS    | S | 481  |
| 3712 | LOC Os10g28610.1 | RDLGINKLEVSTSSVEPHEQWSNNV  | S | 1850 |
| 3713 | LOC Os10g28710.1 | IPKFSLRQNRISLELPLFERSDEV   | S | 134  |
| 3714 | LOC Os10g29400.1 | VRSLDLDIRPISPQKMAEGKIRWS   | S | 108  |
| 3715 | LOC Os10g29560.1 | MESAIPVQPKVRSPAVSAASKEPK   | S | 389  |
| 3716 | LOC Os10g29560.1 | GDYYGEEEEDESEEEQHFKRRPSS   | S | 861  |
| 3717 | LOC Os10g30100.1 | GHLVPDDMEMSRSPPEHSSAGAKQR  | S | 790  |
| 3719 | LOC Os10g31520.1 | DTATPYESAKSTSNNDEIADMAKSL  | S | 343  |
| 3728 | LOC Os10g33230.1 | KAANPSAGGRHASGGGGGGGAGGG   | S | 102  |
| 3734 | LOC Os10g34400.1 | LREKLGMSINISSSSFGAKHEDHN   | S | 341  |
| 3735 | LOC Os10g34580.1 | NLVEAKTSINLHSDQEKDEIVKPM   | S | 399  |
| 3737 | LOC Os10g34820.1 | SIDISGTSPKDRSNDLLEKHNNLLN  | S | 115  |
| 3739 | LOC Os10g34820.1 | NTQLDLETEGSSSPAATQKMKVKME  | S | 18   |
| 3740 | LOC Os10g35150.1 | RSFGEDNGMDYWSDDDEDNEKMSRSW | S | 124  |
| 3742 | LOC Os10g35220.1 | TRLPNRELPSISPADYMSRRSYL    | S | 597  |
| 3747 | LOC Os10g35450.1 | LVRSKSSDADNLSQCSSVYQCDRAG  | S | 122  |
| 3751 | LOC Os10g35690.1 | PFIYGRSVEVNLSEEEYGYDFVDRR  | S | 238  |
| 3755 | LOC Os10g36350.1 | ILDNGRSGSELSSGNVSLRSAEMGT  | S | 165  |
| 3757 | LOC Os10g36350.1 | RILDNGRSGSELSSGNVSLRSAEMG  | S | 164  |
| 3758 | LOC Os10g36350.1 | SLRSAEMGTELGSPLGRFVRNEDML  | S | 181  |
| 3761 | LOC Os10g37480.1 | LGKSSSTIENFFSGRTSTTAANS DG | S | 403  |
| 3762 | LOC Os10g37480.1 | DSFSRNHLGKSSSTIENFFSGRTST  | S | 396  |
| 3763 | LOC Os10g37480.1 | EALSMSEYQRGVSAWNFDVEDLKAQ  | S | 345  |
| 3765 | LOC Os10g37480.1 | LAKVQEVPLSSLRKSPQASPLKKS   | S | 583  |
| 3767 | LOC Os10g37630.1 | AWVAGGVLSRSL SILGLAQGGGGGG | S | 126  |
| 3772 | LOC Os10g38850.1 | NLVRLECISEIDSRNDKAKNPSVDH  | S | 1615 |
| 3773 | LOC Os10g38850.1 | KPKASDDVLCHRSLGETIEQDAETR  | S | 266  |
| 3774 | LOC Os10g38850.1 | YSRIRIPDEEDSSSQKQTCRSSASQ  | S | 1720 |

|      |                  |                              |   |      |
|------|------------------|------------------------------|---|------|
| 3777 | LOC Os10g39440.1 | DHGGDDIEDSLQSP LISRQATSVEG   | S | 370  |
| 3778 | LOC Os10g39440.1 | DAESQREGEDYGSDHGGDDIEDSLQ    | S | 357  |
| 3779 | LOC Os10g39440.1 | YGS DHGGDDIEDSLQSP LISRQATS  | S | 367  |
| 3782 | LOC Os10g39520.1 | STPTPTPPERHDSFSFPRLPAHNLQ    | S | 494  |
| 3786 | LOC Os10g40110.1 | EELNGSSSSDDESKATSAPPARSIS    | S | 236  |
| 3788 | LOC Os10g40590.1 | YDTRQSFSDTAASPD LKMRCNSGS    | S | 310  |
| 3789 | LOC Os10g40780.1 | VVDALSKLAIRPSSPESLQQLIEIA    | S | 1813 |
| 3792 | LOC Os10g41030.1 | SDRKSNYTLESV SERCIVSGRSSSP   | S | 213  |
| 3793 | LOC Os10g41030.1 | SSPHLVIPLPTISGEFIQSPKGKQL    | S | 434  |
| 3795 | LOC Os10g41030.1 | SAKSQGE PDLKNSSPHLVIPLPTIS   | S | 422  |
| 3796 | LOC Os10g41030.1 | PQKS RKRKKAPASPEQPIIAPLLKT   | S | 1198 |
| 3798 | LOC Os10g41030.1 | KHDHAIQNLEPSSSGKGLQLDVVHS    | S | 1513 |
| 3799 | LOC Os10g41030.1 | HDHAIQNLEPSSSGKGLQLDVVHSG    | S | 1514 |
| 3803 | LOC Os10g41030.1 | LSHGGDRTLVTVSSENKNGLEHGTG    | S | 733  |
| 3804 | LOC Os10g41030.1 | SHGGDRTLVTVSSENKNGLEHGTGE    | S | 734  |
| 3809 | LOC Os10g41440.1 | SGAVVTIQESLGSPDDITVEMKGTS    | S | 372  |
| 3812 | LOC Os10g41960.1 | RPYRME LR DGEASDDEEEYDTKEVE  | S | 689  |
| 3813 | LOC Os10g42196.1 | AVNSSVT LPRSYSLGNLANVKTPGP   | S | 704  |
| 3820 | LOC Os10g42439.1 | DIVPGSSVTE D ASDSETLPRISWNY  | S | 1013 |
| 3821 | LOC Os10g42439.1 | APPPQ PALVRLPSTAPALPSAPANP   | S | 2611 |
| 3823 | LOC Os10g42724.1 | VSRKMSAGVSNMSFKMKEFFQGNM     | S | 35   |
| 3824 | LOC Os10g42724.1 | RTKDGT V GK RAGSGADELLQDLDDM | S | 351  |
| 3826 | LOC Os10g43040.1 | KRKSDGIAAALRSP ELKKAKVSLGH   | S | 239  |
| 3828 | LOC Os11g01200.1 | TVVIAAPAKKLG SFFSEVATESAHR   | S | 576  |
| 3830 | LOC Os11g01300.1 | RRASTAGGSGGFSGGGGSNMLRFYT    | S | 51   |
| 3833 | LOC Os11g01836.1 | HEFRVGD KSHPLSDQIYKKLDELGL   | S | 535  |
| 3836 | LOC Os11g02620.1 | VSGLAHLECDV GSGKLRMHCDWWV    | S | 198  |
| 3837 | LOC Os11g02720.1 | LRRPLKAVQLSP SICRKLDFDSVSP   | S | 368  |
| 3838 | LOC Os11g03810.1 | IVEKMVVLGGNNSFKFAEQAWHRSE    | S | 87   |
| 3839 | LOC Os11g03890.1 | IESNPYFAV TAGSPLDVSKRARMME   | S | 39   |
| 3840 | LOC Os11g04190.1 | RKSTSSRSEAACSHGTQSHSQSMQP    | S | 227  |
| 3841 | LOC Os11g04190.1 | DEEKGAAGGGGHSPQP VVGKRKDLH   | S | 293  |
| 3844 | LOC Os11g04190.1 | HMFVWSSSASPVSERAAAAAAGAVH    | S | 317  |
| 3848 | LOC Os11g04190.1 | LQSSRNPTPRGSSFNHAEFFNIVGN    | S | 264  |
| 3850 | LOC Os11g04190.1 | HSQSMQPRVSNLSGVEIYSLQSSRN    | S | 245  |
| 3851 | LOC Os11g04190.1 | GDAKGAQAYDEYSFGNKNEKDGP TL   | S | 351  |
| 3853 | LOC Os11g04670.1 | DIIQIPTVLREYSMTSVTEGIDAIA    | S | 550  |
| 3854 | LOC Os11g04890.1 | GSAGANGRLPKPSSGDDELVLTPAP    | S | 147  |
| 3855 | LOC Os11g04890.1 | SAGANGRLPKPSSGDDELVLTPAPR    | S | 148  |
| 3858 | LOC Os11g06320.1 | HQFSSHNDNLAHSPDHNSNVRKDLV    | S | 408  |
| 3861 | LOC Os11g06440.1 | SSSHFRSLSWSVSRNWSAARQLQAI    | S | 239  |
| 3862 | LOC Os11g06440.1 | SSSSSHFRSLSWSVSRNWSAARQLQ    | S | 237  |
| 3864 | LOC Os11g06650.1 | GDASNSIITDGN SPEKIQGNQOQS    | S | 195  |

|      |                  |                            |   |      |
|------|------------------|----------------------------|---|------|
| 3866 | LOC Os11g06680.1 | RHHPPTCSDEFSSDDENHEVVQEAG  | S | 817  |
| 3870 | LOC Os11g07440.1 | IDKPRLTLERKRSFDEQSWSELHR   | S | 37   |
| 3871 | LOC Os11g07440.1 | LTLEKRSFDEQSWSELHRQNDGF    | S | 42   |
| 3872 | LOC Os11g07500.1 | MSFRDKQRVIYTSPLKALSNQKYRE  | S | 133  |
| 3873 | LOC Os11g07500.1 | QRVIYTSPLKALSNQKYRELSQEFS  | S | 139  |
| 3875 | LOC Os11g08550.1 | ETINKEKSSIMFSRNIKEVKNQIFM  | S | 1158 |
| 3877 | LOC Os11g09160.1 | KSPNPPFLMRFLSGEVSRRGRCVSK  | S | 250  |
| 3878 | LOC Os11g09160.1 | AHPSKNVIIKTESDEGGMVTAAITT  | S | 145  |
| 3879 | LOC Os11g09329.1 | SESNRPAVNRQESLPDDDFINPTAI  | S | 452  |
| 3881 | LOC Os11g10060.1 | NQLQQQLLRQQLSLNMRTPGKSAPY  | S | 316  |
| 3883 | LOC Os11g10710.1 | ELPIDHALEKLPSYNNESINLESKL  | S | 320  |
| 3886 | LOC Os11g12810.1 | QELGSREAAADLSELSEGEKDGKPD  | S | 136  |
| 3888 | LOC Os11g14220.1 | LAALEKDYEEVGSEFDDGDEGDEGD  | S | 437  |
| 3892 | LOC Os11g16400.1 | TVAAMDVRRMSSSLNMSSSLRSSG   | S | 30   |
| 3894 | LOC Os11g17060.1 | KPECPWSFGQRLSSIKPLINKVENI  | S | 79   |
| 3897 | LOC Os11g19810.1 | EKEIYGKATNTGSCASFSDVDEDIP  | S | 843  |
| 3898 | LOC Os11g19810.1 | IYGKATNTGSCASFSDVDEDIPEKA  | S | 846  |
| 3900 | LOC Os11g22180.1 | LGTCTKATNSTGSDASPPPQRRQRL  | S | 110  |
| 3902 | LOC Os11g26130.1 | NVEKFRPVSTKTSPAESSEMMKIQVV | S | 517  |
| 3904 | LOC Os11g28270.1 | GAVTNWPLSRASFIASPRWPGHSS   | S | 215  |
| 3907 | LOC Os11g28270.1 | VPAHSEVSPDNVSGRSRITHSDSQ   | S | 418  |
| 3911 | LOC Os11g31880.1 | PPWDLLYRLNRHSLQRKKSGKSRLQ  | S | 305  |
| 3915 | LOC Os11g32900.1 | PSAGPDGNCYPQSPKRLCTESRNSL  | S | 644  |
| 3916 | LOC Os11g32900.1 | TKTIKNMLAAPSSPSSPANGGSIKI  | S | 369  |
| 3917 | LOC Os11g32900.1 | IKNMLAAPSSPSSPANGGSIKIVQM  | S | 372  |
| 3918 | LOC Os11g32900.1 | APSSPSSPANGGSIKIVQMTPV TSA | S | 378  |
| 3921 | LOC Os11g32900.1 | PKSSPFSNLPDMSPKKVSSSHNVYV  | S | 870  |
| 3926 | LOC Os11g34190.1 | FIKQCVDKVFGSGDDDNTNNNAPEK  | S | 74   |
| 3930 | LOC Os11g34200.1 | ALPRRRKALPNGSDPENEESSSKM   | S | 113  |
| 3934 | LOC Os11g35050.1 | SGKSPSSPVDVFSSDDEHRHDTES   | S | 131  |
| 3935 | LOC Os11g35050.1 | GKSPSSPVDVFSSDDEHRHDTES    | S | 132  |
| 3936 | LOC Os11g35050.1 | NAILRRCSFGGNSMVS DISKQLTG  | S | 594  |
| 3940 | LOC Os11g36340.1 | KVGKKPALSQSASFARGAAAKKAA   | S | 88   |
| 3941 | LOC Os11g36340.1 | AAASVDGSVSCESPRSITNLAKLTE  | S | 314  |
| 3942 | LOC Os11g36480.1 | APHDARKTSKRKSPLFEERRNSSHF  | S | 128  |
| 3944 | LOC Os11g37100.1 | SPNGATSRDKTPSPQASERPI SIDD | S | 447  |
| 3945 | LOC Os11g37890.1 | KAEGVDLSAYGSSKVVTQAPVQLG   | S | 350  |
| 3947 | LOC Os11g37990.1 | DVELYAKLDSAYSSDEEDVEDEDDE  | S | 754  |
| 3948 | LOC Os11g37990.1 | VELYAKLDSAYSSDEEDVEDEDDEA  | S | 755  |
| 3949 | LOC Os11g38620.1 | SKHQRAVLPRLRVLDQELDRSAFE   | S | 436  |
| 3950 | LOC Os11g38870.1 | SVSTERERSRAGSGSTPATSSGLTD  | S | 237  |
| 3953 | LOC Os11g39030.1 | VAAPAMKPLAPRSPAAAAAAVVPSP  | S | 368  |
| 3957 | LOC Os11g40080.1 | LPVQDTQLRKSKSISCDSSSTMEANA | S | 133  |

|      |                  |                             |   |      |
|------|------------------|-----------------------------|---|------|
| 3958 | LOC Os11g40080.1 | WRIWPFSFKRTRSVNTVQPVSESTE   | S | 1097 |
| 3962 | LOC Os11g40090.1 | KREAI DATMAAASPKKKEKKHKKQ   | S | 62   |
| 3963 | LOC Os11g40140.1 | DGVVLAVEKRVTSPLLEPSSVEKIM   | S | 56   |
| 3968 | LOC Os11g41890.1 | KRAVPKELSPGSPMRSPVGGFNYAV   | S | 191  |
| 3970 | LOC Os11g41890.1 | GSIIYGDTTWRSGSSELDGTSPFGYG  | S | 436  |
| 3971 | LOC Os11g41890.1 | SIYGDTTWRSGSSELDGTSPFGYGL   | S | 437  |
| 3974 | LOC Os11g41890.1 | SLQYGRQLNPYYSGNSGRYNSNVSY   | S | 285  |
| 3977 | LOC Os11g42040.1 | CRMPIVVHELAVSISQKEEFGAICH   | S | 551  |
| 3981 | LOC Os11g42420.1 | ESKLFSGGKKRASLDASDAGFSSGR   | S | 103  |
| 3982 | LOC Os11g42420.1 | FGSGKKRASLDASDAGFSSGRQAVR   | S | 107  |
| 3983 | LOC Os11g42790.1 | FGGRGFVPFVPGSPTERSVP LLQGN  | S | 531  |
| 3985 | LOC Os11g42930.1 | LDSADRATVRASSMDSLPDSATAK    | S | 166  |
| 3986 | LOC Os11g42930.1 | ATAKL PDVEEALSPRSERKRKIHL Y | S | 187  |
| 3989 | LOC Os11g43590.1 | SGRADDLAWRCSSDTFDLNGRAFEN   | S | 69   |
| 3990 | LOC Os11g43610.1 | RAAALREVFGDSSDSEADDLPVGGA   | S | 25   |
| 3991 | LOC Os11g43610.1 | AALREVFGDSSDSEADDLPVGGAGR   | S | 27   |
| 3992 | LOC Os11g43970.1 | PPKRPKAEAAPASPTASVPGRIEED   | S | 39   |
| 3995 | LOC Os11g43970.1 | DQLKDLSAAPPASAGENNQRLVRPM   | S | 265  |
| 3999 | LOC Os11g47330.1 | NIEFPLPFGRVLSSTEGFIHDLDEK   | S | 244  |
| 4003 | LOC Os11g47830.1 | ERSSVLGRSPRSPPGRSHCHSHSR    | S | 294  |
| 4005 | LOC Os11g47830.1 | APDGERSWALGRSPQSPPGRSHFH    | S | 391  |
| 4007 | LOC Os11g47830.1 | PQSPPGRSHFHSHSRSRSPELRGR    | S | 404  |
| 4008 | LOC Os11g47830.1 | PSPPGRSHFHSHSRSRSPELRGRAR   | S | 406  |
| 4011 | LOC Os12g02690.1 | LETTGKDLIGSNSPRSCETPSSEPL   | S | 183  |
| 4015 | LOC Os12g05110.1 | AMTKIVGTLGPKSRSDVTISSCLKA   | S | 40   |
| 4018 | LOC Os12g05420.1 | PTYQRTLSGGLKSPRAADVPREAIL   | S | 376  |
| 4019 | LOC Os12g06380.1 | NESAEDIQCTQTSPESRVKHSILE    | S | 513  |
| 4020 | LOC Os12g06520.1 | SGGGRGHHRAHSETFLRLPDADLL    | S | 23   |
| 4022 | LOC Os12g06520.1 | GHKRSGSMDGVNSPFEGESALSGGL   | S | 130  |
| 4023 | LOC Os12g06560.1 | PTRPQHKKQYSFVSDSEEDTEKGKLV  | S | 961  |
| 4026 | LOC Os12g06560.1 | CYRPPTLSDDDFSEDENHADQQPRK   | S | 884  |
| 4027 | LOC Os12g06560.1 | AIHNDKPPPLPVSTSFSEKNAKTEN   | S | 366  |
| 4029 | LOC Os12g06560.1 | DKPPPLPVSTSFSEKNAKTENSSQN   | S | 370  |
| 4031 | LOC Os12g06640.1 | NNLP SGSLMRSNSGQMHPNPGKQG   | S | 16   |
| 4034 | LOC Os12g06640.1 | GNSSSSHGCSRRSDSHGISLDINKA   | S | 328  |
| 4035 | LOC Os12g06640.1 | SSSSHGCSRRSDSHGISLDINKAFP   | S | 330  |
| 4036 | LOC Os12g06670.1 | FLRIEEVDPTYDSDASEDGADDGDD   | S | 134  |
| 4041 | LOC Os12g06810.1 | AHEPLKLFQKGSSFLAGNLSFSRAR   | S | 379  |
| 4045 | LOC Os12g06850.1 | QNAQVSDFKYSPSPQRHNLSSERS    | S | 218  |
| 4046 | LOC Os12g06870.1 | FNKTAISPTRSTSIENGIHRDDRAS   | S | 767  |
| 4048 | LOC Os12g06890.1 | KGPLAISPTRSTSIENGIQRDDRAS   | S | 745  |
| 4051 | LOC Os12g06980.1 | SLVPVEDISAPKSPEERA IHQDDSV  | S | 2334 |
| 4053 | LOC Os12g07190.1 | CDSRSEVSLLLASETGDGKSSIYPP   | S | 392  |

|      |                  |                            |   |     |
|------|------------------|----------------------------|---|-----|
| 4055 | LOC Os12g07260.1 | AHKKDLDTSESSDEDTIDAIGLS    | S | 115 |
| 4056 | LOC Os12g07260.1 | HKKDLDTSESSDEDTIDAIGLSE    | S | 116 |
| 4057 | LOC Os12g07260.1 | PPEAHKKDLDTSESSDEDTIDAI    | S | 112 |
| 4059 | LOC Os12g07300.1 | PRLKEIDTAPLKSLDEDLDEAAREV  | S | 565 |
| 4060 | LOC Os12g07530.1 | YRDLDDPYVERSREREIDRLYAGR   | S | 318 |
| 4062 | LOC Os12g07530.1 | SPGRDHRIRRTSPYRDRRRIPDYH   | S | 133 |
| 4065 | LOC Os12g07530.1 | RQKHSNHSPRDASMEYVRRDPVNAY  | S | 443 |
| 4072 | LOC Os12g09880.1 | FSSSSGRLSAAGSTASGGSGGGWER  | S | 25  |
| 4075 | LOC Os12g10700.1 | LKMAGLLDSPNSPERKNTIEGGC    | S | 905 |
| 4078 | LOC Os12g11600.1 | RDAEGNEEEDSGSHPSAGQKRARGQ  | S | 63  |
| 4080 | LOC Os12g13170.1 | GKEKSPIKRSKGSLGSLNMITGKNS  | S | 153 |
| 4083 | LOC Os12g13770.1 | AGLTGGTRGLTGSAPVGRSRAARE   | S | 602 |
| 4084 | LOC Os12g14110.1 | ELKSKQKLEKKLSFYTKVKDAVTSL  | S | 31  |
| 4089 | LOC Os12g16350.1 | TRTAVEASSDVDSDNEDGVAGGVLQ  | S | 156 |
| 4090 | LOC Os12g17310.1 | PAPEAAHGTASSPVQKASAGKANE   | S | 588 |
| 4092 | LOC Os12g18120.1 | VDSLGFADKGSASNLENFKKYSYEI  | S | 198 |
| 4094 | LOC Os12g18860.1 | RESLDRIEPSRKSVDCFEPSRRSVD  | S | 284 |
| 4096 | LOC Os12g19040.1 | IRFESAGGESDKSPVKEIQTTFQWS  | S | 239 |
| 4098 | LOC Os12g19040.1 | PGHIRFESAGGESDKSPVKEIQTTF  | S | 236 |
| 4099 | LOC Os12g19040.1 | LPFVRHEADEEESDTSDDIVPVVVR  | S | 211 |
| 4100 | LOC Os12g19040.1 | VRHEADEEESDTSDDIVPVVVRPGH  | S | 214 |
| 4101 | LOC Os12g19040.1 | DCPSSNNRDVLPSPSSNQNNSSLPF  | S | 189 |
| 4103 | LOC Os12g19040.1 | PSSNNRDVLPSPSSNQNNSSLPFVR  | S | 191 |
| 4104 | LOC Os12g19040.1 | LLKDTDSVQPAVSTPLTETGIKGS   | S | 446 |
| 4106 | LOC Os12g21710.1 | RGSSIGGAGEDDSGEVDGAPRLVG   | S | 68  |
| 4107 | LOC Os12g21710.1 | ASAVRPARARGSSIGGAGEDDSGE   | S | 59  |
| 4109 | LOC Os12g21890.1 | SPTGKNTFSRLTSGLGRLSPKGPQ   | S | 114 |
| 4112 | LOC Os12g21890.1 | SARNDKDDVFSDEAEDGSSKGRRE   | S | 545 |
| 4113 | LOC Os12g21890.1 | DDVFSDEAEDGSSKGRREKVSARNV  | S | 551 |
| 4115 | LOC Os12g22090.1 | AKAIHQKKRKANSDPGESPLARHKP  | S | 449 |
| 4117 | LOC Os12g24080.1 | RSKIKHQHDDHHHSPVRISVRRAYIL | S | 636 |
| 4121 | LOC Os12g24080.1 | NMLRERFAHRYHSGSLFGMNSRGRR  | S | 51  |
| 4122 | LOC Os12g24080.1 | LRERFAHRYHSGSLFGMNSRGRRGE  | S | 53  |
| 4125 | LOC Os12g29660.1 | RLEAEREMLEDESEDEEEAKESKGG  | S | 696 |
| 4126 | LOC Os12g31160.1 | VSASMGVMVPLLSKLIESMEQPRFK  | S | 17  |
| 4127 | LOC Os12g32986.1 | WSANMERLMRAQSMGDMSSLDFMRS  | S | 691 |
| 4128 | LOC Os12g32986.1 | AEMNLQRDSPVSSEPIEAIEVIEPEL | S | 792 |
| 4129 | LOC Os12g33090.1 | DDEELGRLKRCSSFELRSGAANGNH  | S | 541 |
| 4130 | LOC Os12g34330.1 | DEIFLEKRNETKSLGSLGDIADV    | S | 322 |
| 4134 | LOC Os12g34330.1 | PSLEDVSPSHPNSDDEKLGAYVMKN  | S | 244 |
| 4137 | LOC Os12g34500.1 | LEAMVAQLERNNSALFGEKDELAKQ  | S | 189 |
| 4139 | LOC Os12g35030.1 | ITDETRDDEFDESPSRLDPLKFDDV  | S | 130 |
| 4140 | LOC Os12g35030.1 | GYRNRFKDLIPQSGSPRRRRAGSPP  | S | 93  |

|      |                  |                            |   |      |
|------|------------------|----------------------------|---|------|
| 4143 | LOC Os12g35620.1 | NDGNKGSGEENASEGVSDTLGNLKL  | S | 147  |
| 4144 | LOC Os12g35620.1 | LKLDDTPKNHDESSDANDEKNETIA  | S | 169  |
| 4145 | LOC Os12g35620.1 | KLDDTPKNHDESSDANDEKNETIAE  | S | 170  |
| 4146 | LOC Os12g36180.1 | LKDRNGSTKDRDSSPVQNFSRKNTT  | S | 301  |
| 4148 | LOC Os12g36180.1 | RSNQNHNHHRSSSNQAGSSSIDELE  | S | 426  |
| 4151 | LOC Os12g37430.1 | EHQRREIHLNAPSPDRAARRAAMEG  | S | 90   |
| 4155 | LOC Os12g37720.1 | LESNAELDGELDSSETGKEKHDDDE  | S | 749  |
| 4156 | LOC Os12g37720.1 | SNAELDGELDSSETGKEKHDDDESS  | S | 751  |
| 4158 | LOC Os12g37720.1 | LGRSSLLSSNSASVADDIDDLDTKK  | S | 848  |
| 4160 | LOC Os12g37840.1 | AQDIDVALARTQSAEILDDIVTRSR  | S | 627  |
| 4163 | LOC Os12g37870.1 | PLPFGRLVSPSEFIHELDEKTSSS   | S | 248  |
| 4164 | LOC Os12g37890.1 | AAVARVREEGEVSSGADDDEPLRAR  | S | 70   |
| 4165 | LOC Os12g37890.1 | AVARVREEGEVSSGADDDEPLRARF  | S | 71   |
| 4166 | LOC Os12g38000.1 | HTHHRKGPFRSLDFGERNGYLKG    | S | 31   |
| 4167 | LOC Os12g38430.1 | SYSPAPRRRDDYSASPPRKDTHPTK  | S | 175  |
| 4169 | LOC Os12g38440.1 | ESEARNIQAEQQSGIVVELMQPRGV  | S | 109  |
| 4174 | LOC Os12g38970.1 | RDQEVVRDVFGESEDEPAPYRDQQ   | S | 215  |
| 4177 | LOC Os12g38970.1 | DEEPRQTRKASSSPVEEERDQEVVR  | S | 197  |
| 4182 | LOC Os12g39370.1 | DSLLDENGQDSESEHGLVKPRYGR   | S | 107  |
| 4183 | LOC Os12g39980.1 | AVLKRQVRPSRLSFTSDIFERSGVD  | S | 613  |
| 4184 | LOC Os12g40010.1 | EANIADRLHRASDAAEASGYAFRD   | S | 692  |
| 4186 | LOC Os12g40010.1 | SWFAGRKSNKRMSPNLTSRISRSPL  | S | 551  |
| 4193 | LOC Os12g41180.1 | TTTQSVKGLSVDSSEAGDEVTSKAI  | S | 349  |
| 4195 | LOC Os12g41200.1 | SEASAERGRRSCSSEVSQLTVVKDL  | S | 1372 |
| 4196 | LOC Os12g41920.1 | LIKVNRYRIAPSSSLSEGRSSKVV   | S | 187  |
| 4198 | LOC Os12g42140.1 | DDALYGVFAEGSDYDSDDGRRRSR   | S | 54   |
| 4201 | LOC Os12g42370.1 | VDPAQPDMRHVLSDLESFDLATEGS  | S | 528  |
| 4202 | LOC Os12g42550.1 | SQPPSAAAPAKESSPVNNGQLPAGA  | S | 285  |
| 4203 | LOC Os12g42550.1 | QPPSAAAPAKESSPVNNGQLPAGAS  | S | 286  |
| 4204 | LOC Os12g42600.1 | KDELALTMSRSMNGSIMGMDLDSS   | S | 248  |
| 4208 | LOC Os12g44140.1 | HKLKDGISSITSSETDNDVNKSIK   | S | 260  |
| 4210 | LOC Os12g44330.1 | SADMFCDDIFGESPAIRKLKGDDG   | S | 566  |
| 4212 | LOC Os12g44330.1 | HHRSPDPADPAASPKRRRRHRRRR   | S | 28   |
| 4213 | LOC Os12g44330.1 | TGVSGLGEGTPKERSADMFCDDIF   | S | 551  |
| 4215 | LOC Os12g44340.1 | LSKTNGFLSKRPSFQMRSSVSTTTT  | S | 389  |
| 4216 | LOC Os12g44360.1 | RPEIADLQRSASLISQLELPRTQ    | S | 963  |
| 4218 | LOC Osm1g00400.1 | LRNKRRSIKRNLQRENLSNIKSQ    | S | 44   |
| 4228 | LOC Os01g06290.1 | RSPADHERRDMSTAANGRSPSPRDY  | T | 296  |
| 4230 | LOC Os01g08560.1 | ETDDAPNEAASGTDVNMQEAAPAD   | T | 529  |
| 4232 | LOC Os01g12660.1 | TSSFPKLKRNASSTSSDMSSLASQGP | T | 217  |
| 4236 | LOC Os01g14440.1 | DQERGDSPDAPSTAAAWLPGRAMAP  | T | 251  |
| 4237 | LOC Os01g16100.1 | MAAPQSHSHPAKTLRASPPPPSTAG  | T | 46   |
| 4243 | LOC Os01g16870.1 | EMSETSSSHGGHTSAGSAPVPELPR  | T | 880  |

|      |                  |                             |   |      |
|------|------------------|-----------------------------|---|------|
| 4247 | LOC Os01g20940.1 | VCPICSKNVGLSTSSLKLHLQKAHK   | T | 868  |
| 4248 | LOC Os01g23540.1 | QCDKRSLDMVEHTPSPATAELPKK    | T | 770  |
| 4249 | LOC Os01g27730.1 | PHEKLLSLYRVPTFTSVDDFLQKVA   | T | 522  |
| 4252 | LOC Os01g32660.1 | ETPVDKFLTASGTFKDGE LR LNQRG | T | 30   |
| 4253 | LOC Os01g32720.1 | NIDDISRKFSPTDFEVNRQHFTAP    | T | 851  |
| 4257 | LOC Os01g36860.1 | GKVGKVDLDRSPTPDQKSGPYSPAY   | T | 711  |
| 4262 | LOC Os01g38950.1 | LQSSEAEPSSRSTPDASPGTFQRSA   | T | 412  |
| 4263 | LOC Os01g40050.1 | KSDFRELEHDSSETDDYPDDENEEDF  | T | 284  |
| 4273 | LOC Os01g49020.1 | AFLAGMVTKGSLTLNKA AVIASSQC  | T | 49   |
| 4275 | LOC Os01g49250.1 | ADSWSVRSEYGSTLDDDDQRYADAAE  | T | 69   |
| 4278 | LOC Os01g50310.1 | PAKSYATVAAEKTVPDGSVAEDEV    | T | 144  |
| 4280 | LOC Os01g53000.1 | RPPRARRMQRTMTTPGTLAELDEER   | T | 50   |
| 4283 | LOC Os01g53000.1 | LAELDEERAGSVTSDVPSSLASDRL   | T | 67   |
| 4287 | LOC Os01g55040.1 | QRPRRRLERGTSTVSQ LFKGQEDGA  | T | 1065 |
| 4288 | LOC Os01g56100.1 | IPSDSEKANLHITSDDDDKEVEDWL   | T | 352  |
| 4291 | LOC Os01g57450.1 | AAQAASAAAIHPTSPRYFFSSLAGT   | T | 42   |
| 4294 | LOC Os01g62650.1 | ELNMFRSGSAPPTIEGSLNAISGLL   | T | 65   |
| 4297 | LOC Os01g67160.1 | LGRAFTVPMKSYTHEIVTLWYRAPE   | T | 170  |
| 4298 | LOC Os01g67250.1 | QVNNVEGVTEQLTDNEKETAVVEKA   | T | 778  |
| 4303 | LOC Os01g70020.1 | RPAKGVSKPSQDTEEDDEPEVELES   | T | 334  |
| 4304 | LOC Os01g70810.1 | LFAMKDTIGKKETREISASFGVTVT   | T | 103  |
| 4309 | LOC Os02g02360.1 | RDALKESEQSIETSSAAPSIDDDKI   | T | 289  |
| 4310 | LOC Os02g03030.1 | NIARFINGINNHTPDGRKKQNLKCV   | T | 308  |
| 4311 | LOC Os02g03060.1 | LARAFGIPVRTFTHEVVTLWYRAPE   | T | 244  |
| 4314 | LOC Os02g04270.1 | AHESKDGDGAEVTKDGDSDSDSDGM   | T | 986  |
| 4317 | LOC Os02g05310.1 | PTPGQIASRGPMTPEQYQLLRWERD   | T | 356  |
| 4318 | LOC Os02g05310.1 | PERHDPFAAGEATPDPSVRTYADAM   | T | 139  |
| 4319 | LOC Os02g05310.1 | QPIRTPARKLLATPTPLGTPLYAIP   | T | 412  |
| 4320 | LOC Os02g05310.1 | ARKLLATPTPLGTPLYAIP EENRGQ  | T | 418  |
| 4323 | LOC Os02g05310.1 | ATPKLPGLVTPTPKKQRSRWDETP    | T | 298  |
| 4324 | LOC Os02g05310.1 | ATPSVRRNRWDETPTPGRMADADAT   | T | 256  |
| 4325 | LOC Os02g05310.1 | PSVRRNRWDETPTPGRMADADATPA   | T | 258  |
| 4326 | LOC Os02g05330.1 | YLGVKVHACVGGTSVREDQRILASG   | T | 147  |
| 4327 | LOC Os02g08190.1 | KPSAAKSSAAAATPASIDAIDRHRLR  | T | 53   |
| 4328 | LOC Os02g08500.1 | SRVHSSSADPFSTLVGESPPQFIDL   | T | 424  |
| 4331 | LOC Os02g13840.1 | QQVYTGVLWRHYTPVRERVPASQGE   | T | 468  |
| 4333 | LOC Os02g15220.1 | PNPSPSSSPLAQT LASIRRSIRRPE  | T | 70   |
| 4334 | LOC Os02g17320.1 | DRYFGTDDYQSSTPFFCDEKNRVRL   | T | 476  |
| 4337 | LOC Os02g18660.1 | EEEEEEEDSDTDYAQGFQLRKVGG    | T | 74   |
| 4341 | LOC Os02g20970.1 | HSSPERGESESPTKRHLRKKAVH MV  | T | 624  |
| 4342 | LOC Os02g21150.1 | RTTSEVFLRAMRTTLPKVQQSGISL   | T | 154  |
| 4343 | LOC Os02g26140.1 | VQVAAAAASVSKTRRCTFSPSRLVS   | T | 320  |
| 4344 | LOC Os02g28980.1 | MISKLSKLEDSETEGGTTQAPSKKH   | T | 612  |

|      |                  |                            |   |      |
|------|------------------|----------------------------|---|------|
| 4345 | LOC Os02g33360.1 | KYKVKVADVPGTGSSMDGEVKQAP   | T | 88   |
| 4346 | LOC Os02g33770.1 | MNKMLSESGGPTAEKSPSTPGMRD   | T | 325  |
| 4348 | LOC Os02g34270.1 | PPPSRSVAAATTTLLGGSHGSNGA   | T | 199  |
| 4349 | LOC Os02g34270.1 | PPPSRSVAAATTTLLGGSHGSNGAD  | T | 200  |
| 4351 | LOC Os02g34680.1 | PRNVLYEDDSEETEEEGDNVGDGAR  | T | 315  |
| 4367 | LOC Os02g45070.1 | TSDSGSMASGAHTRGGGPLPGARST  | T | 1045 |
| 4368 | LOC Os02g45070.1 | AAFRARFYMEPDTSDSGSMASGAHT  | T | 1033 |
| 4370 | LOC Os02g47130.1 | VEIPQADLTGDKTSEEDLNEVKEG   | T | 399  |
| 4373 | LOC Os02g48010.1 | EVKKDDGQGSVTVGGTRKRRFAGA   | T | 965  |
| 4378 | LOC Os02g49450.1 | DGLDDDFDKIDGTSGLESDDDDDDKE | T | 280  |
| 4380 | LOC Os02g50970.1 | NKTFLSSRSTAGTAEWMAPEVLRNE  | T | 999  |
| 4381 | LOC Os02g52250.1 | PVPVMHSPRPVTVKDQQDWKIPPC   | T | 253  |
| 4387 | LOC Os02g54110.1 | EDGDNMSMTRATRQSRWNHTQMFS   | T | 1044 |
| 4388 | LOC Os02g54110.1 | DTGELPQTTPRSATGDDELSLMDGEP | T | 17   |
| 4390 | LOC Os02g54500.1 | LLRSGRDFENASTDSEKLSRFLSY   | T | 931  |
| 4392 | LOC Os02g57080.1 | IEGARDPRFALSTGGHAQSPALQNR  | T | 698  |
| 4395 | LOC Os02g58080.1 | DAEMELVSLNGGTTPRGGSPKDPDAT | T | 34   |
| 4398 | LOC Os03g01470.1 | RRGPHGDGSAEPTARAAAASARRRL  | T | 113  |
| 4403 | LOC Os03g04710.1 | TIQSFTQRGGASTDEEEEEDDDDGD  | T | 118  |
| 4405 | LOC Os03g05390.1 | PAGPEVVADDEVTSHRFTPARMSHV  | T | 230  |
| 4406 | LOC Os03g06340.1 | PPPQPQQQPRVETPPPPSYGFHNLD  | T | 95   |
| 4408 | LOC Os03g11140.1 | SADETDFCSDDETLIEKLENNKTDL  | T | 550  |
| 4409 | LOC Os03g11580.1 | LLESKSPDGVGQTFRAQPGVKLGIS  | T | 424  |
| 4414 | LOC Os03g15050.1 | ELHSLQRKRSAPTPIKDGASSPFA   | T | 53   |
| 4417 | LOC Os03g15810.1 | AGADQPRRSPQETTAAPSKPADEV   | T | 57   |
| 4419 | LOC Os03g16369.1 | KGTDKHLPSQVRTDSSGEEEGSRAR  | T | 540  |
| 4423 | LOC Os03g17980.1 | LSNMHDGHFLKTS CGSPNYAAPEV  | T | 216  |
| 4428 | LOC Os03g21530.1 | GSDLSGEEVDNDTKKSKREETNGGG  | T | 734  |
| 4429 | LOC Os03g22320.1 | AIAAQLQQNALLTRKMNSTKDDSSS  | T | 428  |
| 4431 | LOC Os03g22880.1 | VAHANGDAEENGTPKKKKKKNREVS  | T | 516  |
| 4433 | LOC Os03g27260.1 | KVSKAPKIQRLVTPLTLQRKRARIA  | T | 185  |
| 4435 | LOC Os03g27260.1 | KKGDNDLPGLTDTEKPRMRGPKRAS  | T | 129  |
| 4439 | LOC Os03g30460.1 | IVDGEVNDEYMKLTETLSRKIKFIE  | T | 184  |
| 4441 | LOC Os03g31750.1 | AAAGILTARGGMTSHAAVVARGWGK  | T | 467  |
| 4443 | LOC Os03g33110.1 | TDVVVVPRSREATPSGPVGD LAPAR | T | 196  |
| 4444 | LOC Os03g40010.1 | SSSKKFDDDDITPSKKRNKALEYD   | T | 479  |
| 4445 | LOC Os03g40110.1 | ARDWEQSDDDEVTV EEDEMEGLKQK | T | 445  |
| 4447 | LOC Os03g43800.1 | SGDRMFLSPVKSTDRKNADSEMGSS  | T | 352  |
| 4451 | LOC Os03g46046.1 | LGGQLRSTVGTGTLREELRSRRSR   | T | 42   |
| 4452 | LOC Os03g46570.1 | QVWRDLAQSN EATANALRGELEHVL | T | 217  |
| 4456 | LOC Os03g49170.1 | AANSMLSPVSSPTAEDARSPSAAVM  | T | 232  |
| 4457 | LOC Os03g50330.1 | HKSAEDPDGSFYTGDDPDRSFYDRD  | T | 52   |
| 4458 | LOC Os03g50480.1 | IRERVGADGSKATGAFILTASHNPG  | T | 116  |

|      |                  |                            |   |      |
|------|------------------|----------------------------|---|------|
| 4460 | LOC Os03g51020.1 | RHHKLDDAQEEDTGTTLDDEEAAAL  | T | 744  |
| 4461 | LOC Os03g51230.1 | KMETIADVEGVDPDEEEPVEEKKK   | T | 210  |
| 4462 | LOC Os03g51520.1 | KKQKLISRAEQPTGHNSSDQDELRT  | T | 762  |
| 4463 | LOC Os03g51600.1 | TKRTIQFVDWCPTGFKCGINYQPPS  | T | 349  |
| 4464 | LOC Os03g52310.1 | QEHKLALTPAVGTDNDGEGTVERPS  | T | 137  |
| 4467 | LOC Os03g53630.1 | PSLKKARDTSSDTELEQPKMSSGKK  | T | 368  |
| 4468 | LOC Os03g53920.1 | DTQYEDVEMRDATDDEDLEVKHVHD  | T | 838  |
| 4470 | LOC Os03g54780.1 | PDMQEAKTMPPSTGTVKKLKVAEGT  | T | 663  |
| 4471 | LOC Os03g54780.1 | MQEAKTMPPSTGTVKKLKVAEGTMP  | T | 665  |
| 4475 | LOC Os03g60530.1 | SIARDIKQRLSETDSKPEDRTIKIK  | T | 184  |
| 4477 | LOC Os03g61930.1 | LQSKTKEHASDGTSSVLEPEVELSH  | T | 499  |
| 4481 | LOC Os03g63940.1 | DFDQINTILSPSTPGSRMNMDVDND  | T | 117  |
| 4482 | LOC Os03g64320.1 | IRDGDPGGKSPPTLEVTDGKKADVE  | T | 1000 |
| 4486 | LOC Os04g06770.1 | DMSDASSSQGGHTSVGSPVPELPR   | T | 887  |
| 4487 | LOC Os04g09860.1 | DKDADVDPLQRSTPDDTEPNSEENM  | T | 161  |
| 4489 | LOC Os04g17064.1 | LVEQMLEPGKRVTIAMGTNRDITTA  | T | 213  |
| 4490 | LOC Os04g21220.1 | LFAGSVWGFQMVTTRRNVNTGEGNQ  | T | 307  |
| 4492 | LOC Os04g23060.1 | RDNTSAINIAKNTVQHSRTRHIDIR  | T | 646  |
| 4493 | LOC Os04g23330.1 | IYGSRRRREPSSTRYRETLPDKAI   | T | 100  |
| 4495 | LOC Os04g24210.1 | KKFVSQLGVMSTSRPMDLYCDNSG   | T | 621  |
| 4496 | LOC Os04g26660.1 | RIDDLFDQLKGTTFVFSKIDLRSGYH | T | 925  |
| 4497 | LOC Os04g28090.1 | TATRALLSSYSQTPRLGMTPLRTPQ  | T | 342  |
| 4503 | LOC Os04g34450.1 | AAATRKALTNVQTLPRGVEVLDPLG  | T | 174  |
| 4506 | LOC Os04g35800.1 | PRKRRLSPTSPTRRSSRSRSRSPR   | T | 60   |
| 4510 | LOC Os04g38570.1 | SGSLRNLSYSYSTGADGRIEMVSNA  | T | 655  |
| 4511 | LOC Os04g38870.1 | NLTLWTSDisEDTAEIIEAPKRDS   | T | 246  |
| 4512 | LOC Os04g39240.1 | TSTRSFAFPVLQTEWNSSPVKMAKA  | T | 631  |
| 4513 | LOC Os04g41100.1 | GMDSEYEVRRSETPEPVKPPHRCIN  | T | 342  |
| 4514 | LOC Os04g42320.1 | LKQQEDTPPEDTDEDLSLKDIVSP   | T | 534  |
| 4516 | LOC Os04g42320.1 | HNLKKSHKLDTSTDSEVVDHSAVN   | T | 394  |
| 4518 | LOC Os04g42320.1 | EDILVSRELSPETDDGDNKLPPETG  | T | 421  |
| 4524 | LOC Os04g52460.1 | QVKEAHNDEDDGTGSDGFELIDVKE  | T | 55   |
| 4526 | LOC Os04g52820.1 | LSVVEKEHPRSLTPMLWAKKIYSNL  | T | 168  |
| 4529 | LOC Os04g53670.1 | KLSRQNSFGSIGTPRTPNLHSTTDA  | T | 1133 |
| 4530 | LOC Os04g54564.1 | GHDERRRRLASSTVGFPPRYLRHWP  | T | 66   |
| 4533 | LOC Os04g56620.1 | PSHLFPSAKSVSTDLSQVPASQNT   | T | 242  |
| 4536 | LOC Os04g56740.1 | AQLKFEELTSNLTVSRNSLDGANK   | T | 563  |
| 4538 | LOC Os04g59570.1 | RPLRSRRALSVFTCAAPPRQRPPPG  | T | 28   |
| 4540 | LOC Os05g02670.1 | EEEYLVDEPSCSTPRRRQIDLPSME  | T | 988  |
| 4541 | LOC Os05g02680.1 | TASDAKKQKTDSTASGEDKDSEDPA  | T | 1236 |
| 4543 | LOC Os05g03120.1 | NETDSAGITPRTTTPERSPKVTERR  | T | 45   |
| 4546 | LOC Os05g03550.1 | AADVIPSDPCGKTGSGIDVDIEQRE  | T | 489  |
| 4548 | LOC Os05g05300.1 | SVFRESEDDDELDTEDDELWGPDKE  | T | 500  |

|      |                  |                            |   |      |
|------|------------------|----------------------------|---|------|
| 4549 | LOC Os05g05370.1 | CDHYECSFRKDKTPDKIRYYSRANI  | T | 281  |
| 4551 | LOC Os05g08840.1 | DTDDALGDPASGTDENMQESKCSAD  | T | 528  |
| 4556 | LOC Os05g12100.1 | RGSVQHCRHAQHTTSTPRRPACPEG  | T | 131  |
| 4557 | LOC Os05g14940.1 | QEHKLLLTTPAGGTDNDGEGTVERPS | T | 137  |
| 4558 | LOC Os05g22390.1 | RYCKWHNSRSHSTNDCKLFRQQIQV  | T | 253  |
| 4559 | LOC Os05g22580.1 | DTGDAVLPASRITADRHLSPCKIM   | T | 16   |
| 4561 | LOC Os05g23940.1 | EARESDVENNITTPPKNIIGDKHST  | T | 372  |
| 4563 | LOC Os05g28190.1 | KDADNKGQSSSPTPLFSFKNLSSGQ  | T | 250  |
| 4564 | LOC Os05g28190.1 | TDKSAGSSEVAETEKDGSCLKGSDE  | T | 133  |
| 4566 | LOC Os05g32360.1 | ARSFSNDHNGNLNTRVITLWYRPPE  | T | 198  |
| 4568 | LOC Os05g33310.1 | STPVDLSPLSPSTKAMTLWQAPPPQ  | T | 249  |
| 4569 | LOC Os05g34790.1 | VDLSDSGSEDHGTRQHEAKPKLCSG  | T | 164  |
| 4571 | LOC Os05g37480.1 | DEGGRVTARGGWTGWTGAAVSMRQ   | T | 104  |
| 4575 | LOC Os05g42230.1 | HPASPVAGGEKATPPSTPPPVRLAG  | T | 16   |
| 4576 | LOC Os05g42230.1 | PVAGGEKATPPSTPPPVRLAGGAAA  | T | 20   |
| 4577 | LOC Os05g42300.1 | GYDGSGENDEDDQTDPEFSDDKEAE  | T | 374  |
| 4579 | LOC Os05g43380.1 | QSPISKESFQQTTPPHIRATNRDTH  | T | 258  |
| 4580 | LOC Os05g43520.1 | KSLAIEPKIHSETDEDEVDEWPDDD  | T | 377  |
| 4581 | LOC Os05g44320.1 | DGVLDLFLNSKKMTDAGALDLIDDED | T | 668  |
| 4582 | LOC Os05g46780.1 | PRSSRSAAHGEDTSSVTDAAARSVD  | T | 301  |
| 4584 | LOC Os05g48820.1 | ERTYTEDPYPNETMRAELSVKLGLT  | T | 84   |
| 4585 | LOC Os05g50160.1 | ERAKGGPAPALPTATGGGKRLLEET  | T | 186  |
| 4586 | LOC Os05g50480.1 | ADEHVASSTKSDTENVDVAPVQQPE  | T | 490  |
| 4587 | LOC Os05g50480.1 | VAPAADEHVASSTKSDTENVDVAPV  | T | 486  |
| 4588 | LOC Os05g50530.1 | SARNLPKDIPLPTESVSRGKRRAVS  | T | 177  |
| 4591 | LOC Os06g01700.1 | DESEDDDDDDDDTEALMAELERIKK  | T | 133  |
| 4593 | LOC Os06g02510.1 | PRRARVKVAGDSTPEELATATQVQG  | T | 139  |
| 4594 | LOC Os06g03780.1 | EQSREYLALHPQTSLEPRLIEEHF   | T | 529  |
| 4595 | LOC Os06g04660.1 | DDPELLNIIPLETAVQETGRSSDEG  | T | 425  |
| 4597 | LOC Os06g05190.1 | PRSDDAQYDSDDTIEMTEEEIDLAC  | T | 325  |
| 4599 | LOC Os06g05660.1 | DEDEPILEKAIGTEIEWYPGKNLTQ  | T | 214  |
| 4603 | LOC Os06g06830.1 | ERRRNDRSAPHATEGASSSRVSPQH  | T | 119  |
| 4607 | LOC Os06g11610.1 | PLRRYDVVDESGTDSGDEYDATDDG  | T | 79   |
| 4608 | LOC Os06g11610.1 | ESGTDSGDEYDATDDGRRLTVPFFF  | T | 88   |
| 4609 | LOC Os06g13390.1 | KKVYLNEENIYITKTTQSVVKLFQ   | T | 155  |
| 4610 | LOC Os06g13680.1 | AEHGLRNYVRDKTPEIMPAINKFFT  | T | 56   |
| 4612 | LOC Os06g14412.1 | SQAPYDASDKEDTAADLIGPKQATL  | T | 2483 |
| 4614 | LOC Os06g17840.1 | VEGAKKRDDSDVDELVTSPASVKTP  | T | 1275 |
| 4617 | LOC Os06g22820.1 | QVPESKDEDDSTEewanFRGGDS    | T | 444  |
| 4620 | LOC Os06g30570.1 | VNENERTNVNEPTNVNENERTNMNE  | T | 15   |
| 4623 | LOC Os06g34710.1 | EVTTPATEKVEVTTTATEEAKITTA  | T | 895  |
| 4624 | LOC Os06g34710.1 | VTTTATEKVEVTTTATEEAKITTA   | T | 896  |
| 4630 | LOC Os06g37770.1 | PMAVGDAATAVSTLSCRAPRRRSS   | T | 72   |

|      |                  |                            |   |      |
|------|------------------|----------------------------|---|------|
| 4634 | LOC Os06g49500.1 | LDPLLVEDEDPPTPKTQESSFTGSI  | T | 399  |
| 4636 | LOC Os06g50890.1 | ITVEKSRRGRPTPTPGSYLGHRD    | T | 148  |
| 4637 | LOC Os06g50890.1 | VEKSRRGRPTPTPGSYLGHRD      | T | 150  |
| 4639 | LOC Os06g51250.1 | TDAFARFDSMKSTDYNSRGYSFDED  | T | 1149 |
| 4642 | LOC Os07g02230.1 | LIENDDGSCGSETKNVYHEILDAT   | T | 1401 |
| 4649 | LOC Os07g08190.1 | KHSSKKDPDNTKTISLEKDSTLEDA  | T | 341  |
| 4650 | LOC Os07g08190.1 | FTQQYAFARRYRTPSPERSPVRSRY  | T | 461  |
| 4652 | LOC Os07g09384.1 | PPPEPTLARIESTESFSLPLHKVDG  | T | 233  |
| 4655 | LOC Os07g12910.1 | VDDGYDEEEHSETLCGTCGGRYNAN  | T | 188  |
| 4656 | LOC Os07g13340.1 | GAKPKASNEANTTRMVNQNNVPMLG  | T | 1078 |
| 4657 | LOC Os07g18300.1 | PLEKCCDAKVRRTFSKIDLKLIERL  | T | 806  |
| 4659 | LOC Os07g25460.1 | KFEELQPLEEFTTPSSPDNSKSPV   | T | 574  |
| 4661 | LOC Os07g28800.1 | GNFRSRGGFEFCTSDDEPETVFRN   | T | 143  |
| 4667 | LOC Os07g36420.1 | KDAGAAKNPEVETSSSIHRSENPG   | T | 167  |
| 4669 | LOC Os07g37140.1 | NVNASPASPPAATSDVTRDLPNGLM  | T | 362  |
| 4670 | LOC Os07g37750.1 | PVKAPDADGADKTDDEENPMMETVR  | T | 1457 |
| 4671 | LOC Os07g38730.1 | SLRFDGAINVDVTEFQTNLVPYPRI  | T | 253  |
| 4672 | LOC Os07g38730.1 | DGAINVDVTEFQTNLVPYPRIFML   | T | 257  |
| 4674 | LOC Os07g40270.1 | LGSLEGFFPSDHTSSPGNKQIILQG  | T | 235  |
| 4675 | LOC Os07g41180.1 | NVEKAVSSPVKPTNAADTTSPNDKN  | T | 300  |
| 4676 | LOC Os07g42300.1 | DDDDVDLFGETEETEEKAAEERAA   | T | 115  |
| 4677 | LOC Os07g42300.1 | VKVESTAVPSASTPDVADAKAPAAD  | T | 89   |
| 4678 | LOC Os07g42950.1 | IVKKGENDLPLGLTDTEKPRMRGPKR | T | 127  |
| 4679 | LOC Os07g43316.1 | TIPDYLEGKSEVTLEHVSSGDESME  | T | 241  |
| 4684 | LOC Os07g48020.1 | FASNAAAFSSAFTTAMVKMGNISPL  | T | 289  |
| 4685 | LOC Os07g49270.1 | APWEKEIITDPSTPKPNPNFYEQ    | T | 256  |
| 4688 | LOC Os08g01620.1 | RTLVPVQKRLTNVAVVRLRKHGQ    | T | 15   |
| 4690 | LOC Os08g02690.1 | AETLSLASPRSPTGGSTSALLQQYE  | T | 37   |
| 4694 | LOC Os08g07830.1 | DIAKLLEAGQEATARIRVEHIREE   | T | 61   |
| 4695 | LOC Os08g08080.1 | KESQDISPPRRRTRHDSEEPQDLSP  | T | 233  |
| 4697 | LOC Os08g08220.1 | SRQQFKAYAAAGTLKQNYANILLML  | T | 692  |
| 4699 | LOC Os08g14340.1 | KSANMIISEGGGTSGYSKILPTVLS  | T | 391  |
| 4701 | LOC Os08g19320.1 | AGDTSAAAAVAPTPARLREALAALS  | T | 35   |
| 4703 | LOC Os08g24760.1 | TEEVDEDDGNDTDEEQERIRDQQE   | T | 171  |
| 4705 | LOC Os08g25570.1 | SRLWSSGAYESDTEPDNMKTETND   | T | 431  |
| 4706 | LOC Os08g25850.1 | KIDSETKSNQPTKKASSKPAPKKN   | T | 45   |
| 4707 | LOC Os08g27040.1 | ADEGHGAISLRDTSPILDTMESGRR  | T | 297  |
| 4708 | LOC Os08g27150.1 | RRPTKSAPSNLLTKREALQRSIEVQ  | T | 686  |
| 4712 | LOC Os08g29650.1 | QSKEVRYTARSITPPADRNGTSKSK  | T | 15   |
| 4713 | LOC Os08g33370.1 | LRDNLTWTSDLTEDGGDEVKEASK   | T | 237  |
| 4717 | LOC Os08g39140.1 | ISYPISLWTEKTTEKEISDDEDEEE  | T | 215  |
| 4720 | LOC Os08g40230.1 | RDFESDFEEMHDTDEELDNLYNARQ  | T | 122  |
| 4722 | LOC Os08g42600.1 | VYVSPLRTSKMDTLLSPSSKSYAC   | T | 925  |

|      |                  |                            |   |      |
|------|------------------|----------------------------|---|------|
| 4725 | LOC Os08g44420.1 | QSSYKDYEPTGETPVRSEPEVPSKD  | T | 353  |
| 4726 | LOC Os09g01640.1 | SSSRGRSKHRRSTKRSDTEDDLEEE  | T | 234  |
| 4727 | LOC Os09g01640.1 | RSKHRRSTKRSDTEDDLEERSKDK   | T | 239  |
| 4728 | LOC Os09g07170.1 | ASSSKAPKKTMTFIMLLNKYEKQG   | T | 260  |
| 4729 | LOC Os09g07294.1 | KAVTSYLSSSPSTPESPVRLSALSG  | T | 518  |
| 4730 | LOC Os09g07900.1 | RDGIGSVWSSSGTPSRDLHTFSFGT  | T | 2230 |
| 4731 | LOC Os09g16980.1 | GMCTRMTGQDRPTMREVEMGLENLR  | T | 584  |
| 4734 | LOC Os09g23790.1 | TSAPTAPRQRIATCDEVSVKEEDAL  | T | 780  |
| 4735 | LOC Os09g26820.1 | DDLRLRLAPPSPATVGSPPRTSSASG | T | 70   |
| 4739 | LOC Os09g33450.1 | SIDGGSDMGNGQTPQQLRLPRTKDV  | T | 130  |
| 4742 | LOC Os09g33600.1 | TLGKALLLQEQTPSPDGSRCFDR    | T | 701  |
| 4746 | LOC Os09g36160.1 | RPRARPSATTPTTSSGDQQMVTVAE  | T | 180  |
| 4748 | LOC Os09g36160.1 | KRPRARPSATTPTTSSGDQQMVTVA  | T | 179  |
| 4749 | LOC Os09g37520.1 | PADIPSTSRGEVTPPAPPSPRVST   | T | 351  |
| 4751 | LOC Os09g39870.1 | LAMRDCMENGFLTDDGVVHTVFDGN  | T | 616  |
| 4754 | LOC Os10g26140.1 | NLAEHVDRTLNTSSSDDDIIDASG   | T | 479  |
| 4757 | LOC Os10g31520.1 | EDTATPYESAHOSTNNDEIADMAKS  | T | 342  |
| 4759 | LOC Os10g34370.1 | NCRIQWFAKKGETFKGEELLDAMES  | T | 275  |
| 4760 | LOC Os10g39200.1 | DSVSGLDSPGDATCSDEDNGRKAPS  | T | 1016 |
| 4762 | LOC Os10g41030.1 | SACISYDSHTEETGLRKEWVPLRQE  | T | 1597 |
| 4763 | LOC Os10g42110.1 | LMKNSRDGKSYSTNLAYTPPEFLRT  | T | 234  |
| 4765 | LOC Os11g02190.1 | PSPIESPLSRSTFEDNPIRHSTGK   | T | 623  |
| 4766 | LOC Os11g03360.1 | SGERKLWLALWTKVQAKIKIFAWK   | T | 193  |
| 4767 | LOC Os11g06650.1 | GGGGNCGAAAATTPSPRGAAVAEGE  | T | 74   |
| 4768 | LOC Os11g07040.1 | MRKGNAGGAGRRTMRNSLQLNLGEI  | T | 495  |
| 4770 | LOC Os11g10480.1 | HTDVYFWEAKGQTPVFPRIFGHEAG  | T | 60   |
| 4772 | LOC Os11g19250.1 | FTEKFDEETIGGTEMADDENLTKEQ  | T | 447  |
| 4778 | LOC Os11g31890.1 | KSNFASDDLPSPTPSGDGDKSGDKG  | T | 459  |
| 4779 | LOC Os11g32900.1 | KYHPLQATFASPTVSNPVSGNEKCA  | T | 691  |
| 4782 | LOC Os11g34660.1 | CSYIRRKRLARKTSIPGSSSKWANH  | T | 191  |
| 4785 | LOC Os11g37100.1 | SASPNGATSRDKTPSPQASERPISI  | T | 445  |
| 4787 | LOC Os11g42930.1 | LGATTTDMPKFKTSLNDSALDS     | T | 144  |
| 4790 | LOC Os11g47830.1 | QAKEHDEKRRSYTPEYNDRRDADNG  | T | 360  |
| 4792 | LOC Os11g47830.1 | SDRRDAFIGHDETPPSAEWGSKLGT  | T | 478  |
| 4794 | LOC Os12g05420.1 | VPKVQTKPTYQRTLSSGLKSPRAAD  | T | 369  |
| 4798 | LOC Os12g06850.1 | HNSGGDGGSSVLTDGDSPDKIQGRS  | T | 192  |
| 4799 | LOC Os12g06870.1 | VPFFADDEESPATPKADAFFIPREN  | T | 701  |
| 4805 | LOC Os12g07530.1 | TPSPGRDHRIRRTSPSPYRDRRRIPD | T | 131  |
| 4809 | LOC Os12g10410.1 | VLGVWGMGGAGKTTLKLARDPRVQ   | T | 219  |
| 4810 | LOC Os12g10410.1 | LGVWGMGGAGKTTLKLARDPRVQT   | T | 220  |
| 4811 | LOC Os12g13770.1 | SDRHCTAGLTGGTRGLTGSAPVGR   | T | 596  |
| 4812 | LOC Os12g19040.1 | FVRHEADEEESDTSDDIVPVVVRPG  | T | 213  |
| 4814 | LOC Os12g21890.1 | GPQQDESAEGSTTPPTAQSGVFGSF  | T | 136  |

|      |                  |                           |   |     |
|------|------------------|---------------------------|---|-----|
| 4818 | LOC Os12g36510.1 | TDCANIGRAMVNTGDDRSIPPLAGD | T | 576 |
| 4819 | LOC Os12g37720.1 | SASVADDIDDLDTKKTSVRDKPYIS | T | 858 |
| 4820 | LOC Os12g38730.1 | EDGSARKLKKVPTWERILKSREPNR | T | 574 |
| 4824 | LOC Os12g43500.1 | YSTEPPDDGKCVTKEDLESDEAVWA | T | 92  |
| 4825 | LOC Os12g44330.1 | QRTTGVSGLGEGTPKSERSADMFC  | T | 548 |
| 4826 | LOC Os01g01150.1 | RPSSPAQASRDAYSADDDDDDRPH  | Y | 66  |
| 4827 | LOC Os01g01150.1 | PIKYRRSRRSRSYSPVRHTRGRRS  | Y | 544 |
| 4832 | LOC Os01g10840.1 | AKVLVPGEPNISYICSRYYRAPELI | Y | 225 |
| 4836 | LOC Os01g35050.1 | RQSRRNTPVPSKYNGSESPSLAEIV | Y | 751 |
| 4837 | LOC Os01g43170.1 | LVNKFQSHRSRDYTNPYLPVAPSAI | Y | 210 |
| 4839 | LOC Os01g48610.1 | FSLYITTHGGYGYASPVTLGSAMVD | Y | 456 |
| 4840 | LOC Os01g49640.1 | LCRYAKNPDLRKYINSQNSRKVAAA | Y | 83  |
| 4841 | LOC Os01g50320.1 | RKKHHPESEENYDSEESYKHSRKK  | Y | 730 |
| 4843 | LOC Os01g53680.1 | FSATCVRISRDSYPNLRALRNASAM | Y | 57  |
| 4844 | LOC Os01g57790.1 | TVQGALSDQLGNYVEAYVNDIVVKT | Y | 69  |
| 4847 | LOC Os02g05310.1 | LLATPTPLGTPLYAIPENRGQQFD  | Y | 421 |
| 4848 | LOC Os02g07070.1 | DRDYDRYSYSDYEKSRRDGSWRRR  | Y | 143 |
| 4850 | LOC Os02g08360.1 | EDRKGGRLGLSYSSGSDIAGDSGK  | Y | 789 |
| 4851 | LOC Os02g13250.1 | ELENLSSSQKKGYFKPKREKDVLT  | Y | 251 |
| 4852 | LOC Os02g14130.1 | AKMLVKGEANISYICSRYYRAPELI | Y | 234 |
| 4853 | LOC Os02g18660.1 | EEEEEDSDTDTYAQGFQLRKVG    | Y | 75  |
| 4854 | LOC Os02g18910.1 | FVLEKEDYPVVDYVLVIYAAKSATA | Y | 47  |
| 4856 | LOC Os02g28520.1 | GDEGGITLVQSHYVDKVLSTFGYSD | Y | 699 |
| 4859 | LOC Os02g33360.1 | FMQTRKGTVVQKYKVKVADVPGTG  | Y | 77  |
| 4860 | LOC Os02g35190.1 | QHRAPEREGSHNYDIESTDGSGGLW | Y | 18  |
| 4861 | LOC Os02g37880.1 | SLVSAMESRGTGYEKKALLILRD   | Y | 125 |
| 4865 | LOC Os02g46090.1 | FRGASQRHDEAGYAPVATSAAAAA  | Y | 29  |
| 4867 | LOC Os02g47220.1 | AREVTSVPPYTEYVSTRWYRAPEVL | Y | 158 |
| 4875 | LOC Os03g21530.1 | KKLALKAKFDAEYDGSDLSGEEVDN | Y | 720 |
| 4877 | LOC Os03g24890.1 | PARRDYRDHRDDYSPGESLSPHGQD | Y | 196 |
| 4879 | LOC Os03g40110.1 | KDDFDEEVPLDDYSDEEGHMILSKN | Y | 179 |
| 4880 | LOC Os03g50330.1 | NHKSAPDPSFYTGDDPDPSFYDR   | Y | 51  |
| 4885 | LOC Os04g02870.1 | ARGGYGRRDDSPYRRSVSPVYRSRP | Y | 189 |
| 4886 | LOC Os04g02870.1 | DDSPYRRSVSPVYRSRPSPDYGRQR | Y | 197 |
| 4888 | LOC Os04g08450.1 | ELCSSRVLSPPRYESGDEELSVLPR | Y | 18  |
| 4889 | LOC Os04g13960.1 | DGEVFRDDTMDYRTIIVQVRLSTQ  | Y | 162 |
| 4891 | LOC Os04g35800.1 | RSRSRGRSASPRYPDGKRRRHNDLN | Y | 93  |
| 4893 | LOC Os04g40660.1 | LDIPNAQEKFGAYVDLATERGWLLP | Y | 647 |
| 4895 | LOC Os05g11770.1 | WNIEPSLFFPKQYFSDTEEFEDVIY | Y | 278 |
| 4897 | LOC Os05g27820.1 | ALLRSSFKEDSYVASALPASDLRA  | Y | 52  |
| 4898 | LOC Os05g40060.1 | ARTSEDGFLWRKYGQKEIKNSKHPR | Y | 135 |
| 4899 | LOC Os05g40230.1 | KSLLRVTKDATAYRKVLKGLIVQSL | Y | 110 |
| 4906 | LOC Os06g05190.1 | KHQSKPRSDDAQYSDDTIEMTEEE  | Y | 320 |

|      |                  |                            |   |      |
|------|------------------|----------------------------|---|------|
| 4910 | LOC Os06g08840.1 | RRRSVSPARARSYSRSPQYNRGRDE  | Y | 160  |
| 4913 | LOC Os06g11610.1 | RLYNTEGAPLRRYDVVDESGTDSGD  | Y | 71   |
| 4920 | LOC Os06g39600.1 | TEKTFENMDAVAYMPVVRSGGWADI  | Y | 62   |
| 4921 | LOC Os06g43610.1 | KNGGGKEKPGSDYSEDDGETAEPNK  | Y | 356  |
| 4922 | LOC Os06g45560.1 | IDVAIVGSLGGSYLRSYNYKPATRP  | Y | 799  |
| 4923 | LOC Os06g48530.1 | REYDRAERDGSRYGRGDRSPSLDGA  | Y | 593  |
| 4924 | LOC Os06g49740.1 | DAEQEDAGSDDGYPQMTEKQKKLFE  | Y | 122  |
| 4925 | LOC Os06g50890.1 | GRARRERSRSLPSPYRMPERGYGR   | Y | 252  |
| 4927 | LOC Os06g50890.1 | PERRRYSGSPSPYRGNPKSRSRRS   | Y | 17   |
| 4928 | LOC Os06g51250.1 | AFARFDSMKSTDYNSRGYSFDEDDP  | Y | 1151 |
| 4929 | LOC Os07g01880.1 | VVASESEGSSEDDYYAGRGHEDEEPH | Y | 181  |
| 4930 | LOC Os07g05190.1 | SRFSWSPDSGEAYTQEGLARLDVRS  | Y | 747  |
| 4931 | LOC Os07g05610.1 | NLQHSLSRNARVYSGIDLKDEVTQ   | Y | 814  |
| 4932 | LOC Os07g08190.1 | RGFTQQYAFARRYRTPSPERSPVRS  | Y | 459  |
| 4933 | LOC Os07g19130.1 | SKVCEEDIQNMKYLKMI IKENFRLH | Y | 81   |
| 4934 | LOC Os07g25680.1 | LQPSDSAKSLETYTASKAMSAAQDS  | Y | 513  |
| 4935 | LOC Os07g31460.1 | SSTTRFPYRNDPYKLETRKGRCGE   | Y | 314  |
| 4938 | LOC Os07g41190.1 | RSGGDGEDDLVPYDEGLSSEDEGVD  | Y | 121  |
| 4940 | LOC Os08g02690.1 | RNDPNYDSDEEYPYELVEAPVSTPVE | Y | 123  |
| 4943 | LOC Os08g16930.1 | EPSSEEMEELHGYQEPVRVGRVMRY  | Y | 171  |
| 4944 | LOC Os08g17120.1 | SAPAKEAIKLSDYERTLKKASSRKS  | Y | 508  |
| 4946 | LOC Os09g19952.1 | YEETVMILNLMPYRASYPILKLVYS  | Y | 30   |
| 4947 | LOC Os09g28220.1 | PYRSRRDRSPSPYRDRRRQWSPYHR  | Y | 62   |
| 4948 | LOC Os09g31230.1 | PDLRASMVQRRGYTSDDDLDDLGNP  | Y | 722  |
| 4959 | LOC Os11g44880.1 | ESKQVGRSAPLKYGGILKPSMSGKH  | Y | 184  |
| 4960 | LOC Os12g03899.1 | KKGSTGTGVDDGYCIEGCPGCVVDR  | Y | 29   |
| 4962 | LOC Os12g06850.1 | RSYQNAQVSDFKYSPSPQRHNLSS   | Y | 215  |
| 4964 | LOC Os12g38970.1 | QPDDVVAEDDMRYESDENRELKPKE  | Y | 261  |
| 4965 | LOC Os12g41920.1 | TASGKLIKVNRYRIAPSSSLSEGR   | Y | 182  |
